# Supplementary material for: De novo RNA-Seq Analysis of the Venus Clam, Cyclina sinensis, and the Identification of Immune-Related Genes
Source: PLoS One. 2015 Apr 8;10(4):e0123296. doi: 10.1371/journal.pone.0123296 (PMC4390376; doi:10.1371/journal.pone.0123296)
Supplement: S3 Table — (XLS) [file pone.0123296.s003.xls]

geneID(3664)	geneLength	M_rawfragments(5570554)	T_rawfragments(4647132)	M_FPKM	T_FPKM	log2 Ratio(T/M)	Up-Down-Regulation(T/M)	P-value	FDR	Nr-ID	Nr-Score	Nr-Evalue	Nr-annotation	Nt-ID	Nt-Score	Nt-Evalue	Nt-annotation	Swissprot-ID	Swissprot-Score	Swissprot-Evalue	Swissprot-annotation	COG-Protein-or-Domain	COG-Score	COG-Evalue	COG-ID	COG-Function-Description	KO_id	KEGG-Evalue	KEGG-Score	KEGG-Gene	ko_definition	GO-BiologicalProcess	GO-MolecularFunction	Go-CellularComponent	Pathway ID//Pathway
Unigene1011_sinensis	298	0	58	0.0000	41.8819	15.3540392721143	Up	1.297612e-20	6.24332392458564e-19	--	--	--	--	--	--	--	--	--	--	--	--	--	--	--	--	--	--	--	--	--	--	-	-	-	--
CL6325.Contig1_sinensis	1833	0	295	0.0000	34.6318	15.0798097536161	Up	1.045772e-101	1.65586112427273e-99	gi|405968230|gb|EKC33316.1|	308.9	5e-82	Serine/threonine-protein kinase CTR1 [Crassostrea gigas]	--	--	--	--	sp|Q55GU0|Y9955_DICDI	156	1e-37	Probable serine/threonine-protein kinase DDB_G0267514 OS=Dictyostelium discoideum GN=DDB_G0267514 PE=3 SV=1	BS_yloP_1	103	1e-21	COG0515	Serine/threonine protein kinase	K04427	6e-31	136	cqu:CpipJ_CPIJ006370	mitogen-activated protein kinase kinase kinase 7 [EC:2.7.11.25]	-	GO:0016740//transferase activity	-	--
Unigene31535_sinensis	309	0	49	0.0000	34.1234	15.0584737811517	Up	1.558306e-17	6.57973458872727e-16	gi|327273047|ref|XP_003221294.1|	53.9	2e-06	PREDICTED: probable E3 ubiquitin-protein ligase HERC6-like [Anolis carolinensis]	--	--	--	--	sp|Q8IVU3|HERC6_HUMAN	80.9	6e-16	Probable E3 ubiquitin-protein ligase HERC6 OS=Homo sapiens GN=HERC6 PE=2 SV=2	CAC2722	75.5	2e-14	COG5184	Alpha-tubulin suppressor and related RCC1 domain-containing proteins	K11494	1e-16	85.1	tgu:100229178	RCC1 and BTB domain-containing protein	-	-	-	--
Unigene26602_sinensis	541	0	75	0.0000	29.8318	14.8645634096103	Up	1.97832e-26	1.15240448227425e-24	gi|405963669|gb|EKC29225.1|	121.7	1e-26	Zygote arrest protein 1 [Crassostrea gigas]	--	--	--	--	sp|Q86SH2|ZAR1_HUMAN	87.8	1e-17	Zygote arrest protein 1 OS=Homo sapiens GN=ZAR1 PE=2 SV=1	--	--	--	--	--	K14344	8e-13	73.6	gga:770263	solute carrier family 10 (sodium/bile acid cotransporter), member 4	-	-	-	--
Unigene16115_sinensis	264	0	29	0.0000	23.6379	14.5288142511833	Up	1.086434e-10	3.14461031765683e-09	gi|786117|gb|AAA98076.1|	52.8	6e-06	nuclear protein [Ensis minor]	--	--	--	--	--	--	--	--	--	--	--	--	--	K11141	2e-06	50.8	dsi:Dsim_GD18895	glutamyl aminopeptidase [EC:3.4.11.7]	-	-	-	--
Unigene34576_sinensis	824	0	89	0.0000	23.2422	14.5044590136478	Up	3.2059e-31	2.13325546418338e-29	gi|321460422|gb|EFX71464.1|	110.5	9e-23	hypothetical protein DAPPUDRAFT_255671 [Daphnia pulex]	--	--	--	--	--	--	--	--	--	--	--	--	--	--	--	--	--	--	-	-	-	--
CL1346.Contig1_sinensis	355	0	37	0.0000	22.4279	14.4530069218898	Up	1.98913e-13	6.81321032300885e-12	gi|405964393|gb|EKC29886.1|	58.9	8e-08	hypothetical protein CGI_10023461 [Crassostrea gigas]	--	--	--	--	--	--	--	--	--	--	--	--	--	--	--	--	--	--	-	-	-	--
Unigene29263_sinensis	450	0	41	0.0000	19.6059	14.2590002491894	Up	8.51124e-15	3.15745250031949e-13	--	--	--	--	--	--	--	--	--	--	--	--	--	--	--	--	--	--	--	--	--	--	-	-	-	--
Unigene28982_sinensis	726	0	64	0.0000	18.9696	14.2114016374185	Up	1.148522e-22	5.97137158343284e-21	gi|307166290|gb|EFN60481.1|	84.3	5e-15	hypothetical protein EAG_10563 [Camponotus floridanus]	--	--	--	--	--	--	--	--	--	--	--	--	--	--	--	--	--	--	-	-	-	--
Unigene36467_sinensis	257	0	22	0.0000	18.4206	14.1690324335372	Up	2.69884e-08	6.18098237869822e-07	--	--	--	--	--	--	--	--	--	--	--	--	--	--	--	--	--	--	--	--	--	--	-	-	-	--
Unigene37117_sinensis	251	0	20	0.0000	17.1463	14.0656096703761	Up	1.304702e-07	2.7345753200361e-06	--	--	--	--	--	--	--	--	--	--	--	--	--	--	--	--	--	--	--	--	--	--	-	-	-	--
Unigene36424_sinensis	302	0	24	0.0000	17.1009	14.0617846339804	Up	5.58266e-09	1.3719165415873e-07	--	--	--	--	--	--	--	--	--	--	--	--	--	--	--	--	--	--	--	--	--	--	-	-	-	--
CL2736.Contig1_sinensis	406	0	26	0.0000	13.7804	13.7503301449241	Up	1.154798e-09	3.05095266825939e-08	--	--	--	--	--	--	--	--	--	--	--	--	--	--	--	--	--	--	--	--	--	--	-	-	-	--
CL7578.Contig1_sinensis	316	0	20	0.0000	13.6194	13.7333755266519	Up	1.304702e-07	2.73704557777778e-06	--	--	--	--	--	--	--	--	--	--	--	--	--	--	--	--	--	--	--	--	--	--	-	-	-	--
CL2380.Contig2_sinensis	320	0	20	0.0000	13.4492	13.7152327389218	Up	1.304702e-07	2.7362216627935e-06	gi|405971270|gb|EKC36116.1|	55.8	7e-07	Putative ferric-chelate reductase 1 [Crassostrea gigas]	--	--	--	--	--	--	--	--	--	--	--	--	--	--	--	--	--	--	-	-	-	--
CL3607.Contig1_sinensis	293	0	18	0.0000	13.2196	13.6903909038423	Up	6.30734e-07	1.20987354201542e-05	--	--	--	--	--	--	--	--	--	--	--	--	--	--	--	--	--	--	--	--	--	--	-	-	-	--
Unigene35227_sinensis	273	0	16	0.0000	12.6117	13.6224751370763	Up	3.04918e-06	5.30685289582813e-05	--	--	--	--	--	--	--	--	--	--	--	--	--	--	--	--	--	--	--	--	--	--	-	-	-	--
Unigene32067_sinensis	429	0	24	0.0000	12.0384	13.5553560386358	Up	5.58266e-09	1.37531237461103e-07	--	--	--	--	--	--	--	--	--	--	--	--	--	--	--	--	--	--	--	--	--	--	-	-	-	--
Unigene9200_sinensis	492	0	27	0.0000	11.8090	13.5275991803452	Up	5.25216e-10	1.43495190211765e-08	--	--	--	--	--	--	--	--	--	--	--	--	--	--	--	--	--	--	--	--	--	--	-	-	-	--
CL3197.Contig3_sinensis	456	0	24	0.0000	11.3256	13.4672998619706	Up	5.58266e-09	1.37482622672322e-07	--	--	--	--	--	--	--	--	--	--	--	--	--	--	--	--	--	--	--	--	--	--	-	-	-	--
Unigene28539_sinensis	306	0	16	0.0000	11.2516	13.457842549697	Up	3.04918e-06	5.31614918468468e-05	gi|321460420|gb|EFX71462.1|	66.2	5e-10	hypothetical protein DAPPUDRAFT_111636 [Daphnia pulex]	--	--	--	--	sp|P49918|CDN1C_HUMAN	54.3	6e-08	Cyclin-dependent kinase inhibitor 1C OS=Homo sapiens GN=CDKN1C PE=1 SV=1	--	--	--	--	--	K09993	2e-07	54.3	hsa:1028	cyclin-dependent kinase inhibitor 1C	-	-	-	--
CL3607.Contig2_sinensis	411	0	20	0.0000	10.4714	13.3541667194334	Up	1.304702e-07	2.73210951722272e-06	gi|5921456|sp|P56698.1|CAC1B_DISOM	52.4	7e-06	RecName: Full=Probable voltage-dependent N-type calcium channel subunit alpha-1B; AltName: Full=DOE-4; AltName: Full=Voltage-gated calcium channel subunit alpha Cav2.2	--	--	--	--	sp|P56698|CAC1B_DIPOM	52.4	3e-07	Probable voltage-dependent N-type calcium channel subunit alpha-1B OS=Diplobatis ommata PE=2 SV=1	--	--	--	--	--	K08818	2e-06	51.2	dwi:Dwil_GK10511	cell division cycle 2-like [EC:2.7.11.22]	-	-	-	--
Unigene32070_sinensis	484	0	23	0.0000	10.2258	13.3199260941966	Up	1.227464e-08	2.90871392571429e-07	--	--	--	--	--	--	--	--	--	--	--	--	--	--	--	--	--	--	--	--	--	--	-	-	-	--
Unigene13678_sinensis	253	0	12	0.0000	10.2065	13.3172006034227	Up	7.1261e-05	0.000961775011429678	gi|301618542|ref|XP_002938670.1|	53.1	4e-06	PREDICTED: probable E3 ubiquitin-protein ligase HERC6-like [Xenopus (Silurana) tropicalis]	--	--	--	--	sp|Q9UII4|HERC5_HUMAN	57.0	9e-09	E3 ISG15--protein ligase HERC5 OS=Homo sapiens GN=HERC5 PE=1 SV=2	CAC2722	65.1	3e-11	COG5184	Alpha-tubulin suppressor and related RCC1 domain-containing proteins	K10615	1e-09	61.6	tad:TRIADDRAFT_59918	E3 ubiquitin-protein ligase HERC4 [EC:6.3.2.19]	-	-	-	--
Unigene27835_sinensis	533	0	24	0.0000	9.6894	13.2421916165744	Up	5.58266e-09	1.37385496128576e-07	--	--	--	--	--	--	--	--	--	--	--	--	--	--	--	--	--	--	--	--	--	--	-	-	-	--
Unigene31121_sinensis	336	0	15	0.0000	9.6065	13.2297951847165	Up	6.70424e-06	0.000110081945925053	--	--	--	--	--	--	--	--	--	--	--	--	--	--	--	--	--	--	--	--	--	--	-	-	-	--
Unigene27973_sinensis	462	0	20	0.0000	9.3154	13.1854020039768	Up	1.304702e-07	2.73293095724594e-06	--	--	--	--	--	--	--	--	--	--	--	--	--	--	--	--	--	--	--	--	--	--	-	-	-	--
Unigene40055_sinensis	278	0	12	0.0000	9.2886	13.1812454512095	Up	7.1261e-05	0.000961961365820577	gi|307177477|gb|EFN66604.1|	25.8	6e-06	hypothetical protein EAG_15602 [Camponotus floridanus]	--	--	--	--	--	--	--	--	--	--	--	--	--	--	--	--	--	--	-	-	-	--
Unigene35223_sinensis	916	0	39	0.0000	9.1619	13.1614311009243	Up	4.1146e-14	1.46629190485934e-12	gi|410170775|ref|XP_003960007.1|	55.5	4e-06	PREDICTED: uncharacterized protein LOC101060018 [Homo sapiens]	--	--	--	--	sp|Q8IYB3|SRRM1_HUMAN	56.2	1e-07	Serine/arginine repetitive matrix protein 1 OS=Homo sapiens GN=SRRM1 PE=1 SV=2	--	--	--	--	--	K13171	2e-08	60.5	ssc:100521629	serine/arginine repetitive matrix protein 1	-	-	-	--
CL10268.Contig1_sinensis	539	0	22	0.0000	8.7831	13.1005145143172	Up	2.69884e-08	6.1789511652974e-07	--	--	--	--	--	--	--	--	--	--	--	--	--	--	--	--	--	--	--	--	--	--	-	-	-	--
Unigene16276_sinensis	298	0	12	0.0000	8.6652	13.0810173330294	Up	7.1261e-05	0.000961588729227194	gi|145488683|ref|XP_001430345.1|	52.4	7e-06	hypothetical protein [Paramecium tetraurelia strain d4-2] >gi|124397442|emb|CAK62947.1| unnamed protein product [Paramecium tetraurelia]	--	--	--	--	sp|P04929|HRPX_PLALO	48.9	2e-06	Histidine-rich glycoprotein OS=Plasmodium lophurae PE=4 SV=1	PM0926	48.5	3e-06	COG4531	ABC-type Zn2+ transport system, periplasmic component/surface adhesin	K03424	8e-07	52.4	oaa:100074134	TatD DNase family protein [EC:3.1.21.-]	-	-	-	--
Unigene24791_sinensis	476	0	19	0.0000	8.5894	13.0683416421892	Up	2.86866e-07	5.76287985986159e-06	--	--	--	--	--	--	--	--	--	--	--	--	--	--	--	--	--	--	--	--	--	--	-	-	-	--
Unigene32295_sinensis	308	0	12	0.0000	8.3839	13.0334057937173	Up	7.1261e-05	0.000962520862543622	--	--	--	--	--	--	--	--	--	--	--	--	--	--	--	--	--	--	--	--	--	--	-	-	-	--
Unigene37376_sinensis	3518	0	136	0.0000	8.3187	13.0221423743155	Up	2.65508e-47	2.41169189726206e-45	gi|291239795|ref|XP_002739813.1|	741.5	0.0	PREDICTED: receptor for egg jelly 6-like [Saccoglossus kowalevskii]	--	--	--	--	sp|Q9NTG1|PKDRE_HUMAN	324	7e-88	Polycystic kidney disease and receptor for egg jelly-related protein OS=Homo sapiens GN=PKDREJ PE=2 SV=2	--	--	--	--	--	K04988	3e-114	414	bfo:BRAFLDRAFT_92411	polycystin 1L2	-	-	-	--
CL9938.Contig1_sinensis	340	0	13	0.0000	8.2277	13.0062734756563	Up	3.24104e-05	0.000471595688721805	--	--	--	--	--	--	--	--	--	--	--	--	--	--	--	--	--	--	--	--	--	--	-	-	-	--
CL6258.Contig1_sinensis	629	0	24	0.0000	8.2106	13.0032719372858	Up	5.58266e-09	1.37579886643085e-07	--	--	--	--	--	--	--	--	--	--	--	--	--	--	--	--	--	--	--	--	--	--	-	-	-	--
Unigene26395_sinensis	399	0	15	0.0000	8.0897	12.9818704871273	Up	6.70424e-06	0.000110133859127564	--	--	--	--	--	--	--	--	--	--	--	--	--	--	--	--	--	--	--	--	--	--	-	-	-	--
Unigene14116_sinensis	374	0	14	0.0000	8.0551	12.9756867840357	Up	1.474066e-05	0.000229284894293369	--	--	--	--	--	--	--	--	--	--	--	--	--	--	--	--	--	--	--	--	--	--	-	-	-	--
Unigene20575_sinensis	1566	0	58	0.0000	7.9699	12.9603459071954	Up	1.297612e-20	6.23901521242236e-19	gi|405952598|gb|EKC20391.1|	30.4	3e-06	Collagen alpha-6(VI) chain [Crassostrea gigas]	--	--	--	--	--	--	--	--	--	--	--	--	--	--	--	--	--	--	-	-	-	--
Unigene29600_sinensis	570	0	21	0.0000	7.9279	12.9527230496065	Up	5.93396e-08	1.30702832513437e-06	gi|405957841|gb|EKC24021.1|	212.6	8e-54	von Willebrand factor A domain-containing protein 3B [Crassostrea gigas]	--	--	--	--	sp|A6NCI4|VWA3A_HUMAN	79.7	4e-15	von Willebrand factor A domain-containing protein 3A OS=Homo sapiens GN=VWA3A PE=2 SV=3	--	--	--	--	--	--	--	--	--	--	-	-	-	--
Unigene29030_sinensis	327	0	12	0.0000	7.8968	12.9470524367625	Up	7.1261e-05	0.000963641810753106	--	--	--	--	--	--	--	--	--	--	--	--	--	--	--	--	--	--	--	--	--	--	-	-	-	--
Unigene16744_sinensis	412	0	15	0.0000	7.8345	12.9356254890934	Up	6.70424e-06	0.000109952376779661	--	--	--	--	--	--	--	--	--	--	--	--	--	--	--	--	--	--	--	--	--	--	-	-	-	--
Unigene8104_sinensis	413	0	15	0.0000	7.8155	12.9321224578801	Up	6.70424e-06	0.000110056007672008	--	--	--	--	--	--	--	--	--	--	--	--	--	--	--	--	--	--	--	--	--	--	-	-	-	--
Unigene25466_sinensis	415	0	15	0.0000	7.7778	12.9251464221447	Up	6.70424e-06	0.000110030081639576	gi|390336260|ref|XP_003724311.1|	71.2	1e-11	PREDICTED: RNA-directed DNA polymerase from mobile element jockey-like [Strongylocentrotus purpuratus]	--	--	--	--	--	--	--	--	--	--	--	--	--	--	--	--	--	--	-	-	-	--
Unigene29272_sinensis	362	0	13	0.0000	7.7277	12.9158233725064	Up	3.24104e-05	0.000471792761721688	--	--	--	--	--	--	--	--	--	--	--	--	--	--	--	--	--	--	--	--	--	--	-	-	-	--
Unigene32064_sinensis	709	0	25	0.0000	7.5877	12.8894469237346	Up	2.53906e-09	6.49628245097319e-08	--	--	--	--	--	--	--	--	--	--	--	--	--	--	--	--	--	--	--	--	--	--	-	-	-	--
CL2791.Contig2_sinensis	377	0	13	0.0000	7.4202	12.8572423576429	Up	3.24104e-05	0.000471497213948632	gi|156403644|ref|XP_001640018.1|	58.9	8e-08	predicted protein [Nematostella vectensis] >gi|156227150|gb|EDO47955.1| predicted protein [Nematostella vectensis]	--	--	--	--	sp|O96185|YPF08_PLAF7	58.2	4e-09	Uncharacterized protein PFB0460c OS=Plasmodium falciparum (isolate 3D7) GN=PFB0460c PE=3 SV=1	BH2760	53.1	1e-07	COG0803	ABC-type metal ion transport system, periplasmic component/surface adhesin	K14716	1e-08	58.2	bfo:BRAFLDRAFT_123712	solute carrier family 39 (zinc transporter), member 10	-	-	-	--
Unigene39492_sinensis	494	0	17	0.0000	7.4052	12.8543229850799	Up	1.386802e-06	2.53788044491726e-05	--	--	--	--	--	--	--	--	--	--	--	--	--	--	--	--	--	--	--	--	--	--	-	-	-	--
CL10525.Contig1_sinensis	586	0	20	0.0000	7.3442	12.8423896319595	Up	1.304702e-07	2.73539824369546e-06	--	--	--	--	--	--	--	--	--	--	--	--	--	--	--	--	--	--	--	--	--	--	-	-	-	--
CL6840.Contig2_sinensis	352	0	12	0.0000	7.3359	12.8407582574981	Up	7.1261e-05	0.00096233429133553	gi|332026154|gb|EGI66301.1|	38.9	4e-08	FLJ37770-like protein [Acromyrmex echinatior]	--	--	--	--	sp|Q3ZCU0|YK006_HUMAN	37.4	5e-07	Putative uncharacterized protein FLJ37770 OS=Homo sapiens PE=5 SV=1	--	--	--	--	--	--	--	--	--	--	-	-	-	--
Unigene38327_sinensis	1271	0	43	0.0000	7.2801	12.8297425521895	Up	1.76059e-15	6.75804654049587e-14	gi|405966044|gb|EKC31369.1|	138.7	6e-31	Collagen alpha-1(XII) chain [Crassostrea gigas]	--	--	--	--	sp|A6NMZ7|CO6A6_HUMAN	175	2e-43	Collagen alpha-6(VI) chain OS=Homo sapiens GN=COL6A6 PE=1 SV=2	--	--	--	--	--	K06238	1e-47	191	xtr:100486063	collagen, type VI, alpha	-	-	-	--
Unigene27766_sinensis	631	0	21	0.0000	7.1615	12.806046081078	Up	5.93396e-08	1.30455367384033e-06	--	--	--	--	--	--	--	--	--	--	--	--	--	--	--	--	--	--	--	--	--	--	-	-	-	--
Unigene4507_sinensis	363	0	12	0.0000	7.1136	12.7963641381396	Up	7.1261e-05	0.000964765372910999	--	--	--	--	--	--	--	--	--	--	--	--	--	--	--	--	--	--	--	--	--	--	-	-	-	--
CL2678.Contig1_sinensis	403	0	13	0.0000	6.9415	12.7610317354669	Up	3.24104e-05	0.000470907227862357	gi|326436475|gb|EGD82045.1|	55.8	7e-07	hypothetical protein PTSG_11912 [Salpingoeca sp. ATCC 50818]	--	--	--	--	--	--	--	--	--	--	--	--	--	--	--	--	--	--	-	-	-	--
CL4993.Contig2_sinensis	499	0	16	0.0000	6.8998	12.7523388286993	Up	3.04918e-06	5.3108330355e-05	--	--	--	--	--	--	--	--	--	--	--	--	--	--	--	--	--	--	--	--	--	--	-	-	-	--
Unigene13849_sinensis	410	0	13	0.0000	6.8230	12.7361905009609	Up	3.24104e-05	0.000471300387726988	--	--	--	--	--	--	--	--	--	--	--	--	--	--	--	--	--	--	--	--	--	--	-	-	-	--
Unigene21398_sinensis	384	0	12	0.0000	6.7246	12.7152327389218	Up	7.1261e-05	0.000962707506108203	--	--	--	--	--	--	--	--	--	--	--	--	--	--	--	--	--	--	--	--	--	--	-	-	-	--
Unigene85_sinensis	1802	0	56	0.0000	6.6873	12.7072081243981	Up	6.27306e-20	2.93117248249497e-18	gi|291223535|ref|XP_002731765.1|	65.9	8e-09	PREDICTED: hemicentin 2-like [Saccoglossus kowalevskii]	--	--	--	--	sp|A2AJ76|HMCN2_MOUSE	90.9	8e-18	Hemicentin-2 OS=Mus musculus GN=Hmcn2 PE=1 SV=1	--	--	--	--	--	K06467	7e-16	86.3	dre:556718	CD22 antigen	-	-	-	--
Unigene25910_sinensis	837	0	26	0.0000	6.6844	12.7065823527036	Up	1.154798e-09	3.05211008581184e-08	--	--	--	--	--	--	--	--	--	--	--	--	--	--	--	--	--	--	--	--	--	--	-	-	-	--
Unigene8379_sinensis	647	0	20	0.0000	6.6518	12.6995290763561	Up	1.304702e-07	2.74117260669481e-06	--	--	--	--	--	--	--	--	--	--	--	--	--	--	--	--	--	--	--	--	--	--	-	-	-	--
Unigene29264_sinensis	650	0	20	0.0000	6.6211	12.6928552045212	Up	1.304702e-07	2.73375289136842e-06	gi|156352506|ref|XP_001622790.1|	186.0	1e-45	hypothetical protein NEMVEDRAFT_v1g139805 [Nematostella vectensis] >gi|156209407|gb|EDO30690.1| predicted protein [Nematostella vectensis]	--	--	--	--	sp|Q8R151|ZNFX1_MOUSE	168	1e-41	NFX1-type zinc finger-containing protein 1 OS=Mus musculus GN=Znfx1 PE=2 SV=3	--	--	--	--	--	K15683	6e-06	51.2	spu:581152	NF-X1-type zinc finger protein NFXL1	-	-	-	--
CL3788.Contig3_sinensis	558	0	17	0.0000	6.5559	12.6785781332111	Up	1.386802e-06	2.53854725533368e-05	--	--	--	--	--	--	--	--	--	--	--	--	--	--	--	--	--	--	--	--	--	--	-	-	-	--
CL3474.Contig1_sinensis	528	0	16	0.0000	6.5208	12.6708332560558	Up	3.04918e-06	5.30817894602699e-05	gi|5932010|gb|AAD56763.1|AF135491_1	55.1	1e-06	neuronal apoptosis inhibitory protein [Mus musculus]	--	--	--	--	sp|Q9QWK5|BIR1A_MOUSE	71.2	1e-12	Baculoviral IAP repeat-containing protein 1a OS=Mus musculus GN=Naip1 PE=2 SV=3	--	--	--	--	--	K12807	4e-12	71.2	mmu:17940	baculoviral IAP repeat-containing protein 1	GO:0006954//inflammatory response;GO:0042742//defense response to bacterium;GO:0070269//pyroptosis;GO:0010466//negative regulation of peptidase activity;GO:0042981//regulation of apoptotic process;GO:0071391//cellular response to estrogen stimulus;GO:0016045//detection of bacterium	GO:0004869//cysteine-type endopeptidase inhibitor activity	GO:0072557//IPAF inflammasome complex	--
Unigene36559_sinensis	504	0	15	0.0000	6.4044	12.6448477018221	Up	6.70424e-06	0.000110004167819124	--	--	--	--	--	--	--	--	--	--	--	--	--	--	--	--	--	--	--	--	--	--	-	-	-	--
Unigene14164_sinensis	985	0	28	0.0000	6.1170	12.5786085607378	Up	2.38876e-10	6.72142651211632e-09	gi|405971638|gb|EKC36463.1|	330.5	8e-89	Sodium/glucose cotransporter 4 [Crassostrea gigas]	--	--	--	--	sp|A8WHP3|SC5A9_DANRE	285	8e-77	Sodium/glucose cotransporter 4 OS=Danio rerio GN=slc5a9 PE=2 SV=1	BH2222	73.6	5e-13	COG4146	Predicted symporter	K14389	3e-76	285	dre:564815	solute carrier family 5 (sodium/glucose cotransporter), member 9	GO:0044765	-	-	--
Unigene22999_sinensis	640	0	18	0.0000	6.0521	12.5632201103384	Up	6.30734e-07	1.20954051874484e-05	--	--	--	--	--	--	--	--	--	--	--	--	--	--	--	--	--	--	--	--	--	--	-	-	-	--
CL8840.Contig1_sinensis	581	0	16	0.0000	5.9260	12.5328429109613	Up	3.04918e-06	5.31216107576894e-05	--	--	--	--	--	--	--	--	--	--	--	--	--	--	--	--	--	--	--	--	--	--	-	-	-	--
Unigene20148_sinensis	1493	0	41	0.0000	5.9093	12.5287715273592	Up	8.51124e-15	3.15913468066063e-13	gi|260795200|ref|XP_002592594.1|	105.5	7e-21	hypothetical protein BRAFLDRAFT_68917 [Branchiostoma floridae] >gi|229277815|gb|EEN48605.1| hypothetical protein BRAFLDRAFT_68917 [Branchiostoma floridae]	--	--	--	--	sp|F7J220|SRCR1_ASTPE	130	1e-29	Scavenger receptor cysteine-rich domain superfamily protein OS=Asterina pectinifera GN=SRCR1 PE=1 SV=1	--	--	--	--	--	K09624	1e-32	141	xtr:100495119	protease, serine, 12 (neurotrypsin, motopsin) [EC:3.4.21.-]	-	-	-	--
Unigene39359_sinensis	734	0	20	0.0000	5.8634	12.517521765127	Up	1.304702e-07	2.74034620554718e-06	gi|405966262|gb|EKC31569.1|	59.7	1e-07	Deleted in malignant brain tumors 1 protein [Crassostrea gigas]	--	--	--	--	sp|O08762|NETR_MOUSE	84.0	3e-16	Neurotrypsin OS=Mus musculus GN=Prss12 PE=2 SV=1	--	--	--	--	--	K09624	5e-16	85.1	acs:100561050	protease, serine, 12 (neurotrypsin, motopsin) [EC:3.4.21.-]	-	GO:0016787//hydrolase activity	-	--
Unigene8783_sinensis	1733	0	47	0.0000	5.8360	12.5107641679179	Up	7.53334e-17	3.07643765803048e-15	gi|405964802|gb|EKC30248.1|	102.1	1e-19	hypothetical protein CGI_10023028 [Crassostrea gigas]	--	--	--	--	--	--	--	--	--	--	--	--	--	--	--	--	--	--	-	-	-	--
Unigene23720_sinensis	445	0	12	0.0000	5.8028	12.5025334903101	Up	7.1261e-05	0.000961402519171185	gi|405961705|gb|EKC27466.1|	82.0	9e-15	hypothetical protein CGI_10005453 [Crassostrea gigas]	--	--	--	--	sp|Q63HN8|RN213_HUMAN	52.8	3e-07	E3 ubiquitin-protein ligase RNF213 OS=Homo sapiens GN=RNF213 PE=1 SV=3	--	--	--	--	--	--	--	--	--	--	-	-	-	--
Unigene22245_sinensis	448	0	12	0.0000	5.7639	12.4928295905503	Up	7.1261e-05	0.000962894222071373	gi|198427663|ref|XP_002120645.1|	79.0	7e-14	PREDICTED: collectin-10-like [Ciona intestinalis]	--	--	--	--	sp|P07439|LEC3_MEGRO	65.1	5e-11	Lectin BRA-3 OS=Megabalanus rosa PE=1 SV=2	--	--	--	--	--	K06560	5e-13	73.6	cin:100176419	mannose receptor, C type	-	-	-	--
Unigene875_sinensis	797	0	21	0.0000	5.6699	12.4691075752482	Up	5.93396e-08	1.30578982703727e-06	--	--	--	--	--	--	--	--	--	--	--	--	--	--	--	--	--	--	--	--	--	--	-	-	-	--
Unigene27425_sinensis	1292	0	34	0.0000	5.6628	12.4672998619706	Up	2.1143e-12	6.87039023787313e-11	gi|2988366|dbj|BAA25310.1|	141.0	1e-31	sarcoplasmic calcium-binding protein [Meretrix lusoria]	--	--	--	--	sp|P02637|SCP_MIZYE	102	2e-21	Sarcoplasmic calcium-binding protein OS=Mizuhopecten yessoensis PE=1 SV=1	--	--	--	--	--	--	--	--	--	--	-	-	-	--
Unigene19631_sinensis	960	0	25	0.0000	5.6038	12.4521897514663	Up	2.53906e-09	6.49151453724771e-08	gi|405950672|gb|EKC18644.1|	266.5	1e-69	Sialate O-acetylesterase [Crassostrea gigas]	--	--	--	--	sp|P70665|SIAE_MOUSE	241	2e-63	Sialate O-acetylesterase OS=Mus musculus GN=Siae PE=2 SV=3	--	--	--	--	--	K05970	1e-64	246	bfo:BRAFLDRAFT_217332	sialate O-acetylesterase [EC:3.1.1.53]	-	-	-	--
Unigene36561_sinensis	616	0	16	0.0000	5.5893	12.4484518969319	Up	3.04918e-06	5.31348978039019e-05	--	--	--	--	--	--	--	--	--	--	--	--	--	--	--	--	--	--	--	--	--	--	-	-	-	--
Unigene23304_sinensis	1862	0	48	0.0000	5.5472	12.4375440263155	Up	3.42626e-17	1.41916829928656e-15	--	--	--	--	--	--	--	--	--	--	--	--	--	--	--	--	--	--	--	--	--	--	-	-	-	--
Unigene19464_sinensis	1610	0	41	0.0000	5.4799	12.4199338510558	Up	8.51124e-15	3.1557721104843e-13	gi|308485142|ref|XP_003104770.1|	58.2	1e-06	CRE-LRP-2 protein [Caenorhabditis remanei] >gi|308257468|gb|EFP01421.1| CRE-LRP-2 protein [Caenorhabditis remanei]	--	--	--	--	sp|P98157|LRP1_CHICK	110	7e-24	Low-density lipoprotein receptor-related protein 1 OS=Gallus gallus GN=LRP1 PE=2 SV=1	--	--	--	--	--	K04550	2e-25	118	cfa:481124	low density lipoprotein-related protein 1 (alpha-2-macroglobulin receptor)	GO:0044763;GO:0051179//localization	-	-	--
Unigene2589_sinensis	563	0	14	0.0000	5.3510	12.3855928136014	Up	1.474066e-05	0.000228876095729886	--	--	--	--	--	--	--	--	--	--	--	--	--	--	--	--	--	--	--	--	--	--	-	-	-	--
Unigene22115_sinensis	845	0	21	0.0000	5.3478	12.3847297963904	Up	5.93396e-08	1.3074416800759e-06	gi|405950510|gb|EKC18494.1|	233.4	1e-59	Sorcin [Crassostrea gigas]	--	--	--	--	sp|P28676|GRAN_HUMAN	120	5e-27	Grancalcin OS=Homo sapiens GN=GCA PE=1 SV=2	--	--	--	--	--	K08585	1e-15	84.3	nvi:100119123	calpain, invertebrate [EC:3.4.22.-]	-	GO:0046982//protein heterodimerization activity;GO:0042803//protein homodimerization activity;GO:0005509//calcium ion binding	GO:0005737//cytoplasm;GO:0005886//plasma membrane	--
Unigene39311_sinensis	770	0	19	0.0000	5.3098	12.3744418058719	Up	2.86866e-07	5.76620523773803e-06	--	--	--	--	--	--	--	--	--	--	--	--	--	--	--	--	--	--	--	--	--	--	-	-	-	--
Unigene949_sinensis	895	0	22	0.0000	5.2895	12.3689156399668	Up	2.69884e-08	6.17692128646518e-07	--	--	--	--	--	--	--	--	--	--	--	--	--	--	--	--	--	--	--	--	--	--	-	-	-	--
CL152.Contig1_sinensis	817	0	20	0.0000	5.2677	12.3629574698851	Up	1.304702e-07	2.73786998909639e-06	gi|405957218|gb|EKC23446.1|	35.8	1e-10	Tripartite motif-containing protein 56 [Crassostrea gigas]	--	--	--	--	--	--	--	--	--	--	--	--	--	--	--	--	--	--	-	-	-	--
Unigene39932_sinensis	534	0	13	0.0000	5.2386	12.3549655920503	Up	3.24104e-05	0.000472187402258469	gi|402912305|ref|XP_003919592.1|	53.1	6e-06	PREDICTED: LOW QUALITY PROTEIN: mucin-12 [Papio anubis]	--	--	--	--	--	--	--	--	--	--	--	--	--	--	--	--	--	--	-	-	-	--
Unigene13573_sinensis	535	0	13	0.0000	5.2288	12.3522641732583	Up	3.24104e-05	0.000472483816195857	--	--	--	--	--	--	--	--	--	--	--	--	--	--	--	--	--	--	--	--	--	--	-	-	-	--
Unigene6094_sinensis	578	0	14	0.0000	5.2121	12.3476490485605	Up	1.474066e-05	0.000229233714629464	--	--	--	--	--	--	--	--	--	--	--	--	--	--	--	--	--	--	--	--	--	--	-	-	-	--
CL7578.Contig4_sinensis	709	0	17	0.0000	5.1596	12.3330435091508	Up	1.386802e-06	2.53521670265022e-05	gi|426252674|ref|XP_004020029.1|	58.5	3e-07	PREDICTED: LOW QUALITY PROTEIN: PHD and RING finger domain-containing protein 1 [Ovis aries]	--	--	--	--	sp|Q02817|MUC2_HUMAN	52.8	7e-07	Mucin-2 OS=Homo sapiens GN=MUC2 PE=1 SV=2	--	--	--	--	--	K10955	2e-06	52.8	hsa:4583	intestinal mucin-2	-	-	-	--
Unigene27003_sinensis	1019	0	24	0.0000	5.0682	12.3072577415234	Up	5.58266e-09	1.37240063352152e-07	gi|390339862|ref|XP_003725106.1|	85.5	4e-15	PREDICTED: uncharacterized protein K02A2.6-like [Strongylocentrotus purpuratus]	--	--	--	--	--	--	--	--	--	--	--	--	--	--	--	--	--	--	-	-	-	--
Unigene26908_sinensis	894	0	21	0.0000	5.0547	12.3034097543659	Up	5.93396e-08	1.30620239886256e-06	--	--	--	--	--	--	--	--	--	--	--	--	--	--	--	--	--	--	--	--	--	--	-	-	-	--
Unigene10005_sinensis	727	0	17	0.0000	5.0319	12.2968875361842	Up	1.386802e-06	2.53921441624179e-05	gi|113373879|dbj|BAF03560.1|	34.3	6e-12	clam ADP-ribosylating protein CARP-1 [Meretrix lamarckii]	--	--	--	--	--	--	--	--	--	--	--	--	--	--	--	--	--	--	-	-	-	--
Unigene39332_sinensis	603	0	14	0.0000	4.9960	12.286557761608	Up	1.474066e-05	0.000228978158648829	gi|405952582|gb|EKC20377.1|	275.8	9e-73	Homeobox protein aristaless-like 4 [Crassostrea gigas]	gi|189236542|ref|XM_970436.2|	115	3e-22	PREDICTED: Tribolium castaneum similar to homeobox protein (LOC664429), mRNA	sp|O42356|RX1_DANRE	83.2	4e-16	Retinal homeobox protein Rx1 OS=Danio rerio GN=rx1 PE=2 SV=2	--	--	--	--	--	K09327	2e-19	95.9	acs:100558225	homeobox protein prophet of Pit-1	-	GO:0003677//DNA binding	-	--
Unigene27557_sinensis	1078	0	25	0.0000	4.9904	12.2849397424868	Up	2.53906e-09	6.49389761894273e-08	--	--	--	--	--	--	--	--	--	--	--	--	--	--	--	--	--	--	--	--	--	--	-	-	-	--
Unigene20771_sinensis	777	0	18	0.0000	4.9850	12.2833777892856	Up	6.30734e-07	1.21087371303389e-05	gi|156362246|ref|XP_001625691.1|	54.3	7e-06	predicted protein [Nematostella vectensis] >gi|156212535|gb|EDO33591.1| predicted protein [Nematostella vectensis]	--	--	--	--	sp|Q5Y4N8|EMR1_RAT	79.3	8e-15	EGF-like module-containing mucin-like hormone receptor-like 1 OS=Rattus norvegicus GN=Emr1 PE=2 SV=1	--	--	--	--	--	K06826	4e-17	89.0	spu:586685	nidogen (entactin)	-	-	-	--
CL9423.Contig2_sinensis	566	0	13	0.0000	4.9424	12.2709960607403	Up	3.24104e-05	0.00047189136	--	--	--	--	--	--	--	--	sp|Q96RW7|HMCN1_HUMAN	50.1	3e-06	Hemicentin-1 OS=Homo sapiens GN=HMCN1 PE=1 SV=2	--	--	--	--	--	--	--	--	--	--	-	-	-	--
Unigene19685_sinensis	1666	0	38	0.0000	4.9082	12.2609783219941	Up	9.04682e-14	3.1656599828227e-12	gi|260814930|ref|XP_002602166.1|	238.4	8e-61	hypothetical protein BRAFLDRAFT_97981 [Branchiostoma floridae] >gi|229287473|gb|EEN58178.1| hypothetical protein BRAFLDRAFT_97981 [Branchiostoma floridae]	--	--	--	--	sp|P86789|GIGA6_CRAGI	79.7	2e-14	Gigasin-6 OS=Crassostrea gigas PE=1 SV=1	mll2003	96.7	1e-19	COG1680	Beta-lactamase class C and other penicillin binding proteins	--	--	--	--	--	-	-	-	--
Unigene1558_sinensis	1054	0	24	0.0000	4.8999	12.2585365908336	Up	5.58266e-09	1.37288506720791e-07	gi|443686997|gb|ELT90114.1|	174.9	6e-42	hypothetical protein CAPTEDRAFT_89077 [Capitella teleta]	--	--	--	--	sp|Q9Y661|HS3S4_HUMAN	164	3e-40	Heparan sulfate glucosamine 3-O-sulfotransferase 4 OS=Homo sapiens GN=HS3ST4 PE=2 SV=2	--	--	--	--	--	K07809	7e-41	168	dre:558084	[heparan sulfate]-glucosamine 3-sulfotransferase 3 [EC:2.8.2.30]	-	-	-	--
Unigene39424_sinensis	1531	0	34	0.0000	4.7788	12.2224326745428	Up	2.1143e-12	6.87359620625292e-11	gi|405959106|gb|EKC25171.1|	429.5	2e-118	PH domain leucine-rich repeat-containing protein phosphatase 1 [Crassostrea gigas]	--	--	--	--	sp|Q8BXA7|PHLP2_MOUSE	218	3e-56	PH domain leucine-rich repeat-containing protein phosphatase 2 OS=Mus musculus GN=Phlpp2 PE=2 SV=3	SPCC4F11.02	90.1	9e-18	COG0631	Serine/threonine protein phosphatase	K01090	1e-55	218	mmu:244650	protein phosphatase [EC:3.1.3.16]	-	GO:0004721//phosphoprotein phosphatase activity	GO:0043231//intracellular membrane-bounded organelle;GO:0016020//membrane	--
Unigene1100_sinensis	870	0	19	0.0000	4.6995	12.1982915550922	Up	2.86866e-07	5.76121860882099e-06	--	--	--	--	--	--	--	--	--	--	--	--	--	--	--	--	--	--	--	--	--	--	-	-	-	--
Unigene23451_sinensis	692	0	15	0.0000	4.6644	12.187475798173	Up	6.70424e-06	0.000110211820802265	--	--	--	--	--	--	--	--	--	--	--	--	--	--	--	--	--	--	--	--	--	--	-	-	-	--
CL4850.Contig1_sinensis	692	0	15	0.0000	4.6644	12.187475798173	Up	6.70424e-06	0.000109978266202025	gi|156388373|ref|XP_001634675.1|	114.0	6e-24	predicted protein [Nematostella vectensis] >gi|156221761|gb|EDO42612.1| predicted protein [Nematostella vectensis]	--	--	--	--	sp|Q3ZCB2|PLAC8_BOVIN	81.6	1e-15	Placenta-specific gene 8 protein OS=Bos taurus GN=PLAC8 PE=3 SV=1	--	--	--	--	--	--	--	--	--	--	-	-	-	--
Unigene14131_sinensis	602	0	13	0.0000	4.6469	12.1820528834474	Up	3.24104e-05	0.000472088680242526	--	--	--	--	--	--	--	--	--	--	--	--	--	--	--	--	--	--	--	--	--	--	-	-	-	--
Unigene4561_sinensis	2330	0	49	0.0000	4.5254	12.1438296022749	Up	1.558306e-17	6.5837247249242e-16	gi|260837282|ref|XP_002613634.1|	135.2	1e-29	hypothetical protein BRAFLDRAFT_93675 [Branchiostoma floridae] >gi|229299020|gb|EEN69643.1| hypothetical protein BRAFLDRAFT_93675 [Branchiostoma floridae]	--	--	--	--	sp|Q5VU97|CAHD1_HUMAN	108	5e-23	VWFA and cache domain-containing protein 1 OS=Homo sapiens GN=CACHD1 PE=2 SV=2	--	--	--	--	--	K10955	2e-07	58.9	tgu:100220116	intestinal mucin-2	-	-	-	--
Unigene10911_sinensis	861	0	18	0.0000	4.4987	12.1352924473241	Up	6.30734e-07	1.21054013900826e-05	--	--	--	--	--	--	--	--	--	--	--	--	--	--	--	--	--	--	--	--	--	--	-	-	-	--
Unigene3356_sinensis	576	0	12	0.0000	4.4831	12.130280965156	Up	7.1261e-05	0.000964952888046647	gi|110347847|gb|ABG72725.1|	60.8	4e-08	protease inhibitor-like protein [Antheraea mylitta]	--	--	--	--	--	--	--	--	--	--	--	--	--	--	--	--	--	--	-	-	-	--
CL8671.Contig2_sinensis	1443	0	30	0.0000	4.4737	12.1272527992121	Up	4.94124e-11	1.47494108637532e-09	gi|260830778|ref|XP_002610337.1|	143.3	3e-32	hypothetical protein BRAFLDRAFT_209314 [Branchiostoma floridae] >gi|229295702|gb|EEN66347.1| hypothetical protein BRAFLDRAFT_209314 [Branchiostoma floridae]	--	--	--	--	sp|P04634|LIPG_RAT	122	2e-27	Gastric triacylglycerol lipase OS=Rattus norvegicus GN=Lipf PE=2 SV=1	--	--	--	--	--	K01052	1e-31	138	bfo:BRAFLDRAFT_72470	lysosomal acid lipase/cholesteryl ester hydrolase [EC:3.1.1.13]	-	-	-	--
Unigene23409_sinensis	674	0	14	0.0000	4.4697	12.1259622876508	Up	1.474066e-05	0.000229080312634397	--	--	--	--	--	--	--	--	--	--	--	--	--	--	--	--	--	--	--	--	--	--	-	-	-	--
Unigene14234_sinensis	674	0	14	0.0000	4.4697	12.1259622876508	Up	1.474066e-05	0.000228774123755848	gi|307166290|gb|EFN60481.1|	21.9	2e-07	hypothetical protein EAG_10563 [Camponotus floridanus]	--	--	--	--	--	--	--	--	--	--	--	--	--	--	--	--	--	--	-	-	-	--
CL8117.Contig2_sinensis	725	0	15	0.0000	4.4521	12.120270282527	Up	6.70424e-06	0.000110185821316348	gi|113373879|dbj|BAF03560.1|	76.6	1e-12	clam ADP-ribosylating protein CARP-1 [Meretrix lamarckii]	--	--	--	--	--	--	--	--	--	--	--	--	--	--	--	--	--	--	-	-	-	--
Unigene39337_sinensis	1503	0	31	0.0000	4.4383	12.115791472225	Up	2.24734e-11	6.88522121635884e-10	gi|405971051|gb|EKC35907.1|	158.3	1e-36	hypothetical protein CGI_10024315, partial [Crassostrea gigas]	--	--	--	--	sp|P46063|RECQ1_HUMAN	120	8e-27	ATP-dependent DNA helicase Q1 OS=Homo sapiens GN=RECQL PE=1 SV=3	PM1427	127	5e-29	COG0514	Superfamily II DNA helicase	K10900	2e-29	131	cqu:CpipJ_CPIJ007658	werner syndrome ATP-dependent helicase [EC:3.6.4.12]	-	-	-	--
Unigene872_sinensis	679	0	14	0.0000	4.4368	12.1153038061521	Up	1.474066e-05	0.000228825098382353	--	--	--	--	--	--	--	--	--	--	--	--	--	--	--	--	--	--	--	--	--	--	-	-	-	--
Unigene19811_sinensis	1459	0	30	0.0000	4.4247	12.1113639267087	Up	4.94124e-11	1.47557329429919e-09	gi|470512120|ref|XP_004352102.1|	57.0	3e-06	PHDfinger domain containing protein [Acanthamoeba castellanii str. Neff] >gi|440802023|gb|ELR22963.1| PHDfinger domain containing protein [Acanthamoeba castellanii str. Neff]	--	--	--	--	--	--	--	--	--	--	--	--	--	K13179	5e-06	53.1	api:100167834	ATP-dependent RNA helicase DDX18/HAS1 [EC:3.6.4.13]	-	-	-	--
Unigene21508_sinensis	592	0	12	0.0000	4.3619	12.0907409800975	Up	7.1261e-05	0.000965140476088647	gi|405966416|gb|EKC31703.1|	62.0	1e-08	Sacsin [Crassostrea gigas]	--	--	--	--	sp|Q9NZJ4|SACS_HUMAN	185	7e-47	Sacsin OS=Homo sapiens GN=SACS PE=1 SV=2	--	--	--	--	--	--	--	--	--	--	-	-	-	--
Unigene14291_sinensis	600	0	12	0.0000	4.3037	12.0713617994533	Up	7.1261e-05	0.000963454804773918	--	--	--	--	--	--	--	--	--	--	--	--	--	--	--	--	--	--	--	--	--	--	-	-	-	--
Unigene24477_sinensis	903	0	18	0.0000	4.2894	12.0665601427452	Up	6.30734e-07	1.21020674871936e-05	--	--	--	--	--	--	--	--	--	--	--	--	--	--	--	--	--	--	--	--	--	--	-	-	-	--
Unigene14224_sinensis	858	0	17	0.0000	4.2636	12.057856379165	Up	1.386802e-06	2.53588211385827e-05	--	--	--	--	--	--	--	--	--	--	--	--	--	--	--	--	--	--	--	--	--	--	-	-	-	--
Unigene11485_sinensis	974	0	19	0.0000	4.1977	12.0353833488677	Up	2.86866e-07	5.76454206922411e-06	--	--	--	--	--	--	--	--	--	--	--	--	--	--	--	--	--	--	--	--	--	--	-	-	-	--
Unigene30146_sinensis	770	0	15	0.0000	4.1919	12.0333885856918	Up	6.70424e-06	0.000110107896407355	gi|66816705|ref|XP_642362.1|	56.6	1e-06	hypothetical protein DDB_G0278431 [Dictyostelium discoideum AX4] >gi|60470408|gb|EAL68388.1| hypothetical protein DDB_G0278431 [Dictyostelium discoideum AX4]	--	--	--	--	--	--	--	--	--	--	--	--	--	--	--	--	--	--	-	-	-	--
Unigene39470_sinensis	617	0	12	0.0000	4.1852	12.0310808517899	Up	7.1261e-05	0.000964203264517382	gi|405960594|gb|EKC26506.1|	96.3	1e-18	hypothetical protein CGI_10002601 [Crassostrea gigas]	--	--	--	--	--	--	--	--	--	--	--	--	--	K00854	2e-11	69.3	spu:589304	xylulokinase [EC:2.7.1.17]	-	-	-	--
Unigene7524_sinensis	1235	0	24	0.0000	4.1818	12.029908349481	Up	5.58266e-09	1.37336984300847e-07	gi|7510771|pir||T29919	55.5	7e-06	hypothetical protein ZC449.5 - Caenorhabditis elegans	--	--	--	--	--	--	--	--	--	--	--	--	--	--	--	--	--	--	-	-	-	--
Unigene21675_sinensis	626	0	12	0.0000	4.1250	12.0101784040205	Up	7.1261e-05	0.000964577930639207	gi|307176689|gb|EFN66122.1|	119.0	1e-25	hypothetical protein EAG_10643 [Camponotus floridanus]	--	--	--	--	--	--	--	--	--	--	--	--	--	K10592	2e-06	52.8	xtr:100489531	E3 ubiquitin-protein ligase HUWE1 [EC:6.3.2.19]	-	-	-	--
Unigene27194_sinensis	1061	0	20	0.0000	4.0563	11.9859486412703	Up	1.304702e-07	2.74199950642534e-06	--	--	--	--	--	--	--	--	--	--	--	--	--	--	--	--	--	--	--	--	--	--	-	-	-	--
Unigene39405_sinensis	1117	0	21	0.0000	4.0456	11.9821379682399	Up	5.93396e-08	1.30537751575624e-06	--	--	--	--	--	--	--	--	--	--	--	--	--	--	--	--	--	--	--	--	--	--	-	-	-	--
CL9320.Contig1_sinensis	1144	0	21	0.0000	3.9501	11.9476734614146	Up	5.93396e-08	1.30661523147914e-06	gi|281210256|gb|EFA84423.1|	67.4	1e-09	hypothetical protein PPL_02455 [Polysphondylium pallidum PN500]	--	--	--	--	sp|P98088|MUC5A_HUMAN	51.2	4e-06	Mucin-5AC (Fragments) OS=Homo sapiens GN=MUC5AC PE=1 SV=3	--	--	--	--	--	K13908	2e-06	53.9	bta:789503	mucin-5B	-	-	-	--
Unigene39497_sinensis	711	0	13	0.0000	3.9345	11.9419645929861	Up	3.24104e-05	0.00047169420463756	gi|405966566|gb|EKC31836.1|	272.7	1e-71	hypothetical protein CGI_10017419 [Crassostrea gigas]	--	--	--	--	--	--	--	--	--	--	--	--	--	--	--	--	--	--	-	-	-	--
CL3619.Contig1_sinensis	717	0	13	0.0000	3.9016	11.9298501621485	Up	3.24104e-05	0.000471989999498328	gi|157285980|gb|ABV31711.1|	36.6	1e-17	transposase [Salmo salar]	--	--	--	--	sp|P34257|TC3A_CAEEL	57.8	2e-08	Transposable element Tc3 transposase OS=Caenorhabditis elegans GN=tc3a PE=1 SV=1	--	--	--	--	--	K00507	1e-07	57.0	tca:658695	stearoyl-CoA desaturase (delta-9 desaturase) [EC:1.14.19.1]	-	-	-	--
CL2070.Contig1_sinensis	4027	0	73	0.0000	3.9008	11.9295543157328	Up	9.56382e-26	5.48396523111111e-24	gi|405967923|gb|EKC33039.1|	62.8	1e-07	Usherin [Crassostrea gigas]	--	--	--	--	sp|O75445|USH2A_HUMAN	954	0.0	Usherin OS=Homo sapiens GN=USH2A PE=1 SV=3	--	--	--	--	--	K06252	2e-42	175	bfo:BRAFLDRAFT_124749	tenascin	-	-	-	--
Unigene3614_sinensis	1331	0	24	0.0000	3.8801	11.9218781194572	Up	5.58266e-09	1.37434042240283e-07	gi|405955306|gb|EKC22471.1|	112.8	4e-23	Sacsin [Crassostrea gigas]	--	--	--	--	sp|Q9NZJ4|SACS_HUMAN	79.0	2e-14	Sacsin OS=Homo sapiens GN=SACS PE=1 SV=2	--	--	--	--	--	--	--	--	--	--	-	-	-	--
Unigene3188_sinensis	666	0	12	0.0000	3.8772	11.9207994410992	Up	7.1261e-05	0.000963081010475267	--	--	--	--	--	--	--	--	--	--	--	--	--	--	--	--	--	--	--	--	--	--	-	-	-	--
CL435.Contig2_sinensis	787	0	14	0.0000	3.8280	11.902375114486	Up	1.474066e-05	0.000229387322211302	gi|335309074|ref|XP_003361483.1|	80.5	9e-14	PREDICTED: SAM domain and HD domain-containing protein 1-like, partial [Sus scrofa]	--	--	--	--	sp|Q5ZJL9|SAMH1_CHICK	78.6	1e-14	SAM domain and HD domain-containing protein 1 OS=Gallus gallus GN=SAMHD1 PE=2 SV=1	--	--	--	--	--	--	--	--	--	--	GO:0006952//defense response;GO:0002376//immune system process	GO:0005488//binding	-	--
Unigene30244_sinensis	2259	0	40	0.0000	3.8103	11.8956888759433	Up	1.871374e-14	6.77281845225974e-13	gi|405967923|gb|EKC33039.1|	56.2	8e-06	Usherin [Crassostrea gigas]	--	--	--	--	sp|O75445|USH2A_HUMAN	538	3e-152	Usherin OS=Homo sapiens GN=USH2A PE=1 SV=3	--	--	--	--	--	K06252	1e-38	162	bfo:BRAFLDRAFT_124749	tenascin	-	-	-	--
CL2416.Contig3_sinensis	1143	0	20	0.0000	3.7653	11.8785491007598	Up	1.304702e-07	2.73869489719795e-06	gi|48526360|gb|AAT45385.1|	184.9	6e-45	sperm nuclear basic protein PL-I isoform PLIb [Spisula solidissima]	--	--	--	--	sp|Q8VE97|SRSF4_MOUSE	119	1e-26	Serine/arginine-rich splicing factor 4 OS=Mus musculus GN=Srsf4 PE=2 SV=1	NMB0700	58.9	2e-08	COG3468	Type V secretory pathway, adhesin AidA	K13172	4e-31	136	dmo:Dmoj_GI16794	serine/arginine repetitive matrix protein 2	-	-	-	--
Unigene25319_sinensis	3734	0	65	0.0000	3.7459	11.8710966707807	Up	5.22362e-23	2.75075118503401e-21	gi|156359821|ref|XP_001624963.1|	398.7	1e-108	predicted protein [Nematostella vectensis] >gi|156211771|gb|EDO32863.1| predicted protein [Nematostella vectensis]	--	--	--	--	sp|Q9NZJ4|SACS_HUMAN	279	3e-74	Sacsin OS=Homo sapiens GN=SACS PE=1 SV=2	APE1272	53.5	3e-06	COG2250	Uncharacterized conserved protein related to C-terminal domain of eukaryotic chaperone, SACSIN	--	--	--	--	--	-	-	-	--
Unigene26142_sinensis	750	0	13	0.0000	3.7299	11.8649212364729	Up	3.24104e-05	0.000471103725766743	gi|405956006|gb|EKC22872.1|	321.6	2e-86	hypothetical protein CGI_10001342 [Crassostrea gigas]	--	--	--	--	sp|Q8CJ12|GPR64_MOUSE	166	5e-41	G-protein coupled receptor 64 OS=Mus musculus GN=Gpr64 PE=2 SV=1	--	--	--	--	--	K08451	2e-40	166	mmu:237175	G protein-coupled receptor 64	-	-	-	--
Unigene17899_sinensis	1217	0	21	0.0000	3.7132	11.8584473082408	Up	5.93396e-08	1.30496546477273e-06	gi|405953098|gb|EKC20821.1|	503.1	1e-140	Putative tubulin polyglutamylase TTLL2 [Crassostrea gigas]	--	--	--	--	sp|Q9BWV7|TTLL2_HUMAN	363	3e-100	Probable tubulin polyglutamylase TTLL2 OS=Homo sapiens GN=TTLL2 PE=5 SV=3	--	--	--	--	--	K00273	2e-42	174	ame:551507	D-amino-acid oxidase [EC:1.4.3.3]	GO:0006464//cellular protein modification process	GO:0004835//tubulin-tyrosine ligase activity	-	--
Unigene30385_sinensis	815	0	14	0.0000	3.6965	11.8519441979995	Up	1.474066e-05	0.000229029224250669	--	--	--	--	gi|354784875|gb|JN949376.1|	61.9	4e-06	Mus musculus targeted KO-first, conditional ready, lacZ-tagged mutant allele Timm44:tm1a(EUCOMM)Wtsi; transgenic	--	--	--	--	--	--	--	--	--	--	--	--	--	--	-	-	-	--
CL1784.Contig2_sinensis	4049	0	69	0.0000	3.6670	11.8403845507117	Up	2.23512e-24	1.23586170857143e-22	gi|405967923|gb|EKC33039.1|	100.9	6e-19	Usherin [Crassostrea gigas]	--	--	--	--	sp|O75445|USH2A_HUMAN	635	0.0	Usherin OS=Homo sapiens GN=USH2A PE=1 SV=3	Cj1279c	65.9	6e-10	COG3401	Fibronectin type 3 domain-containing protein	K06252	5e-54	214	bfo:BRAFLDRAFT_124749	tenascin	-	-	-	--
Unigene25861_sinensis	764	0	13	0.0000	3.6616	11.8382584817133	Up	3.24104e-05	0.00047071089380863	gi|348512599|ref|XP_003443830.1|	320.1	6e-86	PREDICTED: atrial natriuretic peptide receptor 1-like [Oreochromis niloticus]	gi|170046338|ref|XM_001850674.1|	69.9	2e-08	Culex quinquefasciatus atrial natriuretic peptide receptor, mRNA	sp|P18293|ANPRA_MOUSE	313	3e-85	Atrial natriuretic peptide receptor 1 OS=Mus musculus GN=Npr1 PE=2 SV=2	all0661	165	7e-41	COG2114	Adenylate cyclase, family 3 (some proteins contain HAMP domain)	K12324	1e-85	316	xla:399350	atrial natriuretic peptide receptor B [EC:4.6.1.2]	GO:0016525//negative regulation of angiogenesis;GO:0048662//negative regulation of smooth muscle cell proliferation;GO:0042312//regulation of vasodilation;GO:0007589//body fluid secretion;GO:0035810//positive regulation of urine volume;GO:0042417//dopamine metabolic process;GO:0030828//positive regulation of cGMP biosynthetic process;GO:0006468//protein phosphorylation;GO:0030308//negative regula…	GO:0004383//guanylate cyclase activity;GO:0017046//peptide hormone binding;GO:0016941//natriuretic peptide receptor activity;GO:0019901//protein kinase binding;GO:0004672//protein kinase activity;GO:0005525//GTP binding;GO:0008528//G-protein coupled peptide receptor activity;GO:0005524//ATP binding	GO:0005887//integral to plasma membrane	--
CL8189.Contig2_sinensis	1536	0	26	0.0000	3.6425	11.8307132569519	Up	1.154798e-09	3.05326838185958e-08	gi|405957841|gb|EKC24021.1|	318.5	5e-85	von Willebrand factor A domain-containing protein 3B [Crassostrea gigas]	--	--	--	--	sp|Q07283|TRHY_HUMAN	77.0	1e-13	Trichohyalin OS=Homo sapiens GN=TCHH PE=1 SV=2	VC1837	53.9	7e-07	COG3064	Membrane protein involved in colicin uptake	K13163	5e-13	76.6	dvi:Dvir_GJ20452	male-specific lethal 1	-	GO:0005488//binding	GO:0005856//cytoskeleton	--
Unigene39585_sinensis	1132	0	19	0.0000	3.6118	11.8185022918228	Up	2.86866e-07	5.75955831527377e-06	gi|405978740|gb|EKC43104.1|	107.1	1e-21	hypothetical protein CGI_10022307 [Crassostrea gigas]	--	--	--	--	--	--	--	--	--	--	--	--	--	--	--	--	--	--	-	-	-	--
CL10235.Contig1_sinensis	716	0	12	0.0000	3.6065	11.8163837084747	Up	7.1261e-05	0.000961216381219748	--	--	--	--	--	--	--	--	--	--	--	--	--	--	--	--	--	--	--	--	--	--	-	-	-	--
CL1612.Contig2_sinensis	1023	0	17	0.0000	3.5759	11.8040906767982	Up	1.386802e-06	2.53988192791798e-05	--	--	--	--	--	--	--	--	--	--	--	--	--	--	--	--	--	--	--	--	--	--	-	-	-	--
Unigene39891_sinensis	846	0	14	0.0000	3.5610	11.7980667203631	Up	1.474066e-05	0.000229131423815261	--	--	--	--	gi|22758918|gb|AF532989.1|	99.6	2e-17	Mus musculus phosphoinositide 3 kinase P110delta (Pik3cd) gene, complete cds	--	--	--	--	--	--	--	--	--	--	--	--	--	--	-	-	-	--
Unigene37984_sinensis	802	0	13	0.0000	3.4881	11.7682256858538	Up	3.24104e-05	0.000471005456320401	gi|466305537|gb|EMP42701.1|	54.7	6e-06	hypothetical protein UY3_00024 [Chelonia mydas]	--	--	--	--	sp|Q8IDX6|RBP2A_PLAF7	61.2	2e-09	Reticulocyte-binding protein 2 homolog a OS=Plasmodium falciparum (isolate 3D7) GN=PF13_0198 PE=3 SV=1	aq_629	56.6	5e-08	COG1196	Chromosome segregation ATPases	K11423	1e-09	64.3	dgr:Dgri_GH16034	histone-lysine N-methyltransferase SETD2 [EC:2.1.1.43]	-	-	-	--
Unigene25124_sinensis	771	0	12	0.0000	3.3492	11.7096008148999	Up	7.1261e-05	0.000963267871362049	gi|405951551|gb|EKC19454.1|	288.1	2e-76	Protein tiptop [Crassostrea gigas]	--	--	--	--	sp|Q9U3V5|TIPT_DROME	118	2e-26	Protein tiptop OS=Drosophila melanogaster GN=tio PE=2 SV=2	--	--	--	--	--	K09236	2e-18	92.8	dya:Dyak_GE12928	teashirt	GO:0009888//tissue development;GO:0006355//regulation of transcription, DNA-dependent;GO:0048513//organ development;GO:0009790//embryo development;GO:0000070//mitotic sister chromatid segregation;GO:0030154//cell differentiation;GO:0048477//oogenesis;GO:0048610//cellular process involved in reproduction	GO:0005488//binding	GO:0044446//intracellular organelle part;GO:0043232	--
Unigene22341_sinensis	980	0	14	0.0000	3.0741	11.5859483811018	Up	1.474066e-05	0.000228927115813642	gi|405970363|gb|EKC35275.1|	350.1	9e-95	T-box transcription factor TBX1 [Crassostrea gigas]	gi|92097753|gb|BC115243.1|	87.7	9e-14	Danio rerio T-box 1, mRNA (cDNA clone MGC:136724 IMAGE:7999197), complete cds	sp|O43435|TBX1_HUMAN	234	3e-61	T-box transcription factor TBX1 OS=Homo sapiens GN=TBX1 PE=1 SV=1	--	--	--	--	--	K10175	6e-61	234	mdo:100029670	T-box protein 1	-	-	-	--
CL8617.Contig2_sinensis	1411	0	20	0.0000	3.0501	11.5746408280389	Up	1.304702e-07	2.7428269051901e-06	gi|405950672|gb|EKC18644.1|	426.0	2e-117	Sialate O-acetylesterase [Crassostrea gigas]	--	--	--	--	sp|P70665|SIAE_MOUSE	367	5e-101	Sialate O-acetylesterase OS=Mus musculus GN=Siae PE=2 SV=3	--	--	--	--	--	K05970	2e-107	389	bfo:BRAFLDRAFT_217332	sialate O-acetylesterase [EC:3.1.1.53]	-	-	-	--
Unigene13692_sinensis	919	0	13	0.0000	3.0440	11.5717526435035	Up	3.24104e-05	0.000472286165572056	--	--	--	--	--	--	--	--	--	--	--	--	--	--	--	--	--	--	--	--	--	--	-	-	-	--
Unigene39948_sinensis	854	0	12	0.0000	3.0237	11.5620992926131	Up	7.1261e-05	0.000962147792441861	gi|405955306|gb|EKC22471.1|	85.9	2e-15	Sacsin [Crassostrea gigas]	--	--	--	--	sp|Q9NZJ4|SACS_HUMAN	66.2	8e-11	Sacsin OS=Homo sapiens GN=SACS PE=1 SV=2	--	--	--	--	--	--	--	--	--	--	-	-	-	--
Unigene843_sinensis	999	0	14	0.0000	3.0156	11.5582293617144	Up	1.474066e-05	0.000229182557808525	gi|115676939|ref|XP_001186509.1|	379.8	1e-103	PREDICTED: uncharacterized protein LOC754648 [Strongylocentrotus purpuratus]	--	--	--	--	sp|P10394|POL4_DROME	95.5	2e-19	Retrovirus-related Pol polyprotein from transposon 412 OS=Drosophila melanogaster GN=POL PE=4 SV=1	YGR109w-b_2	85.1	2e-16	COG2801	Transposase and inactivated derivatives	K04228	1e-27	124	dre:100151502	arginine vasopressin receptor 2	-	-	-	--
Unigene39527_sinensis	1153	0	16	0.0000	2.9861	11.5440467646317	Up	3.04918e-06	5.30552750799201e-05	gi|405965461|gb|EKC30834.1|	90.5	1e-16	hypothetical protein CGI_10009718 [Crassostrea gigas]	--	--	--	--	sp|P79385|MFGM_PIG	54.7	4e-07	Lactadherin OS=Sus scrofa GN=MFGE8 PE=1 SV=2	--	--	--	--	--	K03899	5e-09	62.8	mgp:100539449	coagulation factor VIII	-	-	-	--
Unigene30518_sinensis	1089	0	15	0.0000	2.9640	11.5333297323058	Up	6.70424e-06	0.00011015983409434	gi|340373493|ref|XP_003385276.1|	69.3	3e-10	PREDICTED: HSPB1-associated protein 1-like [Amphimedon queenslandica]	--	--	--	--	sp|Q5BKC6|HBAP1_RAT	55.8	2e-07	HSPB1-associated protein 1 OS=Rattus norvegicus GN=Hspbap1 PE=1 SV=1	--	--	--	--	--	--	--	--	--	--	-	-	-	--
Unigene17753_sinensis	1100	0	15	0.0000	2.9344	11.5188498287077	Up	6.70424e-06	0.000110237832560774	gi|405966114|gb|EKC31434.1|	243.4	1e-62	Neurogenic locus notch-like protein 1 [Crassostrea gigas]	--	--	--	--	sp|P46531|NOTC1_HUMAN	295	1e-79	Neurogenic locus notch homolog protein 1 OS=Homo sapiens GN=NOTCH1 PE=1 SV=4	--	--	--	--	--	K02599	4e-79	295	hsa:4851	Notch	-	-	-	--
Unigene13800_sinensis	959	0	13	0.0000	2.9170	11.5102696708982	Up	3.24104e-05	0.000471398780292276	gi|405967923|gb|EKC33039.1|	166.8	1e-94	Usherin [Crassostrea gigas]	--	--	--	--	sp|O75445|USH2A_HUMAN	136	2e-45	Usherin OS=Homo sapiens GN=USH2A PE=1 SV=3	--	--	--	--	--	K05637	2e-16	54.3	acs:100565785	laminin, alpha 1/2	-	-	-	--
Unigene39783_sinensis	1716	0	23	0.0000	2.8842	11.4939554939717	Up	1.227464e-08	2.90772490363822e-07	gi|405971768|gb|EKC36581.1|	214.2	1e-53	hypothetical protein CGI_10018168 [Crassostrea gigas]	--	--	--	--	sp|Q75JC9|Y8484_DICDI	74.7	6e-13	Uncharacterized protein DDB_G0271670 OS=Dictyostelium discoideum GN=DDB_G0271670 PE=4 SV=1	--	--	--	--	--	K06568	6e-09	63.2	cfa:448784	mucin 1, transmembrane	GO:0044260;GO:0006139//nucleobase-containing compound metabolic process	GO:0003824//catalytic activity	-	--
CL5552.Contig2_sinensis	964	0	12	0.0000	2.6787	11.3873173008004	Up	7.1261e-05	0.000963828889341875	gi|405969741|gb|EKC34694.1|	214.2	8e-54	hypothetical protein CGI_10026831 [Crassostrea gigas]	--	--	--	--	--	--	--	--	--	--	--	--	--	--	--	--	--	--	-	-	-	--
CL1784.Contig1_sinensis	2816	0	35	0.0000	2.6745	11.3850534883462	Up	9.61608e-13	3.17357971350071e-11	gi|405967923|gb|EKC33039.1|	100.9	4e-19	Usherin [Crassostrea gigas]	--	--	--	--	sp|O75445|USH2A_HUMAN	573	7e-163	Usherin OS=Homo sapiens GN=USH2A PE=1 SV=3	Cj1279c	65.9	4e-10	COG3401	Fibronectin type 3 domain-containing protein	K06252	3e-54	214	bfo:BRAFLDRAFT_124749	tenascin	-	-	-	--
CL5226.Contig1_sinensis	1132	0	14	0.0000	2.6613	11.3779154346753	Up	1.474066e-05	0.00022867224260521	gi|17537423|ref|NP_496097.1|	57.4	1e-06	Protein CUTL-2 [Caenorhabditis elegans] >gi|3881131|emb|CAB16488.1| Protein CUTL-2 [Caenorhabditis elegans]	--	--	--	--	--	--	--	--	--	--	--	--	--	--	--	--	--	--	-	-	-	--
Unigene18774_sinensis	1239	0	15	0.0000	2.6052	11.3471784164489	Up	6.70424e-06	0.000109926499543422	gi|405955063|gb|EKC22317.1|	60.8	1e-07	hypothetical protein CGI_10002468 [Crassostrea gigas]	--	--	--	--	--	--	--	--	--	--	--	--	--	--	--	--	--	--	-	-	-	--
Unigene38034_sinensis	1410	0	16	0.0000	2.4418	11.2537293233066	Up	3.04918e-06	5.30950565908523e-05	gi|449692542|ref|XP_002169358.2|	246.5	2e-63	PREDICTED: uncharacterized protein LOC100214006, partial [Hydra magnipapillata]	--	--	--	--	--	--	--	--	--	--	--	--	--	--	--	--	--	--	-	-	-	--
Unigene17113_sinensis	1237	0	14	0.0000	2.4354	11.2499430305315	Up	1.474066e-05	0.000228723171835189	gi|115665280|ref|XP_001200196.1|	95.5	6e-18	PREDICTED: sacsin-like [Strongylocentrotus purpuratus]	--	--	--	--	sp|Q9NZJ4|SACS_HUMAN	84.7	4e-16	Sacsin OS=Homo sapiens GN=SACS PE=1 SV=2	--	--	--	--	--	--	--	--	--	--	-	-	GO:0044464//cell part	--
CL7852.Contig2_sinensis	1170	0	12	0.0000	2.2070	11.1078709142796	Up	7.1261e-05	0.000964390561188811	gi|405960879|gb|EKC26753.1|	280.0	1e-73	hypothetical protein CGI_10028292 [Crassostrea gigas]	--	--	--	--	--	--	--	--	--	--	--	--	--	--	--	--	--	--	-	-	-	--
CL7214.Contig1_sinensis	1589	0	16	0.0000	2.1668	11.0813502805837	Up	3.04918e-06	5.3148191498624e-05	gi|405952271|gb|EKC20103.1|	330.1	2e-88	hypothetical protein CGI_10006853 [Crassostrea gigas]	--	--	--	--	sp|Q8IDX6|RBP2A_PLAF7	77.4	8e-14	Reticulocyte-binding protein 2 homolog a OS=Plasmodium falciparum (isolate 3D7) GN=PF13_0198 PE=3 SV=1	aq_629	55.5	3e-07	COG1196	Chromosome segregation ATPases	K06084	2e-11	71.6	spu:591791	F-box protein 20	-	-	-	--
Unigene10205_sinensis	1375	0	13	0.0000	2.0345	10.9904585650737	Up	3.24104e-05	0.000472384970209205	gi|401412129|ref|XP_003885512.1|	56.2	4e-06	conserved hypothetical protein [Neospora caninum Liverpool] >gi|325119931|emb|CBZ55484.1| conserved hypothetical protein [Neospora caninum Liverpool]	gi|193810592|emb|AM910995.1|	61.9	8e-06	Plasmodium knowlesi strain H chromosome 13, complete genome	sp|Q869E1|DNLI1_DICDI	71.6	4e-12	DNA ligase 1 OS=Dictyostelium discoideum GN=lig1 PE=3 SV=1	--	--	--	--	--	K09880	8e-12	72.4	aga:AgaP_AGAP003331	enolase-phosphatase E1 [EC:3.1.3.77]	-	-	-	--
CL350.Contig5_sinensis	1548	0	13	0.0000	1.8071	10.8194606278941	Up	3.24104e-05	0.000470809040366972	gi|390358424|ref|XP_788723.3|	223.8	2e-56	PREDICTED: uncharacterized protein LOC583735 [Strongylocentrotus purpuratus]	--	--	--	--	sp|Q4KM91|CDCA7_RAT	205	2e-52	Cell division cycle-associated protein 7 OS=Rattus norvegicus GN=Cdca7 PE=2 SV=1	--	--	--	--	--	--	--	--	--	--	-	-	-	--
CL8617.Contig1_sinensis	1575	0	13	0.0000	1.7761	10.7944970968921	Up	3.24104e-05	0.000471202036227045	gi|405950672|gb|EKC18644.1|	96.3	5e-18	Sialate O-acetylesterase [Crassostrea gigas]	--	--	--	--	sp|P70665|SIAE_MOUSE	291	4e-78	Sialate O-acetylesterase OS=Mus musculus GN=Siae PE=2 SV=3	--	--	--	--	--	K05970	2e-85	317	bfo:BRAFLDRAFT_217332	sialate O-acetylesterase [EC:3.1.1.53]	-	-	-	--
CL1407.Contig1_sinensis	2541	0	17	0.0000	1.4397	10.49155250355	Up	1.386802e-06	2.53654787445524e-05	gi|328716663|ref|XP_001943426.2|	289.7	5e-76	PREDICTED: hypothetical protein LOC100161732 [Acyrthosiphon pisum]	--	--	--	--	sp|C6KTD2|HKNMT_PLAF7	52.8	4e-06	Putative histone-lysine N-methyltransferase PFF1440w OS=Plasmodium falciparum (isolate 3D7) GN=PFF1440w PE=3 SV=1	--	--	--	--	--	K14575	3e-14	81.6	hmg:100204390	AAA family ATPase	-	-	-	--
CL3308.Contig2_sinensis	2343	0	12	0.0000	1.1021	10.106039418697	Up	7.1261e-05	0.000964016040582524	gi|405958557|gb|EKC24673.1|	342.8	4e-92	Coiled-coil domain-containing protein 66 [Crassostrea gigas]	--	--	--	--	sp|Q54QQ2|Y5634_DICDI	99.4	3e-20	Uncharacterized protein DDB_G0283697 OS=Dictyostelium discoideum GN=DDB_G0283697 PE=4 SV=1	SPAC56F8.03	62.4	3e-09	COG0532	Translation initiation factor 2 (IF-2; GTPase)	K10624	8e-19	96.7	aga:AgaP_AGAP011217	E3 ubiquitin-protein ligase RBBP6 [EC:6.3.2.19]	-	-	-	--
CL257.Contig3_sinensis	5057	0	20	0.0000	0.8510	9.73301532168596	Up	1.304702e-07	2.73952030253165e-06	gi|405968554|gb|EKC33617.1|	251.1	4e-64	hypothetical protein CGI_10016472 [Crassostrea gigas]	--	--	--	--	sp|Q9P1Z9|CI174_HUMAN	674	0.0	Uncharacterized protein C9orf174 OS=Homo sapiens GN=C9orf174 PE=2 SV=2	PAB0812	53.1	5e-06	COG0419	ATPase involved in DNA repair	K10352	3e-14	82.8	cqu:CpipJ_CPIJ015899	myosin heavy chain	-	-	-	--
CL257.Contig8_sinensis	5029	0	17	0.0000	0.7274	9.50660511556825	Up	1.386802e-06	2.53721398471639e-05	gi|405968554|gb|EKC33617.1|	249.6	1e-63	hypothetical protein CGI_10016472 [Crassostrea gigas]	--	--	--	--	sp|Q9P1Z9|CI174_HUMAN	676	0.0	Uncharacterized protein C9orf174 OS=Homo sapiens GN=C9orf174 PE=2 SV=2	PAB0812	53.1	5e-06	COG0419	ATPase involved in DNA repair	K10352	3e-14	82.8	cqu:CpipJ_CPIJ015899	myosin heavy chain	-	-	-	--
CL257.Contig7_sinensis	5129	0	14	0.0000	0.5874	9.19819945543749	Up	1.474066e-05	0.000229336096815543	gi|405968554|gb|EKC33617.1|	251.1	4e-64	hypothetical protein CGI_10016472 [Crassostrea gigas]	--	--	--	--	sp|Q9P1Z9|CI174_HUMAN	677	0.0	Uncharacterized protein C9orf174 OS=Homo sapiens GN=C9orf174 PE=2 SV=2	--	--	--	--	--	K10352	7e-15	84.7	aag:AaeL_AAEL001411	myosin heavy chain	-	-	-	--
Unigene39257_sinensis	1045	1	377	0.1718	77.6319	8.81977575049146	Up	1.896e-127	3.75262568181818e-125	--	--	--	--	--	--	--	--	--	--	--	--	--	--	--	--	--	--	--	--	--	--	-	-	-	--
Unigene8221_sinensis	2099	6	1012	0.5131	103.7488	7.65963890890258	Up	0	0	gi|405955538|gb|EKC22618.1|	173.3	4e-41	Interferon-induced protein 44-like protein [Crassostrea gigas]	--	--	--	--	sp|Q53G44|IF44L_HUMAN	129	2e-29	Interferon-induced protein 44-like OS=Homo sapiens GN=IFI44L PE=2 SV=3	--	--	--	--	--	--	--	--	--	--	-	-	-	--
CL8189.Contig1_sinensis	2864	1	107	0.0627	8.0394	7.00247858032509	Up	1.331124e-35	9.66021645375e-34	gi|405957841|gb|EKC24021.1|	325.5	1e-86	von Willebrand factor A domain-containing protein 3B [Crassostrea gigas]	--	--	--	--	sp|P37709|TRHY_RABIT	89.7	3e-17	Trichohyalin OS=Oryctolagus cuniculus GN=TCHH PE=2 SV=1	VC1837	53.9	1e-06	COG3064	Membrane protein involved in colicin uptake	K13163	5e-14	80.9	dvi:Dvir_GJ20452	male-specific lethal 1	-	-	-	--
CL712.Contig1_sinensis	1562	4	390	0.4597	53.7277	6.86882960343655	Up	2.90382e-126	5.65101216703911e-124	gi|342182678|emb|CCC92157.1|	79.0	8e-13	unnamed protein product [Trypanosoma congolense IL3000]	--	--	--	--	sp|Q9JL04|FMN2_MOUSE	67.8	6e-11	Formin-2 OS=Mus musculus GN=Fmn2 PE=1 SV=2	STM0960	52.8	2e-06	COG1674	DNA segregation ATPase FtsK/SpoIIIE and related proteins	K12826	7e-13	76.3	xla:379832	splicing factor 3A subunit 2	-	GO:0005488//binding	-	--
Unigene31999_sinensis	1850	1	81	0.0970	9.4217	6.60185883780039	Up	8.0031e-27	4.72916008396947e-25	gi|405951560|gb|EKC19463.1|	273.5	2e-71	G2/mitotic-specific cyclin-B [Crassostrea gigas]	--	--	--	--	sp|O93229|CCNB2_RANJA	186	2e-46	G2/mitotic-specific cyclin-B2 OS=Rana japonica GN=CCNB2 PE=2 SV=1	SPBC582.03	146	1e-34	COG5024	Cyclin	K05868	4e-44	180	ptr:453478	cyclin B	GO:0000278//mitotic cell cycle;GO:0022402//cell cycle process	GO:0005515//protein binding	GO:0015630//microtubule cytoskeleton	--
Unigene1048_sinensis	1148	1	79	0.1564	14.8081	6.56500222009084	Up	3.77666e-26	2.1926343795e-24	gi|260808688|ref|XP_002599139.1|	63.2	3e-08	hypothetical protein BRAFLDRAFT_122983 [Branchiostoma floridae] >gi|229284415|gb|EEN55151.1| hypothetical protein BRAFLDRAFT_122983 [Branchiostoma floridae]	--	--	--	--	--	--	--	--	--	--	--	--	--	--	--	--	--	--	-	-	-	--
Unigene35222_sinensis	571	1	62	0.3144	23.3653	6.2156225330588	Up	1.96257e-20	9.37150715078821e-19	gi|387158814|gb|AFJ54375.1|	57.0	5e-07	VERL [Tegula funebralis]	--	--	--	--	sp|A6QLS2|RSRC2_BOVIN	57.0	2e-08	Arginine/serine-rich coiled-coil protein 2 OS=Bos taurus GN=RSRC2 PE=2 SV=2	--	--	--	--	--	K13172	2e-06	52.8	oaa:100075123	serine/arginine repetitive matrix protein 2	-	-	-	--
CL7562.Contig1_sinensis	2461	1	52	0.0729	4.5468	5.96278892090293	Up	4.38276e-17	1.80676039313609e-15	gi|443695138|gb|ELT96105.1|	61.6	2e-07	hypothetical protein CAPTEDRAFT_195081 [Capitella teleta]	gi|345790412|ref|XM_534533.3|	71.9	1e-08	PREDICTED: Canis lupus familiaris spastic ataxia of Charlevoix-Saguenay (sacsin) (SACS), mRNA	sp|Q9JLC8|SACS_MOUSE	221	2e-90	Sacsin OS=Mus musculus GN=Sacs PE=1 SV=2	--	--	--	--	--	--	--	--	--	--	-	-	-	--
Unigene10736_sinensis	2065	2	90	0.1739	9.3786	5.75304274129465	Up	1.887952e-28	1.1639975919292e-26	gi|260809252|ref|XP_002599420.1|	278.9	7e-73	hypothetical protein BRAFLDRAFT_106563 [Branchiostoma floridae] >gi|229284698|gb|EEN55432.1| hypothetical protein BRAFLDRAFT_106563 [Branchiostoma floridae]	--	--	--	--	--	--	--	--	--	--	--	--	--	--	--	--	--	--	-	-	-	--
CL3769.Contig1_sinensis	1146	1	43	0.1566	8.0742	5.68816320544475	Up	4.3994e-14	1.56458294333844e-12	--	--	--	--	gi|309951145|gb|AC241551.6|	65.9	4e-07	Rattus norvegicus Y Chr BAC RNECO-246H16 (Amplicon Express Rat SHR-Akr (EcoR1 Digest) BAC library) complete sequence	--	--	--	--	--	--	--	--	--	--	--	--	--	--	-	-	-	--
Unigene33040_sinensis	1584	3	127	0.3400	17.2530	5.66516868697276	Up	1.928976e-39	1.50830335515152e-37	gi|170035826|ref|XP_001845768.1|	125.2	1e-26	three prime repair exonuclease 1 [Culex quinquefasciatus] >gi|167878205|gb|EDS41588.1| three prime repair exonuclease 1 [Culex quinquefasciatus]	--	--	--	--	sp|Q91XB0|TREX1_MOUSE	99.4	2e-20	Three prime repair exonuclease 1 OS=Mus musculus GN=Trex1 PE=1 SV=2	--	--	--	--	--	K14285	9e-26	119	tca:657794	NTF2-related export protein 1/2	-	-	-	--
Unigene34317_sinensis	1949	3	126	0.2763	13.9115	5.65389861370783	Up	4.14476e-39	3.20489771853496e-37	gi|405967547|gb|EKC32695.1|	462.6	3e-128	Interferon-induced protein 44-like protein [Crassostrea gigas]	--	--	--	--	sp|Q53G44|IF44L_HUMAN	188	4e-47	Interferon-induced protein 44-like OS=Homo sapiens GN=IFI44L PE=2 SV=3	--	--	--	--	--	--	--	--	--	--	-	-	-	--
Unigene25966_sinensis	827	1	42	0.2171	10.9285	5.65359186015919	Up	9.46196e-14	3.3059442890672e-12	--	--	--	--	--	--	--	--	--	--	--	--	--	--	--	--	--	--	--	--	--	--	-	-	-	--
Unigene5560_sinensis	1377	2	83	0.2607	12.9706	5.63671082488741	Up	4.0129e-26	2.32784954288093e-24	gi|405967545|gb|EKC32693.1|	398.7	3e-109	Interferon-induced protein 44-like protein [Crassostrea gigas]	--	--	--	--	sp|Q53G44|IF44L_HUMAN	197	5e-50	Interferon-induced protein 44-like OS=Homo sapiens GN=IFI44L PE=2 SV=3	--	--	--	--	--	--	--	--	--	--	-	-	-	--
CL6107.Contig1_sinensis	2141	2	78	0.1677	7.8396	5.54682545155796	Up	1.83015e-24	1.01516497093949e-22	gi|405958331|gb|EKC24467.1|	369.8	3e-100	Spermatogenesis-associated protein 7 [Crassostrea gigas]	gi|19263034|dbj|AP003064.2|	73.8	3e-09	Homo sapiens genomic DNA, chromosome 11q, clone:CTD-2531D15, complete sequence	sp|Q80VP2|SPAT7_MOUSE	119	4e-26	Spermatogenesis-associated protein 7 homolog OS=Mus musculus GN=Spata7 PE=2 SV=1	YML010w	53.1	2e-06	COG5164	Transcription elongation factor	K11853	1e-08	62.8	phu:Phum_PHUM227220	ubiquitin carboxyl-terminal hydrolase 34 [EC:3.1.2.15]	-	-	-	--
Unigene11338_sinensis	497	3	112	1.0836	48.4927	5.48386337927749	Up	1.816402e-34	1.29791703526154e-32	--	--	--	--	--	--	--	--	--	--	--	--	--	--	--	--	--	--	--	--	--	--	-	-	-	--
CL1407.Contig2_sinensis	3365	1	37	0.0533	2.3661	5.47223170530118	Up	4.31982e-12	1.37738004384439e-10	gi|328716663|ref|XP_001943426.2|	50.1	3e-97	PREDICTED: hypothetical protein LOC100161732 [Acyrthosiphon pisum]	--	--	--	--	sp|C6KTD2|HKNMT_PLAF7	52.8	5e-06	Putative histone-lysine N-methyltransferase PFF1440w OS=Plasmodium falciparum (isolate 3D7) GN=PFF1440w PE=3 SV=1	--	--	--	--	--	K14575	8e-18	87.4	hmg:100204390	AAA family ATPase	-	-	-	--
CL10211.Contig2_sinensis	718	1	37	0.2500	11.0890	5.4710573647973	Up	4.31982e-12	1.37674995233303e-10	gi|405969559|gb|EKC34523.1|	228.4	2e-58	Meiotic recombination protein SPO11 [Crassostrea gigas]	--	--	--	--	sp|Q9Y5K1|SPO11_HUMAN	182	6e-46	Meiotic recombination protein SPO11 OS=Homo sapiens GN=SPO11 PE=2 SV=1	PAB2411	67.8	2e-11	COG1697	DNA topoisomerase VI, subunit A	K10878	5e-50	197	spu:579828	meiotic recombination protein SPO11	GO:0007127//meiosis I	-	-	--
Unigene23811_sinensis	1335	1	36	0.1345	5.8028	5.43107112775349	Up	9.25958e-12	2.91507310899232e-10	gi|260783158|ref|XP_002586644.1|	419.1	2e-115	hypothetical protein BRAFLDRAFT_131171 [Branchiostoma floridae] >gi|229271765|gb|EEN42655.1| hypothetical protein BRAFLDRAFT_131171 [Branchiostoma floridae]	gi|426252748|ref|XM_004020016.1|	61.9	7e-06	PREDICTED: Ovis aries lipase, family member M (LIPM), mRNA	sp|Q4R4S5|LICH_MACFA	394	2e-109	Lysosomal acid lipase/cholesteryl ester hydrolase OS=Macaca fascicularis GN=LIPA PE=2 SV=1	SPBC16A3.12c	168	2e-41	COG0596	Predicted hydrolases or acyltransferases (alpha/beta hydrolase superfamily)	K01052	1e-111	403	bfo:BRAFLDRAFT_72470	lysosomal acid lipase/cholesteryl ester hydrolase [EC:3.1.1.13]	GO:0044707	GO:0016298//lipase activity;GO:0004771//sterol esterase activity	-	--
CL5796.Contig2_sinensis	2329	1	35	0.0771	3.2338	5.39035578521451	Up	1.983486e-11	6.10908426763926e-10	gi|405970708|gb|EKC35589.1|	97.4	3e-18	hypothetical protein CGI_10015988 [Crassostrea gigas]	--	--	--	--	--	--	--	--	--	--	--	--	--	--	--	--	--	--	-	-	-	--
CL6260.Contig2_sinensis	2766	3	104	0.1947	8.0909	5.37697540215168	Up	8.00442e-32	5.39322956460348e-30	gi|291233895|ref|XP_002736893.1|	186.4	7e-45	PREDICTED: hypothetical protein [Saccoglossus kowalevskii]	--	--	--	--	--	--	--	--	--	--	--	--	--	K13163	5e-39	164	bfo:BRAFLDRAFT_130981	male-specific lethal 1	-	-	-	--
Unigene2054_sinensis	355	1	34	0.5057	20.6094	5.3488769157197	Up	4.24584e-11	1.27172582527945e-09	--	--	--	--	--	--	--	--	--	--	--	--	--	--	--	--	--	--	--	--	--	--	-	-	-	--
Unigene2848_sinensis	1470	1	33	0.1221	4.8307	5.30609715471119	Up	9.08192e-11	2.64961593165829e-09	gi|405977049|gb|EKC41521.1|	70.9	2e-10	hypothetical protein CGI_10021404 [Crassostrea gigas]	--	--	--	--	--	--	--	--	--	--	--	--	--	--	--	--	--	--	-	-	-	--
CL4033.Contig2_sinensis	578	1	33	0.3106	12.2857	5.30577842025329	Up	9.08192e-11	2.64850684169108e-09	--	--	--	--	--	--	--	--	--	--	--	--	--	--	--	--	--	--	--	--	--	--	-	-	-	--
Unigene24475_sinensis	1330	1	33	0.1350	5.3392	5.30559227924413	Up	9.08192e-11	2.65072595090071e-09	gi|260830768|ref|XP_002610332.1|	180.6	1e-43	hypothetical protein BRAFLDRAFT_72482 [Branchiostoma floridae] >gi|229295697|gb|EEN66342.1| hypothetical protein BRAFLDRAFT_72482 [Branchiostoma floridae]	gi|281306722|ref|NG_016215.1|	61.9	7e-06	Homo sapiens Ca++-dependent secretion activator 2 (CADPS2), RefSeqGene on chromosome 7	--	--	--	--	--	--	--	--	--	--	--	--	--	--	-	-	-	--
Unigene4232_sinensis	2387	4	130	0.3008	11.7194	5.28395033252081	Up	3.5972e-39	2.78768995328142e-37	gi|405968230|gb|EKC33316.1|	306.2	5e-81	Serine/threonine-protein kinase CTR1 [Crassostrea gigas]	--	--	--	--	sp|Q54H45|DRKB_DICDI	145	3e-34	Probable serine/threonine-protein kinase drkB OS=Dictyostelium discoideum GN=drkB PE=3 SV=1	DR0058_1	88.6	4e-17	COG0515	Serine/threonine protein kinase	K04422	5e-26	120	bfo:BRAFLDRAFT_66872	mitogen-activated protein kinase kinase kinase 13 [EC:2.7.11.25]	-	GO:0016740//transferase activity	-	--
Unigene21756_sinensis	633	1	32	0.2836	10.8783	5.26145177507255	Up	1.941124e-10	5.50860154606925e-09	--	--	--	--	--	--	--	--	--	--	--	--	--	--	--	--	--	--	--	--	--	--	-	-	-	--
CL773.Contig2_sinensis	987	1	32	0.1819	6.9767	5.26132735059422	Up	1.941124e-10	5.50635863013029e-09	--	--	--	--	--	--	--	--	--	--	--	--	--	--	--	--	--	--	--	--	--	--	-	-	-	--
Unigene6372_sinensis	1417	2	63	0.2534	9.5672	5.2386083282258	Up	1.65185e-19	7.59120960751979e-18	gi|260811526|ref|XP_002600473.1|	102.1	7e-20	hypothetical protein BRAFLDRAFT_171338 [Branchiostoma floridae] >gi|229285760|gb|EEN56485.1| hypothetical protein BRAFLDRAFT_171338 [Branchiostoma floridae]	--	--	--	--	sp|Q9NWW9|HRSL2_HUMAN	94.7	4e-19	HRAS-like suppressor 2 OS=Homo sapiens GN=HRASLS2 PE=1 SV=1	--	--	--	--	--	K00678	3e-13	77.4	xtr:100485002	phosphatidylcholine-retinol O-acyltransferase [EC:2.3.1.135]	-	-	-	--
Unigene30383_sinensis	1232	1	31	0.1457	5.4146	5.21578198111144	Up	4.14544e-10	1.14515725360825e-08	gi|405962584|gb|EKC28247.1|	75.9	5e-12	Tenascin-X [Crassostrea gigas]	--	--	--	--	sp|Q6DIB5|MEG10_MOUSE	173	6e-43	Multiple epidermal growth factor-like domains protein 10 OS=Mus musculus GN=Megf10 PE=1 SV=1	--	--	--	--	--	K06252	1e-30	134	dre:30037	tenascin	-	-	-	--
CL3273.Contig1_sinensis	610	1	31	0.2943	10.9357	5.21561421851857	Up	4.14544e-10	1.14470336646849e-08	gi|17384256|emb|CAC83675.1|	56.6	9e-07	mucin 5 [Homo sapiens]	--	--	--	--	sp|P98088|MUC5A_HUMAN	56.6	4e-08	Mucin-5AC (Fragments) OS=Homo sapiens GN=MUC5AC PE=1 SV=3	--	--	--	--	--	--	--	--	--	--	-	-	-	--
Unigene8444_sinensis	2409	3	93	0.2236	8.3073	5.21538756185421	Up	3.36528e-28	2.05662888e-26	gi|405952990|gb|EKC20731.1|	304.7	1e-80	Kelch domain-containing protein 9 [Crassostrea gigas]	--	--	--	--	sp|Q8NEP7|KLDC9_HUMAN	103	1e-21	Kelch domain-containing protein 9 OS=Homo sapiens GN=KLHDC9 PE=1 SV=2	--	--	--	--	--	K10459	3e-07	58.2	dre:100333714	kelch-like protein 22	-	-	-	--
CL766.Contig1_sinensis	1155	2	61	0.3108	11.3648	5.19244198157536	Up	7.51142e-19	3.36103481040462e-17	gi|17537423|ref|NP_496097.1|	57.8	1e-06	Protein CUTL-2 [Caenorhabditis elegans] >gi|3881131|emb|CAB16488.1| Protein CUTL-2 [Caenorhabditis elegans]	--	--	--	--	--	--	--	--	--	--	--	--	--	--	--	--	--	--	-	-	-	--
Unigene36470_sinensis	281	1	30	0.6388	22.9736	5.16846882408513	Up	8.84522e-10	2.36106372482759e-08	--	--	--	--	--	--	--	--	--	--	--	--	--	--	--	--	--	--	--	--	--	--	-	-	-	--
Unigene32294_sinensis	692	1	30	0.2594	9.3289	5.16845659368418	Up	8.84522e-10	2.36468776738296e-08	gi|444517342|gb|ELV11508.1|	56.2	1e-06	Proteoglycan 4 [Tupaia chinensis]	--	--	--	--	sp|Q6ZQP7|YV021_HUMAN	54.7	2e-07	Uncharacterized protein LOC284861 OS=Homo sapiens PE=2 SV=1	--	--	--	--	--	--	--	--	--	--	-	-	-	--
CL9264.Contig1_sinensis	1511	1	30	0.1188	4.2724	5.16843998325572	Up	8.84522e-10	2.3637807141542e-08	gi|341901480|gb|EGT57415.1|	90.5	2e-16	hypothetical protein CAEBREN_25496 [Caenorhabditis brenneri]	--	--	--	--	--	--	--	--	--	--	--	--	--	--	--	--	--	--	-	-	-	--
Unigene4595_sinensis	962	1	30	0.1866	6.7106	5.1684208733833	Up	8.84522e-10	2.36196869367574e-08	gi|405973900|gb|EKC38589.1|	160.2	1e-37	Uncharacterized protein C8orf74-like protein [Crassostrea gigas]	--	--	--	--	sp|Q80ZQ3|CH074_MOUSE	114	2e-25	Uncharacterized protein C8orf74 homolog OS=Mus musculus PE=2 SV=1	PH0553	50.1	6e-06	COG3351	Putative archaeal flagellar protein D/E	K10429	4e-06	52.8	rno:29456	microtubule-associated protein 1	-	-	-	--
CL6293.Contig1_sinensis	1105	1	30	0.1625	5.8422	5.16800012451782	Up	8.84522e-10	2.3628743565184e-08	gi|405965932|gb|EKC31270.1|	177.2	1e-42	hypothetical protein CGI_10009372 [Crassostrea gigas]	--	--	--	--	sp|Q63HN8|RN213_HUMAN	54.3	5e-07	E3 ubiquitin-protein ligase RNF213 OS=Homo sapiens GN=RNF213 PE=1 SV=3	--	--	--	--	--	--	--	--	--	--	-	-	-	--
CL9572.Contig2_sinensis	1220	1	29	0.1471	5.1151	5.11989329317116	Up	1.885576e-09	4.88531775172927e-08	gi|426247170|ref|XP_004017359.1|	219.2	3e-55	PREDICTED: glycosyltransferase 1 domain-containing protein 1 [Ovis aries]	--	--	--	--	sp|A4FUP9|GL1D1_MOUSE	218	3e-56	Glycosyltransferase 1 domain-containing protein 1 OS=Mus musculus GN=Glt1d1 PE=2 SV=2	TVN0880	56.2	1e-07	COG0438	Glycosyltransferase	K03843	6e-06	52.8	cel:F09E5.2	alpha-1,3/alpha-1,6-mannosyltransferase [EC:2.4.1.132 2.4.1.257]	-	-	-	--
Unigene28896_sinensis	833	1	29	0.2155	7.4915	5.11949483957038	Up	1.885576e-09	4.88713520625e-08	--	--	--	--	--	--	--	--	--	--	--	--	--	--	--	--	--	--	--	--	--	--	-	-	-	--
Unigene1434_sinensis	2685	723	20407	48.3388	1635.4974	5.08040399673773	Up	0	0	gi|390359721|ref|XP_783336.3|	267.7	2e-69	PREDICTED: uncharacterized protein LOC578054 [Strongylocentrotus purpuratus]	--	--	--	--	--	--	--	--	--	--	--	--	--	K14426	3e-10	68.2	xtr:100494755	solute carrier family 12 (sodium/chloride transporter), member 3	-	-	-	--
Unigene37377_sinensis	1950	2	56	0.1841	6.1797	5.06897527088944	Up	3.2833e-17	1.36157278392857e-15	gi|405965507|gb|EKC30876.1|	253.4	5e-153	Proton myo-inositol cotransporter [Crassostrea gigas]	gi|390339486|ref|XM_793355.2|	67.9	2e-07	PREDICTED: Strongylocentrotus purpuratus solute carrier family 2 (facilitated glucose transporter), member 13 (slc2a13), mRNA	sp|Q96QE2|MYCT_HUMAN	246	3e-110	Proton myo-inositol cotransporter OS=Homo sapiens GN=SLC2A13 PE=1 SV=3	Cgl0181	147	6e-35	COG0477	Permeases of the major facilitator superfamily	K08150	3e-112	245	bfo:BRAFLDRAFT_226180	MFS transporter, SP family, solute carrier family 2 (myo-inositol transporter), member 13	GO:0055085//transmembrane transport	GO:0022857//transmembrane transporter activity	GO:0005886//plasma membrane	--
Unigene3786_sinensis	1104	1	28	0.1626	5.4576	5.06886749753838	Up	4.0156e-09	1.00237490648513e-07	gi|468032|gb|AAA19017.1|	199.1	3e-49	p55CDC [Homo sapiens]	--	--	--	--	sp|Q12834|CDC20_HUMAN	198	2e-50	Cell division cycle protein 20 homolog OS=Homo sapiens GN=CDC20 PE=1 SV=2	SPAC144.13c	144	2e-34	COG2319	FOG: WD40 repeat	K03363	5e-50	198	hsa:991	cell division cycle 20, cofactor of APC complex	GO:0065008;GO:0010564//regulation of cell cycle process;GO:0007067//mitosis;GO:0051439//regulation of ubiquitin-protein ligase activity involved in mitotic cell cycle;GO:0051443//positive regulation of ubiquitin-protein ligase activity;GO:0007268//synaptic transmission;GO:0051128//regulation of cellular component organization;GO:0044767;GO:0051960//regulation of nervous system development	GO:0005515//protein binding	GO:0044430//cytoskeletal part;GO:0015630//microtubule cytoskeleton;GO:0005737//cytoplasm;GO:0044428//nuclear part;GO:0043234//protein complex	--
Unigene14292_sinensis	1172	1	28	0.1532	5.1410	5.06856080971273	Up	4.0156e-09	1.00165712996778e-07	gi|340375302|ref|XP_003386175.1|	211.5	7e-53	PREDICTED: probable 4-coumarate--CoA ligase 1-like [Amphimedon queenslandica]	--	--	--	--	sp|Q54P77|4CL1_DICDI	178	2e-44	Probable 4-coumarate--CoA ligase 1 OS=Dictyostelium discoideum GN=4cl1 PE=3 SV=1	BH2006	132	9e-31	COG0318	Acyl-CoA synthetases (AMP-forming)/AMP-acid ligases II	K00666	3e-21	103	spu:592091	fatty-acyl-CoA synthase [EC:6.2.1.-]	-	-	-	--
Unigene24612_sinensis	1454	1	28	0.1235	4.1439	5.0684062416123	Up	4.0156e-09	1.00201588968481e-07	--	--	--	--	--	--	--	--	--	--	--	--	--	--	--	--	--	--	--	--	--	--	-	-	-	--
Unigene31812_sinensis	3211	2	55	0.1118	3.6858	5.04298569584189	Up	6.97782e-17	2.85627345229142e-15	gi|405950800|gb|EKC18763.1|	1265.4	0.0	WD repeat-containing protein 17 [Crassostrea gigas]	--	--	--	--	sp|Q8IZU2|WDR17_HUMAN	1122	0.0	WD repeat-containing protein 17 OS=Homo sapiens GN=WDR17 PE=2 SV=2	all0283_3	101	7e-21	COG2319	FOG: WD40 repeat	K04508	2e-31	138	spu:590208	transducin (beta)-like 1	-	-	-	--
CL2135.Contig2_sinensis	656	2	55	0.5473	18.0415	5.0428436248491	Up	6.97782e-17	2.85795262539683e-15	--	--	--	--	--	--	--	--	--	--	--	--	--	--	--	--	--	--	--	--	--	--	-	-	-	--
CL5127.Contig3_sinensis	754	1	27	0.2381	7.7056	5.01626777148937	Up	8.54278e-09	2.05726560601452e-07	gi|443693515|gb|ELT94863.1|	121.7	3e-26	hypothetical protein CAPTEDRAFT_205365 [Capitella teleta]	--	--	--	--	--	--	--	--	--	--	--	--	--	--	--	--	--	--	-	-	-	--
Unigene3712_sinensis	1421	1	26	0.1263	3.9373	4.96228009765257	Up	1.81535e-08	4.22423577655311e-07	gi|405971302|gb|EKC36148.1|	77.0	2e-12	hypothetical protein CGI_10024876 [Crassostrea gigas]	--	--	--	--	--	--	--	--	--	--	--	--	--	--	--	--	--	--	-	-	-	--
Unigene27573_sinensis	278	2	52	1.2915	40.2507	4.96189432478907	Up	6.67392e-16	2.61363312242833e-14	gi|471409325|ref|XP_004386238.1|	196.8	2e-49	PREDICTED: tubulin alpha-3 chain-like [Trichechus manatus latirostris]	gi|1532190|gb|U67677.1|HMU67677	208	1e-50	Hirudo medicinalis alpha-1 tubulin mRNA, complete cds	sp|P02553|TBA_LYTPI	196	8e-51	Tubulin alpha chain (Fragment) OS=Lytechinus pictus PE=3 SV=1	SPBC16A3.15c	174	4e-44	COG5023	Tubulin	K07374	3e-50	196	api:100166930	tubulin alpha	-	-	-	--
Unigene27868_sinensis	320	1	26	0.5610	17.4839	4.96188245063737	Up	1.81535e-08	4.22564714834614e-07	gi|444729790|gb|ELW70194.1|	59.7	4e-08	putative E3 ubiquitin-protein ligase HERC6 [Tupaia chinensis]	--	--	--	--	sp|Q15034|HERC3_HUMAN	76.3	1e-14	Probable E3 ubiquitin-protein ligase HERC3 OS=Homo sapiens GN=HERC3 PE=1 SV=1	CAC2722	68.2	4e-12	COG5184	Alpha-tubulin suppressor and related RCC1 domain-containing proteins	K10614	1e-14	78.6	mgp:100539754	E3 ubiquitin-protein ligase HERC3 [EC:6.3.2.19]	-	-	-	--
CL8290.Contig2_sinensis	1580	1	25	0.1136	3.4048	4.90553531599651	Up	3.853e-08	8.68439524425752e-07	gi|405945251|gb|EKC17237.1|	123.6	2e-26	Paraneoplastic antigen-like protein 5 [Crassostrea gigas]	--	--	--	--	--	--	--	--	--	--	--	--	--	--	--	--	--	--	-	-	-	--
CL2275.Contig1_sinensis	363	1	25	0.4945	14.8200	4.90543111643409	Up	3.853e-08	8.68158657826649e-07	--	--	--	--	--	--	--	--	--	--	--	--	--	--	--	--	--	--	--	--	--	--	-	-	-	--
Unigene31780_sinensis	1073	1	25	0.1673	5.0137	4.90536632309404	Up	3.853e-08	8.67877972841901e-07	gi|401430149|ref|XP_003886486.1|	63.2	2e-08	unnamed protein product, partial [Leishmania mexicana MHOM/GT/2001/U1103] >gi|356491245|emb|CBZ41040.1| unnamed protein product, partial [Leishmania mexicana MHOM/GT/2001/U1103]	--	--	--	--	sp|Q9UF83|YM012_HUMAN	57.8	4e-08	Uncharacterized protein DKFZp434B061 OS=Homo sapiens PE=2 SV=2	--	--	--	--	--	K10955	1e-07	58.2	hsa:4583	intestinal mucin-2	-	-	-	--
Unigene21104_sinensis	1098	1	25	0.1635	4.8995	4.90527198710075	Up	3.853e-08	8.68720572815534e-07	gi|444705947|gb|ELW47323.1|	377.9	5e-103	Atrial natriuretic peptide receptor 1 [Tupaia chinensis]	gi|86285412|gb|DQ355437.1|	73.8	2e-09	Gecarcinus lateralis receptor guanylyl cyclase II +0 isoform mRNA, complete cds	sp|P18910|ANPRA_RAT	375	7e-104	Atrial natriuretic peptide receptor 1 OS=Rattus norvegicus GN=Npr1 PE=1 SV=1	all0661	178	2e-44	COG2114	Adenylate cyclase, family 3 (some proteins contain HAMP domain)	K12323	1e-103	377	ecb:100061959	atrial natriuretic peptide receptor A [EC:4.6.1.2]	GO:0048662//negative regulation of smooth muscle cell proliferation;GO:0042417//dopamine metabolic process;GO:0030828//positive regulation of cGMP biosynthetic process;GO:0007168//receptor guanylyl cyclase signaling pathway;GO:0008217//regulation of blood pressure;GO:0035556//intracellular signal transduction	GO:0004383//guanylate cyclase activity;GO:0016772//transferase activity, transferring phosphorus-containing groups;GO:0017046//peptide hormone binding;GO:0016941//natriuretic peptide receptor activity;GO:0019901//protein kinase binding;GO:0005525//GTP binding	GO:0005886//plasma membrane	--
CL9784.Contig2_sinensis	3722	3	75	0.1447	4.3361	4.90526120181294	Up	2.61928e-22	1.34178395823529e-20	gi|405951131|gb|EKC19070.1|	473.8	3e-131	Monocarboxylate transporter 10 [Crassostrea gigas]	--	--	--	--	sp|Q3U9N9|MOT10_MOUSE	204	9e-52	Monocarboxylate transporter 10 OS=Mus musculus GN=Slc16a10 PE=1 SV=1	AF0367	101	8e-21	COG0477	Permeases of the major facilitator superfamily	K08187	4e-64	247	nve:NEMVE_v1g88648	MFS transporter, MCP family, solute carrier family 16 (monocarboxylic acid transporters), member 10	GO:0044763;GO:0032502//developmental process	-	-	--
Unigene32874_sinensis	1697	16	393	1.6925	49.8340	4.87990263981569	Up	4.38354e-111	7.61588150274314e-109	gi|114052899|ref|NP_001040551.1|	154.8	1e-35	interferon regulatory factor 2 [Rattus norvegicus] >gi|110340295|gb|ABG67970.1| interferon regulatory factor 2 [Rattus norvegicus] >gi|183986585|gb|AAI66593.1| Interferon regulatory factor 2 [Rattus norvegicus]	--	--	--	--	sp|P23906|IRF2_MOUSE	154	4e-37	Interferon regulatory factor 2 OS=Mus musculus GN=Irf2 PE=1 SV=1	--	--	--	--	--	K10153	2e-36	154	rno:290749	interferon regulatory factor 2	GO:0006351//transcription, DNA-dependent	GO:0003677//DNA binding	GO:0005634//nucleus	--
CL6368.Contig1_sinensis	1221	2	49	0.2940	8.6357	4.87642506553561	Up	6.34584e-15	2.36674693233405e-13	--	--	--	--	--	--	--	--	--	--	--	--	--	--	--	--	--	--	--	--	--	--	-	-	-	--
Unigene24445_sinensis	1443	3	73	0.3732	10.8861	4.86639439745604	Up	1.17233e-21	5.87167927893602e-20	--	--	--	--	--	--	--	--	--	--	--	--	--	--	--	--	--	--	--	--	--	--	-	-	-	--
Unigene20421_sinensis	555	3	73	0.9704	28.3038	4.86627239813751	Up	1.17233e-21	5.86746111853448e-20	--	--	--	--	--	--	--	--	--	--	--	--	--	--	--	--	--	--	--	--	--	--	-	-	-	--
CL1353.Contig1_sinensis	255	9	218	6.3358	183.9633	4.85974737733854	Up	4.00386e-62	4.32472747813953e-60	--	--	--	--	--	--	--	--	--	--	--	--	--	--	--	--	--	--	--	--	--	--	-	-	-	--
Unigene21214_sinensis	455	1	24	0.3945	11.3505	4.84658674049995	Up	8.16726e-08	1.76107965626741e-06	--	--	--	--	--	--	--	--	--	--	--	--	--	--	--	--	--	--	--	--	--	--	-	-	-	--
CL1343.Contig1_sinensis	1257	1	24	0.1428	4.1086	4.84657899674223	Up	8.16726e-08	1.75999021633158e-06	--	--	--	--	--	--	--	--	--	--	--	--	--	--	--	--	--	--	--	--	--	--	-	-	-	--
Unigene35224_sinensis	598	1	24	0.3002	8.6362	4.84640077208898	Up	8.16726e-08	1.7605347677599e-06	--	--	--	--	--	--	--	--	--	--	--	--	--	--	--	--	--	--	--	--	--	--	-	-	-	--
Unigene6723_sinensis	564	1	24	0.3183	9.1569	4.84640020527697	Up	8.16726e-08	1.75944600166976e-06	gi|383863436|ref|XP_003707187.1|	108.2	2e-22	PREDICTED: histone-lysine N-methyltransferase SETMAR-like [Megachile rotundata]	--	--	--	--	--	--	--	--	--	--	--	--	--	--	--	--	--	--	-	-	-	--
Unigene28776_sinensis	950	1	24	0.1890	5.4363	4.84616693328103	Up	8.16726e-08	1.75890212346213e-06	--	--	--	--	--	--	--	--	--	--	--	--	--	--	--	--	--	--	--	--	--	--	-	-	-	--
Unigene22674_sinensis	1151	1	24	0.1560	4.4869	4.84610109668021	Up	8.16726e-08	1.75835858139679e-06	gi|449675066|ref|XP_002161185.2|	55.5	6e-06	PREDICTED: uncharacterized protein LOC100208015 [Hydra magnipapillata]	--	--	--	--	sp|Q02817|MUC2_HUMAN	65.1	3e-10	Mucin-2 OS=Homo sapiens GN=MUC2 PE=1 SV=2	slr0599	50.4	6e-06	COG0515	Serine/threonine protein kinase	K10955	2e-09	63.9	gga:100857128	intestinal mucin-2	-	-	-	--
Unigene38533_sinensis	658	2	47	0.5456	15.3705	4.81617664185236	Up	2.8379e-14	1.01547845454545e-12	--	--	--	--	--	--	--	--	--	--	--	--	--	--	--	--	--	--	--	--	--	--	-	-	-	--
Unigene5003_sinensis	1062	1	23	0.1690	4.6603	4.78532767763312	Up	1.728822e-07	3.56769253311611e-06	gi|405965442|gb|EKC30818.1|	260.0	1e-67	Structure-specific endonuclease subunit SLX4 [Crassostrea gigas]	--	--	--	--	--	--	--	--	--	--	--	--	--	--	--	--	--	--	-	-	-	--
CL7037.Contig1_sinensis	507	2	46	0.7081	19.5238	4.78513695145514	Up	5.99436e-14	2.11882834520548e-12	gi|157137060|ref|XP_001656999.1|	85.9	8e-16	P21-activated kinase, pak [Aedes aegypti] >gi|108884266|gb|EAT48491.1| AAEL000489-PA [Aedes aegypti]	--	--	--	--	sp|Q55D99|PAKA_DICDI	75.1	7e-14	Serine/threonine-protein kinase pakA OS=Dictyostelium discoideum GN=pakA PE=1 SV=1	SA1063_1	50.4	1e-06	COG0515	Serine/threonine protein kinase	K04409	1e-16	85.9	aag:AaeL_AAEL000489	p21-activated kinase 1 [EC:2.7.11.1]	GO:0007015//actin filament organization	GO:0004672//protein kinase activity;GO:0019900//kinase binding	-	--
Unigene29851_sinensis	508	1	23	0.3534	9.7427	4.78494769761453	Up	1.728822e-07	3.56663606508736e-06	--	--	--	--	--	--	--	--	--	--	--	--	--	--	--	--	--	--	--	--	--	--	-	-	-	--
Unigene7711_sinensis	460	1	23	0.3903	10.7593	4.784856946214	Up	1.728822e-07	3.56558022255773e-06	--	--	--	--	--	--	--	--	--	--	--	--	--	--	--	--	--	--	--	--	--	--	-	-	-	--
CL9264.Contig2_sinensis	1664	1	23	0.1079	2.9743	4.78478340088287	Up	1.728822e-07	3.56452500497189e-06	gi|341901480|gb|EGT57415.1|	90.5	2e-16	hypothetical protein CAEBREN_25496 [Caenorhabditis brenneri]	--	--	--	--	sp|Q02817|MUC2_HUMAN	56.2	2e-07	Mucin-2 OS=Homo sapiens GN=MUC2 PE=1 SV=2	--	--	--	--	--	K10955	8e-07	56.2	hsa:4583	intestinal mucin-2	-	-	-	--
CL5186.Contig2_sinensis	2027	1	23	0.0886	2.4417	4.78443544516916	Up	1.728822e-07	3.56347041177515e-06	gi|405977075|gb|EKC41545.1|	160.6	6e-83	Dehydrogenase/reductase SDR family member 11 [Crassostrea gigas]	--	--	--	--	sp|Q6UWP2|DHR11_HUMAN	162	3e-39	Dehydrogenase/reductase SDR family member 11 OS=Homo sapiens GN=DHRS11 PE=1 SV=1	SMa0320	77.4	1e-29	COG4221	Short-chain alcohol dehydrogenase of unknown specificity	K16066	4e-22	65.9	api:100162592	malonic semialdehyde reductase [EC:1.1.1.-]	GO:0008152//metabolic process	GO:0005488//binding	-	--
Unigene28404_sinensis	1282	1	22	0.1400	3.6927	4.72117732850252	Up	3.65404e-07	7.25073519681003e-06	gi|405955306|gb|EKC22471.1|	127.9	1e-27	Sacsin [Crassostrea gigas]	--	--	--	--	sp|Q9NZJ4|SACS_HUMAN	214	4e-55	Sacsin OS=Homo sapiens GN=SACS PE=1 SV=2	--	--	--	--	--	--	--	--	--	--	-	-	-	--
Unigene29103_sinensis	796	1	22	0.2255	5.9474	4.72105977068562	Up	3.65404e-07	7.25486784724993e-06	--	--	--	--	--	--	--	--	--	--	--	--	--	--	--	--	--	--	--	--	--	--	-	-	-	--
CL8846.Contig2_sinensis	2008	1	22	0.0894	2.3576	4.72090032394068	Up	3.65404e-07	7.26107566343411e-06	gi|405973795|gb|EKC38487.1|	456.8	1e-126	Serine/threonine-protein kinase 33 [Crassostrea gigas]	gi|471226911|ref|XM_004032432.1|	63.9	3e-06	Ichthyophthirius multifiliis protein kinase domain protein (IMG5_121390) mRNA, complete cds	sp|Q924X7|STK33_MOUSE	339	2e-92	Serine/threonine-protein kinase 33 OS=Mus musculus GN=Stk33 PE=1 SV=2	ECU01g0630	154	5e-37	COG0515	Serine/threonine protein kinase	K08813	2e-106	387	spu:588969	serine/threonine kinase 33 [EC:2.7.11.1]	GO:0046777//protein autophosphorylation	GO:0005515//protein binding;GO:0004674//protein serine/threonine kinase activity	GO:0044424//intracellular part	--
Unigene27138_sinensis	1689	1	22	0.1063	2.8029	4.72070677179381	Up	3.65404e-07	7.2590052112917e-06	gi|405959586|gb|EKC25606.1|	136.3	4e-30	hypothetical protein CGI_10010390 [Crassostrea gigas]	--	--	--	--	sp|Q54I71|AARA_DICDI	89.7	2e-17	Protein aardvark OS=Dictyostelium discoideum GN=aarA PE=2 SV=1	--	--	--	--	--	K08844	7e-10	66.2	mgp:100548936	leucine-rich repeat kinase 2 [EC:2.7.11.1]	-	-	-	--
Unigene6516_sinensis	644	1	22	0.2788	7.3511	4.72065768101838	Up	3.65404e-07	7.2569359395667e-06	--	--	--	--	--	--	--	--	--	--	--	--	--	--	--	--	--	--	--	--	--	--	-	-	-	--
CL3147.Contig2_sinensis	2214	2	44	0.1622	4.2765	4.7205848153292	Up	2.66778e-13	9.07970516951637e-12	gi|322794382|gb|EFZ17486.1|	241.1	1e-61	hypothetical protein SINV_16528 [Solenopsis invicta]	--	--	--	--	sp|P97603|NEO1_RAT	221	7e-57	Neogenin (Fragment) OS=Rattus norvegicus GN=Neo1 PE=2 SV=1	SPBP4H10.20	114	9e-25	COG5075	Uncharacterized conserved protein	K06766	3e-56	221	ssc:100510914	neogenin	-	-	-	--
Unigene29413_sinensis	892	1	22	0.2013	5.3073	4.72055902334289	Up	3.65404e-07	7.25280093333333e-06	gi|405976487|gb|EKC40992.1|	223.8	9e-57	Sarcoplasmic calcium-binding proteins II, V, VI, and VII [Crassostrea gigas]	--	--	--	--	sp|P04569|SCP1_BRALA	63.2	7e-10	Sarcoplasmic calcium-binding proteins I, III, and IV OS=Branchiostoma lanceolatum PE=1 SV=2	--	--	--	--	--	--	--	--	--	--	-	-	-	--
Unigene34231_sinensis	2401	4	87	0.2991	7.7973	4.70427482751415	Up	3.97328e-25	2.23778855553759e-23	gi|405958597|gb|EKC24709.1|	159.5	8e-37	Oncoprotein-induced transcript 3 protein [Crassostrea gigas]	--	--	--	--	sp|P70412|CUZD1_MOUSE	82.4	4e-15	CUB and zona pellucida-like domain-containing protein 1 OS=Mus musculus GN=Cuzd1 PE=2 SV=2	--	--	--	--	--	K13912	1e-16	89.7	tgu:100226373	deleted in malignant brain tumors 1 protein	-	-	-	--
CL6296.Contig1_sinensis	632	3	65	0.8521	22.1315	4.69893467441555	Up	4.60476e-19	2.07777865569948e-17	--	--	--	--	--	--	--	--	--	--	--	--	--	--	--	--	--	--	--	--	--	--	-	-	-	--
Unigene30168_sinensis	752	2	43	0.4774	12.3045	4.68784365765038	Up	5.6206e-13	1.87899031381958e-11	--	--	--	--	--	--	--	--	--	--	--	--	--	--	--	--	--	--	--	--	--	--	-	-	-	--
CL8026.Contig2_sinensis	794	2	43	0.4522	11.6537	4.68768327481119	Up	5.6206e-13	1.87989237349976e-11	gi|405964667|gb|EKC30124.1|	59.3	2e-07	SECIS-binding protein 2-like protein [Crassostrea gigas]	--	--	--	--	--	--	--	--	--	--	--	--	--	--	--	--	--	--	-	-	-	--
CL6130.Contig4_sinensis	2654	2	43	0.1353	3.4864	4.68750435713937	Up	5.6206e-13	1.87808911942446e-11	gi|405951312|gb|EKC19236.1|	414.1	2e-113	UPF0638 protein B [Crassostrea gigas]	--	--	--	--	sp|P0C875|F228B_HUMAN	105	4e-22	Protein FAM228B OS=Homo sapiens GN=FAM228B PE=2 SV=1	--	--	--	--	--	--	--	--	--	--	-	-	-	--
CL6460.Contig1_sinensis	1097	3	64	0.4909	12.5542	4.67659712075182	Up	9.68986e-19	4.30263133422562e-17	gi|405963880|gb|EKC29412.1|	68.9	5e-10	CDK5 regulatory subunit-associated protein 3 [Crassostrea gigas]	gi|41222916|emb|BX000431.10|	63.9	2e-06	Zebrafish DNA sequence from clone DKEY-14B11 in linkage group 15, complete sequence	sp|P02707|LECH_CHICK	57.0	7e-08	Hepatic lectin OS=Gallus gallus PE=1 SV=1	--	--	--	--	--	K06560	1e-06	55.1	bfo:BRAFLDRAFT_66146	mannose receptor, C type	-	-	-	--
Unigene32317_sinensis	307	3	63	1.7542	44.1588	4.65381582097117	Up	2.03772e-18	8.91185905084746e-17	--	--	--	--	--	--	--	--	--	--	--	--	--	--	--	--	--	--	--	--	--	--	-	-	-	--
Unigene10052_sinensis	537	1	21	0.3343	8.4151	4.6537651557115	Up	7.71066e-07	1.46654100884521e-05	--	--	--	--	--	--	--	--	--	--	--	--	--	--	--	--	--	--	--	--	--	--	-	-	-	--
Unigene39348_sinensis	713	1	21	0.2518	6.3379	4.65365470874808	Up	7.71066e-07	1.46694148427089e-05	--	--	--	--	gi|380503788|dbj|AB671263.1|	77.8	7e-11	Corbicula japonica DNA, microsatellite: locus C102	--	--	--	--	--	--	--	--	--	--	--	--	--	--	-	-	-	--
Unigene31209_sinensis	1059	2	41	0.3390	8.3311	4.61914981648903	Up	2.4878e-12	8.06151340465116e-11	--	--	--	--	--	--	--	--	--	--	--	--	--	--	--	--	--	--	--	--	--	--	-	-	-	--
Unigene32302_sinensis	939	4	82	0.7647	18.7916	4.61905022512267	Up	1.630152e-23	8.76319905e-22	gi|405965399|gb|EKC30776.1|	113.6	1e-23	Glutaredoxin-1 [Crassostrea gigas]	--	--	--	--	sp|P12309|GLRX1_PIG	64.7	3e-10	Glutaredoxin-1 OS=Sus scrofa GN=GLRX PE=1 SV=2	SPAC4F10.20	50.8	3e-06	COG0695	Glutaredoxin and related proteins	K03676	5e-14	79.0	cbr:CBG22036	glutaredoxin 3	-	-	-	--
Unigene39320_sinensis	579	1	20	0.3100	7.4330	4.58360448740415	Up	1.624216e-06	2.94757761146132e-05	--	--	--	--	--	--	--	--	--	--	--	--	--	--	--	--	--	--	--	--	--	--	-	-	-	--
Unigene28087_sinensis	810	1	20	0.2216	5.3132	4.58355123340281	Up	1.624216e-06	2.9491140084441e-05	gi|260808542|ref|XP_002599066.1|	92.0	3e-17	hypothetical protein BRAFLDRAFT_81728 [Branchiostoma floridae] >gi|229284342|gb|EEN55078.1| hypothetical protein BRAFLDRAFT_81728 [Branchiostoma floridae]	--	--	--	--	sp|A8MW99|MEI4L_HUMAN	61.6	2e-09	Meiosis-specific protein MEI4-like OS=Homo sapiens GN=MEI4 PE=3 SV=1	--	--	--	--	--	--	--	--	--	--	GO:0044699;GO:0000003//reproduction	-	-	--
Unigene28159_sinensis	642	1	20	0.2796	6.7036	4.58349980098679	Up	1.624216e-06	2.9460428144754e-05	--	--	--	--	--	--	--	--	--	--	--	--	--	--	--	--	--	--	--	--	--	--	-	-	-	--
Unigene32069_sinensis	285	1	20	0.6299	15.1008	4.58335836025151	Up	1.624216e-06	2.94988280771637e-05	--	--	--	--	--	--	--	--	--	--	--	--	--	--	--	--	--	--	--	--	--	--	-	-	-	--
Unigene346_sinensis	286	1	20	0.6277	15.0480	4.58335273482748	Up	1.624216e-06	2.946810013125e-05	--	--	--	--	--	--	--	--	--	--	--	--	--	--	--	--	--	--	--	--	--	--	-	-	-	--
CL6996.Contig2_sinensis	1641	2	40	0.2188	5.2453	4.5833406455051	Up	5.22614e-12	1.6595257413856e-10	gi|291235382|ref|XP_002737623.1|	352.8	3e-95	PREDICTED: polyprotein-like [Saccoglossus kowalevskii]	--	--	--	--	sp|Q09575|YRD6_CAEEL	156	1e-37	Uncharacterized protein K02A2.6 OS=Caenorhabditis elegans GN=K02A2.6 PE=2 SV=1	SPAC9.04	118	3e-26	COG2801	Transposase and inactivated derivatives	K11321	1e-34	148	spu:576401	bromodomain-containing protein 8	-	-	-	--
Unigene28409_sinensis	646	1	20	0.2779	6.6621	4.58333926978315	Up	1.624216e-06	2.94450961498829e-05	--	--	--	--	--	--	--	--	sp|Q8MP30|Y7791_DICDI	51.2	2e-06	Uncharacterized histidine-rich protein DDB_G0274557 OS=Dictyostelium discoideum GN=DDB_G0274557 PE=4 SV=1	--	--	--	--	--	--	--	--	--	--	-	-	-	--
CL2333.Contig1_sinensis	1033	1	20	0.1738	4.1662	4.58323211089478	Up	1.624216e-06	2.94527601520042e-05	gi|156366260|ref|XP_001627057.1|	71.2	3e-29	predicted protein [Nematostella vectensis] >gi|156213955|gb|EDO34957.1| predicted protein [Nematostella vectensis]	--	--	--	--	sp|Q95SX7|RTBS_DROME	71.2	3e-12	Probable RNA-directed DNA polymerase from transposon BS OS=Drosophila melanogaster GN=RTase PE=2 SV=1	--	--	--	--	--	K08017	2e-19	94.0	hmg:100197999	advillin	-	-	-	--
Unigene28807_sinensis	992	1	20	0.1810	4.3384	4.58310147304464	Up	1.624216e-06	2.94834560979677e-05	gi|405954240|gb|EKC21737.1|	431.4	3e-119	DnaJ-like protein subfamily C member 27 [Crassostrea gigas]	gi|344280390|ref|XM_003411919.1|	111	7e-21	PREDICTED: Loxodonta africana dnaJ homolog subfamily C member 27-like (LOC100675011), mRNA	sp|Q6IMM1|DJC27_CHICK	365	8e-101	DnaJ homolog subfamily C member 27 OS=Gallus gallus GN=DNAJC27 PE=2 SV=1	YER031c	96.3	7e-20	COG1100	GTPase SAR1 and related small G proteins	K07890	2e-24	114	cel:T01B7.3	Ras-related protein Rab-21	GO:0007264//small GTPase mediated signal transduction	GO:0005525//GTP binding	GO:0005739//mitochondrion	--
CL6996.Contig1_sinensis	2778	7	138	0.4523	10.6896	4.56278406287753	Up	1.988702e-38	1.51919824164474e-36	gi|291235382|ref|XP_002737623.1|	556.6	2e-156	PREDICTED: polyprotein-like [Saccoglossus kowalevskii]	--	--	--	--	sp|P04323|POL3_DROME	235	4e-61	Retrovirus-related Pol polyprotein from transposon 17.6 OS=Drosophila melanogaster GN=pol PE=4 SV=1	SPAC9.04	256	1e-67	COG2801	Transposase and inactivated derivatives	K04228	3e-67	257	dre:100151502	arginine vasopressin receptor 2	-	-	-	--
Unigene34249_sinensis	2035	2	39	0.1764	4.1240	4.54712186669795	Up	1.096688e-11	3.42624019156951e-10	gi|307186388|gb|EFN72022.1|	82.0	1e-13	Breast cancer type 2 susceptibility protein-like protein [Camponotus floridanus]	--	--	--	--	sp|P30622|CLIP1_HUMAN	57.4	1e-07	CAP-Gly domain-containing linker protein 1 OS=Homo sapiens GN=CLIP1 PE=1 SV=2	--	--	--	--	--	K08775	1e-13	79.3	api:100166339	breast cancer 2 susceptibility protein	-	-	-	--
Unigene482_sinensis	1265	2	39	0.2838	6.6342	4.54697601093091	Up	1.096688e-11	3.42777731144011e-10	gi|347300360|ref|NP_001231474.1|	77.8	1e-12	serine/arginine repetitive matrix protein 2 [Sus scrofa]	gi|28315973|tpe|BN000065.1|HSA000065	63.9	2e-06	TPA_inf: Homo sapiens SMP1 gene, RHD gene and RHCE gene	sp|Q8BTI8|SRRM2_MOUSE	69.3	2e-11	Serine/arginine repetitive matrix protein 2 OS=Mus musculus GN=Srrm2 PE=1 SV=3	--	--	--	--	--	K13172	5e-12	72.8	aml:100474834	serine/arginine repetitive matrix protein 2	-	-	-	--
Unigene36468_sinensis	260	2	39	1.3809	32.2780	4.54687043602841	Up	1.096688e-11	3.42931581113106e-10	--	--	--	--	--	--	--	--	--	--	--	--	--	--	--	--	--	--	--	--	--	--	-	-	-	--
CL4780.Contig2_sinensis	2720	2	39	0.1320	3.0854	4.54684770187694	Up	1.096688e-11	3.43085569250112e-10	gi|443688668|gb|ELT91288.1|	399.1	6e-109	hypothetical protein CAPTEDRAFT_220260 [Capitella teleta]	--	--	--	--	sp|Q4V8C9|LRC56_RAT	199	4e-50	Leucine-rich repeat-containing protein 56 OS=Rattus norvegicus GN=Lrrc56 PE=2 SV=1	CAC3279_2	65.5	5e-10	COG4886	Leucine-rich repeat (LRR) protein	K10411	5e-08	60.8	spu:581052	dynein light chain 1, axonemal	-	-	-	--
Unigene26070_sinensis	913	1	19	0.1966	4.4781	4.50955151843673	Up	3.41478e-06	5.88726324721604e-05	gi|405968412|gb|EKC33486.1|	323.6	8e-87	Zinc finger MYND domain-containing protein 10 [Crassostrea gigas]	--	--	--	--	sp|O75800|ZMY10_HUMAN	230	4e-60	Zinc finger MYND domain-containing protein 10 OS=Homo sapiens GN=ZMYND10 PE=1 SV=2	--	--	--	--	--	--	--	--	--	--	-	GO:0008270//zinc ion binding	-	--
CL8859.Contig1_sinensis	1779	3	57	0.3027	6.8947	4.50952719873773	Up	1.736488e-16	6.96484642901554e-15	gi|395507244|ref|XP_003757937.1|	471.9	5e-131	PREDICTED: radical S-adenosyl methionine domain-containing protein 2 [Sarcophilus harrisii]	gi|299892771|gb|GU929942.1|	69.9	4e-08	Sciaenops ocellatus viperin (Vip) mRNA, complete cds	sp|Q6EE23|RSAD2_SINCH	461	3e-129	Radical S-adenosyl methionine domain-containing protein 2 OS=Siniperca chuatsi GN=rsad2 PE=2 SV=1	HP0768	60.1	1e-08	COG2896	Molybdenum cofactor biosynthesis enzyme	K15045	5e-129	462	nve:NEMVE_v1g87644	radical S-adenosyl methionine domain-containing protein 2	GO:0051607//defense response to virus;GO:0045087//innate immune response;GO:0008152//metabolic process	GO:0046872//metal ion binding;GO:0051539//4 iron, 4 sulfur cluster binding;GO:0003824//catalytic activity	GO:0005789//endoplasmic reticulum membrane;GO:0005811//lipid particle	--
Unigene613_sinensis	1017	1	19	0.1765	4.0202	4.50952718688238	Up	3.41478e-06	5.88580672488867e-05	--	--	--	--	--	--	--	--	--	--	--	--	--	--	--	--	--	--	--	--	--	--	-	-	-	--
Unigene15445_sinensis	1040	1	19	0.1726	3.9313	4.50950209130826	Up	3.41478e-06	5.89163714264487e-05	--	--	--	--	--	--	--	--	--	--	--	--	--	--	--	--	--	--	--	--	--	--	-	-	-	--
Unigene26353_sinensis	962	1	19	0.1866	4.2500	4.50944194994803	Up	3.41478e-06	5.88435092307692e-05	--	--	--	--	--	--	--	--	--	--	--	--	--	--	--	--	--	--	--	--	--	--	-	-	-	--
CL9648.Contig1_sinensis	678	3	57	0.7943	18.0909	4.50943636852342	Up	1.736488e-16	6.96083903751439e-15	--	--	--	--	--	--	--	--	--	--	--	--	--	--	--	--	--	--	--	--	--	--	-	-	-	--
Unigene27638_sinensis	317	2	38	1.1326	25.7952	4.50939229224674	Up	2.2988e-11	7.03360110671937e-10	--	--	--	--	--	--	--	--	--	--	--	--	--	--	--	--	--	--	--	--	--	--	-	-	-	--
CL4211.Contig3_sinensis	624	1	19	0.2877	6.5522	4.50934226842712	Up	3.41478e-06	5.89455668533201e-05	gi|390343548|ref|XP_785115.3|	167.2	4e-40	PREDICTED: acyl-CoA synthetase family member 3, mitochondrial-like [Strongylocentrotus purpuratus]	--	--	--	--	sp|Q3URE1|ACSF3_MOUSE	155	8e-38	Acyl-CoA synthetase family member 3, mitochondrial OS=Mus musculus GN=Acsf3 PE=2 SV=2	ML1051	116	3e-26	COG0318	Acyl-CoA synthetases (AMP-forming)/AMP-acid ligases II	K00666	6e-18	90.9	acs:100561027	fatty-acyl-CoA synthase [EC:6.2.1.-]	GO:0006633//fatty acid biosynthetic process;GO:0090410//malonate catabolic process	GO:0090409//malonyl-CoA synthetase activity	GO:0005739//mitochondrion	--
Unigene8808_sinensis	936	1	19	0.1918	4.3681	4.50933125914363	Up	3.41478e-06	5.88872049059406e-05	--	--	--	--	--	--	--	--	--	--	--	--	--	--	--	--	--	--	--	--	--	--	-	-	-	--
CL9062.Contig1_sinensis	496	2	38	0.7239	16.4861	4.50931592448154	Up	2.2988e-11	7.03051348551361e-10	gi|405967545|gb|EKC32693.1|	139.4	6e-32	Interferon-induced protein 44-like protein [Crassostrea gigas]	--	--	--	--	--	--	--	--	--	--	--	--	--	--	--	--	--	--	-	-	-	--
Unigene23532_sinensis	590	1	19	0.3043	6.9297	4.5092266577147	Up	3.41478e-06	5.89017845555831e-05	--	--	--	--	--	--	--	--	--	--	--	--	--	--	--	--	--	--	--	--	--	--	-	-	-	--
Unigene24028_sinensis	765	1	19	0.2347	5.3445	4.50916523721865	Up	3.41478e-06	5.89309655239039e-05	gi|72089413|ref|XP_791175.1|	300.8	4e-80	PREDICTED: histone deacetylase 8-like [Strongylocentrotus purpuratus]	--	--	--	--	sp|Q6GPA7|HDAC8_XENLA	291	1e-78	Histone deacetylase 8 OS=Xenopus laevis GN=hdac8 PE=2 SV=1	ECU03g1370	224	9e-59	COG0123	Deacetylases, including yeast histone deacetylase and acetoin utilization protein	K11405	6e-81	300	spu:586295	histone deacetylase 8 [EC:3.5.1.98]	GO:0000122//negative regulation of transcription from RNA polymerase II promoter;GO:0005976//polysaccharide metabolic process;GO:0016575//histone deacetylation;GO:0006333//chromatin assembly or disassembly;GO:0071922//regulation of cohesin localization to chromatin	GO:0032129//histone deacetylase activity (H3-K9 specific);GO:0034739//histone deacetylase activity (H4-K16 specific);GO:0031078//histone deacetylase activity (H3-K14 specific);GO:0017136//NAD-dependent histone deacetylase activity;GO:0008134//transcription factor binding	GO:0005737//cytoplasm;GO:0000118//histone deacetylase complex;GO:0000228//nuclear chromosome	--
Unigene23673_sinensis	1416	1	19	0.1268	2.8874	4.50914433160893	Up	3.41478e-06	5.88289584124629e-05	gi|260827595|ref|XP_002608750.1|	378.6	4e-103	hypothetical protein BRAFLDRAFT_212086 [Branchiostoma floridae] >gi|229294102|gb|EEN64760.1| hypothetical protein BRAFLDRAFT_212086 [Branchiostoma floridae]	--	--	--	--	sp|P54923|ADPRH_MOUSE	358	2e-98	[Protein ADP-ribosylarginine] hydrolase OS=Mus musculus GN=Adprh PE=2 SV=1	MA4144	60.8	5e-09	COG1397	ADP-ribosylglycohydrolase	K01245	5e-104	378	bfo:BRAFLDRAFT_212086	ADP-ribosylarginine hydrolase [EC:3.2.2.19]	GO:0006464//cellular protein modification process	GO:0003875//ADP-ribosylarginine hydrolase activity	-	--
CL8455.Contig2_sinensis	1374	1	19	0.1307	2.9757	4.50889803990135	Up	3.41478e-06	5.89601754200744e-05	gi|443700503|gb|ELT99416.1|	155.6	5e-36	hypothetical protein CAPTEDRAFT_168266 [Capitella teleta]	--	--	--	--	--	--	--	--	--	--	--	--	--	--	--	--	--	--	-	-	-	--
CL2416.Contig4_sinensis	1176	3	56	0.4579	10.2470	4.48402522048183	Up	3.63294e-16	1.44136273838269e-14	gi|786117|gb|AAA98076.1|	95.9	4e-18	nuclear protein [Ensis minor]	--	--	--	--	sp|Q08170|SRSF4_HUMAN	125	1e-28	Serine/arginine-rich splicing factor 4 OS=Homo sapiens GN=SRSF4 PE=1 SV=2	YOR310c	55.8	1e-07	COG1498	Protein implicated in ribosomal biogenesis, Nop56p homolog	K13172	3e-32	140	dmo:Dmoj_GI16794	serine/arginine repetitive matrix protein 2	-	-	-	--
CL6864.Contig1_sinensis	1143	3	56	0.4712	10.5428	4.48377472532791	Up	3.63294e-16	1.44054238394991e-14	--	--	--	--	--	--	--	--	--	--	--	--	--	--	--	--	--	--	--	--	--	--	-	-	-	--
Unigene1724_sinensis	3859	4	74	0.1861	4.1264	4.47073371773006	Up	6.03574e-21	2.95090505305263e-19	gi|405960978|gb|EKC26842.1|	310.1	6e-82	Sacsin [Crassostrea gigas]	--	--	--	--	sp|Q9NZJ4|SACS_HUMAN	232	4e-60	Sacsin OS=Homo sapiens GN=SACS PE=1 SV=2	--	--	--	--	--	--	--	--	--	--	-	-	-	--
CL5465.Contig1_sinensis	628	10	184	2.8585	63.0483	4.46312727565081	Up	4.20742e-50	3.9719071e-48	--	--	--	--	--	--	--	--	--	--	--	--	--	--	--	--	--	--	--	--	--	--	-	-	-	--
Unigene31444_sinensis	760	3	54	0.7086	15.2896	4.43143538833802	Up	1.586102e-15	6.10509062088398e-14	gi|405974464|gb|EKC39107.1|	118.2	4e-25	cAMP-dependent protein kinase regulatory subunit [Crassostrea gigas]	--	--	--	--	--	--	--	--	--	--	--	--	--	K10273	1e-09	63.9	tad:TRIADDRAFT_55492	F-box and leucine-rich repeat protein 7	-	-	-	--
CL350.Contig4_sinensis	1629	1	18	0.1102	2.3778	4.43143124411798	Up	7.16424e-06	0.000116863834361976	gi|390358424|ref|XP_788723.3|	223.8	2e-56	PREDICTED: uncharacterized protein LOC583735 [Strongylocentrotus purpuratus]	--	--	--	--	sp|Q4KM91|CDCA7_RAT	205	2e-52	Cell division cycle-associated protein 7 OS=Rattus norvegicus GN=Cdca7 PE=2 SV=1	--	--	--	--	--	--	--	--	--	--	-	-	-	--
Unigene14240_sinensis	870	2	36	0.4127	8.9043	4.43133685672691	Up	1.006452e-10	2.9216043495e-09	gi|291238935|ref|XP_002739380.1|	56.2	2e-06	PREDICTED: hypothetical protein [Saccoglossus kowalevskii]	--	--	--	--	sp|Q3KPT0|CC169_XENLA	54.7	3e-07	Coiled-coil domain-containing protein 169 OS=Xenopus laevis GN=ccdc169 PE=2 SV=2	--	--	--	--	--	--	--	--	--	--	-	-	-	--
CL1814.Contig1_sinensis	547	1	18	0.3282	7.0811	4.43132634646782	Up	7.16424e-06	0.000116836478595506	gi|325504341|emb|CBX41670.1|	117.1	4e-25	putative C1q domain containing protein MgC1q21 [Mytilus galloprovincialis]	--	--	--	--	sp|P83425|HIP_MYTED	91.3	1e-18	Heavy metal-binding protein HIP OS=Mytilus edulis PE=1 SV=1	--	--	--	--	--	--	--	--	--	--	-	-	-	--
CL1878.Contig1_sinensis	1233	1	18	0.1456	3.1414	4.43132539494	Up	7.16424e-06	0.000116754488084211	gi|260787609|ref|XP_002588845.1|	243.0	2e-62	hypothetical protein BRAFLDRAFT_237296 [Branchiostoma floridae] >gi|229274015|gb|EEN44856.1| hypothetical protein BRAFLDRAFT_237296 [Branchiostoma floridae]	--	--	--	--	sp|Q9NPC3|CIP1_HUMAN	206	7e-53	E3 ubiquitin-protein ligase CCNB1IP1 OS=Homo sapiens GN=CCNB1IP1 PE=1 SV=1	--	--	--	--	--	K10639	3e-63	243	bfo:BRAFLDRAFT_237296	E3 ubiquitin-protein ligase CCNP1IP1 [EC:6.3.2.19]	GO:0051026//chiasma assembly;GO:0006915//apoptotic process;GO:0001825//blastocyst formation;GO:0035265//organ growth;GO:0007286//spermatid development	GO:0005515//protein binding	GO:0043229//intracellular organelle	--
Unigene28030_sinensis	755	1	18	0.2378	5.1303	4.43122257130036	Up	7.16424e-06	0.000116809135633045	--	--	--	--	--	--	--	--	--	--	--	--	--	--	--	--	--	--	--	--	--	--	-	-	-	--
CL3220.Contig2_sinensis	949	1	18	0.1892	4.0815	4.4311154635188	Up	7.16424e-06	0.000116781805465606	gi|405955306|gb|EKC22471.1|	114.4	8e-24	Sacsin [Crassostrea gigas]	--	--	--	--	--	--	--	--	--	--	--	--	--	--	--	--	--	--	-	-	-	--
Unigene29829_sinensis	1257	7	125	0.9997	21.3988	4.4198908639047	Up	2.8764e-34	2.04277177981651e-32	--	--	--	--	--	--	--	--	--	--	--	--	--	--	--	--	--	--	--	--	--	--	-	-	-	--
Unigene36471_sinensis	317	2	35	1.1326	23.7588	4.39075163086196	Up	2.1019e-10	5.94307106737013e-09	--	--	--	--	--	--	--	--	--	--	--	--	--	--	--	--	--	--	--	--	--	--	-	-	-	--
CL8249.Contig2_sinensis	1088	2	35	0.3300	6.9224	4.39073437819286	Up	2.1019e-10	5.94548400730816e-09	--	--	--	--	--	--	--	--	--	--	--	--	--	--	--	--	--	--	--	--	--	--	-	-	-	--
Unigene26754_sinensis	937	2	35	0.3832	8.0379	4.39064916266532	Up	2.1019e-10	5.9406600851927e-09	gi|470440958|ref|XP_004339358.1|	61.2	8e-08	IgA-specific serine endopeptidase, putative [Acanthamoeba castellanii str. Neff] >gi|440796236|gb|ELR17345.1| IgA-specific serine endopeptidase, putative [Acanthamoeba castellanii str. Neff]	--	--	--	--	sp|Q9UF83|YM012_HUMAN	63.9	5e-10	Uncharacterized protein DKFZp434B061 OS=Homo sapiens PE=2 SV=2	--	--	--	--	--	K10955	1e-13	77.8	gga:423101	intestinal mucin-2	GO:0044260;GO:0006139//nucleobase-containing compound metabolic process	GO:0003824//catalytic activity	-	--
Unigene6194_sinensis	1046	3	52	0.5149	10.6976	4.37685108481995	Up	6.89998e-15	2.56929292688402e-13	gi|444725279|gb|ELW65852.1|	62.8	3e-08	Brain-specific homeobox protein like protein [Tupaia chinensis]	--	--	--	--	sp|C0H4W3|HEPF1_PLAF7	50.8	5e-06	Probable ATP-dependent helicase PF08_0048 OS=Plasmodium falciparum (isolate 3D7) GN=PF08_0048 PE=3 SV=1	--	--	--	--	--	--	--	--	--	--	-	-	-	--
Unigene6221_sinensis	2307	8	137	0.6225	12.7787	4.35952342839776	Up	4.16918e-37	3.11321116205788e-35	gi|405953470|gb|EKC21126.1|	70.9	3e-10	Zinc finger protein ZFAT [Crassostrea gigas]	--	--	--	--	sp|P18714|ZG20_XENLA	51.6	8e-06	Gastrula zinc finger protein xFG20-1 OS=Xenopus laevis PE=3 SV=2	--	--	--	--	--	--	--	--	--	--	-	-	-	--
Unigene2025_sinensis	1146	1	17	0.1566	3.1921	4.34934973032377	Up	1.4996e-05	0.000232168072	--	--	--	--	--	--	--	--	--	--	--	--	--	--	--	--	--	--	--	--	--	--	-	-	-	--
CL3841.Contig3_sinensis	2647	1	17	0.0678	1.3820	4.34932853213928	Up	1.4996e-05	0.00023175606122449	gi|405973393|gb|EKC38111.1|	567.4	1e-159	Neurogenic locus Notch protein [Crassostrea gigas]	--	--	--	--	sp|Q7L0X2|F194A_HUMAN	152	3e-36	Protein FAM194A OS=Homo sapiens GN=FAM194A PE=2 SV=1	--	--	--	--	--	--	--	--	--	--	-	-	-	--
CL4261.Contig1_sinensis	1038	1	17	0.1729	3.5242	4.34928602610779	Up	1.4996e-05	0.000232013396402398	gi|405964882|gb|EKC30324.1|	105.9	3e-21	BTB and MATH domain-containing protein 38, partial [Crassostrea gigas]	--	--	--	--	sp|Q20681|BAT38_CAEEL	74.3	4e-13	BTB and MATH domain-containing protein 38 OS=Caenorhabditis elegans GN=bath-38 PE=4 SV=1	--	--	--	--	--	K10481	3e-08	60.1	tca:660246	BTB/POZ domain-containing protein 9	-	-	-	--
Unigene21642_sinensis	843	1	17	0.2129	4.3395	4.34928096908582	Up	1.4996e-05	0.000232271303690529	gi|405964384|gb|EKC29877.1|	163.7	1e-38	Apoptosis 2 inhibitor [Crassostrea gigas]	--	--	--	--	sp|P18503|CAS4_EPHMU	55.8	1e-07	Short-chain collagen C4 (Fragment) OS=Ephydatia muelleri PE=2 SV=1	--	--	--	--	--	K03989	2e-23	110	bfo:BRAFLDRAFT_129974	complement component 4	-	-	-	--
Unigene14036_sinensis	1155	1	17	0.1554	3.1672	4.34914956362239	Up	1.4996e-05	0.000231910393784684	--	--	--	--	--	--	--	--	--	--	--	--	--	--	--	--	--	--	--	--	--	--	-	-	-	--
CL7070.Contig2_sinensis	523	1	17	0.3432	6.9946	4.34912009843683	Up	1.4996e-05	0.000231858926764314	--	--	--	--	--	--	--	--	--	--	--	--	--	--	--	--	--	--	--	--	--	--	-	-	-	--
CL106.Contig5_sinensis	1578	2	34	0.2275	4.6365	4.34909770449332	Up	4.3837e-10	1.20666928210194e-08	gi|405973904|gb|EKC38593.1|	317.8	1e-84	Spermatogenesis-associated protein 6 [Crassostrea gigas]	--	--	--	--	sp|Q2KJG1|SPAT6_BOVIN	135	2e-31	Spermatogenesis-associated protein 6 OS=Bos taurus GN=SPATA6 PE=2 SV=2	--	--	--	--	--	K12893	5e-07	56.6	bfo:BRAFLDRAFT_114372	splicing factor, arginine/serine-rich 4/5/6	-	-	-	--
Unigene19584_sinensis	702	1	17	0.2557	5.2111	4.34906387438139	Up	1.4996e-05	0.000232322953969313	gi|443699027|gb|ELT98701.1|	147.5	5e-34	hypothetical protein CAPTEDRAFT_191749 [Capitella teleta]	--	--	--	--	sp|Q8BG92|CLVS2_MOUSE	75.9	8e-14	Clavesin-2 OS=Mus musculus GN=Clvs2 PE=2 SV=1	--	--	--	--	--	--	--	--	--	--	-	-	-	--
Unigene23509_sinensis	1013	1	17	0.1772	3.6112	4.34902781463682	Up	1.4996e-05	0.000232064932030209	gi|405952599|gb|EKC20392.1|	107.1	1e-21	Tripartite motif-containing protein 56 [Crassostrea gigas]	--	--	--	--	sp|O08629|TIF1B_RAT	67.8	4e-11	Transcription intermediary factor 1-beta OS=Rattus norvegicus GN=Trim28 PE=1 SV=2	--	--	--	--	--	K12032	1e-12	74.3	mgp:100545833	tripartite motif-containing protein 66	-	-	-	--
CL590.Contig2_sinensis	1363	1	17	0.1317	2.6839	4.34900366815155	Up	1.4996e-05	0.000232219676372527	gi|380019564|ref|XP_003693674.1|	96.3	4e-18	PREDICTED: uncharacterized protein LOC100866265 [Apis florea]	gi|37361058|gb|AC107662.9|	75.8	5e-10	Mus musculus chromosome 9, clone RP23-99B22, complete sequence	--	--	--	--	--	--	--	--	--	--	--	--	--	--	-	-	-	--
Unigene21464_sinensis	597	2	34	0.6014	12.2552	4.34892535047015	Up	4.3837e-10	1.20619271445498e-08	gi|405960430|gb|EKC26355.1|	161.4	2e-38	Ovochymase-1 [Crassostrea gigas]	--	--	--	--	sp|P00760|TRY1_BOVIN	127	1e-29	Cationic trypsin OS=Bos taurus PE=1 SV=3	mlr3307	63.5	2e-10	COG5640	Secreted trypsin-like serine protease	K01312	2e-29	129	nve:NEMVE_v1g170524	trypsin [EC:3.4.21.4]	-	GO:0016787//hydrolase activity	-	--
Unigene7431_sinensis	599	1	17	0.2997	6.1071	4.34889647965292	Up	1.4996e-05	0.000232116490557654	--	--	--	--	--	--	--	--	--	--	--	--	--	--	--	--	--	--	--	--	--	--	-	-	-	--
Unigene11135_sinensis	460	3	51	1.1708	23.8576	4.34888236374817	Up	1.437104e-14	5.23374796529012e-13	gi|1353761|gb|AAB01786.1|	56.2	5e-07	myosin II heavy chain, partial [Naegleria fowleri]	--	--	--	--	--	--	--	--	--	--	--	--	--	K08823	8e-06	49.7	tca:659421	CDC-like kinase [EC:2.7.12.1]	-	-	-	--
CL5652.Contig1_sinensis	381	1	17	0.4712	9.6015	4.34884836504373	Up	1.4996e-05	0.00023196188365897	gi|186396|gb|AAA59163.1|	52.8	6e-06	mucin, partial [Homo sapiens]	--	--	--	--	sp|Q02817|MUC2_HUMAN	52.8	2e-07	Mucin-2 OS=Homo sapiens GN=MUC2 PE=1 SV=2	--	--	--	--	--	K10955	6e-07	52.8	hsa:4583	intestinal mucin-2	-	-	-	--
CL7578.Contig3_sinensis	306	1	17	0.5867	11.9548	4.34882319218791	Up	1.4996e-05	0.000231807482582649	--	--	--	--	--	--	--	--	--	--	--	--	--	--	--	--	--	--	--	--	--	--	-	-	-	--
Unigene3575_sinensis	1417	3	51	0.3801	7.7449	4.34879568114449	Up	1.437104e-14	5.23922546185243e-13	gi|405967546|gb|EKC32694.1|	234.2	1e-59	Interferon-induced protein 44-like protein [Crassostrea gigas]	--	--	--	--	sp|Q8TCB0|IFI44_HUMAN	120	7e-27	Interferon-induced protein 44 OS=Homo sapiens GN=IFI44 PE=2 SV=2	--	--	--	--	--	--	--	--	--	--	-	-	-	--
CL9297.Contig2_sinensis	1466	3	51	0.3674	7.4860	4.34877151667598	Up	1.437104e-14	5.23648528117155e-13	gi|405958476|gb|EKC24603.1|	79.7	4e-13	Putative ATP-dependent RNA helicase DDX58 [Crassostrea gigas]	--	--	--	--	--	--	--	--	--	--	--	--	--	--	--	--	--	--	-	-	-	--
Unigene185_sinensis	1191	2	34	0.3015	6.1430	4.34871347606384	Up	4.3837e-10	1.20714622648221e-08	--	--	--	--	--	--	--	--	--	--	--	--	--	--	--	--	--	--	--	--	--	--	-	-	-	--
Unigene4901_sinensis	2464	5	83	0.3643	7.2486	4.31450347864528	Up	7.61078e-23	3.99574552991711e-21	gi|405963457|gb|EKC29027.1|	311.2	1e-82	Putative ATP-dependent RNA helicase DDX58 [Crassostrea gigas]	--	--	--	--	sp|Q6Q899|DDX58_MOUSE	246	1e-64	Probable ATP-dependent RNA helicase DDX58 OS=Mus musculus GN=Ddx58 PE=1 SV=2	MJ1505_1	123	2e-27	COG1111	ERCC4-like helicases	K12646	7e-68	259	bfo:BRAFLDRAFT_249506	ATP-dependent RNA helicase DDX58 [EC:3.6.3.14]	-	GO:0005488//binding	-	--
Unigene27151_sinensis	2250	4	66	0.3191	6.3121	4.30603954782577	Up	2.14314e-18	9.3552895150376e-17	gi|334321619|ref|XP_001377853.2|	310.5	2e-82	PREDICTED: guanylate-binding protein 4-like [Monodelphis domestica]	--	--	--	--	sp|P32456|GBP2_HUMAN	297	6e-80	Interferon-induced guanylate-binding protein 2 OS=Homo sapiens GN=GBP2 PE=1 SV=3	--	--	--	--	--	--	--	--	--	--	GO:0019221//cytokine-mediated signaling pathway;GO:0006955//immune response	-	GO:0044424//intracellular part	--
CL5226.Contig2_sinensis	1098	2	33	0.3270	6.4674	4.30582330105903	Up	9.12952e-10	2.43415433938002e-08	gi|341902840|gb|EGT58775.1|	55.1	7e-06	hypothetical protein CAEBREN_21790 [Caenorhabditis brenneri]	--	--	--	--	--	--	--	--	--	--	--	--	--	--	--	--	--	--	-	-	-	--
Unigene26360_sinensis	863	3	49	0.6240	12.2180	4.291318306218	Up	6.2152e-14	2.19132980161943e-12	--	--	--	--	--	--	--	--	sp|P83503|NYX_MOUSE	49.7	8e-06	Nyctalopin OS=Mus musculus GN=Nyx PE=2 SV=1	--	--	--	--	--	K08129	2e-06	53.5	dre:568821	nyctalopin	-	-	-	--
Unigene22852_sinensis	1049	1	16	0.1711	3.2822	4.26175148683579	Up	3.13094e-05	0.000458351457995377	gi|340386878|ref|XP_003391935.1|	127.1	1e-27	PREDICTED: oligopeptide transport system permease protein oppB-like, partial [Amphimedon queenslandica]	--	--	--	--	sp|P98088|MUC5A_HUMAN	67.0	7e-11	Mucin-5AC (Fragments) OS=Homo sapiens GN=MUC5AC PE=1 SV=3	CAC3632	121	2e-27	COG4166	ABC-type oligopeptide transport system, periplasmic component	K10955	2e-07	57.4	gga:423101	intestinal mucin-2	GO:0044260;GO:0044281//small molecule metabolic process;GO:0006139//nucleobase-containing compound metabolic process	GO:1901363;GO:0016787//hydrolase activity;GO:0097159//organic cyclic compound binding	-	--
Unigene3024_sinensis	404	1	16	0.4443	8.5222	4.26161986279114	Up	3.13094e-05	0.000458640577922624	--	--	--	--	--	--	--	--	--	--	--	--	--	--	--	--	--	--	--	--	--	--	-	-	-	--
Unigene29258_sinensis	989	1	16	0.1815	3.4813	4.26158468990436	Up	3.13094e-05	0.000458062702351953	--	--	--	--	--	--	--	--	--	--	--	--	--	--	--	--	--	--	--	--	--	--	-	-	-	--
Unigene24110_sinensis	788	1	16	0.2278	4.3693	4.26156251374098	Up	3.13094e-05	0.000458255165672269	gi|60593111|gb|AAX28841.1|	134.8	4e-30	RNA-dependent DNA polymerase [Drosophila melanogaster]	--	--	--	--	sp|P10394|POL4_DROME	134	2e-31	Retrovirus-related Pol polyprotein from transposon 412 OS=Drosophila melanogaster GN=POL PE=4 SV=1	SPAC9.04	79.0	9e-15	COG2801	Transposase and inactivated derivatives	K09365	1e-14	80.9	xtr:100486226	POU domain transcription factor, class 3	-	-	-	--
CL6398.Contig2_sinensis	1524	7	112	0.8245	15.8142	4.2615572715547	Up	3.88146e-30	2.49692924044321e-28	gi|291225187|ref|XP_002732582.1|	192.2	6e-47	PREDICTED: expressed hypothetical protein-like [Saccoglossus kowalevskii]	--	--	--	--	--	--	--	--	SMc00183	77.8	5e-14	COG0431	Predicted flavoprotein	--	--	--	--	--	-	-	-	--
Unigene6145_sinensis	1181	2	32	0.3040	5.8306	4.26150112333805	Up	1.89845e-09	4.91319142087667e-08	--	--	--	--	--	--	--	--	--	--	--	--	--	--	--	--	--	--	--	--	--	--	-	-	-	--
CL8728.Contig2_sinensis	1073	1	16	0.1673	3.2087	4.26147955949712	Up	3.13094e-05	0.000458544164095018	gi|348504812|ref|XP_003439955.1|	174.9	6e-42	PREDICTED: lipid phosphate phosphohydrolase 3-like isoform 1 [Oreochromis niloticus]	--	--	--	--	sp|Q99JY8|LPP3_MOUSE	172	1e-42	Lipid phosphate phosphohydrolase 3 OS=Mus musculus GN=Ppap2b PE=1 SV=1	ECU10g1440	105	2e-22	COG0671	Membrane-associated phospholipid phosphatase	K01080	4e-42	172	mmu:67916	phosphatidate phosphatase [EC:3.1.3.4]	GO:0060070//canonical Wnt receptor signaling pathway;GO:0001568//blood vessel development;GO:0016337//cell-cell adhesion;GO:0051091//positive regulation of sequence-specific DNA binding transcription factor activity;GO:0050821//protein stabilization;GO:0001702//gastrulation with mouth forming second;GO:0030111//regulation of Wnt receptor signaling pathway;GO:0001933//negative regulation of protei…	GO:0005178//integrin binding;GO:0042577//lipid phosphatase activity	GO:0005789//endoplasmic reticulum membrane	--
Unigene33263_sinensis	480	2	32	0.7480	14.3458	4.26144634255062	Up	1.89845e-09	4.91501720735786e-08	--	--	--	--	--	--	--	--	--	--	--	--	--	--	--	--	--	--	--	--	--	--	-	-	-	--
CL5529.Contig2_sinensis	701	3	48	0.7683	14.7346	4.26139433228765	Up	1.290474e-13	4.4684907110338e-12	--	--	--	--	--	--	--	--	--	--	--	--	--	--	--	--	--	--	--	--	--	--	-	-	-	--
CL2707.Contig2_sinensis	479	1	16	0.3748	7.1879	4.26137747971591	Up	3.13094e-05	0.000458447790794451	--	--	--	--	--	--	--	--	--	--	--	--	--	--	--	--	--	--	--	--	--	--	-	-	-	--
CL5670.Contig3_sinensis	1774	1	16	0.1012	1.9408	4.2613702604262	Up	3.13094e-05	0.000457774310304302	gi|405955079|gb|EKC22329.1|	449.1	3e-124	Leucine-rich repeat-containing protein 27 [Crassostrea gigas]	--	--	--	--	sp|Q80YS5|LRC27_MOUSE	151	4e-36	Leucine-rich repeat-containing protein 27 OS=Mus musculus GN=Lrrc27 PE=2 SV=1	MA2301_1	69.7	2e-11	COG4886	Leucine-rich repeat (LRR) protein	K14837	1e-29	132	nve:NEMVE_v1g244547	nucleolar protein 12	-	-	-	--
Unigene6681_sinensis	415	1	16	0.4326	8.2963	4.26136249354175	Up	3.13094e-05	0.0004579665313038	--	--	--	--	--	--	--	--	--	--	--	--	--	--	--	--	--	--	--	--	--	--	-	-	-	--
CL5955.Contig1_sinensis	841	1	16	0.2135	4.0939	4.26116788771897	Up	3.13094e-05	0.000457870400629723	gi|405976657|gb|EKC41156.1|	103.6	1e-20	Hemicentin-1 [Crassostrea gigas]	--	--	--	--	sp|Q96RW7|HMCN1_HUMAN	84.3	3e-16	Hemicentin-1 OS=Homo sapiens GN=HMCN1 PE=1 SV=2	--	--	--	--	--	K06467	1e-20	100	xtr:100135351	CD22 antigen	GO:0048666//neuron development;GO:0009653//anatomical structure morphogenesis	GO:0005488//binding	GO:0044464//cell part	--
CL5589.Contig2_sinensis	1304	1	16	0.1377	2.6403	4.26110139830228	Up	3.13094e-05	0.000458158913799622	gi|123407101|ref|XP_001302933.1|	59.3	5e-07	hypothetical protein [Trichomonas vaginalis G3] >gi|121884268|gb|EAX90003.1| hypothetical protein TVAG_272650 [Trichomonas vaginalis G3]	--	--	--	--	sp|Q54X08|MYBV_DICDI	62.8	2e-09	Myb-like protein V OS=Dictyostelium discoideum GN=mybV PE=4 SV=2	SPAC140.02	52.0	2e-06	COG0724	RNA-binding proteins (RRM domain)	K04574	7e-10	65.9	xtr:100101753	neurofilament heavy polypeptide	-	-	-	--
Unigene25568_sinensis	522	26	415	8.9414	171.0774	4.25800463736002	Up	9.60218e-108	1.61587989956522e-105	--	--	--	--	--	--	--	--	--	--	--	--	--	--	--	--	--	--	--	--	--	--	-	-	-	--
CL622.Contig2_sinensis	750	8	127	1.9148	36.4382	4.25018607734622	Up	6.17364e-34	4.33143328459214e-32	gi|405963848|gb|EKC29386.1|	132.1	2e-29	hypothetical protein CGI_10012092 [Crassostrea gigas]	--	--	--	--	--	--	--	--	--	--	--	--	--	--	--	--	--	--	-	-	-	--
Unigene5264_sinensis	1313	4	63	0.5469	10.3250	4.23872090932124	Up	1.913754e-17	8.03672859710669e-16	--	--	--	--	--	--	--	--	--	--	--	--	--	--	--	--	--	--	--	--	--	--	-	-	-	--
CL2266.Contig1_sinensis	1587	3	47	0.3393	6.3729	4.23131668779848	Up	2.67646e-13	9.10479940136719e-12	gi|405963610|gb|EKC29172.1|	329.3	3e-88	Heat shock 70 kDa protein 12A [Crassostrea gigas]	--	--	--	--	sp|O43301|HS12A_HUMAN	204	6e-52	Heat shock 70 kDa protein 12A OS=Homo sapiens GN=HSPA12A PE=1 SV=2	Cj0759	60.8	6e-09	COG0443	Molecular chaperone	--	--	--	--	--	-	-	-	--
CL4829.Contig3_sinensis	1458	2	31	0.2462	4.5753	4.21596367631357	Up	3.94146e-09	9.84573598924345e-08	gi|405978193|gb|EKC42603.1|	91.3	1e-16	hypothetical protein CGI_10026670 [Crassostrea gigas]	--	--	--	--	sp|Q54GV8|Y8625_DICDI	102	2e-21	Uncharacterized transmembrane protein DDB_G0289901 OS=Dictyostelium discoideum GN=DDB_G0289901 PE=4 SV=1	XF0818	78.2	3e-14	COG2730	Endoglucanase	K07604	1e-20	102	cfa:490980	type I keratin, acidic	GO:0044699	GO:0005488//binding	-	--
CL5647.Contig2_sinensis	1219	4	62	0.5891	10.9447	4.21557604680296	Up	3.96352e-17	1.63878026635015e-15	gi|432920861|ref|XP_004080007.1|	67.0	2e-09	PREDICTED: complement C1q-like protein 4-like [Oryzias latipes]	--	--	--	--	--	--	--	--	--	--	--	--	--	--	--	--	--	--	-	-	-	--
Unigene26966_sinensis	495	3	46	1.0880	19.9971	4.20004033235038	Up	5.54456e-13	1.85624195406055e-11	gi|405975240|gb|EKC39821.1|	229.6	4e-59	Histone H2A [Crassostrea gigas]	gi|406823016|gb|JN797397.1|	85.7	2e-13	Dicranotropis hamata histone 2A (H2A) gene, partial cds	sp|Q6WV88|H2A_MYTGA	219	2e-57	Histone H2A OS=Mytilus galloprovincialis PE=3 SV=3	SPCC622.08c	192	3e-49	COG5262	Histone H2A	K11251	2e-58	224	isc:IscW_ISCW004478	histone H2A	GO:0006334//nucleosome assembly	GO:0003677//DNA binding;GO:0046982//protein heterodimerization activity	GO:0000786//nucleosome;GO:0005634//nucleus	--
Unigene13996_sinensis	843	1	15	0.2129	3.8289	4.16868212667775	Up	6.51852e-05	0.000892568337028302	gi|470296368|ref|XP_004345315.1|	61.6	5e-08	predicted protein [Capsaspora owczarzaki ATCC 30864] >gi|320164535|gb|EFW41434.1| predicted protein [Capsaspora owczarzaki ATCC 30864]	--	--	--	--	sp|Q9UF83|YM012_HUMAN	50.4	5e-06	Uncharacterized protein DKFZp434B061 OS=Homo sapiens PE=2 SV=2	--	--	--	--	--	K13908	2e-06	53.1	bta:789503	mucin-5B	-	-	-	--
Unigene1999_sinensis	845	1	15	0.2124	3.8199	4.16867919962609	Up	6.51852e-05	0.000893270593784422	--	--	--	--	--	--	--	--	--	--	--	--	--	--	--	--	--	--	--	--	--	--	-	-	-	--
Unigene22346_sinensis	774	1	15	0.2319	4.1703	4.16857644585021	Up	6.51852e-05	0.000892392945333071	gi|443688373|gb|ELT91085.1|	198.0	4e-49	hypothetical protein CAPTEDRAFT_125979, partial [Capitella teleta]	--	--	--	--	sp|Q9Z0Z3|SKP2_MOUSE	127	3e-29	S-phase kinase-associated protein 2 OS=Mus musculus GN=Skp2 PE=1 SV=1	--	--	--	--	--	K03875	3e-38	159	nvi:100121294	F-box and leucine-rich repeat protein 1 (S-phase kinase-associated protein 2)	GO:0007113//endomitotic cell cycle	-	GO:0019005//SCF ubiquitin ligase complex	--
Unigene6530_sinensis	428	1	15	0.4194	7.5416	4.1684718666532	Up	6.51852e-05	0.000893094926017699	--	--	--	--	--	--	--	--	--	--	--	--	--	--	--	--	--	--	--	--	--	--	-	-	-	--
Unigene27668_sinensis	587	1	15	0.3058	5.4988	4.16845650265532	Up	6.51852e-05	0.00089204236865056	gi|405961251|gb|EKC27083.1|	91.7	2e-17	Low affinity immunoglobulin epsilon Fc receptor [Crassostrea gigas]	--	--	--	--	sp|Q91ZW7|C209E_MOUSE	86.3	4e-17	CD209 antigen-like protein E OS=Mus musculus GN=Cd209e PE=2 SV=1	--	--	--	--	--	K06563	1e-16	86.3	mmu:170780	CD209 antigen	-	GO:0030246//carbohydrate binding	-	--
Unigene27220_sinensis	412	1	15	0.4357	7.8345	4.16843418606561	Up	6.51852e-05	0.000893446330670864	--	--	--	--	--	--	--	--	--	--	--	--	--	--	--	--	--	--	--	--	--	--	-	-	-	--
Unigene38147_sinensis	318	1	15	0.5645	10.1503	4.16840497678948	Up	6.51852e-05	0.000893798011966148	--	--	--	--	--	--	--	--	sp|Q5TYP4|CA112_DANRE	47.4	7e-06	Uncharacterized protein C1orf112 homolog OS=Danio rerio GN=si:dkey-97o5.1 PE=2 SV=1	--	--	--	--	--	--	--	--	--	--	-	-	-	--
Unigene5411_sinensis	690	3	45	0.7805	14.0339	4.16837354506018	Up	1.147232e-12	3.77011821735849e-11	gi|156357437|ref|XP_001624225.1|	109.8	1e-22	predicted protein [Nematostella vectensis] >gi|156210988|gb|EDO32125.1| predicted protein [Nematostella vectensis]	--	--	--	--	--	--	--	--	--	--	--	--	--	K03989	4e-21	101	bfo:BRAFLDRAFT_129974	complement component 4	-	-	-	--
CL2516.Contig2_sinensis	2450	15	225	1.0991	19.7620	4.16833440243674	Up	2.91408e-58	3.007719104e-56	gi|405975833|gb|EKC40375.1|	159.5	8e-37	Doublecortin domain-containing protein 2 [Crassostrea gigas]	--	--	--	--	sp|D3ZR10|DCDC2_RAT	94.4	1e-18	Doublecortin domain-containing protein 2 OS=Rattus norvegicus GN=Dcdc2 PE=2 SV=1	--	--	--	--	--	K10429	1e-06	56.2	ecb:100065720	microtubule-associated protein 1	GO:0044699	-	-	--
CL1704.Contig2_sinensis	877	1	15	0.2047	3.6805	4.16831876384102	Up	6.51852e-05	0.000893622136717828	gi|405960127|gb|EKC26074.1|	160.6	9e-38	hypothetical protein CGI_10023378 [Crassostrea gigas]	--	--	--	--	sp|Q52MA5|MID51_XENTR	55.1	2e-07	Mitochondrial dynamic protein MID51 OS=Xenopus tropicalis GN=smcr7l PE=2 SV=1	--	--	--	--	--	--	--	--	--	--	-	-	-	--
Unigene31028_sinensis	325	1	15	0.5524	9.9317	4.16825545897198	Up	6.51852e-05	0.000892743797680362	--	--	--	--	--	--	--	--	--	--	--	--	--	--	--	--	--	--	--	--	--	--	-	-	-	--
Unigene24168_sinensis	784	1	15	0.2290	4.1171	4.16820898718498	Up	6.51852e-05	0.000892919327329925	gi|334324960|ref|XP_001377372.2|	173.3	1e-41	PREDICTED: interferon-inducible GTPase 1-like [Monodelphis domestica]	--	--	--	--	sp|Q9QZ85|IIGP1_MOUSE	165	1e-40	Interferon-inducible GTPase 1 OS=Mus musculus GN=Iigp1 PE=1 SV=2	--	--	--	--	--	K14139	2e-22	106	cfa:481473	immunity-related GTPase family M protein [EC:3.6.5.-]	GO:0050829//defense response to Gram-negative bacterium;GO:0042832//defense response to protozoan;GO:0006184//GTP catabolic process;GO:0035458//cellular response to interferon-beta;GO:0010506//regulation of autophagy	GO:0005525//GTP binding;GO:0042802//identical protein binding;GO:0019003//GDP binding;GO:0003924//GTPase activity	GO:0020005//symbiont-containing vacuole membrane;GO:0005789//endoplasmic reticulum membrane	--
Unigene4203_sinensis	626	1	15	0.2868	5.1562	4.16819129525544	Up	6.51852e-05	0.000892217622554028	gi|355757024|gb|EHH60632.1|	82.8	1e-14	hypothetical protein EGM_12032, partial [Macaca fascicularis]	--	--	--	--	sp|Q8MP30|Y7791_DICDI	53.5	3e-07	Uncharacterized histidine-rich protein DDB_G0274557 OS=Dictyostelium discoideum GN=DDB_G0274557 PE=4 SV=1	PM0926	50.1	3e-06	COG4531	ABC-type Zn2+ transport system, periplasmic component/surface adhesin	K14713	5e-08	58.2	cin:100177251	solute carrier family 39 (zinc transporter), member 7	-	-	-	--
Unigene23196_sinensis	765	1	15	0.2347	4.2193	4.16811392250465	Up	6.51852e-05	0.00089186718358209	gi|270016158|gb|EFA12606.1|	96.7	1e-18	hypothetical protein TcasGA2_TC001846 [Tribolium castaneum]	--	--	--	--	sp|P20825|POL2_DROME	73.9	3e-13	Retrovirus-related Pol polyprotein from transposon 297 OS=Drosophila melanogaster GN=pol PE=4 SV=1	YIL082w-a_2	65.9	7e-11	COG2801	Transposase and inactivated derivatives	K00854	1e-10	67.0	spu:589304	xylulokinase [EC:2.7.1.17]	-	-	-	--
CL8556.Contig1_sinensis	1377	1	15	0.1304	2.3441	4.16801834218892	Up	6.51852e-05	0.000893973956456693	gi|405967546|gb|EKC32694.1|	234.6	9e-60	Interferon-induced protein 44-like protein [Crassostrea gigas]	--	--	--	--	sp|P27473|IFI44_PANTR	121	3e-27	Interferon-induced protein 44 OS=Pan troglodytes GN=IFI44 PE=1 SV=1	--	--	--	--	--	--	--	--	--	--	-	-	-	--
CL9137.Contig1_sinensis	538	2	29	0.6673	11.5993	4.11955842946625	Up	1.690136e-08	3.94604842439678e-07	--	--	--	--	--	--	--	--	sp|Q4LDE5|SVEP1_HUMAN	49.7	4e-06	Sushi, von Willebrand factor type A, EGF and pentraxin domain-containing protein 1 OS=Homo sapiens GN=SVEP1 PE=1 SV=3	--	--	--	--	--	K06838	2e-06	52.4	cfa:486818	slit 1	-	-	-	--
CL6260.Contig1_sinensis	2937	8	116	0.4890	8.4990	4.11938673214702	Up	1.800312e-30	1.1689276489096e-28	gi|291233895|ref|XP_002736893.1|	186.4	7e-45	PREDICTED: hypothetical protein [Saccoglossus kowalevskii]	--	--	--	--	--	--	--	--	--	--	--	--	--	K13163	5e-39	164	bfo:BRAFLDRAFT_130981	male-specific lethal 1	-	-	-	--
Unigene4781_sinensis	1209	2	29	0.2970	5.1616	4.11928350746751	Up	1.690136e-08	3.94737126999665e-07	gi|444725279|gb|ELW65852.1|	85.5	6e-15	Brain-specific homeobox protein like protein [Tupaia chinensis]	--	--	--	--	sp|Q54G14|Y0266_DICDI	63.2	1e-09	Uncharacterized protein DDB_G0290685 OS=Dictyostelium discoideum GN=DDB_G0290685 PE=2 SV=2	YLR106c	51.6	3e-06	COG5271	AAA ATPase containing von Willebrand factor type A (vWA) domain	K15076	7e-06	52.4	nvi:100123609	transcription elongation factor B, polypeptide 3	-	-	-	--
CL4773.Contig2_sinensis	1186	8	115	1.2109	20.8655	4.10696785963105	Up	3.7069e-30	2.38683933548983e-28	--	--	--	--	--	--	--	--	--	--	--	--	--	--	--	--	--	--	--	--	--	--	-	-	-	--
Unigene31527_sinensis	1514	3	43	0.3557	6.1116	4.10281724355684	Up	4.89286e-12	1.55653270931507e-10	--	--	--	--	--	--	--	--	--	--	--	--	--	--	--	--	--	--	--	--	--	--	-	-	-	--
CL712.Contig2_sinensis	935	41	584	7.8718	134.4052	4.09375157899563	Up	8.14752e-147	1.84895625693811e-144	gi|342182678|emb|CCC92157.1|	80.5	1e-13	unnamed protein product [Trypanosoma congolense IL3000]	--	--	--	--	sp|Q9JL04|FMN2_MOUSE	76.6	7e-14	Formin-2 OS=Mus musculus GN=Fmn2 PE=1 SV=2	Rv3876	56.2	8e-08	COG0455	ATPases involved in chromosome partitioning	K12826	2e-15	84.0	xla:379832	splicing factor 3A subunit 2	-	GO:0005488//binding	-	--
Unigene28457_sinensis	468	5	71	1.9179	32.6458	4.08929799099785	Up	4.66294e-19	2.10130897063389e-17	gi|385145414|emb|CCG28032.1|	317.0	1e-85	alpha tubulin 5 [Sepia officinalis]	gi|371923910|dbj|AK396527.1|	230	5e-57	Sus scrofa mRNA, clone: PST010046D08, expressed in prostate	sp|P06603|TBA1_DROME	315	3e-86	Tubulin alpha-1 chain OS=Drosophila melanogaster GN=alphaTub84B PE=2 SV=1	SPBC800.05c	243	1e-64	COG5023	Tubulin	K07374	1e-85	315	smm:Smp_090120.1	tubulin alpha	GO:0051258//protein polymerization;GO:0006184//GTP catabolic process;GO:0007017//microtubule-based process	GO:0003924//GTPase activity;GO:0005200//structural constituent of cytoskeleton;GO:0005525//GTP binding	GO:0005874//microtubule;GO:0005737//cytoplasm	--
CL5648.Contig1_sinensis	1569	7	99	0.8009	13.5777	4.08347318449252	Up	4.80794e-26	2.7751812084507e-24	gi|405951621|gb|EKC19518.1|	273.5	2e-71	hypothetical protein CGI_10008375 [Crassostrea gigas]	--	--	--	--	--	--	--	--	--	--	--	--	--	--	--	--	--	--	-	-	-	--
Unigene24303_sinensis	1610	2	28	0.2230	3.7424	4.06884815154476	Up	3.4901e-08	7.89710220526145e-07	gi|459660807|gb|EMH76107.1|	68.9	8e-10	IgA-specific serine endopeptidase, putative, partial [Entamoeba histolytica HM-1:IMSS-B]	gi|21751484|dbj|AK092800.1|	67.9	1e-07	Homo sapiens cDNA FLJ35481 fis, clone SMINT2008042	sp|Q07283|TRHY_HUMAN	190	9e-48	Trichohyalin OS=Homo sapiens GN=TCHH PE=1 SV=2	VC1837	112	1e-24	COG3064	Membrane protein involved in colicin uptake	K14822	2e-49	197	tgu:100219403	rRNA-processing protein CGR1	-	-	-	--
Unigene22736_sinensis	852	3	42	0.6321	10.6078	4.06882885507233	Up	1.00842e-11	3.16466725135135e-10	gi|443710882|gb|ELU04908.1|	109.0	2e-22	hypothetical protein CAPTEDRAFT_94552 [Capitella teleta]	--	--	--	--	sp|Q6NUC1|CNFNA_XENLA	80.1	6e-15	Cornifelin homolog A OS=Xenopus laevis GN=cnfn-a PE=3 SV=1	--	--	--	--	--	--	--	--	--	--	GO:0009987//cellular process;GO:0044699	-	-	--
Unigene4630_sinensis	410	2	28	0.8757	14.6957	4.06881355870493	Up	3.4901e-08	7.89966786549708e-07	--	--	--	--	--	--	--	--	--	--	--	--	--	--	--	--	--	--	--	--	--	--	-	-	-	--
Unigene9223_sinensis	754	2	28	0.4762	7.9910	4.06873652871737	Up	3.4901e-08	7.90223519337017e-07	gi|405978749|gb|EKC43113.1|	112.5	2e-23	hypothetical protein CGI_10022318 [Crassostrea gigas]	--	--	--	--	--	--	--	--	--	--	--	--	--	--	--	--	--	--	-	-	-	--
Unigene22365_sinensis	1437	3	42	0.3748	6.2894	4.06872953446183	Up	1.00842e-11	3.16324236740207e-10	gi|405960016|gb|EKC25969.1|	82.8	5e-14	hypothetical protein CGI_10014324 [Crassostrea gigas]	--	--	--	--	--	--	--	--	--	--	--	--	--	--	--	--	--	--	-	-	-	--
CL3182.Contig2_sinensis	1094	9	125	1.4768	24.5871	4.05735521872197	Up	2.1778e-32	1.48024534829268e-30	--	--	--	--	--	--	--	--	--	--	--	--	--	--	--	--	--	--	--	--	--	--	-	-	-	--
CL3971.Contig3_sinensis	6162	36	498	1.0488	17.3909	4.05152109999577	Up	1.694384e-124	3.20777279608696e-122	gi|291222949|ref|XP_002731477.1|	1515.8	0.0	PREDICTED: Upf1-like [Saccoglossus kowalevskii]	--	--	--	--	sp|Q9P2E3|ZNFX1_HUMAN	1361	0.0	NFX1-type zinc finger-containing protein 1 OS=Homo sapiens GN=ZNFX1 PE=1 SV=2	SPCC1739.03	342	4e-93	COG1112	Superfamily I DNA and RNA helicases and helicase subunits	K14326	9e-33	144	cbr:CBG08494	regulator of nonsense transcripts 1 [EC:3.6.4.-]	-	-	-	--
CL7972.Contig1_sinensis	1375	5	69	0.6528	10.7984	4.0480326964218	Up	1.97244e-18	8.63177904271357e-17	gi|405970468|gb|EKC35367.1|	77.0	2e-12	Carcinoembryonic antigen-related cell adhesion molecule 1 [Crassostrea gigas]	--	--	--	--	--	--	--	--	--	--	--	--	--	--	--	--	--	--	-	-	-	--
Unigene30341_sinensis	1523	12	165	1.4144	23.3130	4.04287258260242	Up	3.36162e-42	2.79142674350417e-40	gi|405966306|gb|EKC31606.1|	223.0	3e-56	Transcriptional repressor scratch 1 [Crassostrea gigas]	--	--	--	--	sp|Q9NQ03|SCRT2_HUMAN	117	7e-26	Transcriptional repressor scratch 2 OS=Homo sapiens GN=SCRT2 PE=2 SV=3	SPAC144.09c	65.9	2e-10	COG5048	FOG: Zn-finger	K09218	6e-27	122	dwi:Dwil_GK18253	snail, invertebrate	-	-	-	--
Unigene22734_sinensis	827	47	643	10.2022	167.3094	4.03556630979617	Up	8.6616e-160	2.13231452438162e-157	gi|405973133|gb|EKC37864.1|	100.9	7e-20	hypothetical protein CGI_10019413 [Crassostrea gigas]	--	--	--	--	sp|P61208|ARL4C_MOUSE	69.3	9e-12	ADP-ribosylation factor-like protein 4C OS=Mus musculus GN=Arl4c PE=2 SV=1	YBR164c	62.4	9e-10	COG1100	GTPase SAR1 and related small G proteins	K07947	1e-12	73.9	xtr:549461	ADP-ribosylation factor-like 4C	-	-	-	--
CL281.Contig3_sinensis	1372	12	163	1.5701	25.5652	4.02525295975939	Up	1.413884e-41	1.16297384174734e-39	gi|405970539|gb|EKC35435.1|	344.0	1e-92	Uncharacterized protein C13orf26-like protein [Crassostrea gigas]	--	--	--	--	sp|Q0VB26|TEX26_MOUSE	61.6	4e-09	Testis-expressed sequence 26 protein OS=Mus musculus GN=Tex26 PE=1 SV=1	--	--	--	--	--	--	--	--	--	--	-	-	-	--
CL464.Contig1_sinensis	944	7	95	1.3312	21.6554	4.02392757717438	Up	8.55912e-25	4.77426205988791e-23	--	--	--	--	--	--	--	--	--	--	--	--	--	--	--	--	--	--	--	--	--	--	-	-	-	--
Unigene34442_sinensis	5122	100	1353	3.5048	56.8425	4.01956598251452	Up	0	0	gi|405974279|gb|EKC38936.1|	1744.9	0.0	Tetratricopeptide repeat protein 28 [Crassostrea gigas]	--	--	--	--	sp|Q96AY4|TTC28_HUMAN	139	5e-32	Tetratricopeptide repeat protein 28 OS=Homo sapiens GN=TTC28 PE=1 SV=4	sll0499_2	77.0	3e-13	COG4995	Uncharacterized protein conserved in bacteria	K15839	5e-16	88.6	tgu:100228863	G-protein signaling modulator 1	-	-	-	--
CL10278.Contig1_sinensis	1469	19	257	2.3218	37.6466	4.0192039669712	Up	1.233788e-64	1.38416708811594e-62	gi|405967546|gb|EKC32694.1|	239.6	3e-61	Interferon-induced protein 44-like protein [Crassostrea gigas]	--	--	--	--	sp|Q8TCB0|IFI44_HUMAN	129	2e-29	Interferon-induced protein 44 OS=Homo sapiens GN=IFI44 PE=2 SV=2	slr0599	50.8	6e-06	COG0515	Serine/threonine protein kinase	K13909	4e-07	57.0	mcc:707153	mucin-7	-	-	-	--
Unigene7665_sinensis	975	2	27	0.3682	5.9590	4.01650871565109	Up	7.19234e-08	1.56392988595506e-06	--	--	--	--	--	--	--	--	--	--	--	--	--	--	--	--	--	--	--	--	--	--	-	-	-	--
CL2135.Contig1_sinensis	675	4	54	1.0638	17.2149	4.01635895324712	Up	1.295296e-14	4.73214352511799e-13	--	--	--	--	--	--	--	--	--	--	--	--	--	--	--	--	--	--	--	--	--	--	-	-	-	--
CL6172.Contig2_sinensis	1014	9	121	1.5933	25.6781	4.01044861667857	Up	3.85748e-31	2.55949308685714e-29	gi|405971354|gb|EKC36195.1|	195.3	4e-48	Mitotic apparatus protein p62 [Crassostrea gigas]	gi|470236977|ref|XM_004350392.1|	73.8	1e-09	Dictyostelium fasciculatum transcription initiation factor TFIID subunit (taf11) mRNA, complete cds	sp|Q9NLA3|ANO39_ASTPE	161	2e-39	Nucleoplasmin-like protein ANO39 OS=Asterina pectinifera PE=1 SV=1	YOR054c	59.3	1e-08	COG0452	Phosphopantothenoylcysteine synthetase/decarboxylase	K11276	1e-29	130	hmg:100215712	nucleophosmin 1	GO:0006996//organelle organization;GO:0006139//nucleobase-containing compound metabolic process;GO:0050794//regulation of cellular process;GO:0044767;GO:0043170	GO:0005515//protein binding	GO:0031981//nuclear lumen;GO:0043232	--
Unigene15262_sinensis	675	38	507	10.1060	161.6290	3.99940208416223	Up	1.655384e-125	3.16837768945055e-123	--	--	--	--	--	--	--	--	--	--	--	--	--	--	--	--	--	--	--	--	--	--	-	-	-	--
CL5236.Contig2_sinensis	1118	12	160	1.9268	30.7959	3.99845955691939	Up	1.215838e-40	9.73634685310345e-39	--	--	--	--	--	--	--	--	--	--	--	--	--	--	--	--	--	--	--	--	--	--	-	-	-	--
CL1350.Contig2_sinensis	964	3	40	0.5587	8.9289	3.99833672740056	Up	4.265e-11	1.27636720360825e-09	--	--	--	--	--	--	--	--	--	--	--	--	--	--	--	--	--	--	--	--	--	--	-	-	-	--
Unigene11713_sinensis	1331	5	66	0.6744	10.6704	3.98386591280606	Up	1.704162e-17	7.1825325092559e-16	--	--	--	--	--	--	--	--	--	--	--	--	--	--	--	--	--	--	--	--	--	--	-	-	-	--
Unigene36425_sinensis	276	2	26	1.3008	20.2712	3.96196042732377	Up	1.478982e-07	3.07947390789002e-06	--	--	--	--	--	--	--	--	--	--	--	--	--	--	--	--	--	--	--	--	--	--	-	-	-	--
Unigene4450_sinensis	530	2	26	0.6774	10.5563	3.96195245932218	Up	1.478982e-07	3.07855383800418e-06	gi|426344282|ref|XP_004038703.1|	77.8	2e-13	PREDICTED: zygote arrest protein 1 [Gorilla gorilla gorilla]	--	--	--	--	sp|Q86SH2|ZAR1_HUMAN	77.8	1e-14	Zygote arrest protein 1 OS=Homo sapiens GN=ZAR1 PE=2 SV=1	--	--	--	--	--	K14344	4e-08	57.8	gga:770263	solute carrier family 10 (sodium/bile acid cotransporter), member 4	-	-	-	--
CL2719.Contig1_sinensis	502	3	39	1.0728	16.7177	3.96192332944633	Up	8.75102e-11	2.55736079018456e-09	gi|405961405|gb|EKC27214.1|	53.5	4e-06	hypothetical protein CGI_10005085 [Crassostrea gigas]	--	--	--	--	--	--	--	--	--	--	--	--	--	--	--	--	--	--	-	-	-	--
Unigene28417_sinensis	1410	12	156	1.5278	23.8079	3.96191277014135	Up	2.12932e-39	1.65751502882682e-37	gi|471202473|ref|XP_004258067.1|	58.9	7e-07	centromeric protein E, putative [Entamoeba invadens IP1] >gi|440298665|gb|ELP91296.1| centromeric protein E, putative [Entamoeba invadens IP1]	--	--	--	--	sp|Q5DTM8|BRE1A_MOUSE	50.4	9e-06	E3 ubiquitin-protein ligase BRE1A OS=Mus musculus GN=Rnf20 PE=1 SV=2	--	--	--	--	--	K10696	7e-06	52.8	rno:313216	E3 ubiquitin-protein ligase BRE1 [EC:6.3.2.19]	-	-	-	--
CL1243.Contig5_sinensis	3972	3	39	0.1356	2.1129	3.96179540497415	Up	8.75102e-11	2.55843395879144e-09	gi|405957485|gb|EKC23692.1|	517.7	2e-144	Golgi-specific brefeldin A-resistance guanine nucleotide exchange factor 1 [Crassostrea gigas]	--	--	--	--	sp|F1MJR8|TEX14_BOVIN	272	4e-72	Inactive serine/threonine-protein kinase TEX14 OS=Bos taurus GN=TEX14 PE=2 SV=2	FN0178	64.3	2e-09	COG0666	FOG: Ankyrin repeat	K04422	4e-15	85.1	spu:590385	mitogen-activated protein kinase kinase kinase 13 [EC:2.7.11.25]	GO:0044763;GO:0016043//cellular component organization;GO:0065007//biological regulation	GO:0005488//binding	GO:0044464//cell part	--
Unigene29361_sinensis	1688	43	553	4.5730	70.4965	3.94633880831792	Up	2.25596e-135	4.69165603701492e-133	--	--	--	--	--	--	--	--	--	--	--	--	--	--	--	--	--	--	--	--	--	--	-	-	-	--
Unigene26801_sinensis	1972	25	321	2.2758	35.0278	3.94405469669012	Up	3.152e-79	4.28063719298246e-77	gi|405961011|gb|EKC26874.1|	163.7	3e-38	hypothetical protein CGI_10017957 [Crassostrea gigas]	--	--	--	--	--	--	--	--	--	--	--	--	--	--	--	--	--	--	-	-	-	--
CL10408.Contig1_sinensis	2006	16	205	1.4318	21.9906	3.94098507785512	Up	4.06136e-51	3.88135651358025e-49	gi|156144444|gb|ABU52892.1|	505.4	4e-141	palmitoyl-CoA oxidase [Mytilus galloprovincialis]	--	--	--	--	sp|P07872|ACOX1_RAT	457	4e-128	Peroxisomal acyl-coenzyme A oxidase 1 OS=Rattus norvegicus GN=Acox1 PE=1 SV=1	YGL205w	150	8e-36	COG1960	Acyl-CoA dehydrogenases	K00232	8e-131	468	xtr:548479	acyl-CoA oxidase [EC:1.3.3.6]	GO:0033540//fatty acid beta-oxidation using acyl-CoA oxidase;GO:0007283//spermatogenesis;GO:0055088//lipid homeostasis	GO:0016401//palmitoyl-CoA oxidase activity;GO:0005515//protein binding;GO:0050660//flavin adenine dinucleotide binding;GO:0005504//fatty acid binding	GO:0005739//mitochondrion;GO:0005778//peroxisomal membrane	--
Unigene21225_sinensis	1188	13	166	1.9644	30.0681	3.93607307428939	Up	1.24312e-41	1.02372254468085e-39	--	--	--	--	--	--	--	--	--	--	--	--	--	--	--	--	--	--	--	--	--	--	-	-	-	--
Unigene36959_sinensis	1031	27	344	4.7012	71.7984	3.93285073193918	Up	1.308948e-84	1.85729324260692e-82	--	--	--	--	--	--	--	--	sp|Q91X17|UROM_MOUSE	50.8	5e-06	Uromodulin OS=Mus musculus GN=Umod PE=1 SV=1	--	--	--	--	--	--	--	--	--	--	-	-	-	--
CL6400.Contig1_sinensis	1864	3	38	0.2889	4.3868	3.92452682447088	Up	1.792634e-10	5.10801710208589e-09	gi|156402329|ref|XP_001639543.1|	89.4	7e-16	predicted protein [Nematostella vectensis] >gi|156226672|gb|EDO47480.1| predicted protein [Nematostella vectensis]	--	--	--	--	sp|Q9NZJ4|SACS_HUMAN	268	4e-71	Sacsin OS=Homo sapiens GN=SACS PE=1 SV=2	--	--	--	--	--	--	--	--	--	--	-	-	-	--
CL9346.Contig1_sinensis	1290	3	38	0.4175	6.3388	3.92436164651253	Up	1.792634e-10	5.11010712545008e-09	gi|405957218|gb|EKC23446.1|	84.3	1e-14	Tripartite motif-containing protein 56 [Crassostrea gigas]	--	--	--	--	--	--	--	--	--	--	--	--	--	--	--	--	--	--	-	-	-	--
Unigene31853_sinensis	1621	14	177	1.5504	23.4966	3.92173963036457	Up	3.556e-44	3.03979096932515e-42	--	--	--	--	--	--	--	--	--	--	--	--	--	--	--	--	--	--	--	--	--	--	-	-	-	--
Unigene1419_sinensis	1059	2	25	0.3390	5.0799	3.90544291873498	Up	3.03424e-07	6.08148637974684e-06	gi|126143295|gb|ABN80093.1|	59.7	2e-07	5&apos; nucleotidase [Glossina morsitans morsitans]	--	--	--	--	sp|Q54I18|SMEK_DICDI	62.8	1e-09	Suppressor of Mek1 OS=Dictyostelium discoideum GN=smkA PE=1 SV=1	--	--	--	--	--	--	--	--	--	--	-	-	-	--
CL5374.Contig3_sinensis	1069	2	25	0.3359	5.0324	3.90514289861507	Up	3.03424e-07	6.07973731837791e-06	gi|405962309|gb|EKC28000.1|	239.6	2e-61	Endothelin-converting enzyme 1 [Crassostrea gigas]	--	--	--	--	sp|Q61391|NEP_MOUSE	126	9e-29	Neprilysin OS=Mus musculus GN=Mme PE=1 SV=3	MA2001	85.9	1e-16	COG3590	Predicted metalloendopeptidase	K01415	5e-34	145	phu:Phum_PHUM135440	endothelin-converting enzyme [EC:3.4.24.71]	-	-	-	--
Unigene30772_sinensis	1055	3	37	0.5105	7.5468	3.8858821752068	Up	3.66592e-10	1.0171285562724e-08	--	--	--	--	gi|410442562|ref|NG_032972.1|	61.9	6e-06	Homo sapiens zinc finger protein 423 (ZNF423), RefSeqGene on chromosome 16	--	--	--	--	--	--	--	--	--	--	--	--	--	--	-	-	-	--
Unigene2098_sinensis	887	3	37	0.6072	8.9762	3.88586112533399	Up	3.66592e-10	1.01753378677291e-08	gi|390333414|ref|XP_003723705.1|	108.2	5e-22	PREDICTED: uncharacterized protein LOC100892093 [Strongylocentrotus purpuratus]	--	--	--	--	--	--	--	--	--	--	--	--	--	--	--	--	--	--	-	-	-	--
CL6130.Contig1_sinensis	2549	3	37	0.2113	3.1235	3.88579885751794	Up	3.66592e-10	1.01672364840764e-08	gi|405951312|gb|EKC19236.1|	419.9	3e-115	UPF0638 protein B [Crassostrea gigas]	--	--	--	--	sp|Q497Q6|F228B_MOUSE	121	9e-27	Protein FAM228B OS=Mus musculus GN=Fam228b PE=2 SV=1	--	--	--	--	--	--	--	--	--	--	-	-	-	--
Unigene5613_sinensis	959	17	209	3.1822	46.8967	3.88138999113918	Up	1.705434e-51	1.63658238768595e-49	gi|405964930|gb|EKC30368.1|	115.5	3e-24	hypothetical protein CGI_10019782 [Crassostrea gigas]	--	--	--	--	sp|H3BMG3|SMKR1_HUMAN	62.8	1e-09	Small lysine-rich protein 1 OS=Homo sapiens GN=SMKR1 PE=4 SV=1	--	--	--	--	--	--	--	--	--	--	-	-	-	--
CL6567.Contig2_sinensis	8752	55	672	1.1281	16.5225	3.872465130083	Up	9.28006e-162	2.30904464335714e-159	gi|405966381|gb|EKC31674.1|	4271.5	0.0	Dynein heavy chain 6, axonemal [Crassostrea gigas]	gi|326663947|ref|XM_001921217.3|	176	1e-39	PREDICTED: Danio rerio dynein, axonemal, heavy chain 6 (dnah6), mRNA	sp|Q9C0G6|DYH6_HUMAN	3760	0.0	Dynein heavy chain 6, axonemal OS=Homo sapiens GN=DNAH6 PE=1 SV=3	YKR054c	657	0.0	COG5245	Dynein, heavy chain	K10408	0.0	2259	dre:100317899	dynein heavy chain, axonemal	GO:0006200//ATP catabolic process;GO:0001539//ciliary or flagellar motility;GO:0007018//microtubule-based movement	GO:0003777//microtubule motor activity;GO:0005524//ATP binding;GO:0016887//ATPase activity	GO:0035085//cilium axoneme;GO:0005858//axonemal dynein complex;GO:0005874//microtubule	--
Unigene29747_sinensis	900	35	424	6.9812	101.3767	3.86010725425652	Up	1.975322e-102	3.16364846937931e-100	gi|405957124|gb|EKC23357.1|	367.5	5e-100	hypothetical protein CGI_10008733 [Crassostrea gigas]	--	--	--	--	--	--	--	--	--	--	--	--	--	--	--	--	--	--	-	-	-	--
CL1738.Contig1_sinensis	3675	43	519	2.1005	30.3896	3.85477299472228	Up	7.11584e-125	1.35082685820163e-122	gi|405974864|gb|EKC39476.1|	498.8	9e-139	Kyphoscoliosis peptidase [Crassostrea gigas]	--	--	--	--	sp|Q8C8H8|KY_MOUSE	120	2e-26	Kyphoscoliosis peptidase OS=Mus musculus GN=Ky PE=1 SV=1	sll1681	78.2	1e-13	COG5279	Uncharacterized protein involved in cytokinesis, contains TGc (transglutaminase/protease-like) domain	K14786	7e-30	134	smm:Smp_133510	protein KRI1	-	-	-	--
CL7468.Contig1_sinensis	734	2	24	0.4891	7.0361	3.84657461735338	Up	6.20956e-07	1.1944059515185e-05	gi|25143299|ref|NP_492875.2|	56.2	1e-06	Protein RSR-1 [Caenorhabditis elegans] >gi|19571645|emb|CAB04214.3| Protein RSR-1 [Caenorhabditis elegans]	--	--	--	--	sp|Q8BTI8|SRRM2_MOUSE	49.7	6e-06	Serine/arginine repetitive matrix protein 2 OS=Mus musculus GN=Srrm2 PE=1 SV=3	--	--	--	--	--	K13171	2e-07	56.2	cel:F28D9.1	serine/arginine repetitive matrix protein 1	-	-	-	--
Unigene2057_sinensis	553	2	24	0.6492	9.3390	3.84653317252973	Up	6.20956e-07	1.19506584430939e-05	--	--	--	--	--	--	--	--	--	--	--	--	--	--	--	--	--	--	--	--	--	--	-	-	-	--
Unigene4279_sinensis	839	2	24	0.4279	6.1555	3.84653046487335	Up	6.20956e-07	1.19407627833287e-05	gi|405949963|gb|EKC17973.1|	256.1	1e-66	Src kinase-associated phosphoprotein 2-A [Crassostrea gigas]	gi|328714069|ref|XM_001949164.2|	61.9	5e-06	PREDICTED: Acyrthosiphon pisum cyclin-dependent kinase-like 1-like (LOC100164168), mRNA	sp|Q55GU0|Y9955_DICDI	115	9e-26	Probable serine/threonine-protein kinase DDB_G0267514 OS=Dictyostelium discoideum GN=DDB_G0267514 PE=3 SV=1	YAR019c	80.5	3e-15	COG0515	Serine/threonine protein kinase	K10645	4e-32	138	spu:579155	E3 ubiquitin-protein ligase mind-bomb [EC:6.3.2.19]	-	GO:0016772//transferase activity, transferring phosphorus-containing groups	-	--
Unigene38388_sinensis	491	2	24	0.7312	10.5183	3.84649167003978	Up	6.20956e-07	1.1947358067937e-05	gi|354475331|ref|XP_003499883.1|	55.1	1e-06	PREDICTED: LOW QUALITY PROTEIN: formin-2-like [Cricetulus griseus]	--	--	--	--	sp|Q0GNC1|INF2_MOUSE	51.6	8e-07	Inverted formin-2 OS=Mus musculus GN=Inf2 PE=1 SV=1	--	--	--	--	--	--	--	--	--	--	-	-	-	--
Unigene3376_sinensis	1724	4	48	0.4165	5.9913	3.84648067410757	Up	9.48516e-13	3.13185598123223e-11	gi|124810268|ref|XP_001348818.1|	65.5	1e-08	conserved Plasmodium protein, unknown function [Plasmodium falciparum 3D7] >gi|23497718|gb|AAN37257.1| conserved Plasmodium protein, unknown function [Plasmodium falciparum 3D7]	--	--	--	--	sp|Q54J55|MYBX_DICDI	52.4	3e-06	Myb-like protein X OS=Dictyostelium discoideum GN=mybX PE=3 SV=1	--	--	--	--	--	K12811	1e-06	55.8	hmg:100202415	ATP-dependent RNA helicase DDX46/PRP5 [EC:3.6.4.13]	-	-	-	--
Unigene25718_sinensis	751	3	36	0.7171	10.3152	3.84645366589246	Up	7.48336e-10	2.01296605343629e-08	--	--	--	--	--	--	--	--	--	--	--	--	--	--	--	--	--	--	--	--	--	--	-	-	-	--
Unigene8505_sinensis	2204	12	144	0.9774	14.0594	3.84644211235344	Up	1.09443e-35	7.9840674e-34	gi|405959352|gb|EKC25399.1|	448.4	7e-124	UPF0394 inner membrane protein yeeE [Crassostrea gigas]	--	--	--	--	--	--	--	--	yeeE	75.1	5e-13	COG2391	Predicted transporter component	--	--	--	--	--	-	-	-	--
CL10321.Contig1_sinensis	1053	6	72	1.0229	14.7136	3.8464132588869	Up	1.644684e-18	7.22013166956522e-17	gi|225542822|gb|ACN91294.1|	60.5	1e-07	dentin sialophosphoprotein precursor [Oryctolagus cuniculus]	--	--	--	--	sp|Q75JC9|Y8484_DICDI	78.2	3e-14	Uncharacterized protein DDB_G0271670 OS=Dictyostelium discoideum GN=DDB_G0271670 PE=4 SV=1	XF1267	57.4	4e-08	COG5297	Cellobiohydrolase A (1,4-beta-cellobiosidase A)	K14438	8e-11	68.6	tgu:100222800	chromodomain-helicase-DNA-binding protein 9 [EC:3.6.4.12]	GO:0044699	-	-	--
CL7186.Contig1_sinensis	433	2	24	0.8292	11.9272	3.84639147258566	Up	6.20956e-07	1.19374678708609e-05	gi|339899199|ref|XP_001468869.2|	52.8	6e-06	proteophosphoglycan 5 [Leishmania infantum JPCM5] >gi|321398713|emb|CAM71961.2| proteophosphoglycan 5 [Leishmania infantum JPCM5]	--	--	--	--	--	--	--	--	--	--	--	--	--	--	--	--	--	--	-	-	-	--
Unigene29485_sinensis	959	3	36	0.5616	8.0779	3.84636544561802	Up	7.48336e-10	2.01374356060255e-08	--	--	--	--	--	--	--	--	--	--	--	--	--	--	--	--	--	--	--	--	--	--	-	-	-	--
Unigene33922_sinensis	1507	13	155	1.5486	22.1327	3.83714300594568	Up	3.10134e-38	2.35367381764706e-36	gi|74876134|sp|Q75JC9.1|Y8484_DICDI	66.2	5e-09	RecName: Full=Uncharacterized protein DDB_G0271670; Flags: Precursor	--	--	--	--	sp|Q75JC9|Y8484_DICDI	66.2	2e-10	Uncharacterized protein DDB_G0271670 OS=Dictyostelium discoideum GN=DDB_G0271670 PE=4 SV=1	--	--	--	--	--	--	--	--	--	--	-	-	-	--
Unigene35234_sinensis	1538	12	143	1.4006	20.0076	3.83643122227635	Up	2.22352e-35	1.60528927336788e-33	gi|328782703|ref|XP_395559.4|	56.2	5e-06	PREDICTED: hypothetical protein LOC412093 [Apis mellifera]	--	--	--	--	--	--	--	--	--	--	--	--	--	K00907	2e-06	55.1	dme:Dmel_CG18255	myosin-light-chain kinase [EC:2.7.11.18]	-	-	-	--
CL6398.Contig3_sinensis	1611	13	154	1.4486	20.5703	3.82783164894674	Up	6.29738e-38	4.74818362792208e-36	gi|291225187|ref|XP_002732582.1|	192.2	6e-47	PREDICTED: expressed hypothetical protein-like [Saccoglossus kowalevskii]	--	--	--	--	--	--	--	--	SMc00183	77.8	5e-14	COG0431	Predicted flavoprotein	--	--	--	--	--	-	-	-	--
Unigene32415_sinensis	2943	49	580	2.9889	42.4085	3.82666692081868	Up	1.497138e-138	3.18972805266055e-136	gi|354481857|ref|XP_003503117.1|	58.2	3e-06	PREDICTED: hypothetical protein LOC100763491 [Cricetulus griseus]	--	--	--	--	sp|Q54K36|Y7557_DICDI	54.3	2e-06	Uncharacterized protein DDB_G0287625 OS=Dictyostelium discoideum GN=DDB_G0287625 PE=4 SV=1	--	--	--	--	--	K12850	1e-05	53.5	rno:499691	pre-mRNA-splicing factor 38B	-	-	-	--
Unigene7728_sinensis	689	7	82	1.8238	25.6100	3.81168781723915	Up	9.14696e-21	4.43774064233983e-19	gi|405963611|gb|EKC29173.1|	198.0	3e-49	Heat shock 70 kDa protein 12B [Crassostrea gigas]	--	--	--	--	sp|Q96MM6|HS12B_HUMAN	123	3e-28	Heat shock 70 kDa protein 12B OS=Homo sapiens GN=HSPA12B PE=2 SV=2	--	--	--	--	--	--	--	--	--	--	-	-	-	--
CL8167.Contig2_sinensis	1013	3	35	0.5316	7.4349	3.80590032831771	Up	1.524726e-09	3.98746755608108e-08	gi|405976588|gb|EKC41089.1|	221.9	4e-56	Serine/threonine-protein kinase PAK 1 [Crassostrea gigas]	--	--	--	--	sp|O88643|PAK1_MOUSE	199	8e-51	Serine/threonine-protein kinase PAK 1 OS=Mus musculus GN=Pak1 PE=1 SV=1	YAR019c	123	6e-28	COG0515	Serine/threonine protein kinase	K04409	9e-52	204	api:100160077	p21-activated kinase 1 [EC:2.7.11.1]	-	GO:0016301//kinase activity	-	--
Unigene6104_sinensis	799	3	35	0.6740	9.4262	3.80585579547927	Up	1.524726e-09	3.98896491528351e-08	gi|390348826|ref|XP_780029.3|	211.8	2e-53	PREDICTED: meiotic recombination protein SPO11-like isoform 1 [Strongylocentrotus purpuratus]	--	--	--	--	sp|Q9Y5K1|SPO11_HUMAN	200	3e-51	Meiotic recombination protein SPO11 OS=Homo sapiens GN=SPO11 PE=2 SV=1	PAE2219	111	1e-24	COG1697	DNA topoisomerase VI, subunit A	K10878	4e-54	211	spu:579828	meiotic recombination protein SPO11	GO:0007141//male meiosis I;GO:0007286//spermatid development;GO:0007292//female gamete generation;GO:0034502//protein localization to chromosome;GO:0001541//ovarian follicle development;GO:0007129//synapsis;GO:0007131//reciprocal meiotic recombination	GO:0097159//organic cyclic compound binding;GO:1901363;GO:0003824//catalytic activity	GO:0000781//chromosome, telomeric region	--
CL9470.Contig1_sinensis	1118	3	35	0.4817	6.7366	3.80581380973421	Up	1.524726e-09	3.99046339947408e-08	--	--	--	--	--	--	--	--	--	--	--	--	--	--	--	--	--	--	--	--	--	--	-	-	-	--
CL3379.Contig2_sinensis	1452	6	70	0.7418	10.3740	3.80579819674779	Up	6.79522e-18	2.91333035187692e-16	gi|291230532|ref|XP_002735210.1|	210.7	1e-52	PREDICTED: MGC84161 protein-like [Saccoglossus kowalevskii]	--	--	--	--	sp|O42282|RDS2_CHICK	180	8e-45	Photoreceptor outer segment membrane glycoprotein 2 OS=Gallus gallus PE=2 SV=1	--	--	--	--	--	K07607	1e-49	197	spu:761646	peripherin	-	-	-	--
CL10117.Contig1_sinensis	1669	3	35	0.3227	4.5126	3.80569341978931	Up	1.524726e-09	3.99196300992108e-08	--	--	--	--	--	--	--	--	--	--	--	--	--	--	--	--	--	--	--	--	--	--	-	-	-	--
CL3109.Contig3_sinensis	3630	15	174	0.7418	10.3147	3.79752778340965	Up	2.09024e-42	1.73984385376344e-40	gi|405970093|gb|EKC35028.1|	1679.5	0.0	Tetratricopeptide repeat protein 18 [Crassostrea gigas]	gi|390333525|ref|XM_003723685.1|	155	2e-33	PREDICTED: Strongylocentrotus purpuratus tetratricopeptide repeat domain 18, transcript variant 1 (ttc18), mRNA	sp|Q5T0N1|TTC18_HUMAN	939	0.0	Tetratricopeptide repeat protein 18 OS=Homo sapiens GN=TTC18 PE=2 SV=2	MTH1585	60.1	3e-08	COG0457	FOG: TPR repeat	K03350	7e-09	64.3	dmo:Dmoj_GI13353	anaphase-promoting complex subunit 3	-	-	-	--
CL7334.Contig1_sinensis	820	2	23	0.4378	6.0357	3.78517723992622	Up	1.267398e-06	2.33655335437947e-05	--	--	--	--	--	--	--	--	--	--	--	--	--	--	--	--	--	--	--	--	--	--	-	-	-	--
CL179.Contig2_sinensis	1398	2	23	0.2568	3.5403	3.78515450984671	Up	1.267398e-06	2.33346594244186e-05	gi|471198454|ref|XP_004256129.1|	59.3	5e-07	hypothetical protein EIN_233190 [Entamoeba invadens IP1] >gi|440296557|gb|ELP89358.1| hypothetical protein EIN_233190 [Entamoeba invadens IP1]	--	--	--	--	sp|Q9NJ15|PCSK5_BRACL	87.8	5e-17	Proprotein convertase subtilisin/kexin type 5 OS=Branchiostoma californiense GN=PC6 PE=2 SV=1	--	--	--	--	--	K08654	1e-17	91.7	mdo:100019619	proprotein convertase subtilisin/kexin type 5 [EC:3.4.21.-]	-	-	-	--
CL6547.Contig1_sinensis	969	2	23	0.3705	5.1076	3.78510009763718	Up	1.267398e-06	2.33593521857143e-05	--	--	--	--	--	--	--	--	--	--	--	--	--	--	--	--	--	--	--	--	--	--	-	-	-	--
Unigene27772_sinensis	550	2	23	0.6528	8.9987	3.7850036346848	Up	1.267398e-06	2.33531740973287e-05	--	--	--	--	--	--	--	--	--	--	--	--	--	--	--	--	--	--	--	--	--	--	-	-	-	--
Unigene11344_sinensis	505	2	23	0.7110	9.8006	3.78494860983451	Up	1.267398e-06	2.33717181741662e-05	--	--	--	--	--	--	--	--	--	--	--	--	--	--	--	--	--	--	--	--	--	--	-	-	-	--
CL6890.Contig1_sinensis	2629	2	23	0.1366	1.8826	3.78469711130789	Up	1.267398e-06	2.33469992760444e-05	gi|260836523|ref|XP_002613255.1|	149.8	7e-34	hypothetical protein BRAFLDRAFT_68220 [Branchiostoma floridae] >gi|229298640|gb|EEN69264.1| hypothetical protein BRAFLDRAFT_68220 [Branchiostoma floridae]	--	--	--	--	sp|P13535|MYH8_HUMAN	53.1	3e-06	Myosin-8 OS=Homo sapiens GN=MYH8 PE=1 SV=3	--	--	--	--	--	K00907	1e-08	62.8	dan:Dana_GF13333	myosin-light-chain kinase [EC:2.7.11.18]	-	-	-	--
CL9919.Contig2_sinensis	3036	2	23	0.1183	1.6302	3.78452699260334	Up	1.267398e-06	2.33408277192704e-05	gi|405959510|gb|EKC25540.1|	1180.6	0.0	Kinesin-like protein KIF16B [Crassostrea gigas]	--	--	--	--	sp|Q90640|KIF4_CHICK	147	2e-34	Chromosome-associated kinesin KIF4 OS=Gallus gallus GN=KIF4 PE=2 SV=1	SPAC25G10.07c	120	1e-26	COG5059	Kinesin-like protein	K10395	1e-34	149	tca:656476	kinesin family member 4/7/21/27	-	GO:0003824//catalytic activity	-	--
Unigene31082_sinensis	1184	5	57	0.7581	10.3595	3.77242239797604	Up	1.03813e-14	3.81463496677215e-13	--	--	--	--	--	--	--	--	--	--	--	--	--	--	--	--	--	--	--	--	--	--	-	-	-	--
CL3248.Contig3_sinensis	2016	3	34	0.2671	3.6291	3.76415992980058	Up	3.10048e-09	7.84055684646098e-08	gi|405972517|gb|EKC37281.1|	741.1	0.0	Coiled-coil domain-containing protein 37 [Crassostrea gigas]	gi|390367859|ref|XM_781866.3|	77.8	2e-10	PREDICTED: Strongylocentrotus purpuratus coiled-coil domain-containing protein 37-like (LOC581889), mRNA	sp|Q494V2|CCD37_HUMAN	445	2e-124	Coiled-coil domain-containing protein 37 OS=Homo sapiens GN=CCDC37 PE=2 SV=1	AF1032	75.9	2e-13	COG0419	ATPase involved in DNA repair	K10388	1e-18	95.5	dre:567639	plectin	-	-	-	--
Unigene9301_sinensis	1679	3	34	0.3208	4.3576	3.76378772538552	Up	3.10048e-09	7.84340381699346e-08	gi|189310186|emb|CAP20050.1|	33.5	1e-36	transposase [Portunus pelagicus]	--	--	--	--	sp|Q7JQ07|MOS1T_DROMA	74.7	6e-13	Mariner Mos1 transposase OS=Drosophila mauritiana GN=mariner\T PE=1 SV=1	--	--	--	--	--	K11433	2e-17	88.6	bta:534913	histone-lysine N-methyltransferase SETMAR [EC:2.1.1.43]	-	-	-	--
Unigene8860_sinensis	2247	24	271	1.9174	25.9526	3.75865583627675	Up	1.105854e-64	1.24264100525806e-62	gi|405971497|gb|EKC36332.1|	1092.4	0.0	hypothetical protein CGI_10027229 [Crassostrea gigas]	gi|390361828|ref|XM_775179.3|	95.6	9e-16	PREDICTED: Strongylocentrotus purpuratus UPF0704 protein C6orf165 homolog, transcript variant 1 (LOC580002), mRNA	sp|Q29RL1|CF165_BOVIN	764	0.0	UPF0704 protein C6orf165 homolog OS=Bos taurus PE=2 SV=2	--	--	--	--	--	--	--	--	--	--	-	-	-	--
Unigene7569_sinensis	1154	12	135	1.8667	25.1735	3.75334382194536	Up	6.33024e-33	4.34932436449704e-31	--	--	--	--	--	--	--	--	--	--	--	--	--	--	--	--	--	--	--	--	--	--	-	-	-	--
CL3379.Contig1_sinensis	2937	9	101	0.5501	7.4000	3.74975946264571	Up	5.82052e-25	3.26497429855072e-23	gi|291230532|ref|XP_002735210.1|	210.7	3e-52	PREDICTED: MGC84161 protein-like [Saccoglossus kowalevskii]	--	--	--	--	sp|O42282|RDS2_CHICK	180	2e-44	Photoreceptor outer segment membrane glycoprotein 2 OS=Gallus gallus PE=2 SV=1	--	--	--	--	--	K07607	3e-49	197	spu:761646	peripherin	-	-	-	--
CL857.Contig1_sinensis	4803	5	56	0.1869	2.5089	3.7467164946067	Up	2.10406e-14	7.59128721595029e-13	gi|405968936|gb|EKC33959.1|	89.4	2e-15	Serine/threonine-protein kinase Nek8 [Crassostrea gigas]	gi|260786460|ref|XM_002588230.1|	101	3e-17	Branchiostoma floridae hypothetical protein, mRNA	sp|Q91ZR4|NEK8_MOUSE	444	1e-123	Serine/threonine-protein kinase Nek8 OS=Mus musculus GN=Nek8 PE=1 SV=1	YAR018c	128	8e-29	COG0515	Serine/threonine protein kinase	K08857	7e-137	489	cel:Y39G10AR.3	NIMA (never in mitosis gene a)-related kinase [EC:2.7.11.1]	GO:0044763;GO:0061326//renal tubule development;GO:0072116//pronephros formation;GO:0001947//heart looping	GO:0005488//binding;GO:0004672//protein kinase activity	GO:0072372//primary cilium	--
Unigene6013_sinensis	1797	13	145	1.2987	17.3634	3.74090936410006	Up	3.61194e-35	2.60227764074457e-33	gi|405951163|gb|EKC19100.1|	776.2	0.0	Putative adenylate kinase-like protein C9orf98-like protein [Crassostrea gigas]	--	--	--	--	sp|Q6P618|KAD8_XENTR	539	7e-153	Adenylate kinase 8 OS=Xenopus tropicalis GN=ak8 PE=2 SV=1	FN1298	142	1e-33	COG0563	Adenylate kinase and related kinases	K00939	3e-140	499	nve:NEMVE_v1g98446	adenylate kinase [EC:2.7.4.3]	GO:0016310//phosphorylation;GO:0006139//nucleobase-containing compound metabolic process;GO:0007165//signal transduction	GO:0004017//adenylate kinase activity;GO:0005524//ATP binding;GO:0004127//cytidylate kinase activity;GO:0008603//cAMP-dependent protein kinase regulator activity	GO:0005737//cytoplasm	--
Unigene4052_sinensis	2089	42	468	3.6092	48.2084	3.73953355259904	Up	4.43138e-110	7.62295835111111e-108	gi|405960808|gb|EKC26683.1|	177.6	2e-42	E3 ubiquitin-protein ligase MARCH3 [Crassostrea gigas]	--	--	--	--	sp|Q8TCQ1|MARH1_HUMAN	57.0	2e-07	E3 ubiquitin-protein ligase MARCH1 OS=Homo sapiens GN=MARCH1 PE=1 SV=1	--	--	--	--	--	K10656	5e-08	60.5	aag:AaeL_AAEL001933	E3 ubiquitin-protein ligase MARCH1/8 [EC:6.3.2.19]	-	-	-	--
Unigene30693_sinensis	1111	59	656	9.5332	127.0588	3.73639192515897	Up	1.649752e-153	3.92274990061433e-151	gi|405954257|gb|EKC21750.1|	79.3	3e-13	hypothetical protein CGI_10003383 [Crassostrea gigas]	--	--	--	--	--	--	--	--	--	--	--	--	--	--	--	--	--	--	-	-	-	--
Unigene15263_sinensis	576	52	574	16.2062	214.4393	3.72595157565339	Up	3.13034e-134	6.43326423185841e-132	--	--	--	--	--	--	--	--	--	--	--	--	--	--	--	--	--	--	--	--	--	--	-	-	-	--
Unigene27729_sinensis	1573	82	905	9.3581	123.8040	3.72569847198844	Up	1.316324e-210	4.38789362468899e-208	gi|241829140|ref|XP_002414741.1|	278.1	9e-73	transcription initiation factor IIF, small subunit, putative [Ixodes scapularis] >gi|215508953|gb|EEC18406.1| transcription initiation factor IIF, small subunit, putative [Ixodes scapularis]	gi|328709621|ref|XM_001951521.2|	67.9	1e-07	PREDICTED: Acyrthosiphon pisum general transcription factor IIF subunit 2-like (LOC100167421), mRNA	sp|P41900|T2FB_DROME	249	2e-65	General transcription factor IIF subunit 2 OS=Drosophila melanogaster GN=TfIIFbeta PE=2 SV=2	SPBC1198.13c	91.7	3e-18	COG5090	Transcription initiation factor IIF, small subunit (RAP30)	K03139	1e-73	278	isc:IscW_ISCW023150	transcription initiation factor TFIIF subunit beta [EC:3.6.4.12]	GO:0044238//primary metabolic process;GO:0034645//cellular macromolecule biosynthetic process;GO:0010467//gene expression	-	-	--
Unigene26225_sinensis	1214	3	33	0.4436	5.8494	3.72095737777298	Up	6.29156e-09	1.5369098654979e-07	gi|2981095|gb|AAC06232.1|	654.4	0.0	Cdc20 [Spisula solidissima]	gi|2981094|gb|AF052575.1|AF052575	99.6	3e-17	Spisula solidissima Cdc20 mRNA, complete cds	sp|Q9JJ66|CDC20_MOUSE	452	5e-127	Cell division cycle protein 20 homolog OS=Mus musculus GN=Cdc20 PE=1 SV=2	SPAC144.13c	286	4e-77	COG2319	FOG: WD40 repeat	K03363	3e-135	482	spu:576371	cell division cycle 20, cofactor of APC complex	GO:0090129//positive regulation of synapse maturation;GO:0031915//positive regulation of synaptic plasticity;GO:0008284//positive regulation of cell proliferation;GO:0051488//activation of anaphase-promoting complex activity;GO:0040020//regulation of meiosis;GO:0031145//anaphase-promoting complex-dependent proteasomal ubiquitin-dependent protein catabolic process;GO:0050773//regulation of dendrit…	GO:0008022//protein C-terminus binding;GO:0019899//enzyme binding	GO:0005813//centrosome;GO:0043234//protein complex;GO:0048471//perinuclear region of cytoplasm	--
Unigene23278_sinensis	458	2	22	0.7839	10.3365	3.72093432766642	Up	2.5794e-06	4.53455005299016e-05	--	--	--	--	--	--	--	--	--	--	--	--	--	--	--	--	--	--	--	--	--	--	-	-	-	--
Unigene35226_sinensis	327	4	44	2.1959	28.9548	3.72091827024482	Up	1.613564e-11	4.9962395696e-10	--	--	--	--	--	--	--	--	--	--	--	--	--	--	--	--	--	--	--	--	--	--	-	-	-	--
Unigene31391_sinensis	1381	27	297	3.5097	46.2783	3.72091624595194	Up	3.60806e-70	4.39457923321678e-68	gi|291228984|ref|XP_002734456.1|	164.9	9e-39	PREDICTED: hypothetical protein [Saccoglossus kowalevskii]	--	--	--	--	--	--	--	--	--	--	--	--	--	--	--	--	--	--	-	-	-	--
Unigene6464_sinensis	718	4	44	1.0001	13.1869	3.72088928571718	Up	1.613564e-11	4.99402000515327e-10	gi|443934758|gb|AGD81026.1|	59.3	1e-07	mucin 2 [Gallus gallus]	--	--	--	--	sp|Q02817|MUC2_HUMAN	56.2	6e-08	Mucin-2 OS=Homo sapiens GN=MUC2 PE=1 SV=2	--	--	--	--	--	K10955	5e-09	61.6	gga:423101	intestinal mucin-2	-	-	-	--
CL3960.Contig1_sinensis	1109	4	44	0.6475	8.5376	3.72087847372331	Up	1.613564e-11	4.99846110787016e-10	gi|390363834|ref|XP_790033.2|	44.7	3e-37	PREDICTED: uncharacterized protein LOC585101 [Strongylocentrotus purpuratus]	--	--	--	--	--	--	--	--	--	--	--	--	--	K05016	4e-25	89.0	spu:753989	chloride channel 7	-	-	-	--
CL239.Contig3_sinensis	4190	4	44	0.1714	2.2597	3.7206922371743	Up	1.613564e-11	5.00068462259786e-10	gi|405967711|gb|EKC32844.1|	195.3	2e-47	Adenylate cyclase type 10 [Crassostrea gigas]	--	--	--	--	sp|Q96PN6|ADCYA_HUMAN	79.3	7e-14	Adenylate cyclase type 10 OS=Homo sapiens GN=ADCY10 PE=1 SV=3	--	--	--	--	--	K11265	1e-22	110	spu:574069	adenylate cyclase 10 [EC:4.6.1.1]	-	-	GO:0044424//intracellular part	--
CL1239.Contig2_sinensis	2423	4	44	0.2964	3.9076	3.72066544117439	Up	1.613564e-11	5.0029101164219e-10	gi|405957164|gb|EKC23395.1|	339.7	4e-91	hypothetical protein CGI_10019612 [Crassostrea gigas]	--	--	--	--	--	--	--	--	--	--	--	--	--	--	--	--	--	--	-	-	-	--
Unigene534_sinensis	2502	43	469	3.0852	40.3367	3.70865713882749	Up	1.43052e-109	2.44271808529412e-107	gi|405961747|gb|EKC27498.1|	667.9	0.0	EF-hand domain-containing protein C3orf25-like protein [Crassostrea gigas]	--	--	--	--	sp|Q95LL8|EFC12_MACFA	98.6	6e-20	EF-hand calcium-binding domain-containing protein 12 OS=Macaca fascicularis GN=EFCAB12 PE=2 SV=1	--	--	--	--	--	K14570	2e-08	62.0	dmo:Dmoj_GI22024	RNA exonuclease 1 [EC:3.1.-.-]	-	-	-	--
CL3109.Contig2_sinensis	3606	12	130	0.5974	7.7577	3.69885984335795	Up	2.1246e-31	1.41644743923445e-29	gi|405970093|gb|EKC35028.1|	1671.0	0.0	Tetratricopeptide repeat protein 18 [Crassostrea gigas]	gi|390333525|ref|XM_003723685.1|	155	2e-33	PREDICTED: Strongylocentrotus purpuratus tetratricopeptide repeat domain 18, transcript variant 1 (ttc18), mRNA	sp|Q5T0N1|TTC18_HUMAN	936	0.0	Tetratricopeptide repeat protein 18 OS=Homo sapiens GN=TTC18 PE=2 SV=2	MTH1585	60.1	3e-08	COG0457	FOG: TPR repeat	K03350	3e-08	62.4	dmo:Dmoj_GI13353	anaphase-promoting complex subunit 3	-	-	-	--
CL804.Contig1_sinensis	1754	11	119	1.1258	14.5993	3.69687673870586	Up	7.55638e-29	4.71725303064516e-27	gi|405976302|gb|EKC40814.1|	543.1	1e-152	hypothetical protein CGI_10026497 [Crassostrea gigas]	--	--	--	--	sp|Q4V7A9|K895L_RAT	171	5e-42	Uncharacterized protein KIAA0895-like OS=Rattus norvegicus GN=Kiaa0895l PE=2 SV=1	--	--	--	--	--	--	--	--	--	--	-	-	-	--
Unigene30500_sinensis	1900	4	43	0.3779	4.8700	3.68784534859711	Up	3.26358e-11	9.8685049921875e-10	--	--	--	--	--	--	--	--	--	--	--	--	--	--	--	--	--	--	--	--	--	--	-	-	-	--
Unigene22000_sinensis	669	4	43	1.0733	13.8311	3.68779061206212	Up	3.26358e-11	9.87279005731654e-10	gi|74861506|sp|Q86KC7.1|Y4171_DICDI	62.0	2e-08	RecName: Full=Uncharacterized protein DDB_G0274171; Flags: Precursor	--	--	--	--	sp|Q86KC7|Y4171_DICDI	73.6	3e-13	Uncharacterized protein DDB_G0274171 OS=Dictyostelium discoideum GN=DDB_G0274171 PE=2 SV=1	--	--	--	--	--	K04657	9e-08	57.4	spu:580173	chordin	-	-	-	--
CL8869.Contig2_sinensis	4856	25	267	0.9242	11.8317	3.67830847786729	Up	1.18066e-62	1.28123678411215e-60	gi|405966381|gb|EKC31674.1|	2289.6	0.0	Dynein heavy chain 6, axonemal [Crassostrea gigas]	gi|433382|gb|U03977.1|TGDYH5A	192	1e-44	Tripneustes gratilla dynein heavy chain isotype 5A (DYH5A) mRNA, partial cds	sp|Q9C0G6|DYH6_HUMAN	1735	0.0	Dynein heavy chain 6, axonemal OS=Homo sapiens GN=DNAH6 PE=1 SV=3	YKR054c	203	2e-51	COG5245	Dynein, heavy chain	K10408	3e-157	557	xtr:100036734	dynein heavy chain, axonemal	-	-	-	--
CL3868.Contig1_sinensis	1229	6	64	0.8764	11.2058	3.67651235428001	Up	4.66832e-16	1.84061791782682e-14	--	--	--	--	--	--	--	--	--	--	--	--	--	--	--	--	--	--	--	--	--	--	-	-	-	--
CL8869.Contig1_sinensis	4793	28	297	1.0487	13.3341	3.66844651936752	Up	2.29714e-69	2.778462615625e-67	gi|405966381|gb|EKC31674.1|	2283.4	0.0	Dynein heavy chain 6, axonemal [Crassostrea gigas]	gi|433382|gb|U03977.1|TGDYH5A	192	1e-44	Tripneustes gratilla dynein heavy chain isotype 5A (DYH5A) mRNA, partial cds	sp|Q9C0G6|DYH6_HUMAN	1738	0.0	Dynein heavy chain 6, axonemal OS=Homo sapiens GN=DNAH6 PE=1 SV=3	YKR054c	203	2e-51	COG5245	Dynein, heavy chain	K10408	1e-156	555	acs:100555374	dynein heavy chain, axonemal	-	-	-	--
Unigene3617_sinensis	471	7	74	2.6680	33.8085	3.66355543718512	Up	2.56178e-18	1.11200405495327e-16	--	--	--	--	--	--	--	--	--	--	--	--	--	--	--	--	--	--	--	--	--	--	-	-	-	--
CL3182.Contig1_sinensis	1169	20	211	3.0713	38.8403	3.66063299947698	Up	1.21686e-49	1.13490521204819e-47	--	--	--	--	--	--	--	--	--	--	--	--	--	--	--	--	--	--	--	--	--	--	-	-	-	--
CL6398.Contig1_sinensis	1662	17	179	1.8362	23.1759	3.65783025312701	Up	2.59232e-42	2.1551830797136e-40	gi|291225187|ref|XP_002732582.1|	192.2	7e-47	PREDICTED: expressed hypothetical protein-like [Saccoglossus kowalevskii]	--	--	--	--	--	--	--	--	SMc00183	77.8	5e-14	COG0431	Predicted flavoprotein	--	--	--	--	--	-	-	-	--
Unigene10053_sinensis	989	2	21	0.3630	4.5692	3.65390013928782	Up	5.23334e-06	8.75183784109458e-05	gi|405959665|gb|EKC25677.1|	62.0	5e-08	Ankyrin repeat domain-containing protein 5 [Crassostrea gigas]	--	--	--	--	sp|Q9NU02|ANKR5_HUMAN	295	1e-79	Ankyrin repeat domain-containing protein 5 OS=Homo sapiens GN=ANKRD5 PE=2 SV=2	DRA0257	76.3	8e-14	COG0666	FOG: Ankyrin repeat	K10380	2e-19	97.1	dme:Dmel_CG1651	ankyrin	-	-	-	--
CL7655.Contig2_sinensis	481	2	21	0.7464	9.3948	3.65384155804079	Up	5.23334e-06	8.75393912268907e-05	--	--	--	--	--	--	--	--	--	--	--	--	--	--	--	--	--	--	--	--	--	--	-	-	-	--
Unigene24795_sinensis	521	2	21	0.6891	8.6735	3.65382901621609	Up	5.23334e-06	8.76024902594906e-05	--	--	--	--	--	--	--	--	--	--	--	--	--	--	--	--	--	--	--	--	--	--	-	-	-	--
CL8138.Contig2_sinensis	1230	2	21	0.2919	3.6739	3.65376624226903	Up	5.23334e-06	8.75814471438866e-05	gi|325297072|ref|NP_001191540.1|	444.5	5e-123	glutamate receptor subunit protein GluR2 precursor [Aplysia californica] >gi|31074379|gb|AAP41204.1| glutamate receptor subunit protein GluR2 [Aplysia californica]	gi|459409158|gb|GAGF01033114.1|	65.9	4e-07	TSA: Chrysopa pallens Unigene46386_dacaoling transcribed RNA sequence	sp|Q9Z2W8|GRIA4_MOUSE	427	2e-119	Glutamate receptor 4 OS=Mus musculus GN=Gria4 PE=1 SV=2	--	--	--	--	--	K05197	2e-119	429	xla:100294513	glutamate receptor 1	GO:0044699;GO:0006810//transport	GO:0004872//receptor activity;GO:0005230//extracellular ligand-gated ion channel activity	GO:0016020//membrane;GO:0045202//synapse;GO:0071944//cell periphery	--
Unigene28075_sinensis	1468	2	21	0.2446	3.0783	3.65363752938786	Up	5.23334e-06	8.75604141354467e-05	gi|405974597|gb|EKC39230.1|	440.3	1e-121	hypothetical protein CGI_10005570 [Crassostrea gigas]	--	--	--	--	sp|Q8CJ11|GPR64_RAT	286	8e-77	G-protein coupled receptor 64 OS=Rattus norvegicus GN=Gpr64 PE=2 SV=1	--	--	--	--	--	K08451	3e-76	286	rno:266735	G protein-coupled receptor 64	GO:0007166//cell surface receptor signaling pathway	GO:0004871//signal transducer activity	GO:0005886//plasma membrane;GO:0044425//membrane part	--
CL554.Contig1_sinensis	2900	34	356	2.1047	26.4160	3.64972551135696	Up	1.768676e-82	2.47931364676056e-80	gi|397482725|ref|XP_003846229.1|	62.4	1e-07	PREDICTED: LOW QUALITY PROTEIN: carcinoembryonic antigen-related cell adhesion molecule 5 [Pan paniscus]	--	--	--	--	sp|P06731|CEAM5_HUMAN	153	2e-36	Carcinoembryonic antigen-related cell adhesion molecule 5 OS=Homo sapiens GN=CEACAM5 PE=1 SV=3	--	--	--	--	--	K06499	3e-36	154	ptr:456062	carcinoembryonic antigen-related cell adhesion molecule	-	-	-	--
Unigene10645_sinensis	2923	73	763	4.4833	56.1708	3.64718740465917	Up	9.83398e-175	2.66585039929961e-172	gi|260827760|ref|XP_002608832.1|	164.9	2e-38	hypothetical protein BRAFLDRAFT_89700 [Branchiostoma floridae] >gi|229294185|gb|EEN64842.1| hypothetical protein BRAFLDRAFT_89700 [Branchiostoma floridae]	--	--	--	--	sp|Q69CM7|MYBPP_RAT	106	3e-22	MYCBP-associated protein OS=Rattus norvegicus GN=Mycbpap PE=2 SV=1	--	--	--	--	--	--	--	--	--	--	GO:0044699;GO:0032501//multicellular organismal process	-	-	--
CL3230.Contig3_sinensis	1398	5	52	0.6420	8.0041	3.64009398934651	Up	3.50132e-13	1.18529379533528e-11	gi|405964666|gb|EKC30123.1|	79.7	4e-13	hypothetical protein CGI_10012404 [Crassostrea gigas]	--	--	--	--	--	--	--	--	--	--	--	--	--	--	--	--	--	--	-	-	-	--
Unigene33056_sinensis	965	5	52	0.9301	11.5955	3.64003538398385	Up	3.50132e-13	1.18471813054881e-11	--	--	--	--	--	--	--	--	--	--	--	--	--	--	--	--	--	--	--	--	--	--	-	-	-	--
Unigene11503_sinensis	1252	8	83	1.1471	14.2656	3.63647735597517	Up	2.85286e-20	1.35300138420694e-18	gi|291227358|ref|XP_002733653.1|	317.0	1e-84	PREDICTED: hypothetical protein [Saccoglossus kowalevskii]	--	--	--	--	sp|P62972|UBIQP_XENLA	54.7	4e-07	Polyubiquitin (Fragment) OS=Xenopus laevis PE=1 SV=2	YLL039c	54.7	3e-07	COG5272	Ubiquitin	K02977	3e-07	57.0	isc:IscW_ISCW000125	small subunit ribosomal protein S27Ae	-	-	-	--
Unigene30592_sinensis	1050	3	31	0.5129	6.3531	3.63071125141045	Up	2.57334e-08	5.90715072355848e-07	gi|405950965|gb|EKC18917.1|	190.3	1e-46	Beta-1-syntrophin [Crassostrea gigas]	--	--	--	--	sp|Q2HJF3|ORC6_BOVIN	149	8e-36	Origin recognition complex subunit 6 OS=Bos taurus GN=ORC6 PE=2 SV=1	--	--	--	--	--	K02608	7e-39	161	bfo:BRAFLDRAFT_228799	origin recognition complex subunit 6	-	-	-	--
Unigene32679_sinensis	763	6	62	1.4117	17.4857	3.63067011264205	Up	1.893708e-15	7.25702654851485e-14	--	--	--	--	--	--	--	--	--	--	--	--	--	--	--	--	--	--	--	--	--	--	-	-	-	--
CL6.Contig2_sinensis	810	3	31	0.6649	8.2355	3.63064695982945	Up	2.57334e-08	5.90909770797627e-07	--	--	--	--	--	--	--	--	--	--	--	--	--	--	--	--	--	--	--	--	--	--	-	-	-	--
CL4773.Contig1_sinensis	1158	16	165	2.4804	30.6613	3.6277741670127	Up	7.37208e-39	5.66893423311258e-37	--	--	--	--	--	--	--	--	--	--	--	--	--	--	--	--	--	--	--	--	--	--	-	-	-	--
CL3139.Contig2_sinensis	941	17	175	3.2431	40.0187	3.62522888767166	Up	4.21836e-41	3.43729734315789e-39	gi|405950063|gb|EKC18070.1|	180.6	9e-44	hypothetical protein CGI_10015293 [Crassostrea gigas]	--	--	--	--	sp|Q6ZTI6|F101A_HUMAN	62.0	2e-09	Protein FAM101A OS=Homo sapiens GN=FAM101A PE=2 SV=3	--	--	--	--	--	--	--	--	--	--	-	-	-	--
CL5236.Contig3_sinensis	1103	14	144	2.2785	28.0932	3.62406469059148	Up	4.54548e-34	3.20201259979778e-32	--	--	--	--	--	--	--	--	--	--	--	--	--	--	--	--	--	--	--	--	--	--	-	-	-	--
Unigene9798_sinensis	2676	71	726	4.7629	58.3802	3.61556698939341	Up	3.9376e-165	1.00119946861314e-162	gi|405976913|gb|EKC41391.1|	533.9	1e-149	Leucine-, glutamate- and lysine-rich protein 1 [Crassostrea gigas]	--	--	--	--	sp|Q6ZMV7|LEKR1_HUMAN	189	4e-47	Leucine-, glutamate- and lysine-rich protein 1 OS=Homo sapiens GN=LEKR1 PE=2 SV=2	aq_1006	119	2e-26	COG0419	ATPase involved in DNA repair	K10421	3e-31	137	dse:Dsec_GM17234	CAP-Gly domain-containing linker protein 1	-	-	-	--
Unigene16701_sinensis	1511	102	1036	12.1182	147.5402	3.60586077006111	Up	2.4856e-234	9.21113119148936e-232	gi|443684330|gb|ELT88275.1|	140.2	2e-31	hypothetical protein CAPTEDRAFT_122410 [Capitella teleta]	--	--	--	--	--	--	--	--	--	--	--	--	--	--	--	--	--	--	-	-	-	--
CL2831.Contig4_sinensis	3202	13	132	0.7288	8.8709	3.60548561678653	Up	3.21798e-31	2.1392504639313e-29	gi|405973079|gb|EKC37811.1|	74.7	3e-11	hypothetical protein CGI_10017632 [Crassostrea gigas]	gi|350590805|ref|XM_003131924.3|	101	2e-17	PREDICTED: Sus scrofa proline-, glutamic acid- and leucine-rich protein 1-like (LOC100516108), mRNA	sp|Q5TCS8|AKD1_HUMAN	747	0.0	Adenylate kinase domain-containing protein 1 OS=Homo sapiens GN=AKD1 PE=2 SV=2	aq_2032	74.3	1e-12	COG0532	Translation initiation factor 2 (IF-2; GTPase)	K04574	6e-27	124	xtr:100101753	neurofilament heavy polypeptide	-	-	-	--
Unigene31869_sinensis	653	7	71	1.9244	23.3970	3.60384294740311	Up	2.08314e-17	8.74278799156627e-16	gi|226487416|emb|CAX74578.1|	77.4	5e-13	hypothetical protein [Schistosoma japonicum]	--	--	--	--	--	--	--	--	--	--	--	--	--	--	--	--	--	--	-	-	-	--
Unigene38359_sinensis	3521	49	494	2.4982	30.1909	3.59515287923036	Up	2.22998e-112	3.92324435909091e-110	gi|405970021|gb|EKC34959.1|	235.0	2e-59	Zinc finger CW-type PWWP domain protein 1-like protein [Crassostrea gigas]	gi|13446351|gb|AC005082.3|	63.9	5e-06	Homo sapiens BAC clone CTA-271G13 from 7, complete sequence	sp|Q6IR42|ZCPW1_MOUSE	162	6e-39	Zinc finger CW-type PWWP domain protein 1 OS=Mus musculus GN=Zcwpw1 PE=2 SV=2	--	--	--	--	--	K11424	3e-16	89.0	mgp:100543303	histone-lysine N-methyltransferase NSD2 [EC:2.1.1.43]	-	-	-	--
Unigene29656_sinensis	924	29	292	5.6341	68.0027	3.59333495316636	Up	4.56788e-67	5.32173297190635e-65	gi|405950168|gb|EKC18171.1|	256.9	1e-66	UPF0573 protein C2orf70-like protein A [Crassostrea gigas]	--	--	--	--	sp|Q5M7F8|C070A_XENLA	158	2e-38	UPF0573 protein C2orf70 homolog A OS=Xenopus laevis PE=2 SV=1	--	--	--	--	--	--	--	--	--	--	-	-	-	--
CL2107.Contig1_sinensis	1920	37	372	3.4594	41.6924	3.59119067953107	Up	5.87382e-85	8.36857189325153e-83	gi|347968463|ref|XP_312188.5|	56.2	7e-06	AGAP002737-PA [Anopheles gambiae str. PEST] >gi|333467991|gb|EAA07771.5| AGAP002737-PA [Anopheles gambiae str. PEST]	--	--	--	--	sp|Q54MT2|NOP56_DICDI	56.6	2e-07	Nucleolar protein 56 OS=Dictyostelium discoideum GN=nop56 PE=3 SV=1	--	--	--	--	--	K13172	2e-10	68.6	dse:Dsec_GM14188	serine/arginine repetitive matrix protein 2	-	-	-	--
Unigene25740_sinensis	974	117	1176	21.5640	259.8145	3.59078522867567	Up	8.54316e-265	3.58550249421687e-262	--	--	--	--	--	--	--	--	--	--	--	--	--	--	--	--	--	--	--	--	--	--	-	-	-	--
CL4898.Contig2_sinensis	1707	53	531	5.5737	66.9385	3.58612896484597	Up	2.06842e-120	3.8427934128e-118	gi|331029782|gb|AEC50045.1|	111.3	1e-22	theromacin [Hyriopsis cumingii]	--	--	--	--	sp|B3RFR8|HYDMA_HYDVU	95.5	3e-19	Hydramacin-1 OS=Hydra vulgaris PE=1 SV=1	--	--	--	--	--	--	--	--	--	--	-	-	-	--
CL8853.Contig2_sinensis	1451	63	631	7.7943	93.5787	3.58568882030764	Up	9.55426e-143	2.09979728687697e-140	gi|405976307|gb|EKC40819.1|	123.6	2e-26	hypothetical protein CGI_10026502 [Crassostrea gigas]	--	--	--	--	sp|Q68DN1|CB016_HUMAN	79.7	1e-14	Uncharacterized protein C2orf16 OS=Homo sapiens GN=C2orf16 PE=2 SV=3	PM0926	69.3	2e-11	COG4531	ABC-type Zn2+ transport system, periplasmic component/surface adhesin	K11308	1e-11	71.6	dpe:Dper_GL15211	histone acetyltransferase MYST1 [EC:2.3.1.48]	-	-	-	--
Unigene16916_sinensis	1684	2	20	0.2132	2.5557	3.58343915273331	Up	1.05823e-05	0.000169057156317358	--	--	--	--	--	--	--	--	--	--	--	--	--	--	--	--	--	--	--	--	--	--	-	-	-	--
Unigene37695_sinensis	259	2	20	1.3862	16.6167	3.5834265693002	Up	1.05823e-05	0.000168902235670103	--	--	--	--	--	--	--	--	--	--	--	--	--	--	--	--	--	--	--	--	--	--	-	-	-	--
CL9094.Contig1_sinensis	1533	2	20	0.2342	2.8074	3.58342165358025	Up	1.05823e-05	0.000168979660485904	gi|260819262|ref|XP_002604956.1|	416.8	1e-114	hypothetical protein BRAFLDRAFT_92596 [Branchiostoma floridae] >gi|229290285|gb|EEN60966.1| hypothetical protein BRAFLDRAFT_92596 [Branchiostoma floridae]	--	--	--	--	sp|Q6GMG6|S5A3B_DANRE	404	3e-112	Solute carrier family 52, riboflavin transporter, member 3-B OS=Danio rerio GN=slc52a3b PE=2 SV=1	--	--	--	--	--	K14620	2e-115	416	bfo:BRAFLDRAFT_92596	riboflavin transporter 2	-	-	GO:0016020//membrane	--
Unigene27493_sinensis	309	2	20	1.1619	13.9279	3.58341993751627	Up	1.05823e-05	0.000168940939207149	--	--	--	--	--	--	--	--	--	--	--	--	--	--	--	--	--	--	--	--	--	--	-	-	-	--
Unigene16785_sinensis	875	11	110	2.2568	27.0520	3.58338478272471	Up	4.0399e-26	2.34156233860233e-24	--	--	--	--	--	--	--	--	--	--	--	--	--	--	--	--	--	--	--	--	--	--	-	-	-	--
Unigene26768_sinensis	1373	2	20	0.2615	3.1345	3.58335247818878	Up	1.05823e-05	0.000169018399518569	gi|405959318|gb|EKC25370.1|	302.0	4e-80	hypothetical protein CGI_10022372 [Crassostrea gigas]	--	--	--	--	sp|E9Q555|RN213_MOUSE	159	1e-38	E3 ubiquitin-protein ligase RNF213 OS=Mus musculus GN=Rnf213 PE=2 SV=1	--	--	--	--	--	--	--	--	--	--	-	-	-	--
CL9588.Contig1_sinensis	460	3	30	1.1708	14.0339	3.5833494315167	Up	5.18558e-08	1.15092122656897e-06	--	--	--	--	--	--	--	--	--	--	--	--	--	--	--	--	--	--	--	--	--	--	-	-	-	--
Unigene28044_sinensis	1970	3	30	0.2734	3.2770	3.58329052482406	Up	5.18558e-08	1.15128799560229e-06	gi|405969876|gb|EKC34821.1|	164.1	2e-38	hypothetical protein CGI_10022523 [Crassostrea gigas]	--	--	--	--	sp|Q5VYJ5|CJ112_HUMAN	277	7e-74	MAM and LDL-receptor class A domain-containing protein C10orf112 OS=Homo sapiens GN=C10orf112 PE=2 SV=3	--	--	--	--	--	K05119	1e-26	122	aag:AaeL_AAEL003969	anaplastic lymphoma kinase [EC:2.7.10.1]	-	-	-	--
CL4693.Contig1_sinensis	1786	4	40	0.4021	4.8194	3.58322730543138	Up	2.67084e-10	7.47588396785858e-09	gi|154419561|ref|XP_001582797.1|	58.2	1e-06	viral A-type inclusion protein [Trichomonas vaginalis G3]	--	--	--	--	sp|Q8I659|YPF11_PLAF7	84.0	1e-15	Uncharacterized protein PFB0765w OS=Plasmodium falciparum (isolate 3D7) GN=PFB0765w PE=4 SV=1	FN0522	84.3	6e-16	COG0419	ATPase involved in DNA repair	K10352	2e-15	85.1	acs:100555799	myosin heavy chain	-	-	-	--
Unigene33428_sinensis	1783	63	629	6.3429	75.9127	3.58112676258801	Up	3.81996e-142	8.31664978875e-140	gi|260820768|ref|XP_002605706.1|	453.4	1e-125	hypothetical protein BRAFLDRAFT_279978 [Branchiostoma floridae] >gi|229291041|gb|EEN61716.1| hypothetical protein BRAFLDRAFT_279978 [Branchiostoma floridae]	--	--	--	--	sp|Q9UHP6|RTDR1_HUMAN	256	1e-67	Rhabdoid tumor deletion region protein 1 OS=Homo sapiens GN=RTDR1 PE=2 SV=1	--	--	--	--	--	K03456	8e-10	66.2	ssc:397470	protein phosphatase 2 (formerly 2A), regulatory subunit A	GO:0006810//transport;GO:0009987//cellular process	-	-	--
Unigene29644_sinensis	1091	126	1258	20.7323	248.1252	3.58111618498474	Up	1.797496e-282	8.07933863380645e-280	gi|405959116|gb|EKC25181.1|	149.4	2e-34	hypothetical protein CGI_10010525 [Crassostrea gigas]	--	--	--	--	--	--	--	--	--	--	--	--	--	--	--	--	--	--	-	-	-	--
Unigene33029_sinensis	1975	8	79	0.7272	8.6075	3.56517017115053	Up	4.62306e-19	2.08468587145631e-17	gi|405969685|gb|EKC34639.1|	151.4	1e-34	Ankycorbin [Crassostrea gigas]	--	--	--	--	sp|P53355|DAPK1_HUMAN	93.2	2e-18	Death-associated protein kinase 1 OS=Homo sapiens GN=DAPK1 PE=1 SV=6	FN0178	77.0	1e-13	COG0666	FOG: Ankyrin repeat	K08803	3e-18	94.4	mcc:694315	death-associated protein kinase [EC:2.7.11.1]	GO:0017148//negative regulation of translation;GO:0007243//intracellular protein kinase cascade;GO:0097190//apoptotic signaling pathway;GO:0006468//protein phosphorylation;GO:0006917//induction of apoptosis;GO:0071346//cellular response to interferon-gamma	GO:0004672//protein kinase activity;GO:0042802//identical protein binding;GO:0005516//calmodulin binding;GO:0005524//ATP binding	GO:0015629//actin cytoskeleton	--
Unigene5068_sinensis	1964	12	118	1.0968	12.9287	3.55920483596799	Up	9.13204e-28	5.53234865008696e-26	--	--	--	--	--	--	--	--	--	--	--	--	--	--	--	--	--	--	--	--	--	--	-	-	-	--
CL6567.Contig1_sinensis	8733	65	639	1.3361	15.7454	3.55883051347806	Up	1.32214e-143	2.92419592571428e-141	gi|405966381|gb|EKC31674.1|	4271.5	0.0	Dynein heavy chain 6, axonemal [Crassostrea gigas]	gi|326663947|ref|XM_001921217.3|	176	1e-39	PREDICTED: Danio rerio dynein, axonemal, heavy chain 6 (dnah6), mRNA	sp|Q9C0G6|DYH6_HUMAN	3760	0.0	Dynein heavy chain 6, axonemal OS=Homo sapiens GN=DNAH6 PE=1 SV=3	YKR054c	657	0.0	COG5245	Dynein, heavy chain	K10408	0.0	2259	dre:100317899	dynein heavy chain, axonemal	GO:0006200//ATP catabolic process;GO:0001539//ciliary or flagellar motility;GO:0007018//microtubule-based movement	GO:0003777//microtubule motor activity;GO:0005524//ATP binding;GO:0016887//ATPase activity	GO:0035085//cilium axoneme;GO:0005858//axonemal dynein complex;GO:0005874//microtubule	--
Unigene3749_sinensis	1325	4	39	0.5419	6.3338	3.5469727604147	Up	5.36114e-10	1.46300533748531e-08	gi|405976898|gb|EKC41376.1|	356.7	1e-96	Calcium-dependent protein kinase 5 [Crassostrea gigas]	--	--	--	--	sp|Q9QXZ0|MACF1_MOUSE	65.5	3e-10	Microtubule-actin cross-linking factor 1 OS=Mus musculus GN=Macf1 PE=1 SV=2	--	--	--	--	--	K10382	8e-09	62.4	ecb:100056885	dystonin	-	-	-	--
Unigene138_sinensis	2144	4	39	0.3349	3.9143	3.54695205015905	Up	5.36114e-10	1.46243250845732e-08	gi|405974833|gb|EKC39446.1|	67.8	2e-09	Fibropellin-1 [Crassostrea gigas]	--	--	--	--	sp|P07207|NOTCH_DROME	148	5e-35	Neurogenic locus Notch protein OS=Drosophila melanogaster GN=N PE=1 SV=3	--	--	--	--	--	K02599	6e-36	153	tad:TRIADDRAFT_57306	Notch	-	-	-	--
Unigene27692_sinensis	2608	65	633	4.4741	52.2289	3.54517891188225	Up	8.34954e-142	1.80653447906832e-139	gi|405968548|gb|EKC33612.1|	992.6	0.0	hypothetical protein CGI_10017764 [Crassostrea gigas]	--	--	--	--	sp|Q8C0R9|LRRD1_MOUSE	234	7e-61	Leucine-rich repeat and death domain-containing protein 1 OS=Mus musculus GN=Lrrd1 PE=2 SV=2	alr0124_1	184	7e-46	COG4886	Leucine-rich repeat (LRR) protein	K12796	2e-41	171	xtr:780049	erbb2-interacting protein	-	-	-	--
Unigene20222_sinensis	653	78	758	21.4429	249.7877	3.54213049940505	Up	2.48436e-169	6.55616957727273e-167	--	--	--	--	--	--	--	--	--	--	--	--	--	--	--	--	--	--	--	--	--	--	-	-	-	--
Unigene10502_sinensis	1493	7	68	0.8417	9.8009	3.54153621309694	Up	1.675982e-16	6.72991296587896e-15	gi|301776745|ref|XP_002923794.1|	157.5	1e-36	PREDICTED: transcription factor HES-1-like [Ailuropoda melanoleuca]	--	--	--	--	sp|P35428|HES1_MOUSE	153	8e-37	Transcription factor HES-1 OS=Mus musculus GN=Hes1 PE=1 SV=1	--	--	--	--	--	K06054	2e-37	157	aml:100481439	hairy and enhancer of split 1	GO:2000978//negative regulation of forebrain neuron differentiation;GO:0006461//protein complex assembly;GO:0007224//smoothened signaling pathway;GO:0035910//ascending aorta morphogenesis;GO:0048715//negative regulation of oligodendrocyte differentiation;GO:0035019//somatic stem cell maintenance;GO:0030901//midbrain development;GO:0030513//positive regulation of BMP signaling pathway;GO:0003266//…	GO:0042803//protein homodimerization activity;GO:0001078//RNA polymerase II core promoter proximal region sequence-specific DNA binding transcription factor activity involved in negative regulation of transcription;GO:0071820//N-box binding;GO:0043565//sequence-specific DNA binding;GO:0042826//histone deacetylase binding	GO:0005654//nucleoplasm;GO:0005737//cytoplasm	--
Unigene25386_sinensis	854	32	310	6.7266	78.1122	3.5375985187547	Up	3.5989e-70	4.39109919614711e-68	gi|405963174|gb|EKC28771.1|	345.9	1e-93	MORN repeat-containing protein 5 [Crassostrea gigas]	gi|390364892|ref|XM_786599.3|	147	1e-31	PREDICTED: Strongylocentrotus purpuratus MORN repeat-containing protein 5-like (LOC586835), mRNA	sp|Q28FE4|MORN5_XENTR	287	2e-77	MORN repeat-containing protein 5 OS=Xenopus tropicalis GN=morn5 PE=2 SV=1	slr1485	69.3	8e-12	COG4642	Uncharacterized protein conserved in bacteria	--	--	--	--	--	-	-	-	--
CL1898.Contig1_sinensis	2172	54	523	4.4631	51.8152	3.53725733787884	Up	3.07868e-117	5.585639503125e-115	gi|471229737|ref|XP_004035709.1|	78.2	2e-12	hypothetical protein IMG5_091710 [Ichthyophthirius multifiliis] >gi|340505966|gb|EGR32223.1| hypothetical protein IMG5_091710 [Ichthyophthirius multifiliis]	--	--	--	--	sp|Q54MB1|Y4579_DICDI	58.9	4e-08	Uncharacterized SDCCAG3 family protein OS=Dictyostelium discoideum GN=DDB_G0286065 PE=3 SV=1	--	--	--	--	--	K11853	2e-07	58.5	phu:Phum_PHUM227220	ubiquitin carboxyl-terminal hydrolase 34 [EC:3.1.2.15]	-	-	-	--
Unigene9380_sinensis	1309	3	29	0.4114	4.7673	3.53455871621476	Up	1.042232e-07	2.21849255142071e-06	gi|405964765|gb|EKC30214.1|	605.5	1e-171	Fatty acid synthase [Crassostrea gigas]	gi|449478613|ref|XM_004176967.1|	73.8	2e-09	PREDICTED: Taeniopygia guttata fatty acid synthase (FASN), mRNA	sp|P12276|FAS_CHICK	504	1e-142	Fatty acid synthase OS=Gallus gallus GN=FASN PE=1 SV=5	all1649	271	1e-72	COG3321	Polyketide synthase modules and related proteins	K00665	1e-149	530	phu:Phum_PHUM565830	fatty acid synthase, animal type [EC:2.3.1.85]	GO:0009058//biosynthetic process;GO:0055114//oxidation-reduction process	GO:0003960//NADPH:quinone reductase activity;GO:0016296//palmitoyl-[acyl-carrier-protein] hydrolase activity;GO:0004314//[acyl-carrier-protein] S-malonyltransferase activity;GO:0004319//enoyl-[acyl-carrier-protein] reductase (NADPH, B-specific) activity;GO:0004313//[acyl-carrier-protein] S-acetyltransferase activity;GO:0004320//oleoyl-[acyl-carrier-protein] hydrolase activity;GO:0004316//3-oxoacy…	-	--
CL3031.Contig3_sinensis	493	3	29	1.0924	12.6580	3.53447634852469	Up	1.042232e-07	2.21917057481663e-06	--	--	--	--	--	--	--	--	--	--	--	--	--	--	--	--	--	--	--	--	--	--	-	-	-	--
Unigene31905_sinensis	544	3	29	0.9900	11.4713	3.53445656049395	Up	1.042232e-07	2.21984901277897e-06	--	--	--	--	--	--	--	--	--	--	--	--	--	--	--	--	--	--	--	--	--	--	-	-	-	--
CL4993.Contig1_sinensis	3484	43	415	2.2156	25.6321	3.53218233261366	Up	2.91414e-93	4.33814571923077e-91	gi|405951331|gb|EKC19253.1|	88.6	2e-15	hypothetical protein CGI_10009106 [Crassostrea gigas]	--	--	--	--	--	--	--	--	MA2043	53.9	2e-06	COG3209	Rhs family protein	--	--	--	--	--	-	-	-	--
Unigene5221_sinensis	4170	19	182	0.8179	9.3918	3.52140531742409	Up	1.134518e-41	9.35393308189349e-40	--	--	--	--	--	--	--	--	--	--	--	--	--	--	--	--	--	--	--	--	--	--	-	-	-	--
Unigene27009_sinensis	630	11	105	3.1344	35.8644	3.51629128731284	Up	1.288786e-24	7.16587644325618e-23	gi|332021163|gb|EGI61548.1|	55.1	2e-06	Serine/arginine repetitive matrix protein 1 [Acromyrmex echinatior]	--	--	--	--	sp|Q17FR9|SRRT_AEDAE	49.3	6e-06	Serrate RNA effector molecule homolog OS=Aedes aegypti GN=Ars2 PE=3 SV=1	--	--	--	--	--	--	--	--	--	--	-	-	-	--
CL4887.Contig1_sinensis	2010	2	19	0.1786	2.0341	3.50958662083984	Up	2.13204e-05	0.0003213002266061	gi|405971107|gb|EKC35962.1|	712.2	0.0	Putative tubulin polyglutamylase TTLL9 [Crassostrea gigas]	gi|291226068|ref|XM_002732972.1|	79.8	5e-11	PREDICTED: Saccoglossus kowalevskii Wu:fb75c08 protein-like (LOC100378711), mRNA	sp|Q3SZH6|TTLL9_BOVIN	547	3e-155	Probable tubulin polyglutamylase TTLL9 OS=Bos taurus GN=TTLL9 PE=2 SV=1	--	--	--	--	--	K00273	4e-39	163	ame:551507	D-amino-acid oxidase [EC:1.4.3.3]	-	-	-	--
Unigene27876_sinensis	950	2	19	0.3779	4.3037	3.50950109108065	Up	2.13204e-05	0.000321508863116883	--	--	--	--	--	--	--	--	--	--	--	--	--	--	--	--	--	--	--	--	--	--	-	-	-	--
CL2416.Contig1_sinensis	1290	2	19	0.2783	3.1694	3.5094969354297	Up	2.13204e-05	0.000321091860700389	gi|48526360|gb|AAT45385.1|	184.5	1e-44	sperm nuclear basic protein PL-I isoform PLIb [Spisula solidissima]	gi|786116|gb|L41834.1|ENXNUPR	65.9	5e-07	Ensis minor (clone 1/6) nuclear protein mRNA, complete cds	sp|Q8VE97|SRSF4_MOUSE	152	2e-36	Serine/arginine-rich splicing factor 4 OS=Mus musculus GN=Srsf4 PE=2 SV=1	SPAC140.02	70.5	6e-12	COG0724	RNA-binding proteins (RRM domain)	K12893	7e-39	162	mdo:100015407	splicing factor, arginine/serine-rich 4/5/6	-	-	-	--
Unigene24707_sinensis	888	2	19	0.4043	4.6042	3.5094523947612	Up	2.13204e-05	0.000321230741262976	gi|405953054|gb|EKC20786.1|	100.9	8e-20	Transcription factor Sox-14 [Crassostrea gigas]	--	--	--	--	sp|Q5RCU4|SOX6_PONAB	52.8	1e-06	Transcription factor SOX-6 OS=Pongo abelii GN=SOX6 PE=2 SV=1	--	--	--	--	--	K09269	1e-07	57.8	cfa:476871	transcription factor SOX5/6/13 (SOX group D)	-	-	-	--
CL7283.Contig2_sinensis	471	4	38	1.5245	17.3611	3.50945030443435	Up	1.073856e-09	2.84682167671233e-08	--	--	--	--	--	--	--	--	--	--	--	--	--	--	--	--	--	--	--	--	--	--	-	-	-	--
Unigene27253_sinensis	766	2	19	0.4687	5.3375	3.50942746480355	Up	2.13204e-05	0.000320814459524838	gi|443733464|gb|ELU17819.1|	105.5	2e-21	hypothetical protein CAPTEDRAFT_194956 [Capitella teleta]	--	--	--	--	sp|Q7Z4M0|R114L_HUMAN	101	2e-21	Meiotic recombination protein REC114-like OS=Homo sapiens GN=C15orf60 PE=2 SV=2	--	--	--	--	--	--	--	--	--	--	-	-	-	--
Unigene26136_sinensis	539	2	19	0.6661	7.5854	3.50941457292005	Up	2.13204e-05	0.000320883764873623	--	--	--	--	--	--	--	--	--	--	--	--	--	--	--	--	--	--	--	--	--	--	-	-	-	--
Unigene28990_sinensis	955	4	38	0.7519	8.5624	3.50940252735517	Up	1.073856e-09	2.84790535454891e-08	gi|405953383|gb|EKC21057.1|	272.7	1e-71	ADP-ribosylation factor-like protein 6 [Crassostrea gigas]	gi|296317330|ref|NM_001184821.1|	65.9	3e-07	Saccoglossus kowalevskii ADP-ribosylation factor-like protein 6 (Arl6), mRNA	sp|Q5M9P8|ARL6_DANRE	252	7e-67	ADP-ribosylation factor-like protein 6 OS=Danio rerio GN=arl6 PE=2 SV=1	YDL192w	157	2e-38	COG1100	GTPase SAR1 and related small G proteins	K07951	1e-70	266	bfo:BRAFLDRAFT_59902	ADP-ribosylation factor-like 6	GO:0007265//Ras protein signal transduction;GO:0032402//melanosome transport;GO:0016055//Wnt receptor signaling pathway;GO:0070121//Kupffer's vesicle development;GO:0033339//pectoral fin development;GO:0007601//visual perception;GO:0042384//cilium assembly;GO:0007368//determination of left/right symmetry;GO:0006471//protein ADP-ribosylation	GO:0005515//protein binding;GO:0005525//GTP binding;GO:0046872//metal ion binding	GO:0035085//cilium axoneme;GO:0060170//cilium membrane;GO:0005932//microtubule basal body	--
Unigene5580_sinensis	665	2	19	0.5399	6.1482	3.50939997453991	Up	2.13204e-05	0.000321439287513525	--	--	--	--	--	--	--	--	--	--	--	--	--	--	--	--	--	--	--	--	--	--	-	-	-	--
CL3248.Contig4_sinensis	2040	4	38	0.3520	4.0084	3.50937914891469	Up	1.073856e-09	2.84898985773039e-08	gi|405972517|gb|EKC37281.1|	753.4	0.0	Coiled-coil domain-containing protein 37 [Crassostrea gigas]	gi|390367859|ref|XM_781866.3|	77.8	2e-10	PREDICTED: Strongylocentrotus purpuratus coiled-coil domain-containing protein 37-like (LOC581889), mRNA	sp|Q494V2|CCD37_HUMAN	457	3e-128	Coiled-coil domain-containing protein 37 OS=Homo sapiens GN=CCDC37 PE=2 SV=1	MK0690	81.3	6e-15	COG0419	ATPase involved in DNA repair	K10388	7e-18	93.2	dre:567639	plectin	-	-	-	--
Unigene2201_sinensis	1629	2	19	0.2204	2.5098	3.50937627479403	Up	2.13204e-05	0.000321161285967568	gi|405958470|gb|EKC24597.1|	88.6	2e-43	Papilin [Crassostrea gigas]	--	--	--	--	sp|Q9EPX2|PPN_MOUSE	65.9	2e-21	Papilin OS=Mus musculus GN=Papln PE=2 SV=2	--	--	--	--	--	K08624	9e-23	75.1	spu:586332	a disintegrin and metalloproteinase with thrombospondin motifs 9 [EC:3.4.24.-]	-	-	-	--
Unigene19561_sinensis	732	2	19	0.4905	5.5854	3.50933556186443	Up	2.13204e-05	0.000321022465441971	--	--	--	--	--	--	--	--	--	--	--	--	--	--	--	--	--	--	--	--	--	--	-	-	-	--
Unigene7831_sinensis	939	2	19	0.3824	4.3541	3.50922011364865	Up	2.13204e-05	0.000321369742016443	gi|328723151|ref|XP_003247772.1|	112.8	2e-23	PREDICTED: hypothetical protein LOC100574630 [Acyrthosiphon pisum]	--	--	--	--	--	--	--	--	--	--	--	--	--	--	--	--	--	--	-	-	-	--
Unigene25765_sinensis	998	2	19	0.3598	4.0967	3.50919515689868	Up	2.13204e-05	0.000320953100172861	gi|410949698|ref|XP_003981555.1|	90.5	1e-16	PREDICTED: coiled-coil domain-containing protein 152 [Felis catus]	--	--	--	--	sp|Q4G0S7|CC152_HUMAN	87.0	6e-17	Coiled-coil domain-containing protein 152 OS=Homo sapiens GN=CCDC152 PE=2 SV=3	PAB2181	67.8	3e-11	COG1318	Predicted transcriptional regulators	K10362	9e-12	71.6	nvi:100121154	myosin XVIII	-	-	-	--
CL9294.Contig2_sinensis	1729	46	435	4.7760	54.1389	3.50279083330211	Up	5.66408e-97	8.69186761057269e-95	gi|449275689|gb|EMC84458.1|	71.2	1e-10	hypothetical protein A306_07262, partial [Columba livia]	--	--	--	--	--	--	--	--	--	--	--	--	--	K13172	2e-07	58.5	dya:Dyak_GE20934	serine/arginine repetitive matrix protein 2	-	-	-	--
Unigene30710_sinensis	2125	98	926	8.2788	93.7707	3.5016436309517	Up	2.13232e-204	6.84592636313364e-202	gi|260802975|ref|XP_002596367.1|	540.0	1e-151	hypothetical protein BRAFLDRAFT_76176 [Branchiostoma floridae] >gi|229281622|gb|EEN52379.1| hypothetical protein BRAFLDRAFT_76176 [Branchiostoma floridae]	--	--	--	--	sp|Q8NE28|SGK71_HUMAN	245	3e-64	Probable inactive protein kinase-like protein SgK071 OS=Homo sapiens GN=SGK071 PE=2 SV=4	YAR019c	99.4	2e-20	COG0515	Serine/threonine protein kinase	K08857	6e-33	143	rno:290705	NIMA (never in mitosis gene a)-related kinase [EC:2.7.11.1]	-	GO:0016772//transferase activity, transferring phosphorus-containing groups	-	--
Unigene2388_sinensis	1049	9	85	1.5402	17.4365	3.50092087251016	Up	4.0955e-20	1.92920479716024e-18	gi|405975104|gb|EKC39696.1|	312.0	3e-83	Uncharacterized protein C15orf33 [Crassostrea gigas]	--	--	--	--	sp|Q96M60|F227B_HUMAN	134	3e-31	Protein FAM227B OS=Homo sapiens GN=FAM227B PE=2 SV=2	--	--	--	--	--	--	--	--	--	--	-	-	-	--
Unigene8430_sinensis	2373	7	66	0.5295	5.9850	3.49864865783853	Up	6.68676e-16	2.61719035078652e-14	gi|390337892|ref|XP_780878.3|	1036.2	0.0	PREDICTED: mutS protein homolog 4 [Strongylocentrotus purpuratus]	gi|354468087|ref|XM_003496451.1|	67.9	2e-07	PREDICTED: Cricetulus griseus mutS protein homolog 4-like (LOC100762582), mRNA	sp|O15457|MSH4_HUMAN	957	0.0	MutS protein homolog 4 OS=Homo sapiens GN=MSH4 PE=1 SV=2	YFL003c	349	1e-95	COG0249	Mismatch repair ATPase (MutS family)	K08740	0.0	1008	nve:NEMVE_v1g214346	DNA mismatch repair protein MSH4	GO:0001541//ovarian follicle development;GO:0007131//reciprocal meiotic recombination;GO:0000710//meiotic mismatch repair;GO:0007283//spermatogenesis;GO:0051026//chiasma assembly;GO:0007292//female gamete generation;GO:0045143//homologous chromosome segregation	GO:0008094//DNA-dependent ATPase activity;GO:0003684//damaged DNA binding;GO:0030983//mismatched DNA binding;GO:0005524//ATP binding	GO:0000795//synaptonemal complex;GO:0032300//mismatch repair complex	--
CL1283.Contig1_sinensis	5387	7	66	0.2333	2.6364	3.49831106316023	Up	6.68676e-16	2.61572084469399e-14	gi|405970416|gb|EKC35324.1|	58.9	3e-06	Titin [Crassostrea gigas]	--	--	--	--	sp|O01761|UNC89_CAEEL	231	1e-59	Muscle M-line assembly protein unc-89 OS=Caenorhabditis elegans GN=unc-89 PE=1 SV=3	SPAC140.02	60.1	4e-08	COG0724	RNA-binding proteins (RRM domain)	K12567	9e-45	184	gga:424126	titin [EC:2.7.11.1]	GO:0009653//anatomical structure morphogenesis;GO:0006996//organelle organization;GO:0061061//muscle structure development	GO:0005488//binding	GO:0044422;GO:0043232	--
Unigene29816_sinensis	1311	51	480	6.9834	78.7868	3.49595242382761	Up	1.196036e-106	2.00304404048077e-104	gi|405963972|gb|EKC29503.1|	154.5	1e-35	hypothetical protein CGI_10025512 [Crassostrea gigas]	--	--	--	--	--	--	--	--	--	--	--	--	--	--	--	--	--	--	-	-	-	--
Unigene25148_sinensis	1244	166	1560	23.9546	269.8480	3.49377236640513	Up	0	0	--	--	--	--	--	--	--	--	--	--	--	--	--	--	--	--	--	--	--	--	--	--	-	-	-	--
CL3139.Contig1_sinensis	1247	21	197	3.0231	33.9950	3.49122196248595	Up	1.174974e-44	1.01815004485075e-42	gi|405950063|gb|EKC18070.1|	180.6	1e-43	hypothetical protein CGI_10015293 [Crassostrea gigas]	--	--	--	--	sp|Q6ZTI6|F101A_HUMAN	62.0	3e-09	Protein FAM101A OS=Homo sapiens GN=FAM101A PE=2 SV=3	--	--	--	--	--	--	--	--	--	--	-	-	-	--
Unigene9837_sinensis	1204	92	862	13.7171	154.0621	3.48946458418447	Up	8.1479e-190	2.44679329784483e-187	gi|405977714|gb|EKC42150.1|	199.9	2e-49	Serine/threonine-protein kinase Nek6 [Crassostrea gigas]	--	--	--	--	sp|Q86I06|NEK3_DICDI	56.6	1e-07	Probable serine/threonine-protein kinase nek3 OS=Dictyostelium discoideum GN=nek3 PE=3 SV=1	--	--	--	--	--	K08857	5e-09	62.8	xtr:779890	NIMA (never in mitosis gene a)-related kinase [EC:2.7.11.1]	-	GO:0016740//transferase activity	-	--
Unigene10811_sinensis	2597	6	56	0.4147	4.6401	3.48401594522683	Up	1.223034e-13	4.24340417061753e-12	gi|405960243|gb|EKC26184.1|	58.2	2e-06	Fibroblast growth factor receptor 3 [Crassostrea gigas]	--	--	--	--	sp|P21803|FGFR2_MOUSE	331	4e-90	Fibroblast growth factor receptor 2 OS=Mus musculus GN=Fgfr2 PE=1 SV=4	YAR019c	83.2	2e-15	COG0515	Serine/threonine protein kinase	K04362	4e-97	357	api:100161175	fibroblast growth factor receptor 1 [EC:2.7.10.1]	GO:0046777//protein autophosphorylation;GO:0060442//branching involved in prostate gland morphogenesis;GO:0060348//bone development;GO:0001503//ossification;GO:0060485//mesenchyme development;GO:0048701//embryonic cranial skeleton morphogenesis;GO:0060425//lung morphogenesis;GO:0007423//sensory organ development;GO:0045595//regulation of cell differentiation;GO:0008284//positive regulation of cel…	GO:0017134//fibroblast growth factor binding;GO:0042803//protein homodimerization activity;GO:0005007//fibroblast growth factor-activated receptor activity	GO:0005938//cell cortex;GO:0009986//cell surface;GO:0005634//nucleus;GO:0031012//extracellular matrix;GO:0005887//integral to plasma membrane	--
CL4676.Contig1_sinensis	501	3	28	1.0749	12.0264	3.48393049421884	Up	2.08896e-07	4.27166874787203e-06	--	--	--	--	--	--	--	--	--	--	--	--	--	--	--	--	--	--	--	--	--	--	-	-	-	--
Unigene31830_sinensis	1104	18	168	2.9269	32.7458	3.48386451659413	Up	3.1067e-38	2.355176085963e-36	gi|405966305|gb|EKC31605.1|	73.6	2e-11	hypothetical protein CGI_10009850 [Crassostrea gigas]	--	--	--	--	--	--	--	--	--	--	--	--	--	--	--	--	--	--	-	-	-	--
Unigene27653_sinensis	1746	59	550	6.0661	67.7850	3.48212487155035	Up	1.573092e-121	2.94612221903226e-119	gi|405950012|gb|EKC18021.1|	189.1	6e-46	F-box only protein 39 [Crassostrea gigas]	--	--	--	--	sp|Q8N4B4|FBX39_HUMAN	120	7e-27	F-box only protein 39 OS=Homo sapiens GN=FBXO39 PE=2 SV=1	--	--	--	--	--	K10314	5e-27	123	mcc:713494	F-box protein 39	-	-	-	--
Unigene31502_sinensis	549	11	102	3.5968	39.9800	3.47449262629843	Up	1.018644e-23	5.50138828186047e-22	--	--	--	--	--	--	--	--	--	--	--	--	--	--	--	--	--	--	--	--	--	--	-	-	-	--
Unigene33451_sinensis	4223	39	361	1.6578	18.3951	3.47197964605786	Up	3.85354e-80	5.28488736732283e-78	gi|405972864|gb|EKC37611.1|	1072.8	0.0	Usherin [Crassostrea gigas]	--	--	--	--	sp|O75445|USH2A_HUMAN	108	8e-23	Usherin OS=Homo sapiens GN=USH2A PE=1 SV=3	--	--	--	--	--	K06777	1e-18	97.1	nve:NEMVE_v1g88020	protein tyrosine phosphatase, receptor type, D [EC:3.1.3.48]	-	-	-	--
CL2521.Contig4_sinensis	2132	9	83	0.7578	8.3773	3.4665962939217	Up	1.624242e-19	7.46926177544554e-18	gi|156387538|ref|XP_001634260.1|	72.8	8e-11	predicted protein [Nematostella vectensis] >gi|156221341|gb|EDO42197.1| predicted protein [Nematostella vectensis]	--	--	--	--	sp|Q498L2|SLTM_XENLA	68.2	7e-11	SAFB-like transcription modulator OS=Xenopus laevis GN=sltm PE=2 SV=1	--	--	--	--	--	K14972	6e-10	67.0	aga:AgaP_AGAP004734	PAX-interacting protein 1	-	-	-	--
Unigene3499_sinensis	1635	326	3002	35.7933	395.1008	3.46445930173945	Up	0	0	gi|405951686|gb|EKC19579.1|	94.0	2e-17	hypothetical protein CGI_10008180 [Crassostrea gigas]	--	--	--	--	sp|Q4V328|GRAP1_HUMAN	55.5	3e-07	GRIP1-associated protein 1 OS=Homo sapiens GN=GRIPAP1 PE=1 SV=1	MK0690	55.5	3e-07	COG0419	ATPase involved in DNA repair	K10352	4e-09	63.9	cin:100176948	myosin heavy chain	-	-	-	--
Unigene6594_sinensis	459	5	46	1.9555	21.5655	3.46311572442094	Up	2.26648e-11	6.93775901230228e-10	--	--	--	--	--	--	--	--	--	--	--	--	--	--	--	--	--	--	--	--	--	--	-	-	-	--
Unigene24310_sinensis	608	55	506	16.2391	179.0861	3.46310978191305	Up	2.08154e-111	3.6345566481203e-109	gi|260831210|ref|XP_002610552.1|	86.3	1e-15	hypothetical protein BRAFLDRAFT_65717 [Branchiostoma floridae] >gi|229295919|gb|EEN66562.1| hypothetical protein BRAFLDRAFT_65717 [Branchiostoma floridae]	--	--	--	--	sp|Q9DA42|CT085_MOUSE	60.1	3e-09	Uncharacterized protein C20orf85 homolog OS=Mus musculus PE=2 SV=2	--	--	--	--	--	--	--	--	--	--	-	-	-	--
Unigene34011_sinensis	1226	12	110	1.7571	19.3071	3.45786327687423	Up	2.27582e-25	1.29431921289796e-23	gi|405966498|gb|EKC31776.1|	493.4	9e-138	Cathepsin L [Crassostrea gigas]	gi|226476123|emb|FN316421.1|	67.9	1e-07	Schistosoma japonicum isolate Anhui full length mRNA clone SJFCA3887.013|FSA001-P00005-G06, complete sequence	sp|Q26636|CATL_SARPE	392	6e-109	Cathepsin L OS=Sarcophaga peregrina PE=1 SV=1	AF1946_2	72.8	1e-12	COG4870	Cysteine protease	K01365	5e-116	418	xtr:448179	cathepsin L [EC:3.4.22.15]	-	GO:0008233//peptidase activity	-	--
CL6347.Contig1_sinensis	3468	6	55	0.3106	3.4127	3.45778386227249	Up	2.43688e-13	8.31008285462555e-12	gi|290965454|dbj|BAI82253.1|	60.5	7e-07	merozoite surface protein 1 [Plasmodium fieldi]	--	--	--	--	--	--	--	--	--	--	--	--	--	--	--	--	--	--	-	-	-	--
CL3230.Contig2_sinensis	1463	15	137	1.8406	20.1508	3.45258907708742	Up	3.28624e-31	2.1825458013346e-29	gi|405964666|gb|EKC30123.1|	115.5	7e-24	hypothetical protein CGI_10012404 [Crassostrea gigas]	--	--	--	--	--	--	--	--	--	--	--	--	--	--	--	--	--	--	-	-	-	--
Unigene30278_sinensis	1934	48	436	4.4554	48.5115	3.44469992312611	Up	8.84064e-96	1.34187047529412e-93	gi|405973830|gb|EKC38521.1|	386.7	2e-105	Enkurin [Crassostrea gigas]	gi|198418374|ref|XM_002129081.1|	67.9	2e-07	PREDICTED: Ciona intestinalis enkurin-like (LOC100180681), mRNA	sp|Q8TC29|ENKUR_HUMAN	275	3e-73	Enkurin OS=Homo sapiens GN=ENKUR PE=2 SV=1	--	--	--	--	--	K15759	3e-09	64.3	api:100160824	inositol monophosphatase 3 [EC:3.1.3.25 3.1.3.7]	-	-	-	--
Unigene19776_sinensis	662	38	345	10.3045	112.1440	3.44400602596419	Up	4.02762e-76	5.26454517410882e-74	gi|260828619|ref|XP_002609260.1|	73.9	6e-12	hypothetical protein BRAFLDRAFT_86830 [Branchiostoma floridae] >gi|229294616|gb|EEN65270.1| hypothetical protein BRAFLDRAFT_86830 [Branchiostoma floridae]	--	--	--	--	--	--	--	--	--	--	--	--	--	--	--	--	--	--	-	-	-	--
Unigene29742_sinensis	1180	93	844	14.1482	153.9130	3.4434246681457	Up	1.028766e-183	2.93742206778688e-181	gi|405956924|gb|EKC23166.1|	222.6	3e-56	hypothetical protein CGI_10017327 [Crassostrea gigas]	--	--	--	--	sp|Q20681|BAT38_CAEEL	70.5	7e-12	BTB and MATH domain-containing protein 38 OS=Caenorhabditis elegans GN=bath-38 PE=4 SV=1	--	--	--	--	--	K10454	3e-10	67.0	dvi:Dvir_GJ21999	kelch-like protein 17 (actinfilin)	-	-	-	--
Unigene37150_sinensis	3527	298	2701	15.1674	164.7912	3.44159349865067	Up	0	0	gi|301767098|ref|XP_002918969.1|	83.2	1e-13	PREDICTED: zinc finger protein 451-like [Ailuropoda melanoleuca]	--	--	--	--	sp|Q9Y4E5|ZN451_HUMAN	139	4e-32	Zinc finger protein 451 OS=Homo sapiens GN=ZNF451 PE=1 SV=2	--	--	--	--	--	--	--	--	--	--	-	-	-	--
Unigene31550_sinensis	1622	80	725	8.8540	96.1838	3.44139264634329	Up	5.5371e-158	1.34882594370629e-155	gi|395742562|ref|XP_003777772.1|	59.3	7e-07	PREDICTED: uncharacterized protein LOC100939189, partial [Pongo abelii]	--	--	--	--	sp|Q6ZRP5|YD019_HUMAN	54.3	8e-07	Putative uncharacterized protein FLJ46204 OS=Homo sapiens PE=5 SV=2	--	--	--	--	--	--	--	--	--	--	-	-	-	--
CL8853.Contig1_sinensis	1499	136	1231	16.2869	176.7142	3.43963403654064	Up	7.7883e-267	3.28850347090909e-264	gi|405976307|gb|EKC40819.1|	123.6	2e-26	hypothetical protein CGI_10026502 [Crassostrea gigas]	--	--	--	--	sp|F1QBY1|NIPLB_DANRE	92.8	2e-18	Nipped-B-like protein B OS=Danio rerio GN=nipblb PE=2 SV=1	PM0926	64.7	4e-10	COG4531	ABC-type Zn2+ transport system, periplasmic component/surface adhesin	K03983	3e-14	80.5	xla:447645	alpha-2-antiplasmin	-	-	-	--
Unigene35108_sinensis	5520	203	1836	6.6017	71.5729	3.43850395114075	Up	0	0	gi|405978354|gb|EKC42754.1|	106.7	1e-20	hypothetical protein CGI_10021367 [Crassostrea gigas]	--	--	--	--	sp|Q869E1|DNLI1_DICDI	70.9	3e-11	DNA ligase 1 OS=Dictyostelium discoideum GN=lig1 PE=3 SV=1	--	--	--	--	--	K00907	3e-09	66.2	dan:Dana_GF13333	myosin-light-chain kinase [EC:2.7.11.18]	-	-	-	--
Unigene33233_sinensis	810	2	18	0.4432	4.7819	3.43155417395286	Up	4.2784e-05	0.000606453407121058	gi|291231519|ref|XP_002735708.1|	365.5	1e-99	PREDICTED: MutL protein homolog 1-like [Saccoglossus kowalevskii]	gi|291231518|ref|XM_002735662.1|	113	1e-21	PREDICTED: Saccoglossus kowalevskii MutL protein homolog 1-like (LOC100377875), mRNA	sp|P40692|MLH1_HUMAN	343	2e-94	DNA mismatch repair protein Mlh1 OS=Homo sapiens GN=MLH1 PE=1 SV=1	YMR167w	247	1e-65	COG0323	DNA mismatch repair enzyme (predicted ATPase)	K08734	6e-98	357	xla:100036779	DNA mismatch repair protein MLH1	GO:0000289//nuclear-transcribed mRNA poly(A) tail shortening;GO:0051257//spindle midzone assembly involved in meiosis;GO:0006298//mismatch repair;GO:0000712//resolution of meiotic recombination intermediates;GO:0016446//somatic hypermutation of immunoglobulin genes;GO:0006200//ATP catabolic process;GO:0007283//spermatogenesis;GO:0007141//male meiosis I;GO:0043060//meiotic metaphase I plate congre…	GO:0032407//MutSalpha complex binding;GO:0003697//single-stranded DNA binding;GO:0032137//guanine/thymine mispair binding;GO:0005524//ATP binding;GO:0016887//ATPase activity	GO:0005712//chiasma;GO:0032389//MutLalpha complex;GO:0001673//male germ cell nucleus;GO:0000795//synaptonemal complex;GO:0032390//MutLbeta complex	--
Unigene2137_sinensis	3013	8	72	0.4766	5.1422	3.43153486659899	Up	5.79458e-17	2.38032189870283e-15	gi|405952087|gb|EKC19937.1|	65.5	2e-08	Poly [ADP-ribose] polymerase 14 [Crassostrea gigas]	--	--	--	--	sp|Q2EMV9|PAR14_MOUSE	84.0	2e-15	Poly [ADP-ribose] polymerase 14 OS=Mus musculus GN=Parp14 PE=1 SV=3	TVN0719	61.6	8e-09	COG2110	Predicted phosphatase homologous to the C-terminal domain of histone macroH2A1	K15261	5e-18	94.4	mgp:100550444	poly [ADP-ribose] polymerase 10/14/15 [EC:2.4.2.30]	-	-	-	--
Unigene23774_sinensis	718	2	18	0.5000	5.3946	3.43151599040644	Up	4.2784e-05	0.00060719464167855	gi|466082202|ref|XP_004284696.1|	188.3	2e-46	PREDICTED: phosphomevalonate kinase [Orcinus orca]	--	--	--	--	sp|Q2KIU2|PMVK_BOVIN	186	4e-47	Phosphomevalonate kinase OS=Bos taurus GN=PMVK PE=2 SV=3	--	--	--	--	--	K13273	1e-46	186	bta:513533	phosphomevalonate kinase [EC:2.7.4.2]	GO:0070723//response to cholesterol;GO:0006695//cholesterol biosynthetic process	GO:0005524//ATP binding;GO:0004631//phosphomevalonate kinase activity	GO:0005829//cytosol;GO:0005777//peroxisome	--
Unigene10338_sinensis	530	3	27	1.0161	10.9623	3.43143622410334	Up	4.17466e-07	8.21826469454648e-06	--	--	--	--	--	--	--	--	--	--	--	--	--	--	--	--	--	--	--	--	--	--	-	-	-	--
Unigene29678_sinensis	478	2	18	0.7511	8.1033	3.43143264968155	Up	4.2784e-05	0.000605960255336451	gi|270006322|gb|EFA02770.1|	37.4	1e-12	hypothetical protein TcasGA2_TC008503 [Tribolium castaneum]	--	--	--	--	--	--	--	--	--	--	--	--	--	--	--	--	--	--	-	-	-	--
CL9370.Contig1_sinensis	925	3	27	0.5822	6.2811	3.43143049377535	Up	4.17466e-07	8.22058755059356e-06	--	--	--	--	--	--	--	--	--	--	--	--	--	--	--	--	--	--	--	--	--	--	-	-	-	--
Unigene175_sinensis	4116	30	270	1.3084	14.1157	3.43142510441178	Up	9.9057e-60	1.04881491382979e-57	gi|405977997|gb|EKC42416.1|	287.3	4e-75	hypothetical protein CGI_10015717 [Crassostrea gigas]	--	--	--	--	sp|P08799|MYS2_DICDI	159	5e-38	Myosin-2 heavy chain OS=Dictyostelium discoideum GN=mhcA PE=1 SV=3	PAB0812	124	1e-27	COG0419	ATPase involved in DNA repair	K00907	7e-42	174	dme:Dmel_CG18255	myosin-light-chain kinase [EC:2.7.11.18]	-	-	-	--
CL6764.Contig1_sinensis	263	6	54	4.0954	44.1828	3.43140857692548	Up	4.8475e-13	1.62756856626506e-11	--	--	--	--	--	--	--	--	--	--	--	--	--	--	--	--	--	--	--	--	--	--	-	-	-	--
Unigene36295_sinensis	447	2	18	0.8032	8.6652	3.43140187396604	Up	4.2784e-05	0.000606700284144107	--	--	--	--	--	--	--	--	--	--	--	--	--	--	--	--	--	--	--	--	--	--	-	-	-	--
Unigene5515_sinensis	1138	2	18	0.3155	3.4037	3.43139197406374	Up	4.2784e-05	0.000606206730933496	gi|405960205|gb|EKC26146.1|	77.0	2e-12	Reticulocyte-binding protein 2-like protein a [Crassostrea gigas]	--	--	--	--	--	--	--	--	--	--	--	--	--	--	--	--	--	--	-	-	-	--
CL5648.Contig2_sinensis	1375	5	45	0.6528	7.0425	3.43137469617816	Up	4.51292e-11	1.34882292355212e-09	gi|405951621|gb|EKC19518.1|	273.5	1e-71	hypothetical protein CGI_10008375 [Crassostrea gigas]	--	--	--	--	--	--	--	--	--	--	--	--	--	--	--	--	--	--	-	-	-	--
CL8671.Contig3_sinensis	1183	2	18	0.3035	3.2742	3.43137402795075	Up	4.2784e-05	0.000607070976782077	gi|260830778|ref|XP_002610337.1|	143.3	2e-32	hypothetical protein BRAFLDRAFT_209314 [Branchiostoma floridae] >gi|229295702|gb|EEN66347.1| hypothetical protein BRAFLDRAFT_209314 [Branchiostoma floridae]	--	--	--	--	sp|P04634|LIPG_RAT	120	6e-27	Gastric triacylglycerol lipase OS=Rattus norvegicus GN=Lipf PE=2 SV=1	--	--	--	--	--	K01052	7e-32	138	bfo:BRAFLDRAFT_72470	lysosomal acid lipase/cholesteryl ester hydrolase [EC:3.1.1.13]	-	-	-	--
CL9524.Contig1_sinensis	571	2	18	0.6288	6.7835	3.43135671256571	Up	4.2784e-05	0.000605837092682927	gi|405978806|gb|EKC43168.1|	76.3	9e-13	Caspase-7 [Crassostrea gigas]	--	--	--	--	--	--	--	--	--	--	--	--	--	K04397	5e-07	54.3	tad:TRIADDRAFT_50539	caspase 7 [EC:3.4.22.60]	-	-	-	--
CL443.Contig1_sinensis	2997	2	18	0.1198	1.2924	3.43135284247658	Up	4.2784e-05	0.000607318356968215	gi|405953052|gb|EKC20784.1|	1191.4	0.0	Dynein heavy chain 1, axonemal [Crassostrea gigas]	gi|390366275|ref|XM_791341.3|	147	4e-31	PREDICTED: Strongylocentrotus purpuratus dynein heavy chain 6, axonemal-like (LOC591790), partial mRNA	sp|Q9C0G6|DYH6_HUMAN	558	3e-158	Dynein heavy chain 6, axonemal OS=Homo sapiens GN=DNAH6 PE=1 SV=3	YKR054c	238	3e-62	COG5245	Dynein, heavy chain	K10408	1e-142	508	mgp:100541266	dynein heavy chain, axonemal	-	-	-	--
CL10537.Contig2_sinensis	549	2	18	0.6540	7.0553	3.43134488845151	Up	4.2784e-05	0.000606330043938161	gi|195037210|ref|XP_001990057.1|	54.7	2e-06	GH18446 [Drosophila grimshawi] >gi|193894253|gb|EDV93119.1| GH18446 [Drosophila grimshawi]	--	--	--	--	sp|P25723|TLD_DROME	73.2	3e-13	Dorsal-ventral patterning protein tolloid OS=Drosophila melanogaster GN=tld PE=2 SV=2	--	--	--	--	--	K13045	2e-13	75.9	dgr:Dgri_GH18446	tolloid [EC:3.4.24.-]	-	GO:0005515//protein binding	-	--
Unigene23863_sinensis	1210	3	27	0.4451	4.8017	3.43134386396446	Up	4.17466e-07	8.22291172010178e-06	gi|443725508|gb|ELU13080.1|	431.0	5e-119	hypothetical protein CAPTEDRAFT_200137 [Capitella teleta]	--	--	--	--	sp|Q6ZWH5|NEK10_HUMAN	334	2e-91	Serine/threonine-protein kinase Nek10 OS=Homo sapiens GN=NEK10 PE=2 SV=3	--	--	--	--	--	K00924	4e-23	109	cel:D1044.8	[EC:2.7.1.-]	-	GO:0016301//kinase activity	-	--
CL4704.Contig1_sinensis	1261	3	27	0.4271	4.6075	3.4313383627633	Up	4.17466e-07	8.21594315084746e-06	gi|291224795|ref|XP_002732388.1|	70.1	2e-10	PREDICTED: hypothetical protein [Saccoglossus kowalevskii]	--	--	--	--	--	--	--	--	--	--	--	--	--	--	--	--	--	--	-	-	-	--
CL967.Contig2_sinensis	1093	4	36	0.6570	7.0876	3.43133190973661	Up	4.27946e-09	1.06632939463519e-07	gi|162077122|gb|ABX82465.1|	58.9	5e-07	dentin sialophosphoprotein [Homo sapiens]	--	--	--	--	sp|P97399|DSPP_MOUSE	53.1	1e-06	Dentin sialophosphoprotein OS=Mus musculus GN=Dspp PE=1 SV=2	--	--	--	--	--	--	--	--	--	--	-	-	-	--
Unigene25430_sinensis	710	2	18	0.5057	5.4554	3.43133129791323	Up	4.2784e-05	0.000606083468076454	gi|405953496|gb|EKC21148.1|	134.8	3e-30	Ganglioside GM2 activator [Crassostrea gigas]	--	--	--	--	sp|Q60648|SAP3_MOUSE	84.0	3e-16	Ganglioside GM2 activator OS=Mus musculus GN=Gm2a PE=1 SV=2	--	--	--	--	--	K12383	3e-17	89.0	xtr:548463	ganglioside GM2 activator	GO:0009313//oligosaccharide catabolic process;GO:0007611//learning or memory;GO:0050885//neuromuscular process controlling balance;GO:0019915//lipid storage;GO:0006689//ganglioside catabolic process;GO:0043085//positive regulation of catalytic activity	GO:0008047//enzyme activator activity;GO:0004563//beta-N-acetylhexosaminidase activity	GO:0005739//mitochondrion;GO:0044459//plasma membrane part	--
CL6113.Contig1_sinensis	775	2	18	0.4633	4.9979	3.43130344820502	Up	4.2784e-05	0.000606947362248015	--	--	--	--	--	--	--	--	--	--	--	--	--	--	--	--	--	--	--	--	--	--	-	-	-	--
Unigene25860_sinensis	990	2	18	0.3627	3.9125	3.43124210162443	Up	4.2784e-05	0.000606823798045603	gi|198426020|ref|XP_002124556.1|	72.8	3e-11	PREDICTED: ankyrin repeat domain-containing protein 42-like [Ciona intestinalis]	--	--	--	--	sp|Q3V096|ANR42_MOUSE	403	4e-112	Ankyrin repeat domain-containing protein 42 OS=Mus musculus GN=Ankrd42 PE=2 SV=1	all2748	112	1e-24	COG0666	FOG: Ankyrin repeat	K10380	2e-38	160	spu:754357	ankyrin	-	-	-	--
CL8024.Contig1_sinensis	1231	2	18	0.2917	3.1465	3.43119065156124	Up	4.2784e-05	0.000606576820512821	--	--	--	--	--	--	--	--	--	--	--	--	--	--	--	--	--	--	--	--	--	--	-	-	-	--
Unigene29511_sinensis	3349	240	2153	12.8646	138.3388	3.4267273420853	Up	0	0	gi|291221923|ref|XP_002730968.1|	59.3	1e-06	PREDICTED: kelch-like 26-like [Saccoglossus kowalevskii]	--	--	--	--	sp|Q25390|SCRA_LIMPO	142	6e-33	Alpha-scruin OS=Limulus polyphemus PE=2 SV=1	--	--	--	--	--	K10445	7e-29	130	oaa:100083167	kelch-like protein 7	-	-	GO:0044424//intracellular part	--
Unigene32367_sinensis	1955	799	7120	73.3671	783.6971	3.41709099283934	Up	0	0	gi|405967146|gb|EKC32346.1|	400.2	2e-109	hypothetical protein CGI_10017500 [Crassostrea gigas]	--	--	--	--	sp|A7MBH5|CC151_BOVIN	154	9e-37	Coiled-coil domain-containing protein 151 OS=Bos taurus GN=CCDC151 PE=2 SV=1	MK0690	82.8	2e-15	COG0419	ATPase involved in DNA repair	K04514	1e-12	75.9	mmu:19878	Rho-associated, coiled-coil containing protein kinase [EC:2.7.11.1]	-	-	-	--
Unigene26592_sinensis	426	28	249	11.7991	125.7780	3.41413087610295	Up	5.79126e-55	5.79700133534483e-53	--	--	--	--	--	--	--	--	--	--	--	--	--	--	--	--	--	--	--	--	--	--	-	-	-	--
CL7428.Contig3_sinensis	2875	8	71	0.4995	5.3142	3.41129594157022	Up	1.149742e-16	4.65164781637631e-15	gi|405973828|gb|EKC38519.1|	67.8	3e-09	Zinc finger SWIM domain-containing protein 2 [Crassostrea gigas]	gi|156391258|ref|XM_001635636.1|	79.8	7e-11	Nematostella vectensis predicted protein (NEMVEDRAFT_v1g36807) partial mRNA	sp|Q8NEG5|ZSWM2_HUMAN	360	1e-98	E3 ubiquitin-protein ligase ZSWIM2 OS=Homo sapiens GN=ZSWIM2 PE=1 SV=2	--	--	--	--	--	K15716	3e-125	450	spu:583425	E3 ubiquitin-protein ligase ZSWIM2 [EC:6.3.2.19]	-	GO:0005488//binding	-	--
Unigene33901_sinensis	4039	100	886	4.4445	47.2036	3.40880385932049	Up	5.03866e-191	1.52625392843478e-188	gi|156402337|ref|XP_001639547.1|	75.5	2e-11	predicted protein [Nematostella vectensis] >gi|156226676|gb|EDO47484.1| predicted protein [Nematostella vectensis]	gi|470293457|ref|XM_004343848.1|	63.9	6e-06	Capsaspora owczarzaki ATCC 30864 predicted protein (CAOG_07174) mRNA, complete cds	sp|Q55F68|CYAD_DICDI	149	6e-35	Adenylate cyclase, terminal-differentiation specific OS=Dictyostelium discoideum GN=acrA PE=1 SV=1	YDR145w	64.7	1e-09	COG5624	Transcription initiation factor TFIID, subunit TAF12 (also component of histone acetyltransferase SAGA)	K14972	1e-29	133	aga:AgaP_AGAP004734	PAX-interacting protein 1	-	-	-	--
Unigene27088_sinensis	1401	183	1618	23.4485	248.5166	3.40577468012186	Up	0	0	gi|347968463|ref|XP_312188.5|	55.8	6e-06	AGAP002737-PA [Anopheles gambiae str. PEST] >gi|333467991|gb|EAA07771.5| AGAP002737-PA [Anopheles gambiae str. PEST]	--	--	--	--	sp|Q28092|CYLC2_BOVIN	52.8	2e-06	Cylicin-2 OS=Bos taurus GN=CYLC2 PE=1 SV=1	--	--	--	--	--	K08818	8e-07	55.8	spu:585189	cell division cycle 2-like [EC:2.7.11.22]	-	-	-	--
CL9537.Contig1_sinensis	2339	2539	22397	194.8651	2060.5095	3.40245348051913	Up	0	0	gi|405971771|gb|EKC36584.1|	157.5	2e-36	Tax1-binding protein 1-like protein B [Crassostrea gigas]	--	--	--	--	sp|O18737|CACO2_BOVIN	67.0	2e-10	Calcium-binding and coiled-coil domain-containing protein 2 OS=Bos taurus GN=CALCOCO2 PE=2 SV=1	--	--	--	--	--	K01106	2e-07	58.5	bta:514123	inositol-1,4,5-trisphosphate 5-phosphatase [EC:3.1.3.56]	-	-	-	--
Unigene9969_sinensis	2640	57	502	3.8759	40.9180	3.40013237625471	Up	9.42296e-109	1.60119073229268e-106	gi|405958518|gb|EKC24640.1|	766.1	0.0	hypothetical protein CGI_10014552 [Crassostrea gigas]	--	--	--	--	sp|P37709|TRHY_RABIT	91.3	1e-17	Trichohyalin OS=Oryctolagus cuniculus GN=TCHH PE=2 SV=1	AF1032	66.6	2e-10	COG0419	ATPase involved in DNA repair	K00907	8e-17	90.1	der:Dere_GG25360	myosin-light-chain kinase [EC:2.7.11.18]	-	-	-	--
CL5575.Contig4_sinensis	4474	10	88	0.4012	4.2325	3.39911655705819	Up	2.80468e-20	1.33105756757493e-18	gi|18029449|gb|AAL56548.1|AF387862_2	147.5	6e-33	pol polyprotein [Anopheles gambiae]	--	--	--	--	sp|P04146|COPIA_DROME	117	2e-25	Copia protein OS=Drosophila melanogaster GN=GIP PE=1 SV=3	--	--	--	--	--	K05658	2e-26	123	acs:100566687	ATP-binding cassette, subfamily B (MDR/TAP), member 1	-	-	-	--
Unigene30281_sinensis	810	34	298	7.5352	79.1674	3.393188761866	Up	4.1107e-65	4.65672127317073e-63	--	--	--	--	--	--	--	--	--	--	--	--	--	--	--	--	--	--	--	--	--	--	-	-	-	--
CL187.Contig1_sinensis	1954	80	701	7.3497	77.1984	3.39281367842016	Up	7.08772e-151	1.6459812156e-148	gi|291233219|ref|XP_002736551.1|	359.0	5e-97	PREDICTED: hypothetical protein [Saccoglossus kowalevskii]	--	--	--	--	sp|Q569B9|CK065_RAT	61.2	8e-09	Uncharacterized protein C11orf65 homolog OS=Rattus norvegicus PE=2 SV=1	--	--	--	--	--	--	--	--	--	--	-	-	-	--
CL1381.Contig2_sinensis	919	82	718	16.0177	168.1218	3.39176789844599	Up	1.898724e-154	4.59313202625e-152	gi|405963467|gb|EKC29037.1|	246.9	1e-63	hypothetical protein CGI_10017002 [Crassostrea gigas]	--	--	--	--	sp|Q9DAN9|CQ105_MOUSE	99.4	1e-20	Uncharacterized protein C17orf105 homolog OS=Mus musculus PE=2 SV=1	--	--	--	--	--	K10590	2e-46	186	bfo:BRAFLDRAFT_79014	E3 ubiquitin-protein ligase TRIP12 [EC:6.3.2.19]	GO:0019538//protein metabolic process	GO:0046872//metal ion binding;GO:0003824//catalytic activity	-	--
Unigene25117_sinensis	1602	4	35	0.4482	4.7013	3.39084519096185	Up	8.51224e-09	2.05203892235294e-07	gi|405953098|gb|EKC20821.1|	268.5	7e-70	Putative tubulin polyglutamylase TTLL2 [Crassostrea gigas]	--	--	--	--	sp|Q9BWV7|TTLL2_HUMAN	60.5	1e-08	Probable tubulin polyglutamylase TTLL2 OS=Homo sapiens GN=TTLL2 PE=5 SV=3	--	--	--	--	--	--	--	--	--	--	GO:0006464//cellular protein modification process	GO:0004835//tubulin-tyrosine ligase activity	-	--
CL2516.Contig4_sinensis	2075	20	175	1.7303	18.1483	3.390740313815	Up	7.52484e-39	5.78002291025358e-37	gi|405975833|gb|EKC40375.1|	154.5	2e-35	Doublecortin domain-containing protein 2 [Crassostrea gigas]	--	--	--	--	sp|D3ZR10|DCDC2_RAT	84.7	7e-16	Doublecortin domain-containing protein 2 OS=Rattus norvegicus GN=Dcdc2 PE=2 SV=1	--	--	--	--	--	--	--	--	--	--	GO:0044699	-	-	--
Unigene30843_sinensis	2332	158	1382	12.1627	127.5248	3.39024240454226	Up	1.926648e-295	9.58768853657142e-293	gi|405963849|gb|EKC29387.1|	622.9	2e-176	RIB43A-like with coiled-coils protein 2 [Crassostrea gigas]	gi|291230575|ref|XM_002735201.1|	65.9	8e-07	PREDICTED: Saccoglossus kowalevskii predicted protein-like (LOC100375219), mRNA	sp|Q9H4K1|RIBC2_HUMAN	291	4e-78	RIB43A-like with coiled-coils protein 2 OS=Homo sapiens GN=RIBC2 PE=2 SV=1	MK0690	69.3	3e-11	COG0419	ATPase involved in DNA repair	K05702	9e-12	73.2	hmg:100201659	afadin	-	-	-	--
Unigene806_sinensis	1298	35	306	4.8406	50.7296	3.38956999692529	Up	9.3787e-67	1.0890077505e-64	gi|291238162|ref|XP_002738993.1|	366.3	1e-99	PREDICTED: hypothetical protein [Saccoglossus kowalevskii]	gi|55700192|gb|AC124976.9|	67.9	1e-07	Mus musculus chromosome 3, clone RP24-84E6, complete sequence	sp|P0CW27|CC166_HUMAN	161	3e-39	Coiled-coil domain-containing protein 166 OS=Homo sapiens GN=CCDC166 PE=4 SV=1	aq_629	60.5	6e-09	COG1196	Chromosome segregation ATPases	K10394	6e-14	79.3	spu:373530	kinesin family member 3/17	-	-	-	--
Unigene39253_sinensis	715	59	515	14.8132	154.9945	3.38726178668044	Up	3.81952e-111	6.652553472e-109	gi|405977198|gb|EKC41660.1|	225.3	2e-57	UPF0686 protein C11orf1-like protein [Crassostrea gigas]	--	--	--	--	sp|Q4R5Y0|CK001_MACFA	124	1e-28	UPF0686 protein C11orf1 homolog OS=Macaca fascicularis GN=QtsA-19889 PE=2 SV=1	--	--	--	--	--	--	--	--	--	--	-	-	-	--
CL3900.Contig3_sinensis	1359	27	235	3.5665	37.2103	3.3831211432535	Up	1.517414e-51	1.4601756348895e-49	gi|123448346|ref|XP_001312904.1|	63.9	2e-08	viral A-type inclusion protein [Trichomonas vaginalis G3]	--	--	--	--	sp|P14105|MYH9_CHICK	54.3	6e-07	Myosin-9 OS=Gallus gallus GN=MYH9 PE=2 SV=1	--	--	--	--	--	K10352	2e-06	54.3	gga:396469	myosin heavy chain	-	-	-	--
CL5782.Contig1_sinensis	1119	915	7936	146.7887	1526.1126	3.3780485944848	Up	0	0	--	--	--	--	--	--	--	--	--	--	--	--	--	--	--	--	--	--	--	--	--	--	-	-	-	--
Unigene1986_sinensis	847	3	26	0.6358	6.6055	3.37702284809232	Up	8.31672e-07	1.57536042871126e-05	gi|405963693|gb|EKC29249.1|	176.4	1e-42	Annexin A13 [Crassostrea gigas]	--	--	--	--	sp|Q9DAN9|CQ105_MOUSE	78.6	2e-14	Uncharacterized protein C17orf105 homolog OS=Mus musculus PE=2 SV=1	--	--	--	--	--	K10590	1e-20	100	bfo:BRAFLDRAFT_79014	E3 ubiquitin-protein ligase TRIP12 [EC:6.3.2.19]	-	-	-	--
Unigene7229_sinensis	2232	15	130	1.2064	12.5333	3.37698608538991	Up	3.92422e-29	2.47193926925859e-27	gi|405968601|gb|EKC33659.1|	534.6	8e-150	DC-STAMP domain-containing protein 1 [Crassostrea gigas]	--	--	--	--	sp|Q5T197|DCST1_HUMAN	320	1e-86	DC-STAMP domain-containing protein 1 OS=Homo sapiens GN=DCST1 PE=2 SV=1	--	--	--	--	--	--	--	--	--	--	-	-	-	--
CL6043.Contig2_sinensis	2978	30	260	1.8084	18.7873	3.37697201814668	Up	9.03454e-57	9.16197041135371e-55	gi|270008133|gb|EFA04581.1|	129.0	1e-27	signal-transducer and activator of transcription protein [Tribolium castaneum]	--	--	--	--	sp|Q9TUZ0|STA5B_PIG	118	9e-26	Signal transducer and activator of transcription 5B OS=Sus scrofa GN=STAT5B PE=2 SV=1	--	--	--	--	--	K11224	2e-28	129	tca:657965	signal transducer and activator of transcription 5B	GO:2000026//regulation of multicellular organismal development;GO:0030098//lymphocyte differentiation;GO:0019752//carboxylic acid metabolic process;GO:1901360;GO:0044238//primary metabolic process;GO:1901564;GO:0046483//heterocycle metabolic process;GO:0022414//reproductive process;GO:0010033//response to organic substance;GO:0051251//positive regulation of lymphocyte activation;GO:0045595//regul…	-	-	--
Unigene32392_sinensis	407	3	26	1.3232	13.7466	3.37697179065225	Up	8.31672e-07	1.57450425456522e-05	--	--	--	--	--	--	--	--	--	--	--	--	--	--	--	--	--	--	--	--	--	--	-	-	-	--
Unigene7612_sinensis	934	3	26	0.5766	5.9902	3.37696143038267	Up	8.31672e-07	1.57493222527861e-05	gi|156359821|ref|XP_001624963.1|	127.1	1e-27	predicted protein [Nematostella vectensis] >gi|156211771|gb|EDO32863.1| predicted protein [Nematostella vectensis]	--	--	--	--	sp|Q9NZJ4|SACS_HUMAN	99.4	1e-20	Sacsin OS=Homo sapiens GN=SACS PE=1 SV=2	PAE1155	52.0	1e-06	COG2250	Uncharacterized conserved protein related to C-terminal domain of eukaryotic chaperone, SACSIN	--	--	--	--	--	-	-	-	--
Unigene4489_sinensis	1677	24	208	2.5691	26.6898	3.37695354258246	Up	9.99028e-46	8.79915066144121e-44	gi|347968463|ref|XP_312188.5|	58.9	9e-07	AGAP002737-PA [Anopheles gambiae str. PEST] >gi|333467991|gb|EAA07771.5| AGAP002737-PA [Anopheles gambiae str. PEST]	--	--	--	--	sp|Q9W596|FUTSC_DROME	59.3	3e-08	Microtubule-associated protein futsch OS=Drosophila melanogaster GN=futsch PE=1 SV=4	--	--	--	--	--	K04574	4e-09	63.9	ssc:100156492	neurofilament heavy polypeptide	-	-	-	--
Unigene11539_sinensis	539	3	26	0.9992	10.3801	3.37690305525385	Up	8.31672e-07	1.57407651638142e-05	--	--	--	--	--	--	--	--	--	--	--	--	--	--	--	--	--	--	--	--	--	--	-	-	-	--
Unigene31587_sinensis	656	3	26	0.8210	8.5287	3.37687172621166	Up	8.31672e-07	1.57364901053775e-05	--	--	--	--	--	--	--	--	--	--	--	--	--	--	--	--	--	--	--	--	--	--	-	-	-	--
Unigene27101_sinensis	2854	265	2296	16.6684	173.1143	3.37653737079959	Up	0	0	gi|403360917|gb|EJY80154.1|	107.1	5e-21	Protein kinase domain containing protein [Oxytricha trifallax]	--	--	--	--	sp|Q13237|KGP2_HUMAN	85.1	8e-16	cGMP-dependent protein kinase 2 OS=Homo sapiens GN=PRKG2 PE=1 SV=1	slr0152	73.6	2e-12	COG0515	Serine/threonine protein kinase	K07376	5e-20	100	dvi:Dvir_GJ17940	protein kinase, cGMP-dependent [EC:2.7.11.12]	-	GO:0016301//kinase activity	-	--
Unigene31477_sinensis	808	20	173	4.4434	46.0733	3.37419500929128	Up	2.93496e-38	2.22983345954198e-36	gi|291239751|ref|XP_002739785.1|	202.2	2e-50	PREDICTED: hypothetical protein [Saccoglossus kowalevskii]	gi|390331361|ref|XM_003723211.1|	65.9	3e-07	PREDICTED: Strongylocentrotus purpuratus uncharacterized LOC100888691 (LOC100888691), mRNA	sp|Q8TD35|CT201_HUMAN	77.4	3e-14	Uncharacterized protein C20orf201 OS=Homo sapiens GN=C20orf201 PE=2 SV=3	--	--	--	--	--	--	--	--	--	--	-	-	-	--
CL281.Contig1_sinensis	1547	16	138	1.8567	19.1957	3.36997053829131	Up	8.79666e-31	5.76532930893697e-29	gi|405970539|gb|EKC35435.1|	344.0	1e-92	Uncharacterized protein C13orf26-like protein [Crassostrea gigas]	--	--	--	--	sp|Q0VB26|TEX26_MOUSE	62.4	3e-09	Testis-expressed sequence 26 protein OS=Mus musculus GN=Tex26 PE=1 SV=1	--	--	--	--	--	--	--	--	--	--	-	-	-	--
CL239.Contig1_sinensis	6687	8	69	0.2148	2.2204	3.36975369977617	Up	4.50822e-16	1.77950809733711e-14	gi|405967711|gb|EKC32844.1|	882.1	0.0	Adenylate cyclase type 10 [Crassostrea gigas]	--	--	--	--	sp|Q866F4|ADCYA_RABIT	255	8e-67	Adenylate cyclase type 10 OS=Oryctolagus cuniculus GN=ADCY10 PE=2 SV=1	SMa0579	62.0	1e-08	COG2114	Adenylate cyclase, family 3 (some proteins contain HAMP domain)	K11265	2e-171	605	spu:574069	adenylate cyclase 10 [EC:4.6.1.1]	-	-	-	--
Unigene23430_sinensis	1398	287	2469	36.8533	380.0397	3.36628441913032	Up	0	0	--	--	--	--	gi|161611442|gb|BC155659.1|	67.9	1e-07	Danio rerio zgc:172341, mRNA (cDNA clone MGC:172341 IMAGE:7052282), complete cds	--	--	--	--	--	--	--	--	--	--	--	--	--	--	-	-	-	--
Unigene1330_sinensis	4218	10	86	0.4256	4.3874	3.36579618715248	Up	1.097022e-19	5.07156109608494e-18	gi|405965980|gb|EKC31312.1|	257.3	5e-66	Telokin [Crassostrea gigas]	--	--	--	--	sp|A2ASS6|TITIN_MOUSE	107	3e-22	Titin OS=Mus musculus GN=Ttn PE=1 SV=1	--	--	--	--	--	K12567	7e-24	114	bfo:BRAFLDRAFT_79792	titin [EC:2.7.11.1]	-	-	-	--
Unigene30744_sinensis	592	5	43	1.5162	15.6301	3.3657950333735	Up	1.778362e-10	5.07357502776413e-09	gi|390343327|ref|XP_003725850.1|	57.4	4e-07	PREDICTED: uncharacterized protein LOC100889990 [Strongylocentrotus purpuratus]	--	--	--	--	--	--	--	--	--	--	--	--	--	K02832	6e-07	54.3	bfo:BRAFLDRAFT_215159	CASP2 and RIPK1 domain containing adaptor with death domain	-	-	-	--
Unigene4575_sinensis	996	5	43	0.9012	9.2902	3.36579043668431	Up	1.778362e-10	5.07149824715514e-09	gi|225542822|gb|ACN91294.1|	55.5	5e-06	dentin sialophosphoprotein precursor [Oryctolagus cuniculus]	--	--	--	--	sp|Q9NZW4|DSPP_HUMAN	67.8	4e-11	Dentin sialophosphoprotein OS=Homo sapiens GN=DSPP PE=1 SV=2	XF1267	53.1	7e-07	COG5297	Cellobiohydrolase A (1,4-beta-cellobiosidase A)	K14438	3e-08	60.1	mdo:100014311	chromodomain-helicase-DNA-binding protein 9 [EC:3.6.4.12]	-	-	-	--
Unigene5382_sinensis	2276	20	172	1.5775	16.2619	3.36578391784516	Up	5.79132e-38	4.376089729718e-36	gi|145503351|ref|XP_001437652.1|	213.4	4e-53	hypothetical protein [Paramecium tetraurelia strain d4-2] >gi|124404804|emb|CAK70255.1| unnamed protein product [Paramecium tetraurelia]	--	--	--	--	--	--	--	--	--	--	--	--	--	--	--	--	--	--	-	-	-	--
Unigene32528_sinensis	2581	114	979	7.9290	81.6225	3.36375606849098	Up	2.39648e-208	7.8385147943662e-206	gi|405966072|gb|EKC31394.1|	1118.6	0.0	Putative adenylate kinase 7 [Crassostrea gigas]	gi|459183139|ref|XM_002126776.2|	103	4e-18	PREDICTED: Ciona intestinalis adenylate kinase 7 (ak7), mRNA	sp|Q96M32|KAD7_HUMAN	721	0.0	Adenylate kinase 7 OS=Homo sapiens GN=AK7 PE=1 SV=3	all4196	60.5	1e-08	COG0563	Adenylate kinase and related kinases	K00939	0.0	953	bfo:BRAFLDRAFT_260836	adenylate kinase [EC:2.7.4.3]	GO:0006139//nucleobase-containing compound metabolic process	GO:0004017//adenylate kinase activity;GO:0005524//ATP binding;GO:0004127//cytidylate kinase activity	-	--
Unigene21001_sinensis	869	103	884	21.2774	218.9009	3.36288411004728	Up	2.898e-188	8.48322529411765e-186	gi|405965518|gb|EKC30887.1|	245.4	2e-63	hypothetical protein CGI_10028568 [Crassostrea gigas]	--	--	--	--	sp|A8Y5T1|CA194_DANRE	145	8e-35	Uncharacterized protein C1orf194 homolog OS=Danio rerio GN=si:ch211-163l21.7 PE=4 SV=1	--	--	--	--	--	--	--	--	--	--	-	-	-	--
Unigene30972_sinensis	2104	61	523	5.2046	53.4898	3.36140461497214	Up	4.58928e-112	8.03343086231156e-110	gi|405950283|gb|EKC18280.1|	430.3	2e-118	Vesicular glutamate transporter 1 [Crassostrea gigas]	--	--	--	--	sp|A6QLI1|VGLU2_BOVIN	314	4e-85	Vesicular glutamate transporter 2 OS=Bos taurus GN=SLC17A6 PE=2 SV=1	TVN0176	90.1	1e-17	COG0477	Permeases of the major facilitator superfamily	K12302	2e-84	314	mdo:100618682	MFS transporter, ACS family, solute carrier family 17 (sodium-dependent inorganic phosphate cotransporter), member 6/7/8	-	-	-	--
CL622.Contig3_sinensis	743	7	60	1.6913	17.3771	3.36098284577455	Up	4.1059e-14	1.46394036386899e-12	gi|405963848|gb|EKC29386.1|	132.5	1e-29	hypothetical protein CGI_10012092 [Crassostrea gigas]	--	--	--	--	--	--	--	--	--	--	--	--	--	--	--	--	--	--	-	-	-	--
CL1898.Contig2_sinensis	2199	63	539	5.1430	52.7447	3.3583440744885	Up	2.41054e-115	4.32834822835051e-113	gi|354481857|ref|XP_003503117.1|	67.8	2e-09	PREDICTED: hypothetical protein LOC100763491 [Cricetulus griseus]	--	--	--	--	sp|Q54MB1|Y4579_DICDI	59.3	3e-08	Uncharacterized SDCCAG3 family protein OS=Dictyostelium discoideum GN=DDB_G0286065 PE=3 SV=1	--	--	--	--	--	K14826	6e-07	57.0	api:100161842	FK506-binding nuclear protein [EC:5.2.1.8]	-	-	-	--
CL7176.Contig1_sinensis	3804	22	188	1.0382	10.6349	3.35665016974109	Up	2.9526e-41	2.41154383821805e-39	gi|405977373|gb|EKC41830.1|	1325.1	0.0	Dynein heavy chain 1, axonemal [Crassostrea gigas]	gi|295852905|ref|XR_086591.2|	210	4e-50	PREDICTED: Saccoglossus kowalevskii dynein heavy chain at 36C-like (LOC100377990), miscRNA	sp|Q63164|DYH1_RAT	1160	0.0	Dynein heavy chain 1, axonemal OS=Rattus norvegicus GN=Dnah1 PE=2 SV=2	--	--	--	--	--	K10408	0.0	1219	bfo:BRAFLDRAFT_276972	dynein heavy chain, axonemal	GO:0006200//ATP catabolic process;GO:0001539//ciliary or flagellar motility;GO:0007018//microtubule-based movement	GO:0003777//microtubule motor activity;GO:0016887//ATPase activity	GO:0005858//axonemal dynein complex	--
CL857.Contig2_sinensis	4827	6	51	0.2231	2.2736	3.34921604099864	Up	3.7761e-12	1.20788388842975e-10	gi|405968936|gb|EKC33959.1|	89.4	2e-15	Serine/threonine-protein kinase Nek8 [Crassostrea gigas]	gi|260786460|ref|XM_002588230.1|	101	3e-17	Branchiostoma floridae hypothetical protein, mRNA	sp|Q91ZR4|NEK8_MOUSE	444	1e-123	Serine/threonine-protein kinase Nek8 OS=Mus musculus GN=Nek8 PE=1 SV=1	YAR018c	128	8e-29	COG0515	Serine/threonine protein kinase	K08857	7e-137	489	cel:Y39G10AR.3	NIMA (never in mitosis gene a)-related kinase [EC:2.7.11.1]	GO:0044763;GO:0061326//renal tubule development;GO:0072116//pronephros formation;GO:0001947//heart looping	GO:0005488//binding;GO:0004672//protein kinase activity	GO:0072372//primary cilium	--
Unigene31014_sinensis	978	6	51	1.1013	11.2214	3.34897325475684	Up	3.7761e-12	1.20732955897201e-10	--	--	--	--	--	--	--	--	--	--	--	--	--	--	--	--	--	--	--	--	--	--	-	-	-	--
Unigene26203_sinensis	508	18	153	6.3608	64.8101	3.34893852980811	Up	8.75072e-34	6.10875663006012e-32	--	--	--	--	--	--	--	--	--	--	--	--	--	--	--	--	--	--	--	--	--	--	-	-	-	--
CL712.Contig3_sinensis	1588	28	238	3.1653	32.2509	3.34892527460026	Up	1.02708e-51	9.89704516182573e-50	gi|342182678|emb|CCC92157.1|	79.0	8e-13	unnamed protein product [Trypanosoma congolense IL3000]	--	--	--	--	sp|Q9JL04|FMN2_MOUSE	67.8	7e-11	Formin-2 OS=Mus musculus GN=Fmn2 PE=1 SV=2	STM0960	52.8	2e-06	COG1674	DNA segregation ATPase FtsK/SpoIIIE and related proteins	K12826	7e-13	76.3	xla:379832	splicing factor 3A subunit 2	-	GO:0005488//binding	-	--
CL10050.Contig1_sinensis	988	4	34	0.7268	7.4052	3.34890837573313	Up	1.688824e-08	3.94562975372233e-07	gi|405970778|gb|EKC35654.1|	352.8	1e-95	IQ domain-containing protein K [Crassostrea gigas]	--	--	--	--	sp|Q8N0W5|IQCK_HUMAN	176	5e-44	IQ domain-containing protein K OS=Homo sapiens GN=IQCK PE=2 SV=1	--	--	--	--	--	--	--	--	--	--	-	-	-	--
CL1598.Contig1_sinensis	1383	25	212	3.2450	32.9859	3.34555908516114	Up	3.41848e-46	3.02620181855146e-44	gi|405971402|gb|EKC36241.1|	503.8	8e-141	Coiled-coil domain-containing protein 96 [Crassostrea gigas]	gi|291226618|ref|XM_002733244.1|	85.7	5e-13	PREDICTED: Saccoglossus kowalevskii coiled-coil domain containing 96-like (LOC100374161), mRNA	sp|Q95LS7|CCD96_MACFA	305	1e-82	Coiled-coil domain-containing protein 96 OS=Macaca fascicularis GN=CCDC96 PE=2 SV=1	MK0690	63.2	1e-09	COG0419	ATPase involved in DNA repair	K10352	2e-11	71.2	dsi:Dsim_GD24899	myosin heavy chain	-	-	-	--
Unigene28847_sinensis	1663	57	483	6.1530	62.4985	3.34445966702668	Up	3.76678e-103	6.08881196798144e-101	gi|405964422|gb|EKC29910.1|	204.1	1e-50	3-mercaptopyruvate sulfurtransferase [Crassostrea gigas]	--	--	--	--	sp|P24329|THTR_RAT	203	1e-51	Thiosulfate sulfurtransferase OS=Rattus norvegicus GN=Tst PE=1 SV=3	BMEI0931	163	7e-40	COG2897	Rhodanese-related sulfurtransferase	K01011	4e-51	203	rno:25274	thiosulfate/3-mercaptopyruvate sulfurtransferase [EC:2.8.1.1 2.8.1.2]	GO:0044248//cellular catabolic process;GO:0035928//rRNA import into mitochondrion;GO:1901565;GO:0034641//cellular nitrogen compound metabolic process;GO:0000096//sulfur amino acid metabolic process	GO:0008097//5S rRNA binding	GO:0005743//mitochondrial inner membrane;GO:0005886//plasma membrane	--
Unigene29654_sinensis	834	26	220	5.5964	56.7638	3.34240018527905	Up	7.74362e-48	7.06139086099476e-46	gi|405968708|gb|EKC33754.1|	404.4	3e-111	Cytochrome b5 domain-containing protein 1 [Crassostrea gigas]	gi|241913771|gb|GQ139543.1|	83.8	1e-12	Pinctada maxima cytochrome b5 domain containing 1 mRNA, complete cds	sp|Q567I9|CB5D1_DANRE	313	4e-85	Cytochrome b5 domain-containing protein 1 OS=Danio rerio GN=cyb5d1 PE=2 SV=1	--	--	--	--	--	--	--	--	--	--	-	GO:0020037//heme binding;GO:0046872//metal ion binding	-	--
Unigene33306_sinensis	1608	104	879	11.6104	117.6299	3.34076523950376	Up	4.43182e-186	1.28650194825e-183	gi|443692519|gb|ELT94112.1|	356.3	2e-96	hypothetical protein CAPTEDRAFT_139464 [Capitella teleta]	gi|338724719|ref|XM_003364952.1|	73.8	2e-09	PREDICTED: Equus caballus vasohibin 2, transcript variant 2 (VASH2), mRNA	sp|Q7L8A9|VASH1_HUMAN	330	6e-90	Vasohibin-1 OS=Homo sapiens GN=VASH1 PE=1 SV=1	--	--	--	--	--	--	--	--	--	--	GO:0043537//negative regulation of blood vessel endothelial cell migration;GO:0001937//negative regulation of endothelial cell proliferation;GO:0016525//negative regulation of angiogenesis;GO:0009611//response to wounding;GO:1901491//negative regulation of lymphangiogenesis;GO:2000772//regulation of cellular senescence	-	GO:0005615//extracellular space;GO:0045177//apical part of cell;GO:0005783//endoplasmic reticulum	--
Unigene6450_sinensis	2070	102	861	8.8457	89.5051	3.3389216699838	Up	3.24806e-182	9.19874358292683e-180	gi|405958785|gb|EKC24877.1|	561.6	5e-158	Kelch-like protein 10 [Crassostrea gigas]	--	--	--	--	sp|Q6JEL2|KLH10_HUMAN	444	4e-124	Kelch-like protein 10 OS=Homo sapiens GN=KLHL10 PE=2 SV=1	--	--	--	--	--	K10448	3e-126	453	gga:420033	kelch-like protein 10	GO:0048856//anatomical structure development;GO:0044707;GO:0003006//developmental process involved in reproduction;GO:0044767	-	-	--
Unigene9973_sinensis	2655	132	1113	8.9251	90.2081	3.33731674350428	Up	6.75824e-235	2.51786001368984e-232	gi|123445779|ref|XP_001311646.1|	69.3	1e-09	hypothetical protein [Trichomonas vaginalis G3] >gi|121893464|gb|EAX98716.1| hypothetical protein TVAG_480920 [Trichomonas vaginalis G3]	--	--	--	--	--	--	--	--	--	--	--	--	--	--	--	--	--	--	-	-	-	--
Unigene32088_sinensis	1511	66	556	7.8412	79.1818	3.33602250057608	Up	3.31492e-118	6.09359265118733e-116	gi|405956899|gb|EKC23142.1|	124.0	2e-26	Transmembrane protein 2 [Crassostrea gigas]	--	--	--	--	--	--	--	--	--	--	--	--	--	--	--	--	--	--	-	-	-	--
Unigene27370_sinensis	2422	307	2584	22.7544	229.5796	3.33477700243514	Up	0	0	gi|405963167|gb|EKC28764.1|	111.7	1e-22	Speriolin [Crassostrea gigas]	--	--	--	--	sp|Q148B6|SPERI_MOUSE	89.0	5e-17	Speriolin OS=Mus musculus GN=Spatc1 PE=1 SV=1	--	--	--	--	--	--	--	--	--	--	-	GO:0005515//protein binding	GO:0005856//cytoskeleton	--
Unigene25269_sinensis	1952	286	2406	26.3019	265.2350	3.33403223783404	Up	0	0	gi|405975469|gb|EKC40032.1|	816.6	0.0	Tektin-3 [Crassostrea gigas]	--	--	--	--	sp|A6H782|TEKT3_BOVIN	401	3e-111	Tektin-3 OS=Bos taurus GN=TEKT3 PE=2 SV=1	--	--	--	--	--	K04688	6e-25	116	cqu:CpipJ_CPIJ003064	p70 ribosomal S6 kinase [EC:2.7.11.1]	-	-	-	--
Unigene28910_sinensis	1798	5	42	0.4992	5.0266	3.33189304944662	Up	3.5189e-10	9.78285092178771e-09	gi|405972749|gb|EKC37499.1|	798.5	0.0	High-affinity choline transporter 1 [Crassostrea gigas]	gi|195399629|ref|XM_002058386.1|	75.8	7e-10	Drosophila virilis GJ14405 (Dvir\GJ14405), mRNA	sp|Q9VE46|SC5A7_DROME	675	0.0	High-affinity choline transporter 1 OS=Drosophila melanogaster GN=CG7708 PE=2 SV=2	RSc0463	133	9e-31	COG0591	Na+/proline symporter	K14387	0.0	680	dpo:Dpse_GA20532	solute carrier family 5 (high affinity choline transporter), member 7	GO:0003333//amino acid transmembrane transport;GO:0008292//acetylcholine biosynthetic process	GO:0005298//proline:sodium symporter activity;GO:0015220//choline transmembrane transporter activity	GO:0016021//integral to membrane	--
CL296.Contig1_sinensis	2890	40	335	2.4846	24.9438	3.32759575197628	Up	1.003064e-71	1.25013355663685e-69	gi|405963904|gb|EKC29436.1|	352.8	6e-95	hypothetical protein CGI_10023826 [Crassostrea gigas]	--	--	--	--	sp|Q0VAA2|CN16B_HUMAN	213	1e-54	Uncharacterized protein C14orf166B OS=Homo sapiens GN=C14orf166B PE=2 SV=2	YMR235c	67.0	2e-10	COG5238	Ran GTPase-activating protein (RanGAP) involved in mRNA processing and transport	K10165	4e-20	101	mdo:100018299	nucleotide-binding oligomerization domain-containing protein 2	-	-	-	--
Unigene27698_sinensis	929	83	695	16.0385	160.9845	3.32731066342775	Up	5.8164e-147	1.32425742352941e-144	gi|291225624|ref|XP_002732801.1|	297.4	6e-79	PREDICTED: predicted protein-like [Saccoglossus kowalevskii]	--	--	--	--	sp|Q5EB30|ODF3A_XENTR	229	6e-60	Outer dense fiber protein 3 OS=Xenopus tropicalis GN=odf3 PE=2 SV=1	--	--	--	--	--	--	--	--	--	--	-	-	-	--
Unigene16817_sinensis	1639	517	4329	56.6257	568.3602	3.32727664713095	Up	0	0	gi|308466010|ref|XP_003095261.1|	56.2	6e-06	hypothetical protein CRE_18160 [Caenorhabditis remanei] >gi|308245545|gb|EFO89497.1| hypothetical protein CRE_18160 [Caenorhabditis remanei]	--	--	--	--	--	--	--	--	--	--	--	--	--	--	--	--	--	--	-	-	-	--
CL5753.Contig1_sinensis	3200	14	117	0.7854	7.8678	3.32446078156158	Up	5.23396e-26	3.01359305157025e-24	gi|405957312|gb|EKC23533.1|	217.6	3e-54	Deleted in malignant brain tumors 1 protein [Crassostrea gigas]	gi|220961621|gb|FJ550296.1|	65.9	1e-06	Thais clavigera clone Tcl128 microsatellite sequence	sp|Q9UGM3|DMBT1_HUMAN	350	1e-95	Deleted in malignant brain tumors 1 protein OS=Homo sapiens GN=DMBT1 PE=1 SV=2	DR1893	62.4	5e-09	COG0652	Peptidyl-prolyl cis-trans isomerase (rotamase) - cyclophilin family	K13912	2e-94	348	ptr:466221	deleted in malignant brain tumors 1 protein	-	-	-	--
Unigene30604_sinensis	2065	199	1663	17.2995	173.2955	3.3244319462411	Up	0	0	gi|405976434|gb|EKC40940.1|	452.6	3e-125	Testis-specific serine/threonine-protein kinase 1 [Crassostrea gigas]	--	--	--	--	sp|O54863|TSSK2_MOUSE	233	2e-60	Testis-specific serine/threonine-protein kinase 2 OS=Mus musculus GN=Tssk2 PE=1 SV=2	ECU01g0630	130	1e-29	COG0515	Serine/threonine protein kinase	K08811	2e-62	241	acs:100554441	testis-specific serine kinase [EC:2.7.11.1]	GO:0006468//protein phosphorylation;GO:0007286//spermatid development	GO:0004674//protein serine/threonine kinase activity;GO:0005515//protein binding;GO:0043167//ion binding	GO:0001669//acrosomal vesicle;GO:0005814//centriole	--
Unigene25749_sinensis	1140	96	801	15.1171	151.1968	3.32217429525754	Up	7.35936e-169	1.9275159843609e-166	gi|405965629|gb|EKC30991.1|	171.4	7e-41	hypothetical protein CGI_10024990 [Crassostrea gigas]	--	--	--	--	--	--	--	--	--	--	--	--	--	--	--	--	--	--	-	-	-	--
Unigene11450_sinensis	849	77	642	16.2811	162.7205	3.32112593654284	Up	1.171094e-135	2.44278287083832e-133	--	--	--	--	--	--	--	--	--	--	--	--	--	--	--	--	--	--	--	--	--	--	-	-	-	--
Unigene543_sinensis	493	3	25	1.0924	10.9121	3.32035564626456	Up	1.651316e-06	2.98974881507277e-05	--	--	--	--	--	--	--	--	sp|P02597|CALMS_CHICK	48.9	5e-06	Calmodulin, striated muscle OS=Gallus gallus GN=CCM1 PE=3 SV=2	--	--	--	--	--	--	--	--	--	--	-	-	-	--
Unigene6511_sinensis	663	3	25	0.8123	8.1141	3.32034653326	Up	1.651316e-06	2.98819569880519e-05	gi|405973117|gb|EKC37848.1|	120.9	4e-26	Polycystin-2 [Crassostrea gigas]	--	--	--	--	sp|O35245|PKD2_MOUSE	95.5	8e-20	Polycystin-2 OS=Mus musculus GN=Pkd2 PE=1 SV=2	--	--	--	--	--	K04990	1e-19	96.7	tad:TRIADDRAFT_28988	polycystin 2L1	GO:0051051//negative regulation of transport;GO:0001568//blood vessel development;GO:0051235;GO:0009628//response to abiotic stimulus;GO:0006874//cellular calcium ion homeostasis;GO:0060562//epithelial tube morphogenesis;GO:0071363//cellular response to growth factor stimulus;GO:0050852//T cell receptor signaling pathway;GO:0072001//renal system development;GO:0007050//cell cycle arrest;GO:000189…	GO:0005244//voltage-gated ion channel activity;GO:0005262//calcium channel activity;GO:0016301//kinase activity;GO:0046872//metal ion binding;GO:0042802//identical protein binding;GO:0015077//monovalent inorganic cation transmembrane transporter activity	GO:0045178//basal part of cell;GO:0043234//protein complex;GO:0044463;GO:0015630//microtubule cytoskeleton;GO:0005783//endoplasmic reticulum;GO:0005886//plasma membrane;GO:0072372//primary cilium;GO:0044430//cytoskeletal part;GO:0016021//integral to membrane	--
Unigene26017_sinensis	700	3	25	0.7694	7.6852	3.32027707041985	Up	1.651316e-06	2.98897205518316e-05	gi|363734343|ref|XP_003641381.1|	162.2	2e-38	PREDICTED: serum amyloid A protein-like [Gallus gallus]	gi|363734342|ref|XM_003641333.1|	77.8	6e-11	PREDICTED: Gallus gallus serum amyloid A protein-like (LOC100858103), mRNA	sp|P02740|SAA_ANAPL	155	1e-37	Serum amyloid A protein OS=Anas platyrhynchos PE=1 SV=2	--	--	--	--	--	--	--	--	--	--	-	-	GO:0005576//extracellular region	--
CL3147.Contig3_sinensis	2669	3	25	0.2018	2.0156	3.3202112818634	Up	1.651316e-06	2.99052597878867e-05	gi|322794382|gb|EFZ17486.1|	241.1	2e-61	hypothetical protein SINV_16528 [Solenopsis invicta]	--	--	--	--	sp|P97603|NEO1_RAT	221	9e-57	Neogenin (Fragment) OS=Rattus norvegicus GN=Neo1 PE=2 SV=1	SPBP4H10.20	114	1e-24	COG5075	Uncharacterized conserved protein	K06766	3e-56	221	ssc:100510914	neogenin	-	-	-	--
Unigene23956_sinensis	1025	52	433	9.1071	90.9032	3.3192674507249	Up	5.19394e-92	7.65024536701903e-90	gi|405978785|gb|EKC43147.1|	384.0	6e-105	Nucleoside diphosphate kinase-like protein 5 [Crassostrea gigas]	gi|395504588|ref|XM_003756582.1|	75.8	4e-10	PREDICTED: Sarcophilus harrisii NME/NM23 family member 5 (NME5), mRNA	sp|P56597|NDK5_HUMAN	307	3e-83	Nucleoside diphosphate kinase homolog 5 OS=Homo sapiens GN=NME5 PE=2 SV=1	VC0756	114	3e-25	COG0105	Nucleoside diphosphate kinase	K00940	3e-97	355	bfo:BRAFLDRAFT_61845	nucleoside-diphosphate kinase [EC:2.7.4.6]	GO:0043066//negative regulation of apoptotic process;GO:0006241//CTP biosynthetic process;GO:0021591//ventricular system development;GO:0006165//nucleoside diphosphate phosphorylation;GO:0009296//flagellum assembly;GO:0007286//spermatid development;GO:0006183//GTP biosynthetic process;GO:0006228//UTP biosynthetic process;GO:0003351//epithelial cilium movement	GO:0004550//nucleoside diphosphate kinase activity;GO:0005524//ATP binding	-	--
Unigene28921_sinensis	2073	362	3011	31.3481	312.5550	3.3176601723329	Up	0	0	gi|405976263|gb|EKC40776.1|	307.0	2e-81	Troponin C, skeletal muscle [Crassostrea gigas]	--	--	--	--	sp|P21797|TNNC1_BALNU	61.6	6e-09	Troponin C, isoform 1 OS=Balanus nubilis PE=1 SV=1	SPAC3A12.14	54.7	6e-07	COG5126	Ca2+-binding protein (EF-Hand superfamily)	K02183	4e-08	60.8	spu:591003	calmodulin	-	-	-	--
CL9200.Contig2_sinensis	2808	34	282	2.1736	21.6106	3.31358075217384	Up	2.1104e-60	2.26199165538462e-58	gi|405957220|gb|EKC23448.1|	884.0	0.0	Tetratricopeptide repeat protein 16 [Crassostrea gigas]	--	--	--	--	sp|Q95LZ5|TTC16_MACFA	364	5e-100	Tetratricopeptide repeat protein 16 OS=Macaca fascicularis GN=TTC16 PE=2 SV=1	all0889	105	6e-22	COG0457	FOG: TPR repeat	K09527	2e-12	75.9	aga:AgaP_AGAP008985	DnaJ homolog subfamily C member 7	-	-	-	--
CL5263.Contig1_sinensis	2132	7	58	0.5894	5.8540	3.31210378017211	Up	1.599904e-13	5.51254756557864e-12	gi|390357845|ref|XP_789321.3|	384.4	1e-104	PREDICTED: coiled-coil domain-containing protein 83-like [Strongylocentrotus purpuratus]	--	--	--	--	sp|Q95K40|CCD83_MACFA	230	1e-59	Coiled-coil domain-containing protein 83 OS=Macaca fascicularis GN=CCDC83 PE=2 SV=1	MJ1322	53.9	1e-06	COG0419	ATPase involved in DNA repair	K10352	7e-08	53.5	bta:317655	myosin heavy chain	-	-	-	--
CL4211.Contig1_sinensis	2000	15	124	1.3464	13.3416	3.30875270613963	Up	2.29696e-27	1.37835405891473e-25	gi|395508497|ref|XP_003758547.1|	445.7	4e-123	PREDICTED: acyl-CoA synthetase family member 3, mitochondrial [Sarcophilus harrisii]	--	--	--	--	sp|Q58DN7|ACSF3_BOVIN	437	5e-122	Acyl-CoA synthetase family member 3, mitochondrial OS=Bos taurus GN=ACSF3 PE=2 SV=1	SMa0150	197	6e-50	COG0318	Acyl-CoA synthetases (AMP-forming)/AMP-acid ligases II	K01896	2e-28	128	gga:426999	medium-chain acyl-CoA synthetase [EC:6.2.1.2]	GO:0019752//carboxylic acid metabolic process;GO:0006629//lipid metabolic process	GO:0016874//ligase activity	GO:0005739//mitochondrion	--
Unigene31847_sinensis	1138	4	33	0.6310	6.2400	3.30583411876706	Up	3.34158e-08	7.58568058064516e-07	gi|405959658|gb|EKC25670.1|	303.9	1e-80	hypothetical protein CGI_10017604 [Crassostrea gigas]	--	--	--	--	sp|Q3UHB8|CC177_MOUSE	105	2e-22	Coiled-coil domain-containing protein 177 OS=Mus musculus GN=Ccdc177 PE=1 SV=1	--	--	--	--	--	--	--	--	--	--	-	-	-	--
CL257.Contig1_sinensis	5156	4	33	0.1393	1.3773	3.30557567483227	Up	3.34158e-08	7.58320967491857e-07	gi|405968554|gb|EKC33617.1|	251.1	4e-64	hypothetical protein CGI_10016472 [Crassostrea gigas]	--	--	--	--	sp|Q9P1Z9|CI174_HUMAN	676	0.0	Uncharacterized protein C9orf174 OS=Homo sapiens GN=C9orf174 PE=2 SV=2	--	--	--	--	--	K10352	5e-16	88.6	dvi:Dvir_GJ22258	myosin heavy chain	-	-	-	--
Unigene26141_sinensis	723	33	272	8.1936	80.9554	3.30455794708218	Up	3.5795e-58	3.6727567820324e-56	gi|405962530|gb|EKC28196.1|	95.1	3e-18	Uncharacterized protein C2orf50 [Crassostrea gigas]	--	--	--	--	sp|Q96LR7|CB050_HUMAN	65.1	1e-10	Uncharacterized protein C2orf50 OS=Homo sapiens GN=C2orf50 PE=2 SV=1	--	--	--	--	--	K13696	2e-12	72.8	bfo:BRAFLDRAFT_117028	abhydrolase domain-containing protein 1/3	-	-	-	--
Unigene16725_sinensis	580	482	3970	149.1835	1472.9144	3.30351370453131	Up	0	0	gi|407408646|gb|EKF32003.1|	61.6	2e-08	hypothetical protein MOQ_004152 [Trypanosoma cruzi marinkellei]	--	--	--	--	sp|P08723|SPBP_RAT	67.0	3e-11	Prostatic spermine-binding protein OS=Rattus norvegicus GN=Sbp PE=1 SV=1	YOR054c	61.6	8e-10	COG0452	Phosphopantothenoylcysteine synthetase/decarboxylase	K11853	1e-09	63.2	phu:Phum_PHUM227220	ubiquitin carboxyl-terminal hydrolase 34 [EC:3.1.2.15]	-	-	-	--
Unigene27400_sinensis	1010	50	411	8.8869	87.5660	3.30061865157886	Up	5.69396e-87	8.19612601735537e-85	gi|405967433|gb|EKC32594.1|	244.2	7e-63	hypothetical protein CGI_10008200 [Crassostrea gigas]	--	--	--	--	sp|A7RR34|U740_NEMVE	118	2e-26	UPF0740 protein v1g200856 OS=Nematostella vectensis GN=v1g200856 PE=3 SV=1	--	--	--	--	--	K15601	6e-06	52.4	nvi:100120387	lysine-specific demethylase 3 [EC:1.14.11.-]	-	-	-	--
Unigene6058_sinensis	3290	150	1231	8.1846	80.5151	3.29827555943016	Up	8.96458e-257	3.67384308247059e-254	gi|405968122|gb|EKC33222.1|	166.0	1e-38	hypothetical protein CGI_10017400 [Crassostrea gigas]	--	--	--	--	sp|Q54J55|MYBX_DICDI	62.0	8e-09	Myb-like protein X OS=Dictyostelium discoideum GN=mybX PE=3 SV=1	--	--	--	--	--	K14437	3e-08	62.0	nvi:100119051	chromodomain-helicase-DNA-binding protein 7 [EC:3.6.4.12]	-	-	-	--
CL6172.Contig1_sinensis	873	5	41	1.0282	10.1061	3.2970335383131	Up	6.94718e-10	1.8745278211464e-08	gi|405971354|gb|EKC36195.1|	194.5	5e-48	Mitotic apparatus protein p62 [Crassostrea gigas]	gi|470236977|ref|XM_004350392.1|	73.8	1e-09	Dictyostelium fasciculatum transcription initiation factor TFIID subunit (taf11) mRNA, complete cds	sp|Q9NLA3|ANO39_ASTPE	159	1e-38	Nucleoplasmin-like protein ANO39 OS=Asterina pectinifera PE=1 SV=1	YOR054c	57.8	2e-08	COG0452	Phosphopantothenoylcysteine synthetase/decarboxylase	K11276	7e-26	118	hmg:100215712	nucleophosmin 1	GO:0044699	-	GO:0031981//nuclear lumen	--
CL6789.Contig4_sinensis	4627	5	41	0.1940	1.9068	3.29702497299519	Up	6.94718e-10	1.87380210383275e-08	gi|123448346|ref|XP_001312904.1|	117.1	9e-24	viral A-type inclusion protein [Trichomonas vaginalis G3]	--	--	--	--	sp|Q13439|GOGA4_HUMAN	229	6e-59	Golgin subfamily A member 4 OS=Homo sapiens GN=GOLGA4 PE=1 SV=1	YHR023w	147	1e-34	COG5022	Myosin heavy chain	K11499	1e-66	256	spu:592172	centromere protein F	-	-	-	--
Unigene33291_sinensis	3512	182	1490	9.3029	91.2949	3.29478184544442	Up	0	0	gi|390343535|ref|XP_798028.3|	75.5	2e-11	PREDICTED: fibrillin-2-like [Strongylocentrotus purpuratus]	--	--	--	--	sp|O94813|SLIT2_HUMAN	70.1	3e-11	Slit homolog 2 protein OS=Homo sapiens GN=SLIT2 PE=1 SV=1	--	--	--	--	--	K06850	2e-11	72.8	acs:100557859	slit 3	-	-	-	--
CL2452.Contig1_sinensis	2146	49	401	4.0989	40.2096	3.29423128607479	Up	9.59236e-85	1.36385740579592e-82	gi|66804691|ref|XP_636078.1|	59.7	7e-07	hypothetical protein DDB_G0289719 [Dictyostelium discoideum AX4] >gi|60464424|gb|EAL62571.1| hypothetical protein DDB_G0289719 [Dictyostelium discoideum AX4]	--	--	--	--	--	--	--	--	--	--	--	--	--	K13092	1e-06	56.2	dan:Dana_GF20935	nuclear protein NHN1	-	-	-	--
Unigene11469_sinensis	3072	11	90	0.6428	6.3043	3.29389435520769	Up	3.64496e-20	1.7216319880678e-18	gi|443734005|gb|ELU18154.1|	349.7	5e-94	hypothetical protein CAPTEDRAFT_184834 [Capitella teleta]	--	--	--	--	sp|Q08180|ICCR_DROME	265	5e-70	Irregular chiasm C-roughest protein OS=Drosophila melanogaster GN=rst PE=2 SV=2	--	--	--	--	--	K14319	3e-22	108	bfo:BRAFLDRAFT_126584	Ran GTPase-activating protein 1	GO:0032835//glomerulus development;GO:0007399//nervous system development;GO:0030154//cell differentiation	-	GO:0044464//cell part;GO:0016020//membrane	--
Unigene33498_sinensis	2457	134	1096	9.7904	95.9888	3.29342637219531	Up	1.652042e-228	5.87225071928571e-226	gi|405969553|gb|EKC34517.1|	897.9	0.0	Translin-associated factor X-interacting protein 1 [Crassostrea gigas]	gi|260798489|ref|XM_002594187.1|	89.7	6e-14	Branchiostoma floridae hypothetical protein, mRNA	sp|Q2TAA8|TXIP1_HUMAN	447	7e-125	Translin-associated factor X-interacting protein 1 OS=Homo sapiens GN=TSNAXIP1 PE=2 SV=1	Ta1488	59.3	3e-08	COG1340	Uncharacterized archaeal coiled-coil protein	K11499	4e-09	64.3	aml:100465502	centromere protein F	-	-	-	--
Unigene9508_sinensis	2296	12	98	0.9382	9.1848	3.29128090089367	Up	8.05784e-22	4.06503732773353e-20	gi|443725164|gb|ELU12845.1|	382.1	7e-104	hypothetical protein CAPTEDRAFT_219244 [Capitella teleta]	gi|470647167|ref|XM_004327257.1|	63.9	3e-06	PREDICTED: Tursiops truncatus dynein, axonemal, assembly factor 1 (DNAAF1), mRNA	sp|Q8NEP3|DAAF1_HUMAN	336	1e-91	Dynein assembly factor 1, axonemal OS=Homo sapiens GN=DNAAF1 PE=1 SV=5	SPAC4A8.12c	71.2	7e-12	COG4886	Leucine-rich repeat (LRR) protein	K11293	4e-14	80.9	cel:K10D2.1	protein HIRA/HIR1	-	-	-	--
CL4688.Contig2_sinensis	5106	120	980	4.2189	41.3010	3.2912379162299	Up	2.14624e-204	6.85900892477064e-202	gi|34334139|gb|AAQ64663.1|	144.8	4e-32	signal transducer and activator of transcription [Culex tritaeniorhynchus]	--	--	--	--	sp|Q61AP6|STAT1_CAEBR	118	1e-25	Signal transducer and activator of transcription 1 OS=Caenorhabditis briggsae GN=sta-1 PE=3 SV=2	--	--	--	--	--	K11224	1e-29	134	api:100161101	signal transducer and activator of transcription 5B	-	-	-	--
CL8121.Contig1_sinensis	1266	6	49	0.8508	8.3287	3.29119938912243	Up	1.470128e-11	4.56834735200714e-10	--	--	--	--	--	--	--	--	--	--	--	--	--	--	--	--	--	--	--	--	--	--	-	-	-	--
Unigene27378_sinensis	867	70	571	14.4937	141.7203	3.28954858151521	Up	8.6896e-120	1.60582425039788e-117	gi|260898759|tpg|DAA06552.1|	330.1	8e-89	TPA_inf: TEPP protein [Lottia gigantea]	--	--	--	--	sp|Q6URK8|TEPP_HUMAN	132	1e-30	Testis, prostate and placenta-expressed protein OS=Homo sapiens GN=TEPP PE=2 SV=3	--	--	--	--	--	--	--	--	--	--	-	-	-	--
CL1988.Contig1_sinensis	972	45	367	8.3109	81.2484	3.28926278054593	Up	1.360648e-77	1.80561877165714e-75	--	--	--	--	--	--	--	--	--	--	--	--	--	--	--	--	--	--	--	--	--	--	-	-	-	--
Unigene30056_sinensis	831	39	317	8.4249	82.0868	3.28441878018452	Up	3.73564e-67	4.36675005302013e-65	gi|405973079|gb|EKC37811.1|	307.0	7e-82	hypothetical protein CGI_10017632 [Crassostrea gigas]	gi|77993495|gb|AC163217.9|	69.9	2e-08	Mus musculus chromosome 1, clone RP23-474A1, complete sequence	sp|Q5TCS8|AKD1_HUMAN	180	3e-45	Adenylate kinase domain-containing protein 1 OS=Homo sapiens GN=AKD1 PE=2 SV=2	AF0676	79.7	5e-15	COG0563	Adenylate kinase and related kinases	K00939	1e-15	84.3	cfa:478145	adenylate kinase [EC:2.7.4.3]	-	GO:0003824//catalytic activity	-	--
Unigene16749_sinensis	1664	208	1688	22.4394	218.2901	3.28214069618724	Up	0	0	gi|156395832|ref|XP_001637314.1|	157.9	1e-36	predicted protein [Nematostella vectensis] >gi|156224425|gb|EDO45251.1| predicted protein [Nematostella vectensis]	--	--	--	--	sp|Q9DAN9|CQ105_MOUSE	105	2e-22	Uncharacterized protein C17orf105 homolog OS=Mus musculus PE=2 SV=1	--	--	--	--	--	K10590	2e-33	144	bfo:BRAFLDRAFT_79014	E3 ubiquitin-protein ligase TRIP12 [EC:6.3.2.19]	GO:0019538//protein metabolic process	-	-	--
Unigene25853_sinensis	785	74	598	16.9225	163.9255	3.27602567334314	Up	6.87936e-125	1.30950309245902e-122	gi|291242911|ref|XP_002741377.1|	80.9	7e-14	PREDICTED: hypothetical protein [Saccoglossus kowalevskii]	--	--	--	--	--	--	--	--	--	--	--	--	--	--	--	--	--	--	-	-	-	--
Unigene8897_sinensis	3559	113	913	5.6997	55.2024	3.27577310043741	Up	1.038136e-189	3.10411575038627e-187	gi|198463339|ref|XP_002135479.1|	75.1	3e-11	GA28568 [Drosophila pseudoobscura pseudoobscura] >gi|198151215|gb|EDY74106.1| GA28568 [Drosophila pseudoobscura pseudoobscura]	--	--	--	--	sp|Q80TZ9|RERE_MOUSE	67.8	2e-10	Arginine-glutamic acid dipeptide repeats protein OS=Mus musculus GN=Rere PE=1 SV=3	--	--	--	--	--	K05628	1e-11	73.6	cfa:479596	arginine-glutamic acid dipeptide (RE) repeats	GO:0009653//anatomical structure morphogenesis;GO:0048518;GO:0030154//cell differentiation;GO:0007049//cell cycle;GO:0044767;GO:0048731;GO:0048477//oogenesis;GO:0006355//regulation of transcription, DNA-dependent	GO:0005488//binding	-	--
Unigene29300_sinensis	3269	610	4925	33.4978	324.1950	3.27472358718616	Up	0	0	gi|405959610|gb|EKC25625.1|	941.4	0.0	Coiled-coil domain-containing protein 81 [Crassostrea gigas]	gi|291224927|ref|XM_002732408.1|	69.9	8e-08	PREDICTED: Saccoglossus kowalevskii predicted protein-like (LOC100373351), mRNA	sp|Q9D5W4|CCD81_MOUSE	267	1e-70	Coiled-coil domain-containing protein 81 OS=Mus musculus GN=Ccdc81 PE=2 SV=1	--	--	--	--	--	K06084	2e-10	68.9	spu:591791	F-box protein 20	-	-	-	--
Unigene29941_sinensis	2310	85	686	6.6055	63.9039	3.27416430550188	Up	6.26984e-143	1.38232114860759e-140	gi|405970316|gb|EKC35231.1|	350.5	2e-94	hypothetical protein CGI_10019831 [Crassostrea gigas]	--	--	--	--	sp|Q96M20|CNBD2_HUMAN	100	2e-20	Cyclic nucleotide-binding domain-containing protein 2 OS=Homo sapiens GN=CNBD2 PE=2 SV=2	--	--	--	--	--	K04351	5e-10	67.4	mgp:100551109	Rap guanine nucleotide exchange factor (GEF) 4	-	-	-	--
Unigene5870_sinensis	1746	143	1150	14.7026	141.7322	3.26902435180789	Up	5.25158e-238	1.99930233344262e-235	gi|405952678|gb|EKC20461.1|	153.7	3e-35	hypothetical protein CGI_10006043 [Crassostrea gigas]	--	--	--	--	--	--	--	--	--	--	--	--	--	--	--	--	--	--	-	-	-	--
Unigene20662_sinensis	743	127	1021	30.6843	295.7004	3.26856361821725	Up	1.716052e-211	5.77563414434782e-209	--	--	--	--	--	--	--	--	--	--	--	--	--	--	--	--	--	--	--	--	--	--	-	-	-	--
Unigene28598_sinensis	2018	6	48	0.5337	5.1184	3.26159198112736	Up	2.89208e-11	8.78327469572799e-10	gi|270016221|gb|EFA12667.1|	62.0	1e-52	hypothetical protein TcasGA2_TC010690 [Tribolium castaneum]	--	--	--	--	--	--	--	--	--	--	--	--	--	K10592	6e-15	83.6	xtr:100489531	E3 ubiquitin-protein ligase HUWE1 [EC:6.3.2.19]	-	-	-	--
Unigene31100_sinensis	1024	4	32	0.7012	6.7246	3.26155055304963	Up	6.59298e-08	1.43899224191729e-06	--	--	--	--	--	--	--	--	--	--	--	--	--	--	--	--	--	--	--	--	--	--	-	-	-	--
Unigene33346_sinensis	1923	6	48	0.5601	5.3713	3.2615149683274	Up	2.89208e-11	8.77180328776665e-10	gi|308506969|ref|XP_003115667.1|	64.7	2e-08	hypothetical protein CRE_18753 [Caenorhabditis remanei] >gi|308256202|gb|EFP00155.1| hypothetical protein CRE_18753 [Caenorhabditis remanei]	--	--	--	--	sp|Q14789|GOGB1_HUMAN	58.5	5e-08	Golgin subfamily B member 1 OS=Homo sapiens GN=GOLGB1 PE=1 SV=2	--	--	--	--	--	K10352	5e-07	57.0	isc:IscW_ISCW001340	myosin heavy chain	-	-	-	--
CL2818.Contig2_sinensis	1206	4	32	0.5954	5.7098	3.26150908578893	Up	6.59298e-08	1.4403459505174e-06	gi|405958292|gb|EKC24434.1|	79.7	3e-13	hypothetical protein CGI_10016400 [Crassostrea gigas]	--	--	--	--	--	--	--	--	--	--	--	--	--	--	--	--	--	--	-	-	-	--
CL7296.Contig1_sinensis	1655	3	24	0.3254	3.1205	3.26149105556904	Up	3.26704e-06	5.65915986474391e-05	gi|291222266|ref|XP_002731138.1|	55.8	7e-06	PREDICTED: predicted protein-like [Saccoglossus kowalevskii]	--	--	--	--	--	--	--	--	--	--	--	--	--	--	--	--	--	--	-	-	-	--
CL8580.Contig1_sinensis	2292	368	2944	28.8227	276.4001	3.26148074459088	Up	0	0	gi|405967050|gb|EKC32264.1|	776.2	0.0	Tektin-4 [Crassostrea gigas]	gi|211998645|gb|EU827257.1|	81.8	1e-11	Haliotis asinina tektin A1 mRNA, complete cds	sp|Q5PPV2|TEKT4_XENLA	469	2e-131	Tektin-4 OS=Xenopus laevis GN=tekt4 PE=2 SV=1	Ta0787	50.8	1e-05	COG1196	Chromosome segregation ATPases	K04688	7e-27	123	cqu:CpipJ_CPIJ003064	p70 ribosomal S6 kinase [EC:2.7.11.1]	GO:0000226//microtubule cytoskeleton organization	-	GO:0005737//cytoplasm;GO:0005929//cilium;GO:0005874//microtubule	--
Unigene16704_sinensis	790	153	1224	34.7669	333.4029	3.26148031358574	Up	1.201736e-252	4.75703098772727e-250	--	--	--	--	--	--	--	--	--	--	--	--	--	--	--	--	--	--	--	--	--	--	-	-	-	--
Unigene31211_sinensis	713	8	64	2.0142	19.3155	3.26148017559799	Up	1.33826e-14	4.88654276415094e-13	--	--	--	--	gi|53828844|gb|AC102475.7|	69.9	2e-08	Mus musculus chromosome 8, clone RP24-393D2, complete sequence	--	--	--	--	--	--	--	--	--	--	--	--	--	--	-	-	-	--
Unigene33909_sinensis	2803	429	3432	27.4749	263.4749	3.26147939437681	Up	0	0	gi|443694026|gb|ELT95261.1|	1137.9	0.0	hypothetical protein CAPTEDRAFT_163682 [Capitella teleta]	gi|459415287|gb|GAGF01026985.1|	101	2e-17	TSA: Chrysopa pallens Unigene30268_dacaoling transcribed RNA sequence	sp|P79334|PYGM_BOVIN	1113	0.0	Glycogen phosphorylase, muscle form OS=Bos taurus GN=PYGM PE=1 SV=3	slr1367	872	0.0	COG0058	Glucan phosphorylase	K00688	0.0	1123	nvi:100117812	starch phosphorylase [EC:2.4.1.1]	GO:0005980//glycogen catabolic process	GO:0008184//glycogen phosphorylase activity;GO:0030170//pyridoxal phosphate binding;GO:0000166//nucleotide binding	-	--
Unigene30129_sinensis	1336	87	696	11.6900	112.1031	3.26147933872571	Up	1.84497e-144	4.13302941897106e-142	gi|405951840|gb|EKC19717.1|	88.6	8e-16	40S ribosomal protein S19 [Crassostrea gigas]	--	--	--	--	--	--	--	--	--	--	--	--	--	--	--	--	--	--	-	-	-	--
Unigene27180_sinensis	1115	6	48	0.9660	9.2636	3.2614778652766	Up	2.89208e-11	8.77944756078431e-10	--	--	--	--	--	--	--	--	--	--	--	--	--	--	--	--	--	--	--	--	--	--	-	-	-	--
Unigene28800_sinensis	1014	59	472	10.4452	100.1657	3.26147654544176	Up	1.567752e-98	2.42181184230599e-96	--	--	--	--	--	--	--	--	--	--	--	--	--	--	--	--	--	--	--	--	--	--	-	-	-	--
Unigene20638_sinensis	809	3	24	0.6657	6.3838	3.26147138027049	Up	3.26704e-06	5.66197536716418e-05	--	--	--	--	--	--	--	--	--	--	--	--	--	--	--	--	--	--	--	--	--	--	-	-	-	--
CL1047.Contig5_sinensis	254	3	24	2.1203	20.3326	3.26145439897548	Up	3.26704e-06	5.66056726585426e-05	--	--	--	--	--	--	--	--	--	--	--	--	--	--	--	--	--	--	--	--	--	--	-	-	-	--
CL8830.Contig2_sinensis	2044	11	88	0.9661	9.2644	3.2614531107576	Up	1.404214e-19	6.46597390389954e-18	gi|405959946|gb|EKC25918.1|	174.1	2e-119	Uncharacterized protein C10orf67 [Crassostrea gigas]	--	--	--	--	sp|Q8IYJ2|CJ067_HUMAN	84.0	1e-15	Uncharacterized protein C10orf67 OS=Homo sapiens GN=C10orf67 PE=2 SV=2	MK0690	75.9	3e-13	COG0419	ATPase involved in DNA repair	K11423	3e-13	77.8	dgr:Dgri_GH16034	histone-lysine N-methyltransferase SETD2 [EC:2.1.1.43]	-	-	-	--
Unigene29390_sinensis	1413	4	32	0.5082	4.8733	3.26143075696377	Up	6.59298e-08	1.43989443141066e-06	gi|402889911|ref|XP_003908241.1|	56.2	4e-06	PREDICTED: sushi, nidogen and EGF-like domain-containing protein 1 [Papio anubis]	--	--	--	--	sp|Q8TER0|SNED1_HUMAN	116	1e-25	Sushi, nidogen and EGF-like domain-containing protein 1 OS=Homo sapiens GN=SNED1 PE=2 SV=2	--	--	--	--	--	K02599	4e-21	103	bmy:Bm1_32035	Notch	-	-	-	--
Unigene27854_sinensis	1365	5	40	0.6576	6.3058	3.26139720889823	Up	1.368306e-09	3.59052771050847e-08	--	--	--	--	--	--	--	--	--	--	--	--	--	--	--	--	--	--	--	--	--	--	-	-	-	--
CL6130.Contig3_sinensis	2522	6	48	0.4271	4.0955	3.26139379126095	Up	2.89208e-11	8.77562375958188e-10	gi|405951312|gb|EKC19236.1|	419.9	3e-115	UPF0638 protein B [Crassostrea gigas]	--	--	--	--	sp|Q497Q6|F228B_MOUSE	121	9e-27	Protein FAM228B OS=Mus musculus GN=Fam228b PE=2 SV=1	--	--	--	--	--	--	--	--	--	--	-	-	-	--
Unigene28285_sinensis	1162	4	32	0.6180	5.9260	3.26137988305691	Up	6.59298e-08	1.44079775288582e-06	--	--	--	--	--	--	--	--	--	--	--	--	--	--	--	--	--	--	--	--	--	--	-	-	-	--
CL6107.Contig2_sinensis	1484	4	32	0.4839	4.6401	3.26137505325599	Up	6.59298e-08	1.43944319529928e-06	gi|405958331|gb|EKC24467.1|	281.2	1e-73	Spermatogenesis-associated protein 7 [Crassostrea gigas]	--	--	--	--	sp|Q9P0W8|SPAT7_HUMAN	90.5	9e-18	Spermatogenesis-associated protein 7 OS=Homo sapiens GN=SPATA7 PE=2 SV=3	--	--	--	--	--	--	--	--	--	--	-	-	-	--
Unigene537_sinensis	1838	63	503	6.1531	58.8894	3.25862263009127	Up	8.37494e-105	1.37287928202353e-102	gi|405962628|gb|EKC28286.1|	446.0	3e-123	hypothetical protein CGI_10016314 [Crassostrea gigas]	--	--	--	--	sp|Q5T5N4|CF118_HUMAN	105	3e-22	Uncharacterized protein C6orf118 OS=Homo sapiens GN=C6orf118 PE=2 SV=1	--	--	--	--	--	--	--	--	--	--	-	-	-	--
Unigene33900_sinensis	1099	173	1381	28.2586	270.4027	3.25834765923475	Up	1.512504e-284	7.0249760784e-282	gi|405962687|gb|EKC28338.1|	395.6	2e-108	Protein FAM78B [Crassostrea gigas]	--	--	--	--	sp|Q8C552|FA78A_MOUSE	254	2e-67	Protein FAM78A OS=Mus musculus GN=Fam78a PE=2 SV=1	--	--	--	--	--	--	--	--	--	--	-	-	-	--
Unigene35114_sinensis	2591	191	1524	13.2333	126.5705	3.25769641481544	Up	0	0	gi|405964240|gb|EKC29746.1|	396.0	5e-108	hypothetical protein CGI_10009342 [Crassostrea gigas]	--	--	--	--	--	--	--	--	--	--	--	--	--	--	--	--	--	--	-	-	-	--
CL2282.Contig2_sinensis	1566	30	239	3.4390	32.8414	3.25545460827011	Up	1.303708e-50	1.23743913694823e-48	gi|405964735|gb|EKC30184.1|	679.1	0.0	Uncharacterized protein C11orf66-like protein [Crassostrea gigas]	--	--	--	--	sp|Q66HR9|PPR32_RAT	240	7e-63	Protein phosphatase 1 regulatory subunit 32 OS=Rattus norvegicus GN=Ppp1r32 PE=2 SV=1	--	--	--	--	--	--	--	--	--	--	-	-	-	--
Unigene26643_sinensis	841	88	700	18.7840	179.1088	3.25326000309771	Up	6.17152e-145	1.38697944154839e-142	gi|405960968|gb|EKC26834.1|	276.6	1e-72	hypothetical protein CGI_10007397 [Crassostrea gigas]	--	--	--	--	sp|Q4KKZ1|CA158_MOUSE	122	1e-27	Uncharacterized protein C1orf158 homolog OS=Mus musculus PE=2 SV=2	--	--	--	--	--	--	--	--	--	--	-	-	-	--
CL1733.Contig1_sinensis	1168	201	1593	30.8926	293.4864	3.24796044909958	Up	0	0	gi|440896894|gb|ELR48697.1|	116.3	3e-24	hypothetical protein M91_21220 [Bos grunniens mutus]	--	--	--	--	sp|Q8NHV1|GIMA7_HUMAN	105	3e-22	GTPase IMAP family member 7 OS=Homo sapiens GN=GIMAP7 PE=2 SV=1	--	--	--	--	--	K05305	2e-09	64.3	dre:100150934	fucokinase [EC:2.7.1.52]	-	-	-	--
CL3729.Contig1_sinensis	1762	26	206	2.6489	25.1580	3.24755195009987	Up	9.69578e-44	8.24780582197802e-42	gi|405967772|gb|EKC32902.1|	561.2	6e-158	Protein FAM47E [Crassostrea gigas]	gi|459173860|ref|XM_002127232.2|	61.9	1e-05	PREDICTED: Ciona intestinalis protein FAM47E-like (LOC100181941), mRNA	sp|Q6ZV65|FA47E_HUMAN	150	1e-35	Protein FAM47E OS=Homo sapiens GN=FAM47E PE=2 SV=3	--	--	--	--	--	K12327	1e-07	58.9	acs:100565307	caldesmon	-	-	-	--
CL9434.Contig2_sinensis	1646	12	95	1.3087	12.4196	3.24641238527499	Up	6.07678e-21	2.96888629607293e-19	gi|405977488|gb|EKC41935.1|	87.8	1e-15	Organic cation transporter-like protein [Crassostrea gigas]	--	--	--	--	sp|O57379|S22A6_PSEAM	61.2	6e-09	Solute carrier family 22 member 6 OS=Pseudopleuronectes americanus GN=SLC22A6 PE=1 SV=1	--	--	--	--	--	K08202	2e-09	64.7	bfo:BRAFLDRAFT_244629	MFS transporter, OCT family, solute carrier family 22 (organic cation transporter), member 4/5	-	-	-	--
Unigene437_sinensis	922	12	95	2.3364	22.1721	3.24638622455134	Up	6.07678e-21	2.96680578710582e-19	gi|196000556|ref|XP_002110146.1|	119.8	1e-25	hypothetical protein TRIADDRAFT_53828 [Trichoplax adhaerens] >gi|190588270|gb|EDV28312.1| hypothetical protein TRIADDRAFT_53828 [Trichoplax adhaerens]	--	--	--	--	sp|P06144|H1_LYTPI	117	4e-26	Late histone H1 OS=Lytechinus pictus PE=3 SV=1	MT3064	49.3	9e-06	COG0776	Bacterial nucleoid DNA-binding protein	K11275	2e-26	119	tad:TRIADDRAFT_53828	histone H1/5	-	-	-	--
Unigene24806_sinensis	2422	111	878	8.2272	78.0073	3.24513571871908	Up	6.70016e-181	1.87467247807229e-178	gi|261289807|ref|XP_002611765.1|	396.7	3e-108	hypothetical protein BRAFLDRAFT_99083 [Branchiostoma floridae] >gi|229297137|gb|EEN67775.1| hypothetical protein BRAFLDRAFT_99083 [Branchiostoma floridae]	gi|390369309|ref|XM_786095.3|	155	1e-33	PREDICTED: Strongylocentrotus purpuratus parkin coregulated gene protein homolog (LOC586307), mRNA	sp|Q9DAK2|PACRG_MOUSE	369	2e-101	Parkin coregulated gene protein homolog OS=Mus musculus GN=Pacrg PE=1 SV=1	--	--	--	--	--	K15173	1e-81	305	tca:657918	transcription termination factor 2 [EC:3.6.4.-]	GO:0007286//spermatid development	-	GO:0097225//sperm midpiece;GO:0044297//cell body;GO:0005739//mitochondrion	--
CL1350.Contig1_sinensis	1027	11	87	1.9228	18.2290	3.24495480699513	Up	2.75126e-19	1.25197604794252e-17	--	--	--	--	--	--	--	--	--	--	--	--	--	--	--	--	--	--	--	--	--	--	-	-	-	--
Unigene34056_sinensis	3010	59	466	3.5187	33.3146	3.24304014958184	Up	8.73138e-97	1.33693739169231e-94	gi|405959786|gb|EKC25779.1|	1070.5	0.0	WD repeat-containing protein 78 [Crassostrea gigas]	--	--	--	--	sp|E9PYY5|WDR78_MOUSE	621	3e-177	WD repeat-containing protein 78 OS=Mus musculus GN=Wdr78 PE=2 SV=1	--	--	--	--	--	K10409	4e-70	267	xla:444304	dynein intermediate chain 1, axonemal	-	-	-	--
CL1283.Contig2_sinensis	5456	29	228	0.9542	8.9924	3.23634261952227	Up	4.29422e-48	3.93132737424441e-46	gi|405970416|gb|EKC35324.1|	58.9	3e-06	Titin [Crassostrea gigas]	--	--	--	--	sp|O01761|UNC89_CAEEL	233	5e-60	Muscle M-line assembly protein unc-89 OS=Caenorhabditis elegans GN=unc-89 PE=1 SV=3	SPAC140.02	60.1	4e-08	COG0724	RNA-binding proteins (RRM domain)	K12567	9e-45	184	gga:424126	titin [EC:2.7.11.1]	GO:0009653//anatomical structure morphogenesis;GO:0006996//organelle organization;GO:0061061//muscle structure development	GO:0005488//binding	GO:0044422;GO:0043232	--
Unigene31171_sinensis	1589	207	1626	23.3856	220.1971	3.23510311940292	Up	0	0	gi|405951086|gb|EKC19029.1|	590.9	6e-167	Serine/threonine-protein kinase NIM1 [Crassostrea gigas]	gi|344272484|ref|XM_003408014.1|	97.6	2e-16	PREDICTED: Loxodonta africana serine/threonine-protein kinase NIM1-like (LOC100661245), mRNA	sp|Q8IY84|NIM1_HUMAN	509	5e-144	Serine/threonine-protein kinase NIM1 OS=Homo sapiens GN=NIM1 PE=1 SV=1	SPAC14C4.03	130	6e-30	COG0515	Serine/threonine protein kinase	K08798	4e-69	263	dre:334300	MAP/microtubule affinity-regulating kinase [EC:2.7.11.1]	GO:0006468//protein phosphorylation	GO:0005524//ATP binding;GO:0000287//magnesium ion binding;GO:0004674//protein serine/threonine kinase activity	-	--
CL2831.Contig3_sinensis	3121	16	125	0.9203	8.6185	3.22726066481659	Up	5.69272e-27	3.37537114621277e-25	gi|405973079|gb|EKC37811.1|	74.7	3e-11	hypothetical protein CGI_10017632 [Crassostrea gigas]	gi|350590805|ref|XM_003131924.3|	101	2e-17	PREDICTED: Sus scrofa proline-, glutamic acid- and leucine-rich protein 1-like (LOC100516108), mRNA	sp|Q5TCS8|AKD1_HUMAN	754	0.0	Adenylate kinase domain-containing protein 1 OS=Homo sapiens GN=AKD1 PE=2 SV=2	YMR227c	70.5	2e-11	COG5414	TATA-binding protein-associated factor	K04574	3e-25	118	xtr:100101753	neurofilament heavy polypeptide	-	-	-	--
Unigene29078_sinensis	663	92	718	24.9101	233.0376	3.22576003037719	Up	1.985104e-147	4.53443313363934e-145	gi|405962196|gb|EKC27897.1|	88.2	3e-16	ADAM family mig-17 [Crassostrea gigas]	--	--	--	--	--	--	--	--	--	--	--	--	--	--	--	--	--	--	-	-	-	--
Unigene28072_sinensis	686	5	39	1.3084	12.2336	3.22497344075187	Up	2.68836e-09	6.8556132079063e-08	--	--	--	--	--	--	--	--	--	--	--	--	--	--	--	--	--	--	--	--	--	--	-	-	-	--
CL1598.Contig2_sinensis	2039	95	741	8.3639	78.2017	3.22495225205506	Up	4.66734e-152	1.09484481636364e-149	gi|405971402|gb|EKC36241.1|	647.1	0.0	Coiled-coil domain-containing protein 96 [Crassostrea gigas]	gi|291226618|ref|XM_002733244.1|	85.7	8e-13	PREDICTED: Saccoglossus kowalevskii coiled-coil domain containing 96-like (LOC100374161), mRNA	sp|Q9CR92|CCD96_MOUSE	367	7e-101	Coiled-coil domain-containing protein 96 OS=Mus musculus GN=Ccdc96 PE=2 SV=1	YLR106c	67.8	7e-11	COG5271	AAA ATPase containing von Willebrand factor type A (vWA) domain	K13749	1e-26	122	rno:56814	solute carrier family 24 (sodium/potassium/calcium exchanger), member 1	-	-	-	--
CL5263.Contig2_sinensis	2093	10	78	0.8577	8.0194	3.2249492745425	Up	2.44758e-17	1.02230486223022e-15	gi|390357845|ref|XP_789321.3|	384.4	1e-104	PREDICTED: coiled-coil domain-containing protein 83-like [Strongylocentrotus purpuratus]	--	--	--	--	sp|Q95K40|CCD83_MACFA	230	1e-59	Coiled-coil domain-containing protein 83 OS=Macaca fascicularis GN=CCDC83 PE=2 SV=1	MJ1322	53.9	1e-06	COG0419	ATPase involved in DNA repair	K03163	2e-07	58.9	ame:412750	DNA topoisomerase I [EC:5.99.1.2]	-	-	-	--
Unigene36916_sinensis	680	5	39	1.3200	12.3416	3.22491960698958	Up	2.68836e-09	6.85812350201392e-08	--	--	--	--	--	--	--	--	--	--	--	--	--	--	--	--	--	--	--	--	--	--	-	-	-	--
CL700.Contig1_sinensis	1862	23	179	2.2174	20.6866	3.22175559813875	Up	6.26996e-38	4.73263102101842e-36	gi|405964854|gb|EKC30296.1|	443.4	2e-122	Coiled-coil domain-containing protein 74A [Crassostrea gigas]	gi|195396024|ref|XM_002056597.1|	71.9	1e-08	Drosophila virilis GJ10114 (Dvir\GJ10114), mRNA	sp|Q96AQ1|CC74A_HUMAN	94.7	6e-19	Coiled-coil domain-containing protein 74A OS=Homo sapiens GN=CCDC74A PE=2 SV=1	PH1798	52.0	4e-06	COG1196	Chromosome segregation ATPases	K08286	1e-07	58.9	dre:567039	protein-serine/threonine kinase [EC:2.7.11.-]	-	-	-	--
Unigene36996_sinensis	3036	96	747	5.6764	52.9461	3.22147625870997	Up	4.06772e-153	9.63925117959183e-151	gi|405953593|gb|EKC21226.1|	101.7	2e-19	Double-stranded RNA-specific editase 1 [Crassostrea gigas]	--	--	--	--	sp|Q869E1|DNLI1_DICDI	85.1	8e-16	DNA ligase 1 OS=Dictyostelium discoideum GN=lig1 PE=3 SV=1	SPAC140.02	64.3	1e-09	COG0724	RNA-binding proteins (RRM domain)	K00907	1e-12	76.6	dme:Dmel_CG18255	myosin-light-chain kinase [EC:2.7.11.18]	-	-	-	--
Unigene9575_sinensis	2515	318	2474	22.6982	211.6785	3.22122494414661	Up	0	0	gi|405959162|gb|EKC25224.1|	644.4	0.0	cAMP and cAMP-inhibited cGMP 3&apos;,5&apos;-cyclic phosphodiesterase 10A [Crassostrea gigas]	--	--	--	--	sp|Q9Y233|PDE10_HUMAN	575	2e-163	cAMP and cAMP-inhibited cGMP 3',5'-cyclic phosphodiesterase 10A OS=Homo sapiens GN=PDE10A PE=1 SV=1	--	--	--	--	--	K01120	2e-165	583	dre:394077	3',5'-cyclic-nucleotide phosphodiesterase [EC:3.1.4.17]	GO:0009987//cellular process;GO:0050896//response to stimulus;GO:0044699;GO:0065007//biological regulation	GO:0004118//cGMP-stimulated cyclic-nucleotide phosphodiesterase activity;GO:0030552//cAMP binding	-	--
Unigene32589_sinensis	1474	72	560	8.7687	81.7533	3.22084208918839	Up	3.2789e-115	5.87243403856041e-113	gi|123976198|ref|XP_001330808.1|	63.2	4e-08	viral A-type inclusion protein [Trichomonas vaginalis G3]	--	--	--	--	sp|Q8BL66|EEA1_MOUSE	50.4	1e-05	Early endosome antigen 1 OS=Mus musculus GN=Eea1 PE=1 SV=2	FN1129	52.0	3e-06	COG1196	Chromosome segregation ATPases	--	--	--	--	--	-	-	-	--
Unigene2510_sinensis	1066	22	171	3.7048	34.5187	3.21991056530129	Up	2.78054e-36	2.05863380722635e-34	gi|71980419|ref|NP_001020958.1|	56.6	2e-06	Protein XNP-1 [Caenorhabditis elegans] >gi|373218541|emb|CCD61253.1| Protein XNP-1 [Caenorhabditis elegans]	--	--	--	--	sp|Q9U7E0|ATRX_CAEEL	76.6	8e-14	Transcriptional regulator ATRX homolog OS=Caenorhabditis elegans GN=xnp-1 PE=1 SV=1	SPAC140.02	49.7	9e-06	COG0724	RNA-binding proteins (RRM domain)	K10429	3e-10	66.6	mmu:17755	microtubule-associated protein 1	GO:0048856//anatomical structure development;GO:0007275//multicellular organismal development;GO:0044767	-	-	--
Unigene8466_sinensis	2035	92	715	8.1157	75.6061	3.21971519627264	Up	1.470348e-146	3.31513510718447e-144	--	--	--	--	--	--	--	--	--	--	--	--	--	--	--	--	--	--	--	--	--	--	-	-	-	--
Unigene30956_sinensis	4870	352	2731	12.9752	120.6723	3.21726586575449	Up	0	0	gi|291241659|ref|XP_002740730.1|	196.1	1e-47	PREDICTED: hypothetical protein [Saccoglossus kowalevskii]	--	--	--	--	sp|Q8VIM6|STRC_MOUSE	99.0	9e-20	Stereocilin OS=Mus musculus GN=Strc PE=2 SV=2	--	--	--	--	--	--	--	--	--	--	-	GO:0003824//catalytic activity	-	--
CL239.Contig2_sinensis	2841	4	31	0.2527	2.3480	3.21593483905264	Up	1.2969e-07	2.73054475974615e-06	gi|405967711|gb|EKC32844.1|	195.3	1e-47	Adenylate cyclase type 10 [Crassostrea gigas]	--	--	--	--	sp|Q96PN6|ADCYA_HUMAN	79.3	4e-14	Adenylate cyclase type 10 OS=Homo sapiens GN=ADCY10 PE=1 SV=3	--	--	--	--	--	K11265	8e-23	110	spu:574069	adenylate cyclase 10 [EC:4.6.1.1]	-	-	GO:0044424//intracellular part	--
Unigene30319_sinensis	1291	4	31	0.5562	5.1671	3.2156791550238	Up	1.2969e-07	2.72807144021739e-06	gi|405975907|gb|EKC40438.1|	109.4	4e-22	hypothetical protein CGI_10021321 [Crassostrea gigas]	--	--	--	--	--	--	--	--	--	--	--	--	--	--	--	--	--	--	-	-	-	--
Unigene28139_sinensis	450	4	31	1.5957	14.8240	3.21567343857363	Up	1.2969e-07	2.72971982175227e-06	--	--	--	--	--	--	--	--	--	--	--	--	--	--	--	--	--	--	--	--	--	--	-	-	-	--
Unigene35049_sinensis	1421	16	124	2.0213	18.7777	3.21566499772102	Up	1.111648e-26	6.53013528768971e-25	gi|405963699|gb|EKC29255.1|	134.8	1e-29	hypothetical protein CGI_10027470 [Crassostrea gigas]	--	--	--	--	sp|Q75JC9|Y8484_DICDI	54.7	5e-07	Uncharacterized protein DDB_G0271670 OS=Dictyostelium discoideum GN=DDB_G0271670 PE=4 SV=1	--	--	--	--	--	--	--	--	--	--	-	-	-	--
Unigene9085_sinensis	1444	4	31	0.4973	4.6197	3.21561083085012	Up	1.2969e-07	2.7288953820598e-06	gi|405964506|gb|EKC29982.1|	333.6	1e-89	Serine/threonine-protein kinase Nek10 [Crassostrea gigas]	--	--	--	--	sp|Q6ZWH5|NEK10_HUMAN	164	4e-40	Serine/threonine-protein kinase Nek10 OS=Homo sapiens GN=NEK10 PE=2 SV=3	--	--	--	--	--	K00924	3e-07	57.4	cel:D1044.8	[EC:2.7.1.-]	-	-	-	--
Unigene3134_sinensis	909	87	673	17.1813	159.3185	3.21300269645457	Up	8.80612e-138	1.85913204327273e-135	--	--	--	--	--	--	--	--	--	--	--	--	--	--	--	--	--	--	--	--	--	--	-	-	-	--
CL9784.Contig1_sinensis	3364	24	185	1.2807	11.8340	3.20793332666858	Up	5.38346e-39	4.15349141461794e-37	gi|405951131|gb|EKC19070.1|	512.7	5e-143	Monocarboxylate transporter 10 [Crassostrea gigas]	--	--	--	--	sp|Q3U9N9|MOT10_MOUSE	223	2e-57	Monocarboxylate transporter 10 OS=Mus musculus GN=Slc16a10 PE=1 SV=1	AF0367	110	2e-23	COG0477	Permeases of the major facilitator superfamily	K08187	2e-73	278	nve:NEMVE_v1g88648	MFS transporter, MCP family, solute carrier family 16 (monocarboxylic acid transporters), member 10	-	-	-	--
Unigene31155_sinensis	4117	299	2304	13.0374	120.4250	3.20740683184342	Up	0	0	gi|291241659|ref|XP_002740730.1|	171.8	2e-40	PREDICTED: hypothetical protein [Saccoglossus kowalevskii]	--	--	--	--	sp|Q8VIM6|STRC_MOUSE	102	5e-21	Stereocilin OS=Mus musculus GN=Strc PE=2 SV=2	--	--	--	--	--	--	--	--	--	--	-	-	-	--
Unigene4831_sinensis	3461	70	539	3.6308	33.5121	3.20632272669754	Up	1.755012e-110	3.03399332575682e-108	gi|405974861|gb|EKC39473.1|	320.5	4e-85	Kyphoscoliosis peptidase [Crassostrea gigas]	--	--	--	--	sp|Q8C8H8|KY_MOUSE	87.8	1e-16	Kyphoscoliosis peptidase OS=Mus musculus GN=Ky PE=1 SV=1	--	--	--	--	--	K14786	7e-11	70.9	smm:Smp_133510	protein KRI1	-	-	-	--
Unigene29868_sinensis	1315	794	6111	108.3918	1000.0035	3.20567752550505	Up	0	0	gi|347450694|gb|AEO94538.1|	507.7	5e-142	arginine kinase [Hyriopsis schlegelii]	gi|392879313|gb|JX210175.1|	67.9	1e-07	Callorhinchus milii clone P06C19.Spleen.s2 brain creatine kinase mRNA, complete cds	sp|O15990|KARG_LIOJA	481	1e-135	Arginine kinase OS=Liolophura japonica PE=2 SV=1	BH0102	110	4e-24	COG3869	Arginine kinase	K00933	3e-100	366	aag:AaeL_AAEL009185	creatine kinase [EC:2.7.3.2]	-	GO:0016772//transferase activity, transferring phosphorus-containing groups;GO:0000166//nucleotide binding	-	--
Unigene31372_sinensis	1444	81	623	10.0698	92.8402	3.20471460086335	Up	2.30076e-127	4.54083989915014e-125	gi|405977295|gb|EKC41754.1|	597.0	8e-169	IQ domain-containing protein G [Crassostrea gigas]	gi|163637099|gb|EU152948.1|	141	1e-29	Crassostrea gigas clone 169 IQ motif containing G protein mRNA, partial cds	sp|Q2T9V2|IQCG_BOVIN	325	1e-88	IQ domain-containing protein G OS=Bos taurus GN=IQCG PE=2 SV=1	aq_1006	59.7	1e-08	COG0419	ATPase involved in DNA repair	K10352	6e-10	66.2	acs:100555799	myosin heavy chain	-	-	-	--
Unigene9564_sinensis	1094	19	146	3.1177	28.7178	3.20339121526417	Up	4.75968e-31	3.14314830255924e-29	gi|260791259|ref|XP_002590657.1|	290.0	1e-76	hypothetical protein BRAFLDRAFT_89458 [Branchiostoma floridae] >gi|229275853|gb|EEN46668.1| hypothetical protein BRAFLDRAFT_89458 [Branchiostoma floridae]	--	--	--	--	sp|Q6NZQ0|CP093_MOUSE	178	2e-44	Coiled-coil domain-containing protein C16orf93 homolog OS=Mus musculus GN=Gm166 PE=2 SV=2	--	--	--	--	--	--	--	--	--	--	-	-	-	--
Unigene32102_sinensis	1121	106	814	16.9747	156.2549	3.20244344944405	Up	9.54542e-166	2.43597020505494e-163	gi|405978439|gb|EKC42828.1|	170.2	1e-40	hypothetical protein CGI_10010065 [Crassostrea gigas]	--	--	--	--	--	--	--	--	--	--	--	--	--	--	--	--	--	--	-	-	-	--
Unigene26060_sinensis	2595	182	1397	12.5903	115.8441	3.2018000039429	Up	4.73614e-283	2.15661527882353e-280	gi|334324298|ref|XP_003340504.1|	563.1	2e-158	PREDICTED: cAMP and cAMP-inhibited cGMP 3&apos;,5&apos;-cyclic phosphodiesterase 10A-like [Monodelphis domestica]	--	--	--	--	sp|Q9QYJ6|PDE10_RAT	554	3e-157	cAMP and cAMP-inhibited cGMP 3',5'-cyclic phosphodiesterase 10A OS=Rattus norvegicus GN=Pde10a PE=1 SV=1	--	--	--	--	--	K01120	3e-159	563	mdo:100032566	3',5'-cyclic-nucleotide phosphodiesterase [EC:3.1.4.17]	-	-	-	--
Unigene35810_sinensis	415	3	23	1.2977	11.9260	3.20008143457786	Up	6.43894e-06	0.000106327212813463	--	--	--	--	--	--	--	--	--	--	--	--	--	--	--	--	--	--	--	--	--	--	-	-	-	--
Unigene23845_sinensis	1151	3	23	0.4679	4.3000	3.20006452600387	Up	6.43894e-06	0.000106352420782361	gi|327283149|ref|XP_003226304.1|	141.0	1e-31	PREDICTED: kelch repeat and BTB domain-containing protein 10-like [Anolis carolinensis]	--	--	--	--	sp|Q9ER30|KBTBA_RAT	130	4e-30	Kelch repeat and BTB domain-containing protein 10 OS=Rattus norvegicus GN=Kbtbd10 PE=1 SV=1	--	--	--	--	--	K10473	1e-32	140	acs:100557908	kelch repeat and BTB domain-containing protein 5/10	-	-	-	--
CL3379.Contig3_sinensis	1604	9	69	1.0073	9.2568	3.20002013255202	Up	2.18524e-15	8.35126086450905e-14	gi|291230532|ref|XP_002735210.1|	210.7	1e-52	PREDICTED: MGC84161 protein-like [Saccoglossus kowalevskii]	--	--	--	--	sp|O42282|RDS2_CHICK	180	9e-45	Photoreceptor outer segment membrane glycoprotein 2 OS=Gallus gallus PE=2 SV=1	--	--	--	--	--	K07607	2e-49	197	spu:761646	peripherin	-	-	-	--
Unigene25672_sinensis	1082	88	674	14.6001	134.0441	3.19865756431202	Up	2.13982e-137	4.50390089365559e-135	gi|405964244|gb|EKC29750.1|	279.6	1e-73	Uncharacterized protein C2orf73-like protein [Crassostrea gigas]	--	--	--	--	sp|A6QQL5|CB073_BOVIN	79.7	1e-14	Uncharacterized protein C2orf73 homolog OS=Bos taurus PE=2 SV=1	--	--	--	--	--	--	--	--	--	--	-	-	-	--
Unigene15032_sinensis	1013	90	688	15.9490	146.1484	3.19589615976028	Up	4.26106e-140	9.19082938513932e-138	--	--	--	--	--	--	--	--	--	--	--	--	--	--	--	--	--	--	--	--	--	--	-	-	-	--
CL257.Contig4_sinensis	5101	11	84	0.3871	3.5436	3.1944375495628	Up	2.054e-18	8.97742321204517e-17	gi|405968554|gb|EKC33617.1|	249.6	1e-63	hypothetical protein CGI_10016472 [Crassostrea gigas]	--	--	--	--	sp|Q9P1Z9|CI174_HUMAN	679	0.0	Uncharacterized protein C9orf174 OS=Homo sapiens GN=C9orf174 PE=2 SV=2	--	--	--	--	--	K10352	7e-15	84.7	aag:AaeL_AAEL001411	myosin heavy chain	-	-	-	--
Unigene7058_sinensis	1942	11	84	1.0168	9.3078	3.19440427592074	Up	2.054e-18	8.97179473354232e-17	--	--	--	--	--	--	--	--	--	--	--	--	--	--	--	--	--	--	--	--	--	--	-	-	-	--
Unigene31029_sinensis	3814	313	2387	14.7321	134.6749	3.19244599357099	Up	0	0	gi|405965603|gb|EKC30966.1|	532.7	5e-149	hypothetical protein CGI_10019766 [Crassostrea gigas]	--	--	--	--	sp|Q02224|CENPE_HUMAN	86.7	4e-16	Centromere-associated protein E OS=Homo sapiens GN=CENPE PE=1 SV=2	aq_1006	70.1	3e-11	COG0419	ATPase involved in DNA repair	K10421	7e-20	100	phu:Phum_PHUM291650	CAP-Gly domain-containing linker protein 1	-	-	-	--
Unigene7896_sinensis	1156	8	61	1.2423	11.3550	3.19224219239058	Up	1.004186e-13	3.50679871849624e-12	gi|405976624|gb|EKC41124.1|	580.9	4e-164	Leucine-rich repeat-containing protein 69 [Crassostrea gigas]	--	--	--	--	sp|Q3KQF4|LRC69_XENLA	330	3e-90	Leucine-rich repeat-containing protein 69 OS=Xenopus laevis GN=lrrc69 PE=2 SV=1	alr0124_1	124	4e-28	COG4886	Leucine-rich repeat (LRR) protein	K12796	9e-27	121	dre:566811	erbb2-interacting protein	-	-	-	--
CL3379.Contig4_sinensis	1814	48	366	4.7501	43.4169	3.1922269293329	Up	2.97696e-75	3.8479003012987e-73	gi|291230532|ref|XP_002735210.1|	211.1	1e-52	PREDICTED: MGC84161 protein-like [Saccoglossus kowalevskii]	--	--	--	--	sp|O42282|RDS2_CHICK	182	3e-45	Photoreceptor outer segment membrane glycoprotein 2 OS=Gallus gallus PE=2 SV=1	--	--	--	--	--	K07607	4e-49	196	spu:761646	peripherin	-	-	-	--
CL2586.Contig2_sinensis	2272	8	61	0.6321	5.7775	3.19222063470389	Up	1.004186e-13	3.50504180531062e-12	gi|405957723|gb|EKC23913.1|	500.0	2e-139	Ankyrin repeat domain-containing protein 60 [Crassostrea gigas]	--	--	--	--	sp|Q9BZ19|ANR60_HUMAN	167	9e-41	Ankyrin repeat domain-containing protein 60 OS=Homo sapiens GN=ANKRD60 PE=2 SV=3	all2748	59.3	3e-08	COG0666	FOG: Ankyrin repeat	K10380	2e-13	79.0	phu:Phum_PHUM596790	ankyrin	-	-	-	--
Unigene33100_sinensis	2483	200	1524	14.4596	132.0758	3.19126660023182	Up	1.2e-307	6.28592481203007e-305	gi|405975636|gb|EKC40190.1|	657.1	0.0	Tektin-1 [Crassostrea gigas]	gi|194068376|dbj|AB374930.1|	123	4e-24	Saccostrea kegaki mRNA for tektin, partial cds	sp|Q969V4|TEKT1_HUMAN	453	9e-127	Tektin-1 OS=Homo sapiens GN=TEKT1 PE=2 SV=1	CAC2736	53.1	2e-06	COG0419	ATPase involved in DNA repair	K04688	1e-33	145	aag:AaeL_AAEL000743	p70 ribosomal S6 kinase [EC:2.7.11.1]	-	-	GO:0005737//cytoplasm;GO:0044446//intracellular organelle part	--
Unigene34614_sinensis	1899	41	312	3.8758	35.3545	3.18932782470397	Up	2.44832e-64	2.72479242939297e-62	gi|405974086|gb|EKC38756.1|	861.3	0.0	Coiled-coil domain-containing protein 63 [Crassostrea gigas]	--	--	--	--	sp|Q2T9W3|CCD63_BOVIN	285	2e-76	Coiled-coil domain-containing protein 63 OS=Bos taurus GN=CCDC63 PE=2 SV=1	MJ1643	74.3	7e-13	COG1196	Chromosome segregation ATPases	K10352	2e-13	78.2	acs:100555799	myosin heavy chain	-	-	-	--
Unigene23147_sinensis	1328	122	928	16.4916	150.3713	3.18872595959514	Up	6.34494e-188	1.84956328393305e-185	gi|145535882|ref|XP_001453674.1|	89.0	6e-16	hypothetical protein [Paramecium tetraurelia strain d4-2] >gi|124421396|emb|CAK86277.1| unnamed protein product [Paramecium tetraurelia]	--	--	--	--	sp|A8XWC4|DKF1_CAEBR	68.2	4e-11	Serine/threonine-protein kinase dkf-1 OS=Caenorhabditis briggsae GN=dkf-1 PE=3 SV=2	YBR028c	59.3	1e-08	COG0515	Serine/threonine protein kinase	K07376	3e-12	73.6	dmo:Dmoj_GI17596	protein kinase, cGMP-dependent [EC:2.7.11.12]	-	GO:0016740//transferase activity	-	--
Unigene31243_sinensis	1879	43	327	4.1081	37.4486	3.18836857965098	Up	2.47482e-67	2.9075587618887e-65	gi|405961240|gb|EKC27073.1|	87.4	2e-15	Sperm surface protein Sp17 [Crassostrea gigas]	gi|291233641|ref|XM_002736715.1|	73.8	3e-09	PREDICTED: Saccoglossus kowalevskii sperm autoantigenic protein 17-like (LOC100373522), mRNA	sp|O62770|SP17_MACEU	121	5e-27	Sperm surface protein Sp17 OS=Macropus eugenii GN=SPA17 PE=2 SV=1	--	--	--	--	--	K00907	5e-07	57.0	bfo:BRAFLDRAFT_69337	myosin-light-chain kinase [EC:2.7.11.18]	GO:0044763	-	GO:0005929//cilium	--
Unigene23789_sinensis	311	5	38	2.8861	26.2929	3.18748008062212	Up	5.26826e-09	1.30431558614072e-07	--	--	--	--	--	--	--	--	--	--	--	--	--	--	--	--	--	--	--	--	--	--	-	-	-	--
CL7816.Contig1_sinensis	2200	5	38	0.4080	3.7169	3.18745881694224	Up	5.26826e-09	1.3047792603626e-07	gi|405963710|gb|EKC29266.1|	560.8	1e-157	hypothetical protein CGI_10027482 [Crassostrea gigas]	--	--	--	--	sp|F5H4B4|F227A_HUMAN	158	4e-38	Protein FAM227A OS=Homo sapiens GN=FAM227A PE=2 SV=1	--	--	--	--	--	--	--	--	--	--	-	-	-	--
CL7060.Contig1_sinensis	1247	5	38	0.7198	6.5574	3.18745589426037	Up	5.26826e-09	1.305243264367e-07	gi|405971972|gb|EKC36771.1|	59.7	3e-07	Ninein-like protein [Crassostrea gigas]	--	--	--	--	sp|Q8IIG7|YPF05_PLAF7	99.8	1e-20	Uncharacterized protein PF11_0207 OS=Plasmodium falciparum (isolate 3D7) GN=PF11_0207 PE=4 SV=2	Ta1488	81.3	3e-15	COG1340	Uncharacterized archaeal coiled-coil protein	K11423	1e-18	94.7	dgr:Dgri_GH16034	histone-lysine N-methyltransferase SETD2 [EC:2.1.1.43]	-	-	-	--
Unigene3918_sinensis	886	5	38	1.0131	9.2292	3.18742901328199	Up	5.26826e-09	1.30385224134991e-07	gi|405975065|gb|EKC39661.1|	170.2	1e-40	hypothetical protein CGI_10025118 [Crassostrea gigas]	--	--	--	--	--	--	--	--	--	--	--	--	--	--	--	--	--	--	-	-	-	--
CL10307.Contig1_sinensis	2905	138	1046	8.5278	77.4819	3.18361382343357	Up	2.96324e-211	9.92528690192307e-209	gi|390335187|ref|XP_003724087.1|	83.6	6e-14	PREDICTED: probable serine/threonine-protein kinase DDB_G0292350-like [Strongylocentrotus purpuratus]	--	--	--	--	sp|Q55GU0|Y9955_DICDI	68.6	8e-11	Probable serine/threonine-protein kinase DDB_G0267514 OS=Dictyostelium discoideum GN=DDB_G0267514 PE=3 SV=1	BS_yloP_1	65.5	5e-10	COG0515	Serine/threonine protein kinase	K02644	1e-10	69.7	cqu:CpipJ_CPIJ004499	pole hole	GO:0009987//cellular process	GO:0016740//transferase activity	-	--
CL6324.Contig1_sinensis	3026	64	485	3.7968	34.4896	3.1833054861958	Up	6.6023e-99	1.02444462962138e-96	gi|405953933|gb|EKC21496.1|	566.6	2e-159	Tetratricopeptide repeat protein 29 [Crassostrea gigas]	--	--	--	--	sp|Q32NR4|TTC29_XENLA	311	4e-84	Tetratricopeptide repeat protein 29 OS=Xenopus laevis GN=ttc29 PE=2 SV=1	sll0499_1	67.8	1e-10	COG0457	FOG: TPR repeat	K15837	9e-10	67.0	acs:100562092	G-protein signaling modulator 2	-	-	-	--
Unigene27144_sinensis	739	114	863	27.6925	251.2936	3.18180672172108	Up	1.586488e-174	4.26753021127413e-172	--	--	--	--	--	--	--	--	--	--	--	--	--	--	--	--	--	--	--	--	--	--	-	-	-	--
CL1239.Contig1_sinensis	9051	85	643	1.6859	15.2873	3.1807427546964	Up	1.861958e-130	3.74915467924855e-128	gi|405957164|gb|EKC23395.1|	2106.3	0.0	hypothetical protein CGI_10019612 [Crassostrea gigas]	gi|449666319|ref|XM_002160360.2|	65.9	3e-06	PREDICTED: Hydra magnipapillata uncharacterized LOC100210255 (LOC100210255), partial mRNA	sp|Q75JC9|Y8484_DICDI	57.0	8e-07	Uncharacterized protein DDB_G0271670 OS=Dictyostelium discoideum GN=DDB_G0271670 PE=4 SV=1	--	--	--	--	--	K02308	8e-06	55.5	hsa:1616	death-associated protein 6	-	GO:0005524//ATP binding	-	--
CL2805.Contig2_sinensis	3253	82	620	4.5251	41.0131	3.18006321504533	Up	7.93804e-126	1.53195376387812e-123	gi|405963143|gb|EKC28743.1|	244.2	3e-62	Uncharacterized protein C7orf63 [Crassostrea gigas]	gi|260829512|ref|XM_002609660.1|	77.8	3e-10	Branchiostoma floridae hypothetical protein, mRNA	sp|B0VXE6|CG063_CALJA	848	0.0	Uncharacterized protein C7orf63 OS=Callithrix jacchus PE=4 SV=1	--	--	--	--	--	--	--	--	--	--	-	-	-	--
CL7702.Contig1_sinensis	1661	9	68	0.9727	8.8096	3.17900969213035	Up	4.26432e-15	1.60589681124324e-13	--	--	--	--	--	--	--	--	--	--	--	--	--	--	--	--	--	--	--	--	--	--	-	-	-	--
Unigene27544_sinensis	489	9	68	3.3040	29.9237	3.17900298046864	Up	4.26432e-15	1.60502922787682e-13	gi|358339569|dbj|GAA47606.1|	53.5	4e-06	hypothetical protein CLF_100574 [Clonorchis sinensis]	--	--	--	--	sp|Q55FI4|NOP58_DICDI	57.8	1e-08	Nucleolar protein 58 OS=Dictyostelium discoideum GN=nop58 PE=3 SV=1	YOR310c	50.8	1e-06	COG1498	Protein implicated in ribosomal biogenesis, Nop56p homolog	K04952	4e-08	57.4	rno:83686	cyclic nucleotide gated channel beta 1	-	-	-	--
Unigene28645_sinensis	1616	360	2715	39.9910	361.5293	3.17636531236234	Up	0	0	gi|405961383|gb|EKC27194.1|	411.8	5e-113	Sperm motility kinase X [Crassostrea gigas]	--	--	--	--	sp|Q61846|MELK_MOUSE	114	5e-25	Maternal embryonic leucine zipper kinase OS=Mus musculus GN=Melk PE=1 SV=2	ECU03g0620	85.9	2e-16	COG0515	Serine/threonine protein kinase	K08811	4e-27	123	aga:AgaP_AGAP008735	testis-specific serine kinase [EC:2.7.11.1]	-	GO:0016772//transferase activity, transferring phosphorus-containing groups	-	--
Unigene1678_sinensis	2003	15	113	1.3443	12.1398	3.17481761633261	Up	3.6854e-24	2.02331073758865e-22	--	--	--	--	--	--	--	--	--	--	--	--	--	--	--	--	--	--	--	--	--	--	-	-	-	--
Unigene24740_sinensis	1039	42	316	7.2566	65.4465	3.17295038786985	Up	7.96974e-65	8.98452776796116e-63	gi|405973244|gb|EKC37968.1|	87.0	1e-15	hypothetical protein CGI_10025548 [Crassostrea gigas]	--	--	--	--	--	--	--	--	--	--	--	--	--	--	--	--	--	--	-	-	-	--
Unigene24773_sinensis	1132	45	338	7.1362	64.2518	3.17050891757361	Up	3.5721e-69	4.31307859445407e-67	gi|405952388|gb|EKC20206.1|	328.9	2e-88	Spermatogenesis-associated protein 4 [Crassostrea gigas]	--	--	--	--	sp|Q8NEY3|SPAT4_HUMAN	166	9e-41	Spermatogenesis-associated protein 4 OS=Homo sapiens GN=SPATA4 PE=2 SV=1	--	--	--	--	--	--	--	--	--	--	-	-	-	--
Unigene24720_sinensis	2420	226	1697	16.7647	150.8973	3.17006842018653	Up	0	0	gi|291230532|ref|XP_002735210.1|	194.5	2e-47	PREDICTED: MGC84161 protein-like [Saccoglossus kowalevskii]	--	--	--	--	sp|O42282|RDS2_CHICK	157	1e-37	Photoreceptor outer segment membrane glycoprotein 2 OS=Gallus gallus PE=2 SV=1	--	--	--	--	--	K07607	2e-44	181	spu:761646	peripherin	-	-	-	--
Unigene16700_sinensis	2523	1418	10645	100.8929	907.9113	3.16972670457382	Up	0	0	gi|357619158|gb|EHJ71838.1|	167.9	2e-39	hypothetical protein KGM_17211 [Danaus plexippus]	--	--	--	--	sp|Q17Q32|ENOPH_AEDAE	165	5e-40	Enolase-phosphatase E1 OS=Aedes aegypti GN=AAEL000109 PE=3 SV=1	NMA0905	103	1e-21	COG3468	Type V secretory pathway, adhesin AidA	K09880	2e-39	165	aag:AaeL_AAEL000109	enolase-phosphatase E1 [EC:3.1.3.77]	-	-	-	--
CL264.Contig4_sinensis	2140	4	30	0.3355	3.0166	3.16853873682095	Up	2.54304e-07	5.15181895202094e-06	gi|405970944|gb|EKC35806.1|	73.6	5e-11	hypothetical protein CGI_10011202 [Crassostrea gigas]	--	--	--	--	--	--	--	--	--	--	--	--	--	--	--	--	--	--	-	-	-	--
Unigene9775_sinensis	938	4	30	0.7655	6.8823	3.16841649779852	Up	2.54304e-07	5.15032133023256e-06	gi|405958598|gb|EKC24710.1|	209.5	1e-52	Serine/threonine-protein kinase haspin [Crassostrea gigas]	--	--	--	--	sp|Q8TF76|HASP_HUMAN	175	1e-43	Serine/threonine-protein kinase haspin OS=Homo sapiens GN=GSG2 PE=1 SV=3	SPAC23C4.03	106	5e-23	COG5072	Serine/threonine kinase of the haspin family	K08286	2e-45	182	gga:427834	protein-serine/threonine kinase [EC:2.7.11.-]	GO:0007243//intracellular protein kinase cascade;GO:0071459//protein localization to chromosome, centromeric region;GO:0090231//regulation of spindle checkpoint;GO:2000751//histone H3-T3 phosphorylation involved in chromosome passenger complex localization to kinetochore;GO:0007064//mitotic sister chromatid cohesion	GO:0005515//protein binding;GO:0072354//histone kinase activity (H3-T3 specific);GO:0005524//ATP binding	GO:0031965//nuclear membrane;GO:0005737//cytoplasm;GO:0005819//spindle;GO:0005813//centrosome	--
Unigene11614_sinensis	826	4	30	0.8693	7.8155	3.16841212349211	Up	2.54304e-07	5.14732869726903e-06	gi|405960256|gb|EKC26197.1|	144.8	4e-33	Homeobox protein ceh-9 [Crassostrea gigas]	gi|353231633|emb|HE601627.1|	87.7	8e-14	Schistosoma mansoni strain Puerto Rico chromosome 4, complete genome	sp|P56407|HM09_CAEEL	105	2e-22	Homeobox protein ceh-9 OS=Caenorhabditis elegans GN=ceh-9 PE=4 SV=2	--	--	--	--	--	K09350	2e-18	93.6	xtr:100038084	homeobox protein Nkx-6.2	-	-	-	--
Unigene31572_sinensis	595	6	45	1.8102	16.2746	3.16840107758149	Up	2.17356e-10	6.13324226974484e-09	--	--	--	--	--	--	--	--	--	--	--	--	--	--	--	--	--	--	--	--	--	--	-	-	-	--
Unigene14139_sinensis	1063	4	30	0.6755	6.0730	3.16838169452439	Up	2.54304e-07	5.14882457890148e-06	--	--	--	--	--	--	--	--	--	--	--	--	--	--	--	--	--	--	--	--	--	--	-	-	-	--
Unigene31187_sinensis	1705	150	1124	15.7931	141.8590	3.16709139462297	Up	1.001238e-225	3.52299243545454e-223	gi|405978565|gb|EKC42945.1|	58.9	9e-07	Pyroglutamylated RFamide peptide receptor [Crassostrea gigas]	--	--	--	--	--	--	--	--	--	--	--	--	--	--	--	--	--	--	-	-	-	--
CL9528.Contig2_sinensis	4838	57	427	2.1150	18.9923	3.16668506044535	Up	7.56384e-87	1.08429047111111e-84	gi|405972406|gb|EKC37178.1|	944.9	0.0	HEAT repeat-containing protein 4 [Crassostrea gigas]	--	--	--	--	sp|Q86WZ0|HEAT4_HUMAN	373	3e-102	HEAT repeat-containing protein 4 OS=Homo sapiens GN=HEATR4 PE=2 SV=2	--	--	--	--	--	K11643	4e-08	62.4	phu:Phum_PHUM578860	chromodomain-helicase-DNA-binding protein 4 [EC:3.6.4.12]	-	-	-	--
Unigene37835_sinensis	2233	25	187	2.0098	18.0205	3.16451519335102	Up	6.60574e-39	5.08525193436464e-37	gi|405953470|gb|EKC21126.1|	108.6	1e-21	Zinc finger protein ZFAT [Crassostrea gigas]	--	--	--	--	sp|B2RRE4|Z518B_MOUSE	64.7	8e-10	Zinc finger protein 518B OS=Mus musculus GN=Znf518b PE=2 SV=1	--	--	--	--	--	K09222	5e-15	84.0	acs:100564403	RE1-silencing transcription factor	-	-	-	--
Unigene26536_sinensis	3231	135	1009	7.5006	67.2000	3.16338332129599	Up	1.355446e-202	4.31198937780822e-200	gi|405952436|gb|EKC20248.1|	142.5	1e-31	Cadherin EGF LAG seven-pass G-type receptor 1 [Crassostrea gigas]	--	--	--	--	sp|Q25390|SCRA_LIMPO	110	2e-23	Alpha-scruin OS=Limulus polyphemus PE=2 SV=1	--	--	--	--	--	K13956	1e-23	112	aag:AaeL_AAEL003701	actin-binding protein IPP	-	-	-	--
CL8793.Contig1_sinensis	3817	28	209	1.3169	11.7825	3.16142797884785	Up	2.89636e-43	2.44293589394673e-41	gi|405951985|gb|EKC19847.1|	1201.4	0.0	hypothetical protein CGI_10007458 [Crassostrea gigas]	--	--	--	--	sp|Q5T1B0|AXDN1_HUMAN	521	5e-147	Axonemal dynein light chain domain-containing protein 1 OS=Homo sapiens GN=AXDND1 PE=2 SV=1	SPAC140.02	55.5	7e-07	COG0724	RNA-binding proteins (RRM domain)	K04572	2e-14	82.8	dre:793912	neurofilament light polypeptide	-	-	-	--
Unigene20258_sinensis	898	72	537	14.3932	128.6806	3.16033528476865	Up	1.441448e-108	2.44341218277372e-106	--	--	--	--	--	--	--	--	--	--	--	--	--	--	--	--	--	--	--	--	--	--	-	-	-	--
Unigene29729_sinensis	1797	11	82	1.0989	9.8193	3.15956007422546	Up	7.79544e-18	3.33395033370166e-16	gi|405964919|gb|EKC30358.1|	370.5	1e-100	Forkhead box protein J1-A [Crassostrea gigas]	gi|418205354|gb|JX842846.1|	75.8	7e-10	Schmidtea mediterranea forkhead box J1-like protein 4 mRNA, complete cds	sp|Q708W2|FXJ1A_XENLA	189	2e-52	Forkhead box protein J1-A OS=Xenopus laevis GN=foxj1-a PE=2 SV=1	YNL068c	110	1e-23	COG5025	Transcription factor of the Forkhead/HNF3 family	K09402	8e-79	248	bfo:BRAFLDRAFT_118651	forkhead box protein J1	GO:0048869//cellular developmental process;GO:0048513//organ development;GO:0048523//negative regulation of cellular process;GO:0002683//negative regulation of immune system process;GO:0044767;GO:0006355//regulation of transcription, DNA-dependent	GO:0003700//sequence-specific DNA binding transcription factor activity;GO:0003677//DNA binding	GO:0005634//nucleus	--
Unigene20458_sinensis	795	216	1609	48.7740	435.5158	3.15854085998175	Up	0	0	gi|405969521|gb|EKC34487.1|	136.7	1e-30	hypothetical protein CGI_10016255 [Crassostrea gigas]	--	--	--	--	--	--	--	--	--	--	--	--	--	--	--	--	--	--	-	-	-	--
Unigene34247_sinensis	1325	9	67	1.2193	10.8811	3.15769937043702	Up	8.30812e-15	3.08703153216e-13	--	--	--	--	--	--	--	--	--	--	--	--	--	--	--	--	--	--	--	--	--	--	-	-	-	--
Unigene32034_sinensis	854	16	119	3.3633	29.9850	3.15629159741745	Up	3.11398e-25	1.76380384243902e-23	--	--	--	--	--	--	--	--	--	--	--	--	--	--	--	--	--	--	--	--	--	--	-	-	-	--
CL1890.Contig2_sinensis	3963	23	171	1.0419	9.2851	3.15570063143427	Up	1.292146e-35	9.3871240535975e-34	gi|405958476|gb|EKC24603.1|	576.2	4e-162	Putative ATP-dependent RNA helicase DDX58 [Crassostrea gigas]	--	--	--	--	sp|Q9BYX4|IFIH1_HUMAN	340	1e-92	Interferon-induced helicase C domain-containing protein 1 OS=Homo sapiens GN=IFIH1 PE=1 SV=3	MA0096_1	133	2e-30	COG1111	ERCC4-like helicases	K12646	1e-101	372	bfo:BRAFLDRAFT_249506	ATP-dependent RNA helicase DDX58 [EC:3.6.3.14]	GO:0001817//regulation of cytokine production;GO:0009987//cellular process	GO:0003676//nucleic acid binding	GO:0005622//intracellular	--
Unigene6755_sinensis	1545	28	208	3.2534	28.9701	3.15454454926218	Up	5.62232e-43	4.72498687671894e-41	gi|405959254|gb|EKC25310.1|	139.8	3e-31	hypothetical protein CGI_10013679 [Crassostrea gigas]	--	--	--	--	--	--	--	--	--	--	--	--	--	--	--	--	--	--	-	-	-	--
Unigene37630_sinensis	6514	771	5721	21.2475	188.9902	3.15294641854752	Up	0	0	gi|405957871|gb|EKC24049.1|	169.5	2e-39	Serine/threonine-protein kinase/endoribonuclease IRE2 [Crassostrea gigas]	--	--	--	--	sp|Q09499|IRE1_CAEEL	126	7e-28	Serine/threonine-protein kinase/endoribonuclease ire-1 OS=Caenorhabditis elegans GN=ire-1 PE=2 SV=2	SPAC167.01	102	7e-21	COG0515	Serine/threonine protein kinase	K08852	8e-30	134	bmy:Bm1_25785	serine/threonine-protein kinase/endoribonuclease IRE1 [EC:2.7.11.1 3.1.26.-]	-	-	-	--
Unigene30188_sinensis	1456	165	1224	20.3434	180.8985	3.15254772264656	Up	1.534346e-244	5.9058757720442e-242	gi|443705461|gb|ELU01997.1|	136.7	3e-30	hypothetical protein CAPTEDRAFT_192869 [Capitella teleta]	gi|30407150|emb|AL844508.1|	61.9	8e-06	Plasmodium falciparum 3D7 chromosome 9	sp|O43247|TEX33_HUMAN	62.4	2e-09	Testis-expressed sequence 33 protein OS=Homo sapiens GN=TEX33 PE=2 SV=2	--	--	--	--	--	--	--	--	--	--	-	-	-	--
CL2452.Contig2_sinensis	4243	127	942	5.3732	47.7741	3.15237525120201	Up	1.256592e-188	3.69390329316456e-186	gi|195379716|ref|XP_002048623.1|	67.0	1e-08	GJ11255 [Drosophila virilis] >gi|194155781|gb|EDW70965.1| GJ11255 [Drosophila virilis]	--	--	--	--	sp|Q9NZW4|DSPP_HUMAN	62.4	8e-09	Dentin sialophosphoprotein OS=Homo sapiens GN=DSPP PE=1 SV=2	--	--	--	--	--	K06672	3e-07	59.3	xtr:100038237	cohesin loading factor subunit SCC2	-	-	-	--
Unigene35329_sinensis	1860	17	126	1.6407	14.5771	3.15132036227456	Up	1.354848e-26	7.9453624e-25	gi|405971270|gb|EKC36116.1|	127.1	3e-27	Putative ferric-chelate reductase 1 [Crassostrea gigas]	--	--	--	--	sp|Q8K385|FRRS1_MOUSE	99.0	3e-20	Ferric-chelate reductase 1 OS=Mus musculus GN=FRRS1 PE=1 SV=1	--	--	--	--	--	K12349	5e-18	93.6	smm:Smp_147460	neutral ceramidase [EC:3.5.1.23]	GO:0055114//oxidation-reduction process	GO:0016491//oxidoreductase activity	-	--
CL2898.Contig1_sinensis	1725	5	37	0.5203	4.6156	3.14910258923787	Up	1.029612e-08	2.45994644814815e-07	gi|405964883|gb|EKC30325.1|	350.1	2e-94	hypothetical protein CGI_10024559 [Crassostrea gigas]	--	--	--	--	--	--	--	--	--	--	--	--	--	--	--	--	--	--	-	-	-	--
CL7702.Contig2_sinensis	423	5	37	2.1219	18.8225	3.14902968695759	Up	1.029612e-08	2.45910313431608e-07	--	--	--	--	--	--	--	--	--	--	--	--	--	--	--	--	--	--	--	--	--	--	-	-	-	--
Unigene31619_sinensis	931	5	37	0.9641	8.5520	3.14900715209037	Up	1.029612e-08	2.46079034058319e-07	gi|405970712|gb|EKC35593.1|	60.1	1e-07	Galactosylceramide sulfotransferase [Crassostrea gigas]	--	--	--	--	--	--	--	--	--	--	--	--	--	--	--	--	--	--	-	-	-	--
Unigene29435_sinensis	1353	65	481	8.6242	76.5001	3.14899909318762	Up	4.3225e-97	6.64777599337748e-95	gi|126697474|gb|ABO26694.1|	481.5	4e-134	axonemal dynein light chain p33 [Haliotis discus discus]	gi|126697473|gb|EF103436.1|	230	1e-56	Haliotis discus discus axonemal dynein light chain p33 mRNA, partial cds	sp|Q26630|IDLC_STRPU	441	2e-123	33 kDa inner dynein arm light chain, axonemal OS=Strongylocentrotus purpuratus PE=1 SV=1	--	--	--	--	--	K10410	8e-123	441	spu:373273	dynein light intermediate chain, axonemal	-	GO:0003774//motor activity	GO:0030286//dynein complex	--
Unigene31466_sinensis	1392	35	259	4.5137	40.0383	3.14899828050326	Up	4.8436e-53	4.75950308039492e-51	gi|291237107|ref|XP_002738480.1|	236.9	2e-60	PREDICTED: TRZ1 (TRNASE Z 1); 3-tRNA processing endoribonuclease-like [Saccoglossus kowalevskii]	--	--	--	--	--	--	--	--	TM0864	60.8	5e-09	COG1234	Metal-dependent hydrolases of the beta-lactamase superfamily III	--	--	--	--	--	-	-	-	--
Unigene2383_sinensis	1532	5	37	0.5859	5.1971	3.14898046383112	Up	1.029612e-08	2.45826039849212e-07	gi|351695188|gb|EHA98106.1|	454.9	5e-126	Serine/threonine-protein kinase Nek2 [Heterocephalus glaber]	gi|148224039|ref|NM_001086021.1|	81.8	9e-12	Xenopus laevis NIMA-related kinase 2 (nek2), mRNA >gi|27696903|gb|BC043822.1| Xenopus laevis similar to NIMA (never in mitosis gene a)-related kinase 2, mRNA (cDNA clone MGC:53202 IMAGE:5543213), complete cds	sp|P51955|NEK2_HUMAN	448	2e-125	Serine/threonine-protein kinase Nek2 OS=Homo sapiens GN=NEK2 PE=1 SV=1	YAR018c	234	3e-61	COG0515	Serine/threonine protein kinase	K08857	2e-126	452	bfo:BRAFLDRAFT_115429	NIMA (never in mitosis gene a)-related kinase [EC:2.7.11.1]	GO:0051225//spindle assembly;GO:0046777//protein autophosphorylation;GO:0046602//regulation of mitotic centrosome separation;GO:0051988//regulation of attachment of spindle microtubules to kinetochore;GO:0000086//G2/M transition of mitotic cell cycle	GO:0004674//protein serine/threonine kinase activity;GO:0019903//protein phosphatase binding	GO:0005829//cytosol;GO:0000776//kinetochore;GO:0005813//centrosome	--
Unigene32174_sinensis	1647	366	2708	39.8923	353.8100	3.14879261472748	Up	0	0	gi|405972227|gb|EKC37006.1|	109.0	7e-22	hypothetical protein CGI_10025990 [Crassostrea gigas]	--	--	--	--	sp|Q8CH25|SLTM_MOUSE	59.3	2e-08	SAFB-like transcription modulator OS=Mus musculus GN=Sltm PE=1 SV=1	--	--	--	--	--	K04978	3e-06	54.3	acs:100562800	transient receptor potential cation channel subfamily M member 3	-	-	-	--
Unigene25618_sinensis	829	89	658	19.2725	170.7994	3.14768727379649	Up	4.0499e-132	8.22601991545189e-130	gi|405978370|gb|EKC42769.1|	207.6	5e-52	Leucine-rich repeat-containing protein 51, partial [Crassostrea gigas] >gi|405978371|gb|EKC42770.1| Leucine-rich repeat-containing protein 51, partial [Crassostrea gigas]	--	--	--	--	sp|B6CZ61|LRC51_RAT	150	3e-36	Leucine-rich repeat-containing protein 51 OS=Rattus norvegicus GN=Lrrc51 PE=2 SV=1	SPBC1861.08c	49.3	8e-06	COG4886	Leucine-rich repeat (LRR) protein	K11092	3e-10	66.2	phu:Phum_PHUM308180	U2 small nuclear ribonucleoprotein A'	GO:0044237//cellular metabolic process;GO:0044707	GO:0008168//methyltransferase activity	-	--
Unigene26988_sinensis	741	103	761	24.9529	220.9945	3.14673106606342	Up	1.795024e-152	4.22491645459459e-150	--	--	--	--	--	--	--	--	--	--	--	--	--	--	--	--	--	--	--	--	--	--	-	-	-	--
CL2875.Contig2_sinensis	2492	31	229	2.2331	19.7744	3.14651415797833	Up	4.80606e-47	4.3316092385511e-45	gi|405967159|gb|EKC32359.1|	770.8	0.0	Leucine-rich repeat-containing protein 43 [Crassostrea gigas]	--	--	--	--	sp|Q95JT3|LRC43_MACFA	306	2e-82	Leucine-rich repeat-containing protein 43 OS=Macaca fascicularis GN=LRRC43 PE=2 SV=1	YKL193c	52.4	4e-06	COG4886	Leucine-rich repeat (LRR) protein	K10411	1e-08	63.2	api:100165296	dynein light chain 1, axonemal	-	-	-	--
Unigene26379_sinensis	2125	118	871	9.9684	88.2011	3.14536278309346	Up	3.57964e-174	9.59192073692307e-172	gi|405961917|gb|EKC27650.1|	839.7	0.0	EF-hand domain-containing family member B [Crassostrea gigas]	--	--	--	--	sp|Q8CDU5|EFHB_MOUSE	538	1e-152	EF-hand domain-containing family member B OS=Mus musculus GN=Efhb PE=2 SV=2	--	--	--	--	--	--	--	--	--	--	-	-	-	--
CL10266.Contig1_sinensis	1744	8	59	0.8235	7.2798	3.14405826033612	Up	3.8155e-13	1.28789762354651e-11	--	--	--	--	--	--	--	--	--	--	--	--	--	--	--	--	--	--	--	--	--	--	-	-	-	--
CL2593.Contig2_sinensis	1207	35	258	5.2055	45.9968	3.14342484688333	Up	9.39066e-53	9.21461819070423e-51	--	--	--	--	gi|459300419|gb|GAFW01014334.1|	61.9	7e-06	TSA: Dendroctonus ponderosae Dendroctonus_ponderosae_CAP3_Contig14339 transcribed RNA sequence	--	--	--	--	--	--	--	--	--	--	--	--	--	--	-	-	-	--
Unigene34178_sinensis	2531	202	1489	14.3272	126.5953	3.14339525119021	Up	3.20808e-296	1.60794047136691e-293	gi|291227942|ref|XP_002733940.1|	666.4	0.0	PREDICTED: predicted protein-like [Saccoglossus kowalevskii]	--	--	--	--	sp|Q95J53|BTBDG_MACFA	305	3e-82	BTB/POZ domain-containing protein 16 OS=Macaca fascicularis GN=BTBD16 PE=2 SV=1	--	--	--	--	--	K10487	1e-180	634	spu:582798	BTB/POZ domain-containing protein 16	-	-	-	--
Unigene30931_sinensis	1305	103	759	14.1686	125.1544	3.14293989448429	Up	6.73534e-152	1.56937927244147e-149	--	--	--	--	--	--	--	--	--	--	--	--	--	--	--	--	--	--	--	--	--	--	-	-	-	--
Unigene27447_sinensis	429	19	140	7.9506	70.2240	3.14282853126454	Up	2.57522e-29	1.63102729254545e-27	--	--	--	--	--	--	--	--	--	--	--	--	--	--	--	--	--	--	--	--	--	--	-	-	-	--
Unigene33093_sinensis	1504	113	832	13.4875	119.0393	3.14174308311792	Up	2.8622e-166	7.35817755719557e-164	gi|307199133|gb|EFN79843.1|	80.9	2e-13	hypothetical protein EAI_11049 [Harpegnathos saltator]	--	--	--	--	sp|Q08696|MST2_DROHY	81.3	5e-15	Axoneme-associated protein mst101(2) OS=Drosophila hydei GN=mst101(2) PE=1 SV=1	NMA0905	50.8	6e-06	COG3468	Type V secretory pathway, adhesin AidA	K14822	4e-13	77.0	tgu:100219403	rRNA-processing protein CGR1	-	-	-	--
Unigene23932_sinensis	616	21	154	6.1198	53.7966	3.13595858550136	Up	4.91746e-32	3.3229342457808e-30	gi|405955495|gb|EKC22589.1|	234.2	3e-60	hypothetical protein CGI_10001933 [Crassostrea gigas]	--	--	--	--	sp|Q5NC57|F183B_MOUSE	114	1e-25	Protein FAM183B OS=Mus musculus GN=Fam183b PE=2 SV=2	--	--	--	--	--	--	--	--	--	--	-	-	-	--
Unigene26785_sinensis	1426	69	506	8.6862	76.3565	3.13595389817385	Up	1.225316e-101	1.9357492155102e-99	gi|405959092|gb|EKC25160.1|	446.8	1e-123	Radial spoke head protein 9-like protein [Crassostrea gigas]	gi|296434237|ref|NM_001184860.1|	69.9	3e-08	Saccoglossus kowalevskii radial spoke head 9 homolog-like (LOC100367636), mRNA	sp|Q9H1X1|RSPH9_HUMAN	323	6e-88	Radial spoke head protein 9 homolog OS=Homo sapiens GN=RSPH9 PE=1 SV=1	--	--	--	--	--	--	--	--	--	--	GO:0035083//cilium axoneme assembly;GO:0003341//cilium movement	-	GO:0035085//cilium axoneme	--
CL3109.Contig1_sinensis	3678	12	88	0.5857	5.1486	3.13594639047574	Up	6.50964e-19	2.91840482084942e-17	gi|405970093|gb|EKC35028.1|	1673.3	0.0	Tetratricopeptide repeat protein 18 [Crassostrea gigas]	gi|390333525|ref|XM_003723685.1|	155	2e-33	PREDICTED: Strongylocentrotus purpuratus tetratricopeptide repeat domain 18, transcript variant 1 (ttc18), mRNA	sp|Q5T0N1|TTC18_HUMAN	941	0.0	Tetratricopeptide repeat protein 18 OS=Homo sapiens GN=TTC18 PE=2 SV=2	MTH1585	60.1	3e-08	COG0457	FOG: TPR repeat	K03350	7e-09	64.3	dmo:Dmoj_GI13353	anaphase-promoting complex subunit 3	-	-	-	--
Unigene8165_sinensis	1848	12	88	1.1657	10.2470	3.13593314066138	Up	6.50964e-19	2.92028402549903e-17	gi|291221505|ref|XP_002730763.1|	620.9	7e-176	PREDICTED: hypothetical protein [Saccoglossus kowalevskii]	gi|471404647|ref|XM_004384312.1|	69.9	4e-08	PREDICTED: Trichechus manatus latirostris WD repeat containing, antisense to TP73 (WRAP73), mRNA	sp|Q9P2S5|WRP73_HUMAN	570	3e-162	WD repeat-containing protein WRAP73 OS=Homo sapiens GN=WRAP73 PE=2 SV=1	all0664	55.5	3e-07	COG2319	FOG: WD40 repeat	--	--	--	--	--	-	-	-	--
Unigene8871_sinensis	748	3	22	0.7200	6.3290	3.13590875607294	Up	1.26381e-05	0.000199339775616935	gi|291222504|ref|XP_002731256.1|	111.3	4e-23	PREDICTED: ninein-like [Saccoglossus kowalevskii]	--	--	--	--	sp|Q61043|NIN_MOUSE	88.6	1e-17	Ninein OS=Mus musculus GN=Nin PE=2 SV=3	--	--	--	--	--	K11422	6e-06	51.6	spu:586687	histone-lysine N-methyltransferase SETD1 [EC:2.1.1.43]	-	-	-	--
CL4033.Contig1_sinensis	518	3	22	1.0397	9.1392	3.13590057817922	Up	1.26381e-05	0.000199294655703938	--	--	--	--	--	--	--	--	--	--	--	--	--	--	--	--	--	--	--	--	--	--	-	-	-	--
Unigene35975_sinensis	2533	80	586	5.6697	49.7826	3.13429727485104	Up	2.26666e-117	4.12313147624021e-115	gi|443718278|gb|ELU08983.1|	964.5	0.0	hypothetical protein CAPTEDRAFT_182544 [Capitella teleta]	gi|390346748|ref|XM_775906.3|	79.8	6e-11	PREDICTED: Strongylocentrotus purpuratus coiled-coil domain-containing protein 164-like (LOC575509), mRNA	sp|Q7T0Y4|CC164_XENLA	744	0.0	Coiled-coil domain-containing protein 164 OS=Xenopus laevis GN=ccdc164 PE=2 SV=1	PAB0812	75.9	3e-13	COG0419	ATPase involved in DNA repair	K12478	2e-18	95.1	dre:562943	early endosome antigen 1	GO:0060285//ciliary cell motility;GO:0060286//flagellar cell motility;GO:0070286//axonemal dynein complex assembly	-	GO:0043229//intracellular organelle	--
Unigene29060_sinensis	885	22	161	4.4625	39.1469	3.13297399235	Up	2.15204e-33	1.49482028673978e-31	gi|113373879|dbj|BAF03560.1|	228.8	2e-58	clam ADP-ribosylating protein CARP-1 [Meretrix lamarckii]	--	--	--	--	--	--	--	--	--	--	--	--	--	--	--	--	--	--	-	-	-	--
Unigene20450_sinensis	872	188	1375	38.7029	339.3136	3.13210567938428	Up	9.96916e-273	4.34088380025e-270	--	--	--	--	--	--	--	--	--	--	--	--	--	--	--	--	--	--	--	--	--	--	-	-	-	--
Unigene32840_sinensis	1501	48	351	5.7407	50.3201	3.13183621954923	Up	6.20954e-71	7.67043337340425e-69	gi|405971678|gb|EKC36501.1|	402.1	3e-110	Uncharacterized protein C15orf26-like protein [Crassostrea gigas]	--	--	--	--	sp|Q568D2|CO026_DANRE	220	7e-57	Uncharacterized protein C15orf26 homolog OS=Danio rerio GN=zgc:110373 PE=2 SV=1	--	--	--	--	--	--	--	--	--	--	-	-	-	--
CL8754.Contig2_sinensis	1209	13	95	1.9303	16.9088	3.13087728851605	Up	2.80432e-20	1.33179393374233e-18	--	--	--	--	--	--	--	--	--	--	--	--	--	--	--	--	--	--	--	--	--	--	-	-	-	--
Unigene25678_sinensis	631	40	292	11.3797	99.5792	3.12938190035734	Up	3.0617e-59	3.21727869230769e-57	--	--	--	--	--	--	--	--	--	--	--	--	--	--	--	--	--	--	--	--	--	--	-	-	-	--
Unigene31032_sinensis	1359	175	1276	23.1164	202.0441	3.12768157884772	Up	7.02092e-253	2.79508843131429e-250	--	--	--	--	--	--	--	--	--	--	--	--	--	--	--	--	--	--	--	--	--	--	-	-	-	--
Unigene4741_sinensis	795	7	51	1.5806	13.8044	3.12658396501672	Up	1.765116e-11	5.44855412512184e-10	--	--	--	--	--	--	--	--	--	--	--	--	--	--	--	--	--	--	--	--	--	--	-	-	-	--
CL2385.Contig1_sinensis	2621	14	102	0.9589	8.3743	3.12651632687913	Up	1.211204e-21	6.05332650473458e-20	gi|2440214|emb|CAA75104.1|	94.4	3e-17	invariant surface glycoprotein 100 [Trypanosoma brucei brucei]	--	--	--	--	sp|Q17Q32|ENOPH_AEDAE	85.5	5e-16	Enolase-phosphatase E1 OS=Aedes aegypti GN=AAEL000109 PE=3 SV=1	SPCC737.08	63.9	1e-09	COG5271	AAA ATPase containing von Willebrand factor type A (vWA) domain	K09880	2e-15	85.5	aag:AaeL_AAEL000109	enolase-phosphatase E1 [EC:3.1.3.77]	-	-	-	--
CL3729.Contig2_sinensis	1624	19	138	2.1002	18.2856	3.12210934019353	Up	9.6771e-29	6.02496764879357e-27	gi|405967772|gb|EKC32902.1|	583.2	1e-164	Protein FAM47E [Crassostrea gigas]	gi|459173860|ref|XM_002127232.2|	61.9	9e-06	PREDICTED: Ciona intestinalis protein FAM47E-like (LOC100181941), mRNA	sp|Q6ZV65|FA47E_HUMAN	150	1e-35	Protein FAM47E OS=Homo sapiens GN=FAM47E PE=2 SV=3	--	--	--	--	--	K04573	1e-07	58.9	hsa:4741	neurofilament medium polypeptide (neurofilament 3)	-	-	-	--
Unigene32005_sinensis	4204	315	2287	13.4508	117.0627	3.12151757309481	Up	0	0	gi|405973429|gb|EKC38146.1|	1151.0	0.0	WD repeat-containing protein on Y chromosome [Crassostrea gigas]	--	--	--	--	sp|B7FF06|WDY_DROGR	313	2e-84	WD repeat-containing protein on Y chromosome OS=Drosophila grimshawi GN=WDY PE=4 SV=1	all0284_3	69.7	4e-11	COG2319	FOG: WD40 repeat	K14963	7e-13	77.8	nve:NEMVE_v1g237480	COMPASS component SWD3	-	-	-	--
CL1988.Contig2_sinensis	875	43	312	8.8219	76.7294	3.12061816144729	Up	5.1228e-63	5.58529504225352e-61	--	--	--	--	--	--	--	--	--	--	--	--	--	--	--	--	--	--	--	--	--	--	-	-	-	--
Unigene26591_sinensis	1926	651	4723	60.6773	527.6873	3.12045446667622	Up	0	0	--	--	--	--	--	--	--	--	--	--	--	--	--	--	--	--	--	--	--	--	--	--	-	-	-	--
CL2521.Contig2_sinensis	2006	24	174	2.1477	18.6652	3.11948657674221	Up	8.0009e-36	5.85519645063025e-34	gi|156387538|ref|XP_001634260.1|	75.1	1e-11	predicted protein [Nematostella vectensis] >gi|156221341|gb|EDO42197.1| predicted protein [Nematostella vectensis]	--	--	--	--	sp|Q3KQU3|MA7D1_HUMAN	59.7	2e-08	MAP7 domain-containing protein 1 OS=Homo sapiens GN=MAP7D1 PE=1 SV=1	--	--	--	--	--	K10433	1e-08	62.4	tgu:100220304	microtubule-associated protein 7	-	-	-	--
CL8274.Contig2_sinensis	518	4	29	1.3862	12.0471	3.11947857138157	Up	4.9698e-07	9.67694231973169e-06	--	--	--	--	--	--	--	--	--	--	--	--	--	--	--	--	--	--	--	--	--	--	-	-	-	--
Unigene31602_sinensis	1991	129	935	11.6311	101.0544	3.11907268947239	Up	2.6301e-185	7.57175359090909e-183	gi|405972230|gb|EKC37009.1|	848.6	0.0	Growth arrest-specific protein 8 [Crassostrea gigas]	gi|291227692|ref|XM_002733771.1|	151	2e-32	PREDICTED: Saccoglossus kowalevskii growth arrest-specific 8-like (LOC100373466), mRNA	sp|O95995|GAS8_HUMAN	710	0.0	Growth arrest-specific protein 8 OS=Homo sapiens GN=GAS8 PE=1 SV=1	aq_1006	84.3	7e-16	COG0419	ATPase involved in DNA repair	K10352	2e-17	91.7	bmy:Bm1_40715	myosin heavy chain	GO:0008285//negative regulation of cell proliferation;GO:0030317//sperm motility;GO:0034613//cellular protein localization	GO:0017137//Rab GTPase binding	GO:0005794//Golgi apparatus;GO:0031514//motile cilium;GO:0005932//microtubule basal body;GO:0005874//microtubule	--
CL6928.Contig1_sinensis	2542	540	3911	38.1347	331.0757	3.11798486952399	Up	0	0	gi|405950079|gb|EKC18085.1|	716.1	0.0	Tektin-2 [Crassostrea gigas]	--	--	--	--	sp|Q9UIF3|TEKT2_HUMAN	476	8e-134	Tektin-2 OS=Homo sapiens GN=TEKT2 PE=1 SV=1	SSO2249	55.5	5e-07	COG0419	ATPase involved in DNA repair	K04688	4e-18	94.4	cqu:CpipJ_CPIJ003064	p70 ribosomal S6 kinase [EC:2.7.11.1]	GO:0048870//cell motility;GO:0000226//microtubule cytoskeleton organization	-	GO:0005874//microtubule	--
Unigene8792_sinensis	1773	47	340	4.7587	41.2653	3.11628971737051	Up	1.964466e-68	2.34353393414384e-66	gi|405973836|gb|EKC38526.1|	425.2	5e-117	hypothetical protein CGI_10017082 [Crassostrea gigas]	--	--	--	--	sp|A0JPI9|CN16B_RAT	246	9e-65	Uncharacterized protein C14orf166B homolog OS=Rattus norvegicus PE=2 SV=1	--	--	--	--	--	K08727	2e-15	84.7	rno:500133	nucleotide-binding oligomerization domain-containing protein 1	-	-	-	--
Unigene31774_sinensis	991	99	716	17.9334	155.4728	3.11594126228044	Up	3.41022e-142	7.44785633793103e-140	--	--	--	--	--	--	--	--	--	--	--	--	--	--	--	--	--	--	--	--	--	--	-	-	-	--
Unigene36824_sinensis	2670	26	188	1.7481	15.1517	3.11562004955674	Up	1.540168e-38	1.18043965227723e-36	gi|405978127|gb|EKC42538.1|	608.6	5e-172	Angiotensin-converting enzyme [Crassostrea gigas]	--	--	--	--	sp|Q9GLN7|ACE_PANTR	506	1e-142	Angiotensin-converting enzyme OS=Pan troglodytes GN=ACE PE=3 SV=1	--	--	--	--	--	K01283	2e-150	533	nve:NEMVE_v1g210990	peptidyl-dipeptidase A [EC:3.4.15.1]	GO:0044763;GO:0003081//regulation of systemic arterial blood pressure by renin-angiotensin;GO:0043171//peptide catabolic process;GO:0001822//kidney development;GO:0044057;GO:0050482//arachidonic acid secretion;GO:0002376//immune system process;GO:0050880//regulation of blood vessel size;GO:0042447//hormone catabolic process;GO:0019538//protein metabolic process	GO:0004175//endopeptidase activity;GO:0008270//zinc ion binding;GO:0008144//drug binding;GO:0031404//chloride ion binding;GO:0008241//peptidyl-dipeptidase activity;GO:0031711//bradykinin receptor binding;GO:0003779//actin binding;GO:0008237//metallopeptidase activity	GO:0005615//extracellular space;GO:0009897//external side of plasma membrane;GO:0005768//endosome	--
Unigene24137_sinensis	2105	93	672	7.9311	68.6961	3.11463531820437	Up	1.639162e-133	3.34893775302053e-131	gi|225542774|gb|ACN91270.1|	57.4	3e-06	dentin sialophosphoprotein precursor [Dasypus novemcinctus]	--	--	--	--	--	--	--	--	HI0533	50.8	9e-06	COG0568	DNA-directed RNA polymerase, sigma subunit (sigma70/sigma32)	--	--	--	--	--	-	-	-	--
Unigene34115_sinensis	3198	291	2102	16.3349	141.4390	3.11415045182013	Up	0	0	gi|405957005|gb|EKC23244.1|	156.8	7e-36	hypothetical protein CGI_10020924 [Crassostrea gigas]	gi|156361012|ref|XM_001625266.1|	71.9	2e-08	Nematostella vectensis predicted protein (NEMVEDRAFT_v1g216927) partial mRNA	sp|Q6P1E8|EFCB6_MOUSE	52.4	6e-06	EF-hand calcium-binding domain-containing protein 6 OS=Mus musculus GN=Efcab6 PE=1 SV=2	--	--	--	--	--	--	--	--	--	--	-	GO:0005488//binding	-	--
CL1452.Contig4_sinensis	4059	18	130	0.7961	6.8919	3.11388020092371	Up	4.29944e-27	2.56015115692308e-25	gi|405978558|gb|EKC42938.1|	320.5	4e-85	Laminin subunit alpha-2 [Crassostrea gigas]	--	--	--	--	sp|Q03410|SYCP1_RAT	262	4e-69	Synaptonemal complex protein 1 OS=Rattus norvegicus GN=Sycp1 PE=2 SV=2	MJ1643	125	6e-28	COG1196	Chromosome segregation ATPases	K12478	6e-44	181	mdo:100015221	early endosome antigen 1	GO:0007049//cell cycle	-	GO:0000795//synaptonemal complex	--
CL6521.Contig1_sinensis	3110	32	231	1.8471	15.9833	3.1132314262709	Up	5.76616e-47	5.18351743277419e-45	gi|405969114|gb|EKC34120.1|	267.7	2e-69	Thioredoxin domain-containing protein 3-like protein [Crassostrea gigas]	--	--	--	--	sp|P90666|TXND3_HELCR	676	0.0	Thioredoxin domain-containing protein 3 homolog OS=Heliocidaris crassispina GN=NME8 PE=1 SV=1	aq_1590	108	4e-23	COG0105	Nucleoside diphosphate kinase	K00940	3e-46	188	tad:TRIADDRAFT_51403	nucleoside-diphosphate kinase [EC:2.7.4.6]	GO:0009201;GO:0042455;GO:0044699;GO:0009260	-	-	--
Unigene6409_sinensis	1140	5	36	0.7873	6.7954	3.10957309201616	Up	2.00654e-08	4.65048686826347e-07	gi|156405110|ref|XP_001640575.1|	100.9	1e-19	predicted protein [Nematostella vectensis] >gi|156227710|gb|EDO48512.1| predicted protein [Nematostella vectensis]	--	--	--	--	sp|Q80WQ8|M18BP_MOUSE	66.2	1e-10	Mis18-binding protein 1 OS=Mus musculus GN=Mis18bp1 PE=1 SV=1	--	--	--	--	--	--	--	--	--	--	-	-	-	--
Unigene34005_sinensis	1312	5	36	0.6841	5.9045	3.10953576054831	Up	2.00654e-08	4.65358306458056e-07	gi|260813749|ref|XP_002601579.1|	80.9	1e-13	hypothetical protein BRAFLDRAFT_110423 [Branchiostoma floridae] >gi|229286877|gb|EEN57591.1| hypothetical protein BRAFLDRAFT_110423 [Branchiostoma floridae]	--	--	--	--	sp|Q9D4I2|MEII1_MOUSE	55.1	3e-07	Meiosis inhibitor protein 1 OS=Mus musculus GN=Mei1 PE=2 SV=3	--	--	--	--	--	--	--	--	--	--	-	-	-	--
Unigene11449_sinensis	1218	15	108	2.2108	19.0806	3.10946611562134	Up	1.015594e-22	5.2960642504491e-21	--	--	--	--	--	--	--	--	--	--	--	--	--	--	--	--	--	--	--	--	--	--	-	-	-	--
CL4233.Contig2_sinensis	1813	5	36	0.4951	4.2729	3.10942369916324	Up	2.00654e-08	4.65203445124792e-07	gi|383858439|ref|XP_003704709.1|	205.7	6e-51	PREDICTED: E3 ubiquitin-protein ligase highwire-like [Megachile rotundata]	gi|61740953|gb|AC158989.1|	69.9	4e-08	Mus musculus BAC clone RP23-399H20 from chromosome 3, complete sequence	sp|O75592|MYCB2_HUMAN	194	5e-49	Probable E3 ubiquitin-protein ligase MYCBP2 OS=Homo sapiens GN=MYCBP2 PE=1 SV=3	Ta1105	88.6	3e-17	COG2110	Predicted phosphatase homologous to the C-terminal domain of histone macroH2A1	K10693	2e-49	197	bfo:BRAFLDRAFT_81492	E3 ubiquitin-protein ligase MYCBP2 [EC:6.3.2.19]	-	-	-	--
CL1733.Contig2_sinensis	1157	143	1027	22.1873	191.0082	3.10582855464067	Up	1.666176e-202	5.27640071563636e-200	gi|440896894|gb|ELR48697.1|	116.3	3e-24	hypothetical protein M91_21220 [Bos grunniens mutus]	--	--	--	--	sp|Q8NHV1|GIMA7_HUMAN	105	2e-22	GTPase IMAP family member 7 OS=Homo sapiens GN=GIMAP7 PE=2 SV=1	--	--	--	--	--	K05305	2e-09	64.3	dre:100150934	fucokinase [EC:2.7.1.52]	-	-	-	--
Unigene27525_sinensis	1894	435	3122	41.2298	354.7055	3.10486233257415	Up	0	0	gi|405963183|gb|EKC28780.1|	633.3	1e-179	hypothetical protein CGI_10018075 [Crassostrea gigas]	--	--	--	--	sp|Q4V7B5|CC105_RAT	161	5e-39	Coiled-coil domain-containing protein 105 OS=Rattus norvegicus GN=Ccdc105 PE=2 SV=1	--	--	--	--	--	K10352	1e-06	55.8	cel:F52B10.1	myosin heavy chain	-	-	-	--
Unigene36753_sinensis	1093	23	165	3.7775	32.4847	3.10425672128584	Up	6.83352e-34	4.78476889326633e-32	gi|405972406|gb|EKC37178.1|	251.5	5e-65	HEAT repeat-containing protein 4 [Crassostrea gigas]	--	--	--	--	--	--	--	--	--	--	--	--	--	--	--	--	--	--	-	-	-	--
CL6314.Contig1_sinensis	2966	335	2402	20.2757	174.2677	3.10348156686357	Up	0	0	gi|405951139|gb|EKC19078.1|	198.7	1e-48	Low-density lipoprotein receptor-related protein 1B [Crassostrea gigas]	--	--	--	--	sp|G5EFX6|SLIT1_CAEEL	99.8	3e-20	Slit homolog 1 protein OS=Caenorhabditis elegans GN=slt-1 PE=3 SV=1	--	--	--	--	--	K04550	3e-23	111	aag:AaeL_AAEL007041	low density lipoprotein-related protein 1 (alpha-2-macroglobulin receptor)	-	-	-	--
Unigene37266_sinensis	513	6	43	2.0996	18.0371	3.10278099335054	Up	8.24322e-10	2.21053461963048e-08	--	--	--	--	--	--	--	--	--	--	--	--	--	--	--	--	--	--	--	--	--	--	-	-	-	--
Unigene30636_sinensis	1131	12	86	1.9047	16.3625	3.10275750330004	Up	2.44708e-18	1.06553510325e-16	--	--	--	--	--	--	--	--	--	--	--	--	--	--	--	--	--	--	--	--	--	--	-	-	-	--
CL2586.Contig1_sinensis	2308	12	86	0.9334	8.0182	3.10271103103178	Up	2.44708e-18	1.06620147917448e-16	gi|405957723|gb|EKC23913.1|	489.6	3e-136	Ankyrin repeat domain-containing protein 60 [Crassostrea gigas]	--	--	--	--	sp|Q9BZ19|ANR60_HUMAN	167	9e-41	Ankyrin repeat domain-containing protein 60 OS=Homo sapiens GN=ANKRD60 PE=2 SV=3	all2748	59.3	3e-08	COG0666	FOG: Ankyrin repeat	K10380	2e-13	79.0	phu:Phum_PHUM596790	ankyrin	-	-	-	--
Unigene3364_sinensis	3975	159	1139	7.1806	61.6597	3.10215156655465	Up	4.04932e-224	1.4105603754e-221	gi|225542782|gb|ACN91274.1|	60.5	8e-07	dentin sialophosphoprotein precursor [Pan troglodytes]	--	--	--	--	--	--	--	--	--	--	--	--	--	--	--	--	--	--	-	-	-	--
Unigene16734_sinensis	1486	143	1022	17.2750	147.9950	3.0987908196074	Up	4.4617e-201	1.40018998783784e-198	gi|66811778|ref|XP_640068.1|	57.0	3e-06	hypothetical protein DDB_G0282471 [Dictyostelium discoideum AX4] >gi|60468085|gb|EAL66095.1| hypothetical protein DDB_G0282471 [Dictyostelium discoideum AX4]	--	--	--	--	--	--	--	--	--	--	--	--	--	--	--	--	--	--	-	-	-	--
CL2516.Contig3_sinensis	2006	41	293	3.6691	31.4305	3.0986670925084	Up	7.06632e-59	7.36981209700599e-57	gi|405975833|gb|EKC40375.1|	127.9	2e-27	Doublecortin domain-containing protein 2 [Crassostrea gigas]	--	--	--	--	sp|D3ZR10|DCDC2_RAT	61.6	6e-09	Doublecortin domain-containing protein 2 OS=Rattus norvegicus GN=Dcdc2 PE=2 SV=1	--	--	--	--	--	--	--	--	--	--	-	-	-	--
Unigene10278_sinensis	1062	7	50	1.1832	10.1312	3.09803920303811	Up	3.42832e-11	1.03442020822867e-09	--	--	--	--	--	--	--	--	--	--	--	--	--	--	--	--	--	--	--	--	--	--	-	-	-	--
Unigene3705_sinensis	2043	28	200	2.4603	21.0657	3.09798970817844	Up	1.110552e-40	8.90345768561565e-39	gi|405973233|gb|EKC37957.1|	720.7	0.0	hypothetical protein CGI_10025533 [Crassostrea gigas]	--	--	--	--	sp|C9JQI7|TM232_HUMAN	99.0	4e-20	Transmembrane protein 232 OS=Homo sapiens GN=TMEM232 PE=2 SV=2	--	--	--	--	--	K15185	5e-06	53.9	mdo:100015863	AF4/FMR2 family member 4	-	-	-	--
CL3059.Contig1_sinensis	288	14	100	8.7264	74.7175	3.09798767371873	Up	4.5436e-21	2.23235591255289e-19	--	--	--	--	--	--	--	--	--	--	--	--	--	--	--	--	--	--	--	--	--	--	-	-	-	--
CL2031.Contig1_sinensis	2843	21	150	1.3260	11.3535	3.09798443230603	Up	6.90364e-31	4.54602736446125e-29	gi|405978098|gb|EKC42512.1|	267.3	3e-69	hypothetical protein CGI_10020537 [Crassostrea gigas]	--	--	--	--	sp|Q869E1|DNLI1_DICDI	80.9	1e-14	DNA ligase 1 OS=Dictyostelium discoideum GN=lig1 PE=3 SV=1	YLR106c	55.1	7e-07	COG5271	AAA ATPase containing von Willebrand factor type A (vWA) domain	K03243	5e-15	84.3	tad:TRIADDRAFT_61546	translation initiation factor 5B	-	-	-	--
Unigene27036_sinensis	1168	42	300	6.4552	55.2705	3.09797596380094	Up	3.12286e-60	3.32670540275229e-58	gi|405964813|gb|EKC30258.1|	187.6	1e-45	Coiled-coil domain-containing protein 92 [Crassostrea gigas]	--	--	--	--	sp|Q53HC0|CCD92_HUMAN	108	3e-23	Coiled-coil domain-containing protein 92 OS=Homo sapiens GN=CCDC92 PE=1 SV=2	--	--	--	--	--	--	--	--	--	--	-	-	-	--
Unigene30881_sinensis	1125	45	321	7.1806	61.3999	3.09606000232924	Up	2.69958e-64	2.99485730923567e-62	gi|405977461|gb|EKC41912.1|	518.1	3e-145	hypothetical protein CGI_10013927 [Crassostrea gigas]	--	--	--	--	sp|Q3KQ80|STPG1_XENLA	275	1e-73	O(6)-methylguanine-induced apoptosis 2 OS=Xenopus laevis GN=stpg1 PE=2 SV=1	--	--	--	--	--	--	--	--	--	--	-	-	-	--
Unigene753_sinensis	3397	15	107	0.7927	6.7780	3.09601275531452	Up	1.965138e-22	1.01039999499631e-20	gi|291240463|ref|XP_002740140.1|	196.8	6e-48	PREDICTED: predicted protein-like, partial [Saccoglossus kowalevskii]	--	--	--	--	sp|P37709|TRHY_RABIT	177	1e-43	Trichohyalin OS=Oryctolagus cuniculus GN=TCHH PE=2 SV=1	MK0690	86.3	3e-16	COG0419	ATPase involved in DNA repair	K10388	3e-37	158	dre:567310	plectin	-	-	-	--
CL284.Contig1_sinensis	2900	46	328	2.8475	24.3383	3.09546065406961	Up	1.19422e-65	1.36170398003273e-63	gi|405951115|gb|EKC19056.1|	1130.9	0.0	Dynein intermediate chain 2, ciliary [Crassostrea gigas]	gi|291225617|ref|XM_002732752.1|	89.7	7e-14	PREDICTED: Saccoglossus kowalevskii Dynein intermediate chain 2, ciliary-like (LOC100368022), mRNA	sp|Q16959|DYI2_HELCR	964	0.0	Dynein intermediate chain 2, ciliary OS=Heliocidaris crassispina PE=2 SV=1	--	--	--	--	--	K10409	0.0	948	cin:778840	dynein intermediate chain 1, axonemal	GO:0003351//epithelial cilium movement	GO:0005515//protein binding	GO:0005737//cytoplasm;GO:0043234//protein complex;GO:0005929//cilium;GO:0044430//cytoskeletal part;GO:0015630//microtubule cytoskeleton	--
Unigene9498_sinensis	2923	40	285	2.4566	20.9812	3.09436232115625	Up	3.08782e-57	3.14971202898975e-55	gi|405966883|gb|EKC32115.1|	1159.4	0.0	Radial spoke head 10-like protein B2 [Crassostrea gigas]	--	--	--	--	sp|Q1JPG1|RS10B_BOVIN	610	7e-174	Radial spoke head 10 homolog B OS=Bos taurus GN=RSPH10B PE=2 SV=2	slr1485	125	5e-28	COG4642	Uncharacterized protein conserved in bacteria	K04575	4e-23	111	tca:100142202	amyotrophic lateral sclerosis 2 (juvenile)	-	-	-	--
CL1249.Contig2_sinensis	3396	24	171	1.2687	10.8354	3.09432954168139	Up	5.78422e-35	4.158728825387e-33	gi|405973279|gb|EKC38002.1|	133.7	7e-29	Transcription factor Sox-8 [Crassostrea gigas]	--	--	--	--	sp|Q8CGW4|SOX30_MOUSE	102	8e-21	Transcription factor SOX-30 OS=Mus musculus GN=Sox30 PE=2 SV=1	--	--	--	--	--	K09271	3e-21	105	mgp:100544570	transcription factor SOX, other	GO:0006357//regulation of transcription from RNA polymerase II promoter;GO:0031960//response to corticosteroid stimulus	GO:0000981//sequence-specific DNA binding RNA polymerase II transcription factor activity;GO:0043565//sequence-specific DNA binding	GO:0005634//nucleus	--
Unigene16774_sinensis	522	17	121	5.8463	49.8804	3.09287726710759	Up	3.698e-25	2.08950496350365e-23	gi|405964353|gb|EKC29850.1|	99.8	6e-20	Uncharacterized protein C3orf30 [Crassostrea gigas]	--	--	--	--	sp|Q96M34|CC030_HUMAN	58.2	1e-08	Uncharacterized protein C3orf30 OS=Homo sapiens GN=C3orf30 PE=2 SV=2	--	--	--	--	--	--	--	--	--	--	-	-	-	--
CL3928.Contig1_sinensis	3968	17	121	0.7691	6.5619	3.09287051034927	Up	3.698e-25	2.09120099025974e-23	gi|443692457|gb|ELT94050.1|	619.4	5e-175	hypothetical protein CAPTEDRAFT_214021 [Capitella teleta]	--	--	--	--	sp|Q8IWY9|CDAN1_HUMAN	472	3e-132	Codanin-1 OS=Homo sapiens GN=CDAN1 PE=1 SV=4	--	--	--	--	--	--	--	--	--	--	-	-	-	--
CL3841.Contig7_sinensis	2455	9	64	0.6581	5.6097	3.0915448923241	Up	6.08276e-14	2.14789562311201e-12	gi|405973393|gb|EKC38111.1|	537.3	1e-150	Neurogenic locus Notch protein [Crassostrea gigas]	--	--	--	--	sp|Q7L0X2|F194A_HUMAN	179	2e-44	Protein FAM194A OS=Homo sapiens GN=FAM194A PE=2 SV=1	--	--	--	--	--	--	--	--	--	--	-	-	-	--
CL3956.Contig5_sinensis	989	67	476	12.1613	103.5680	3.09020895295901	Up	2.34934e-94	3.51991760129032e-92	gi|357017841|ref|YP_004934871.1|	424.5	4e-117	ND1 gene product (mitochondrion) [Meretrix lamarckii] >gi|261888502|gb|ACY06180.1| NADH dehydrogenase subunit 1 (mitochondrion) [Meretrix lamarckii]	gi|157394624|gb|EU145977.1|	287	5e-74	Meretrix petechialis mitochondrion, complete genome	sp|O47479|NU1M_LOLBL	217	4e-56	NADH-ubiquinone oxidoreductase chain 1 OS=Loligo bleekeri GN=ND1 PE=3 SV=1	RC1230	193	3e-49	COG1005	NADH:ubiquinone oxidoreductase subunit 1 (chain H)	K03878	4e-56	218	tca:803824	NADH-ubiquinone oxidoreductase chain 1 [EC:1.6.5.3]	GO:0055114//oxidation-reduction process	GO:0008137//NADH dehydrogenase (ubiquinone) activity	GO:0016021//integral to membrane;GO:0005739//mitochondrion	--
Unigene26984_sinensis	1019	21	149	3.6995	31.4650	3.08834573901913	Up	1.333714e-30	8.68397389401869e-29	--	--	--	--	--	--	--	--	--	--	--	--	--	--	--	--	--	--	--	--	--	--	-	-	-	--
CL3686.Contig2_sinensis	2179	32	227	2.6363	22.4173	3.08802606902039	Up	8.02956e-46	7.08115716e-44	gi|405976259|gb|EKC40772.1|	762.3	0.0	Serine/threonine-protein kinase MAK [Crassostrea gigas]	gi|462887034|gb|GAFZ01197511.1|	93.7	3e-15	TSA: Anolis carolinensis comp13617_c0_seq3 transcribed RNA sequence	sp|Q9UPZ9|ICK_HUMAN	568	2e-161	Serine/threonine-protein kinase ICK OS=Homo sapiens GN=ICK PE=1 SV=1	SPAC1687.15	179	2e-44	COG0515	Serine/threonine protein kinase	K08829	1e-165	583	mdo:100019665	male germ cell-associated kinase [EC:2.7.11.22]	-	-	-	--
CL4629.Contig2_sinensis	687	11	78	2.8743	24.4317	3.08747169879691	Up	1.104416e-16	4.47606505549738e-15	gi|119584581|gb|EAW64177.1|	53.9	7e-06	hCG2042888, isoform CRA_a [Homo sapiens] >gi|119584582|gb|EAW64178.1| hCG2042888, isoform CRA_a [Homo sapiens] >gi|119584583|gb|EAW64179.1| hCG2042888, isoform CRA_a [Homo sapiens]	--	--	--	--	sp|Q17RH7|TPRXL_HUMAN	52.4	9e-07	Putative protein TPRXL OS=Homo sapiens GN=TPRXL PE=5 SV=2	--	--	--	--	--	--	--	--	--	--	-	-	-	--
Unigene26740_sinensis	1275	33	234	4.6463	39.4930	3.08744274967089	Up	3.53646e-47	3.2039223893368e-45	gi|256549334|gb|ACU83221.1|	630.2	7e-179	heat shock protein 40A [Ruditapes philippinarum]	gi|256549333|gb|GQ384397.1|	745	0.0	Venerupis philippinarum heat shock protein 40A mRNA, complete cds	sp|Q80Y75|DJB13_MOUSE	420	4e-117	DnaJ homolog subfamily B member 13 OS=Mus musculus GN=Dnajb13 PE=2 SV=1	SPBC1734.11	174	4e-43	COG0484	DnaJ-class molecular chaperone with C-terminal Zn finger domain	K09519	2e-140	499	bfo:BRAFLDRAFT_114430	DnaJ homolog subfamily B member 13	GO:0006457//protein folding;GO:0006950//response to stress	GO:0051082//unfolded protein binding	-	--
CL284.Contig2_sinensis	2915	45	319	2.7712	23.5487	3.08706467813326	Up	1.005074e-63	1.10098271235849e-61	gi|405951115|gb|EKC19056.1|	1124.4	0.0	Dynein intermediate chain 2, ciliary [Crassostrea gigas]	gi|291225617|ref|XM_002732752.1|	89.7	7e-14	PREDICTED: Saccoglossus kowalevskii Dynein intermediate chain 2, ciliary-like (LOC100368022), mRNA	sp|Q16959|DYI2_HELCR	964	0.0	Dynein intermediate chain 2, ciliary OS=Heliocidaris crassispina PE=2 SV=1	--	--	--	--	--	K10409	0.0	945	cin:778840	dynein intermediate chain 1, axonemal	GO:0003351//epithelial cilium movement	-	GO:0043234//protein complex;GO:0044430//cytoskeletal part;GO:0015630//microtubule cytoskeleton;GO:0042995//cell projection	--
Unigene37361_sinensis	3923	499	3536	22.8341	193.9586	3.08648691295408	Up	0	0	gi|405971896|gb|EKC36699.1|	166.8	8e-39	hypothetical protein CGI_10010967 [Crassostrea gigas]	--	--	--	--	sp|Q8BL66|EEA1_MOUSE	92.0	9e-18	Early endosome antigen 1 OS=Mus musculus GN=Eea1 PE=1 SV=2	SP0117	83.2	3e-15	COG5263	FOG: Glucan-binding domain (YG repeat)	K12478	3e-17	92.0	mmu:216238	early endosome antigen 1	-	GO:0005488//binding	GO:0044444//cytoplasmic part	--
CL9907.Contig1_sinensis	2703	13	92	0.8634	7.3241	3.08455049127338	Up	2.03668e-19	9.31670774261326e-18	gi|443713221|gb|ELU06186.1|	516.2	3e-144	hypothetical protein CAPTEDRAFT_181233 [Capitella teleta]	--	--	--	--	sp|Q9H0I3|CC113_HUMAN	292	3e-78	Coiled-coil domain-containing protein 113 OS=Homo sapiens GN=CCDC113 PE=2 SV=1	aq_629	58.9	4e-08	COG1196	Chromosome segregation ATPases	K10362	6e-09	63.9	nvi:100121154	myosin XVIII	-	-	GO:0005730//nucleolus;GO:0005737//cytoplasm;GO:0043234//protein complex	--
Unigene33911_sinensis	1335	126	891	16.9430	143.6188	3.08348336115636	Up	1.098746e-174	2.96699748348837e-172	gi|405975682|gb|EKC40232.1|	250.8	1e-64	hypothetical protein CGI_10011062 [Crassostrea gigas]	--	--	--	--	--	--	--	--	--	--	--	--	--	--	--	--	--	--	-	-	-	--
CL2805.Contig1_sinensis	3104	84	593	4.8580	41.1100	3.08105497681544	Up	8.90948e-117	1.6122456158961e-114	gi|405963143|gb|EKC28743.1|	244.2	3e-62	Uncharacterized protein C7orf63 [Crassostrea gigas]	gi|260829512|ref|XM_002609660.1|	77.8	3e-10	Branchiostoma floridae hypothetical protein, mRNA	sp|B0VXE6|CG063_CALJA	848	0.0	Uncharacterized protein C7orf63 OS=Callithrix jacchus PE=4 SV=1	--	--	--	--	--	--	--	--	--	--	-	-	-	--
Unigene36404_sinensis	3054	65	458	3.8207	32.2709	3.07832492621237	Up	1.64738e-90	2.40610727924528e-88	gi|147904116|ref|NP_001079647.1|	72.0	2e-10	serine/arginine-rich splicing factor 6 [Xenopus laevis] >gi|28436899|gb|AAH46668.1| MGC52985 protein [Xenopus laevis]	--	--	--	--	sp|Q8VE97|SRSF4_MOUSE	63.9	2e-09	Serine/arginine-rich splicing factor 4 OS=Mus musculus GN=Srsf4 PE=2 SV=1	--	--	--	--	--	K12893	3e-11	72.0	xla:379334	splicing factor, arginine/serine-rich 4/5/6	-	-	-	--
CL6072.Contig1_sinensis	1473	94	662	11.4558	96.7097	3.07758238874715	Up	5.18302e-130	1.03465851111748e-127	--	--	--	--	--	--	--	--	--	--	--	--	--	--	--	--	--	--	--	--	--	--	-	-	-	--
Unigene29405_sinensis	2135	207	1457	17.4050	146.8509	3.07677838831051	Up	7.98646e-284	3.68482570688742e-281	gi|405959203|gb|EKC25262.1|	523.1	2e-146	Kelch-like protein 13 [Crassostrea gigas]	--	--	--	--	sp|Q9H511|KLH31_HUMAN	314	4e-85	Kelch-like protein 31 OS=Homo sapiens GN=KLHL31 PE=2 SV=1	--	--	--	--	--	K10467	2e-86	320	mdo:100014419	kelch-like protein 31	-	-	-	--
Unigene27728_sinensis	2697	337	2372	22.4311	189.2556	3.07676371395433	Up	0	0	gi|405951454|gb|EKC19365.1|	426.8	3e-117	Outer dense fiber protein 3 [Crassostrea gigas]	gi|226483486|emb|FN318315.1|	63.9	4e-06	Schistosoma japonicum isolate Anhui full length mRNA clone SJFCE2459.001|FSE001-P00034-H06, complete sequence	sp|Q5EB30|ODF3A_XENTR	282	3e-75	Outer dense fiber protein 3 OS=Xenopus tropicalis GN=odf3 PE=2 SV=1	YDL140c	52.8	3e-06	COG0086	DNA-directed RNA polymerase, beta' subunit/160 kD subunit	K03006	9e-06	53.5	acs:100561860	DNA-directed RNA polymerase II subunit RPB1 [EC:2.7.7.6]	-	-	-	--
Unigene29568_sinensis	1314	167	1173	22.8151	192.0957	3.07376434277186	Up	1.176122e-228	4.20201249323077e-226	gi|426342715|ref|XP_004037980.1|	67.8	1e-09	PREDICTED: tripartite motif-containing protein 59 isoform 2 [Gorilla gorilla gorilla]	--	--	--	--	sp|Q8IWR1|TRI59_HUMAN	67.0	9e-11	Tripartite motif-containing protein 59 OS=Homo sapiens GN=TRIM59 PE=2 SV=1	--	--	--	--	--	K12028	2e-10	67.4	mcc:704829	tripartite motif-containing protein 59	-	-	-	--
Unigene20560_sinensis	1312	175	1229	23.9445	201.5733	3.07353833977726	Up	1.834856e-239	7.02376827824176e-237	gi|405976531|gb|EKC41035.1|	359.8	1e-97	hypothetical protein CGI_10008521 [Crassostrea gigas]	gi|410812242|gb|JX104116.1|	111	9e-21	Scrobicularia plana hypothetical protein mRNA, partial cds	sp|A2BFC9|YI011_DANRE	167	6e-41	Uncharacterized protein FLJ46082 homolog OS=Danio rerio GN=si:ch211-215c18.4 PE=4 SV=1	--	--	--	--	--	--	--	--	--	--	-	-	-	--
Unigene4281_sinensis	991	3	21	0.5434	4.5600	3.06894735371749	Up	2.46956e-05	0.000367239649178228	gi|334331219|ref|XP_001365512.2|	142.1	4e-32	PREDICTED: hypothetical protein LOC100011548 [Monodelphis domestica]	--	--	--	--	sp|Q6ZU11|YD002_HUMAN	131	2e-30	Uncharacterized protein FLJ44066 OS=Homo sapiens PE=2 SV=1	--	--	--	--	--	K03165	8e-10	65.1	cqu:CpipJ_CPIJ006288	DNA topoisomerase III [EC:5.99.1.2]	-	-	-	--
CL386.Contig1_sinensis	1589	3	21	0.3389	2.8439	3.0689391944572	Up	2.46956e-05	0.000367082943545978	gi|443714276|gb|ELU06760.1|	85.9	1e-114	hypothetical protein CAPTEDRAFT_221626 [Capitella teleta]	--	--	--	--	sp|A9UMP7|ENO4_XENLA	226	7e-66	Enolase-like protein ENO4 OS=Xenopus laevis GN=eno4 PE=2 SV=2	aq_484	152	1e-36	COG0148	Enolase	K01689	8e-100	318	spu:583138	enolase [EC:4.2.1.11]	-	-	-	--
CL8135.Contig1_sinensis	2202	5	35	0.4076	3.4203	3.06889691514117	Up	3.89884e-08	8.77352338372093e-07	gi|405974269|gb|EKC38928.1|	60.5	4e-07	Acyl-CoA-binding domain-containing protein 4 [Crassostrea gigas]	--	--	--	--	sp|Q4V8F4|RABEK_RAT	130	2e-29	Rab9 effector protein with kelch motifs OS=Rattus norvegicus GN=Rabepk PE=2 SV=1	SPAC140.02	75.5	4e-13	COG0724	RNA-binding proteins (RRM domain)	K10317	3e-23	111	nve:NEMVE_v1g100198	F-box protein 42	-	-	-	--
Unigene3459_sinensis	1394	7	49	0.9014	7.5639	3.06889093481958	Up	6.6439e-11	1.96132995381356e-09	gi|405950324|gb|EKC18319.1|	315.8	3e-84	Tetratricopeptide repeat protein 6 [Crassostrea gigas]	--	--	--	--	--	--	--	--	--	--	--	--	--	--	--	--	--	--	-	-	-	--
Unigene10435_sinensis	1468	6	42	0.7337	6.1566	3.06887164809337	Up	1.59927e-09	4.16989302507485e-08	gi|143346991|gb|ABO93208.1|	503.1	1e-140	Elav [Platynereis dumerilii]	gi|194764022|ref|XM_001964095.1|	115	6e-22	Drosophila ananassae GF21392 (Dana\GF21392), mRNA	sp|O09032|ELAV4_RAT	419	6e-117	ELAV-like protein 4 OS=Rattus norvegicus GN=Elavl4 PE=1 SV=1	YCL011c	76.6	1e-13	COG0724	RNA-binding proteins (RRM domain)	K13208	1e-135	483	nvi:100119488	ELAV like protein 2/3/4	-	GO:0000166//nucleotide binding;GO:0003723//RNA binding	-	--
CL8052.Contig1_sinensis	1626	4	28	0.4416	3.7055	3.06885614785324	Up	9.67778e-07	1.81442748875135e-05	gi|291230360|ref|XP_002735134.1|	152.5	6e-35	PREDICTED: spindle and KT associated 1-like [Saccoglossus kowalevskii]	--	--	--	--	sp|Q6DHG8|SKA1_DANRE	141	5e-33	Spindle and kinetochore-associated protein 1 OS=Danio rerio GN=ska1 PE=2 SV=1	--	--	--	--	--	--	--	--	--	--	GO:0044763	-	GO:0043234//protein complex;GO:0044430//cytoskeletal part;GO:0000775//chromosome, centromeric region;GO:0015630//microtubule cytoskeleton	--
CL7349.Contig1_sinensis	1896	10	70	0.9468	7.9446	3.06884297244858	Up	5.00094e-15	1.8772116856681e-13	gi|390337836|ref|XP_003724653.1|	336.6	2e-90	PREDICTED: MCM domain-containing protein C8orf45 homolog [Strongylocentrotus purpuratus]	--	--	--	--	sp|Q5XI14|MCMD2_RAT	229	1e-59	MCM domain-containing protein 2 OS=Rattus norvegicus GN=Mcmdc2 PE=2 SV=1	APE0188	77.0	1e-13	COG1241	Predicted ATPase involved in replication control, Cdc46/Mcm family	K10738	2e-12	74.7	tad:TRIADDRAFT_31981	minichromosome maintenance protein 9	-	-	-	--
Unigene29845_sinensis	618	4	28	1.1619	9.7495	3.06884232540402	Up	9.67778e-07	1.81393934576271e-05	--	--	--	--	--	--	--	--	--	--	--	--	--	--	--	--	--	--	--	--	--	--	-	-	-	--
Unigene16830_sinensis	879	4	28	0.8169	6.8546	3.06884109181472	Up	9.67778e-07	1.81345146535772e-05	gi|405958489|gb|EKC24616.1|	243.4	1e-62	Aquaporin-1 [Crassostrea gigas]	--	--	--	--	sp|O62735|AQP2_SHEEP	193	4e-49	Aquaporin-2 OS=Ovis aries GN=AQP2 PE=2 SV=1	SMc01870	122	8e-28	COG0580	Glycerol uptake facilitator and related permeases (Major Intrinsic Protein Family)	K09866	5e-53	208	dre:445293	aquaporin-4	-	GO:0005372//water transmembrane transporter activity	-	--
CL6513.Contig1_sinensis	512	7	49	2.4543	20.5940	3.06884056184222	Up	6.6439e-11	1.96216137812632e-09	--	--	--	--	--	--	--	--	--	--	--	--	--	--	--	--	--	--	--	--	--	--	-	-	-	--
Unigene36960_sinensis	382	8	56	3.7595	31.5457	3.06883065807715	Up	2.78624e-12	8.97847153376503e-11	--	--	--	--	--	--	--	--	--	--	--	--	--	--	--	--	--	--	--	--	--	--	-	-	-	--
Unigene615_sinensis	732	10	70	2.4524	20.5779	3.06882954606883	Up	5.00094e-15	1.87519100570506e-13	gi|405955335|gb|EKC22490.1|	183.3	9e-45	hypothetical protein CGI_10002180 [Crassostrea gigas]	--	--	--	--	sp|Q9D581|EFC10_MOUSE	90.5	3e-18	EF-hand calcium-binding domain-containing protein 10 OS=Mus musculus GN=Efcab10 PE=2 SV=1	--	--	--	--	--	--	--	--	--	--	-	-	-	--
CL2689.Contig2_sinensis	1726	14	98	1.4561	12.2180	3.06882680208622	Up	1.696488e-20	8.11762516978022e-19	gi|156388027|ref|XP_001634503.1|	66.2	6e-09	predicted protein [Nematostella vectensis] >gi|156221587|gb|EDO42440.1| predicted protein [Nematostella vectensis]	--	--	--	--	sp|B3MNR6|HOOK_DROAN	55.5	4e-07	Protein hook OS=Drosophila ananassae GN=hk PE=3 SV=1	--	--	--	--	--	--	--	--	--	--	-	-	-	--
Unigene3735_sinensis	836	6	42	1.2884	10.8108	3.06882081561665	Up	1.59927e-09	4.17301654044944e-08	--	--	--	--	--	--	--	--	--	--	--	--	--	--	--	--	--	--	--	--	--	--	-	-	-	--
CL2266.Contig2_sinensis	1503	5	35	0.5972	5.0110	3.0688124671824	Up	3.89884e-08	8.77635812471729e-07	gi|405963610|gb|EKC29172.1|	329.3	3e-88	Heat shock 70 kDa protein 12A [Crassostrea gigas]	--	--	--	--	sp|O43301|HS12A_HUMAN	204	5e-52	Heat shock 70 kDa protein 12A OS=Homo sapiens GN=HSPA12A PE=1 SV=2	Cj0759	60.8	6e-09	COG0443	Molecular chaperone	--	--	--	--	--	-	-	-	--
CL10289.Contig2_sinensis	1731	13	91	1.3482	11.3125	3.06881135673159	Up	3.93426e-19	1.77868890292018e-17	--	--	--	--	--	--	--	--	--	--	--	--	--	--	--	--	--	--	--	--	--	--	-	-	-	--
CL3893.Contig3_sinensis	763	10	70	2.3528	19.7419	3.06881024988651	Up	5.00094e-15	1.87620080161551e-13	--	--	--	--	--	--	--	--	--	--	--	--	--	--	--	--	--	--	--	--	--	--	-	-	-	--
Unigene10917_sinensis	750	3	21	0.7181	6.0252	3.06875246321287	Up	2.46956e-05	0.000367161279641485	gi|443723946|gb|ELU12164.1|	245.4	2e-63	hypothetical protein CAPTEDRAFT_158550 [Capitella teleta]	gi|390370929|ref|XM_003731880.1|	65.9	3e-07	PREDICTED: Strongylocentrotus purpuratus uncharacterized LOC581379 (LOC581379), mRNA	sp|Q9NQM4|PIHD3_HUMAN	143	4e-34	Protein PIH1D3 OS=Homo sapiens GN=PIH1D3 PE=2 SV=1	--	--	--	--	--	--	--	--	--	--	-	-	-	--
CL5134.Contig1_sinensis	3054	6	42	0.3527	2.9593	3.06874247674779	Up	1.59927e-09	4.17145419805316e-08	gi|260801229|ref|XP_002595498.1|	703.7	0.0	hypothetical protein BRAFLDRAFT_118966 [Branchiostoma floridae] >gi|229280745|gb|EEN51510.1| hypothetical protein BRAFLDRAFT_118966 [Branchiostoma floridae]	--	--	--	--	sp|Q8N5R6|CCD33_HUMAN	251	7e-66	Coiled-coil domain-containing protein 33 OS=Homo sapiens GN=CCDC33 PE=1 SV=3	YLR086w	57.8	1e-07	COG1196	Chromosome segregation ATPases	K15032	6e-54	213	xtr:100145192	mTERF domain-containing protein, mitochondrial	-	-	-	--
Unigene24905_sinensis	2857	348	2435	21.8661	183.4019	3.06824075315115	Up	0	0	gi|260798879|ref|XP_002594427.1|	218.4	1e-54	hypothetical protein BRAFLDRAFT_119957 [Branchiostoma floridae] >gi|229279661|gb|EEN50438.1| hypothetical protein BRAFLDRAFT_119957 [Branchiostoma floridae]	--	--	--	--	sp|Q2T9Z7|KLHL9_BOVIN	179	2e-44	Kelch-like protein 9 OS=Bos taurus GN=KLHL9 PE=2 SV=1	--	--	--	--	--	K10447	1e-46	189	cin:100187451	kelch-like protein 9/13	-	-	GO:0044464//cell part	--
CL10459.Contig2_sinensis	1436	306	2140	38.2533	320.6818	3.06748636191909	Up	0	0	gi|358640269|dbj|BAL21566.1|	63.9	2e-08	shell matrix protein [Pinctada maxima]	gi|60601939|gb|AY811538.1|	69.9	3e-08	Schistosoma japonicum SJCHGC09055 protein mRNA, partial cds	sp|Q75JC9|Y8484_DICDI	187	4e-47	Uncharacterized protein DDB_G0271670 OS=Dictyostelium discoideum GN=DDB_G0271670 PE=4 SV=1	YLR106c	89.4	1e-17	COG5271	AAA ATPase containing von Willebrand factor type A (vWA) domain	K11294	8e-21	102	cel:K07H8.10	nucleolin	-	-	-	--
Unigene32003_sinensis	6796	662	4628	17.4866	146.5396	3.06696887094858	Up	0	0	gi|405950184|gb|EKC18186.1|	476.5	9e-132	hypothetical protein CGI_10014625 [Crassostrea gigas]	--	--	--	--	sp|Q5CZC0|FSIP2_HUMAN	108	2e-22	Fibrous sheath-interacting protein 2 OS=Homo sapiens GN=FSIP2 PE=2 SV=4	SSO2249	63.5	5e-09	COG0419	ATPase involved in DNA repair	K00907	6e-19	98.6	dme:Dmel_CG18255	myosin-light-chain kinase [EC:2.7.11.18]	-	-	-	--
Unigene29385_sinensis	1551	389	2716	45.0235	376.8191	3.06512197602892	Up	0	0	gi|443688280|gb|ELT91021.1|	387.5	1e-105	hypothetical protein CAPTEDRAFT_223760 [Capitella teleta]	--	--	--	--	sp|Q6IND7|LR2BP_XENLA	344	3e-94	LRP2-binding protein OS=Xenopus laevis GN=lrp2bp PE=2 SV=1	NMB0419	69.7	1e-11	COG0790	FOG: TPR repeat, SEL1 subfamily	K07126	3e-15	84.0	ame:724401		-	-	-	--
Unigene27700_sinensis	869	82	572	16.9393	141.6417	3.06379990128402	Up	4.42692e-112	7.76874280806045e-110	gi|410812233|gb|AFV81458.1|	377.5	4e-103	testicular haploid expressed protein, partial [Scrobicularia plana]	--	--	--	--	sp|Q5XHX8|THEG_RAT	95.1	2e-19	Testicular haploid expressed gene protein OS=Rattus norvegicus GN=Theg PE=2 SV=2	--	--	--	--	--	--	--	--	--	--	GO:0044699	-	-	--
Unigene24728_sinensis	720	41	285	10.2224	85.1780	3.05874690560044	Up	1.347056e-56	1.36209063082729e-54	gi|260796475|ref|XP_002593230.1|	75.1	3e-12	hypothetical protein BRAFLDRAFT_120128 [Branchiostoma floridae] >gi|229278454|gb|EEN49241.1| hypothetical protein BRAFLDRAFT_120128 [Branchiostoma floridae]	--	--	--	--	sp|Q3V2K1|CX065_MOUSE	50.8	3e-06	Uncharacterized protein CXorf65 homolog OS=Mus musculus GN=Gm614 PE=2 SV=1	--	--	--	--	--	--	--	--	--	--	-	-	-	--
CL2896.Contig1_sinensis	1786	125	867	12.5641	104.4606	3.0555796594494	Up	1.68415e-168	4.39449611797753e-166	gi|72090816|ref|XP_795744.1|	389.0	4e-106	PREDICTED: UPF0602 protein C4orf47 homolog [Strongylocentrotus purpuratus]	--	--	--	--	sp|Q5XHC1|CD047_XENLA	333	7e-91	UPF0602 protein C4orf47 homolog OS=Xenopus laevis PE=2 SV=1	--	--	--	--	--	--	--	--	--	--	-	-	-	--
CL5552.Contig1_sinensis	1108	23	159	3.7264	30.8796	3.05079961495131	Up	3.52146e-32	2.38886657000974e-30	gi|405969741|gb|EKC34694.1|	263.5	1e-68	hypothetical protein CGI_10026831 [Crassostrea gigas]	--	--	--	--	sp|Q5VZQ5|TEX36_HUMAN	58.9	2e-08	Testis-expressed sequence 36 protein OS=Homo sapiens GN=TEX36 PE=2 SV=1	--	--	--	--	--	--	--	--	--	--	-	-	-	--
CL1645.Contig1_sinensis	1815	11	76	1.0880	9.0106	3.04994461917353	Up	4.12058e-16	1.62834196267725e-14	gi|91179154|gb|ABE27761.1|	228.8	7e-58	boule, partial [Azumapecten farreri]	gi|91179153|gb|DQ452385.1|	71.9	1e-08	Chlamys farreri boule mRNA, partial cds	sp|Q924M5|BOLL_MOUSE	172	2e-42	Protein boule-like OS=Mus musculus GN=Boll PE=2 SV=2	--	--	--	--	--	K14411	5e-13	77.0	dya:Dyak_GE23609	RNA-binding protein Musashi	-	-	-	--
CL10459.Contig1_sinensis	1375	413	2850	53.9199	446.0229	3.04822805783276	Up	0	0	gi|358640269|dbj|BAL21566.1|	73.2	3e-11	shell matrix protein [Pinctada maxima]	gi|60601939|gb|AY811538.1|	69.9	3e-08	Schistosoma japonicum SJCHGC09055 protein mRNA, partial cds	sp|Q75JC9|Y8484_DICDI	187	4e-47	Uncharacterized protein DDB_G0271670 OS=Dictyostelium discoideum GN=DDB_G0271670 PE=4 SV=1	YLR106c	92.0	2e-18	COG5271	AAA ATPase containing von Willebrand factor type A (vWA) domain	K11294	7e-21	102	cel:K07H8.10	nucleolin	-	-	-	--
Unigene34064_sinensis	1144	82	565	12.8674	106.2765	3.04603014581765	Up	4.29916e-110	7.41381628811881e-108	gi|405976442|gb|EKC40948.1|	270.8	9e-71	hypothetical protein CGI_10028670 [Crassostrea gigas]	--	--	--	--	sp|Q5TEZ5|CF163_HUMAN	109	1e-23	Uncharacterized protein C6orf163 OS=Homo sapiens GN=C6orf163 PE=1 SV=2	VC1837	59.3	1e-08	COG3064	Membrane protein involved in colicin uptake	K11515	2e-14	80.9	mgp:100539453	inner centromere protein	-	-	-	--
Unigene33249_sinensis	1258	43	296	6.1361	50.6321	3.0446584224833	Up	1.87039e-58	1.93622883967311e-56	gi|154416387|ref|XP_001581216.1|	79.0	6e-13	hypothetical protein [Trichomonas vaginalis G3] >gi|121915441|gb|EAY20230.1| hypothetical protein TVAG_021770 [Trichomonas vaginalis G3]	--	--	--	--	sp|Q8CHG3|GCC2_MOUSE	67.4	6e-11	GRIP and coiled-coil domain-containing protein 2 OS=Mus musculus GN=Gcc2 PE=1 SV=2	AF1032	62.0	2e-09	COG0419	ATPase involved in DNA repair	K10352	2e-10	67.4	cin:100176037	myosin heavy chain	GO:0044765;GO:0046907//intracellular transport;GO:0008104//protein localization	-	-	--
Unigene29434_sinensis	2097	287	1974	24.5689	202.5647	3.04347761250059	Up	0	0	gi|405978108|gb|EKC42522.1|	814.3	0.0	Kelch-like protein 10 [Crassostrea gigas]	--	--	--	--	sp|Q6JEL3|KLH10_RAT	684	0.0	Kelch-like protein 10 OS=Rattus norvegicus GN=Klhl10 PE=2 SV=1	--	--	--	--	--	K10448	0.0	727	ame:411968	kelch-like protein 10	GO:0048808//male genitalia morphogenesis;GO:0000902//cell morphogenesis;GO:0048873//homeostasis of number of cells within a tissue;GO:0008584//male gonad development;GO:0007286//spermatid development;GO:0009566//fertilization	-	GO:0005737//cytoplasm	--
Unigene31020_sinensis	1386	385	2646	49.8654	410.8106	3.04236237944216	Up	0	0	gi|405966318|gb|EKC31617.1|	390.2	1e-106	Ropporin-1-like protein [Crassostrea gigas]	gi|384371286|gb|JQ336987.1|	145	7e-31	Cerebratulus lacteus ropporin-1-like protein mRNA, complete cds	sp|Q4V7T8|ROP1L_XENLA	268	3e-71	Ropporin-1-like protein OS=Xenopus laevis GN=ropn1l PE=2 SV=1	--	--	--	--	--	--	--	--	--	--	GO:0007165//signal transduction;GO:0007286//spermatid development	GO:0008603//cAMP-dependent protein kinase regulator activity	-	--
Unigene26554_sinensis	840	47	323	10.0443	82.7443	3.04228290819622	Up	1.374254e-63	1.50302828769231e-61	gi|242020895|ref|XP_002430886.1|	64.7	6e-09	guanine nucleotide exchange factor, putative [Pediculus humanus corporis] >gi|212516097|gb|EEB18148.1| guanine nucleotide exchange factor, putative [Pediculus humanus corporis]	--	--	--	--	--	--	--	--	--	--	--	--	--	--	--	--	--	--	-	-	-	--
CL386.Contig2_sinensis	1937	7	48	0.6487	5.3324	3.03916166162394	Up	1.284574e-10	3.69356112282295e-09	gi|443714276|gb|ELU06760.1|	540.0	1e-151	hypothetical protein CAPTEDRAFT_221626 [Capitella teleta]	--	--	--	--	sp|A9UMP7|ENO4_XENLA	360	6e-99	Enolase-like protein ENO4 OS=Xenopus laevis GN=eno4 PE=2 SV=2	aq_484	160	1e-38	COG0148	Enolase	K01689	2e-132	473	spu:583138	enolase [EC:4.2.1.11]	-	-	-	--
Unigene32675_sinensis	1389	6	41	0.7754	6.3518	3.03415284665717	Up	3.09452e-09	7.839713232e-08	gi|405972332|gb|EKC37105.1|	66.6	3e-09	hypothetical protein CGI_10028332 [Crassostrea gigas]	--	--	--	--	--	--	--	--	--	--	--	--	--	K10747	2e-07	58.2	nvi:100122984	DNA ligase 1 [EC:6.5.1.1]	-	-	-	--
CL2557.Contig1_sinensis	531	6	41	2.0284	16.6152	3.03408957447124	Up	3.09452e-09	7.83686346346783e-08	--	--	--	--	--	--	--	--	--	--	--	--	--	--	--	--	--	--	--	--	--	--	-	-	-	--
Unigene25411_sinensis	727	6	41	1.4816	12.1357	3.03402941824019	Up	3.09452e-09	7.83117013730476e-08	gi|405968304|gb|EKC33385.1|	298.9	1e-79	hypothetical protein CGI_10019884 [Crassostrea gigas]	--	--	--	--	--	--	--	--	--	--	--	--	--	--	--	--	--	--	-	-	-	--
CL9614.Contig1_sinensis	1776	6	41	0.6065	4.9677	3.0339985012037	Up	3.09452e-09	7.83401576598837e-08	gi|471192965|ref|XP_004253564.1|	74.7	1e-11	pro protein convertase subtilisin/kexintype 5 precursor, putative, partial [Entamoeba invadens IP1] >gi|440293713|gb|ELP86793.1| pro protein convertase subtilisin/kexintype 5 precursor, putative, partial [Entamoeba invadens IP1]	--	--	--	--	sp|Q04592|PCSK5_MOUSE	95.5	3e-19	Proprotein convertase subtilisin/kexin type 5 OS=Mus musculus GN=Pcsk5 PE=1 SV=3	--	--	--	--	--	K08654	6e-21	103	xla:446297	proprotein convertase subtilisin/kexin type 5 [EC:3.4.21.-]	-	-	-	--
CL257.Contig5_sinensis	5084	17	116	0.6003	4.9098	3.03190868468352	Up	9.84986e-24	5.32373852862684e-22	gi|405968554|gb|EKC33617.1|	251.1	4e-64	hypothetical protein CGI_10016472 [Crassostrea gigas]	--	--	--	--	sp|Q9P1Z9|CI174_HUMAN	672	0.0	Uncharacterized protein C9orf174 OS=Homo sapiens GN=C9orf174 PE=2 SV=2	PAB0812	53.1	5e-06	COG0419	ATPase involved in DNA repair	K10352	5e-14	82.0	cqu:CpipJ_CPIJ015899	myosin heavy chain	-	-	-	--
CL8754.Contig1_sinensis	1216	21	143	3.1002	25.3056	3.02902348658319	Up	6.81562e-29	4.25863165721973e-27	--	--	--	--	--	--	--	--	--	--	--	--	--	--	--	--	--	--	--	--	--	--	-	-	-	--
Unigene6108_sinensis	1111	5	34	0.8079	6.5854	3.02702243738093	Up	7.55202e-08	1.63805006656289e-06	--	--	--	--	--	--	--	--	--	--	--	--	--	--	--	--	--	--	--	--	--	--	-	-	-	--
Unigene2203_sinensis	1661	5	34	0.5404	4.4048	3.02697693526988	Up	7.55202e-08	1.63754024705882e-06	--	--	--	--	--	--	--	--	--	--	--	--	--	--	--	--	--	--	--	--	--	--	-	-	-	--
Unigene32056_sinensis	1240	5	34	0.7239	5.9003	3.02692598859703	Up	7.55202e-08	1.63856020361258e-06	--	--	--	--	--	--	--	--	--	--	--	--	--	--	--	--	--	--	--	--	--	--	-	-	-	--
CL4553.Contig2_sinensis	1970	281	1910	25.6060	208.6326	3.02641079719789	Up	0	0	gi|167391687|ref|XP_001739888.1|	79.3	8e-13	axoneme-associated protein mst101 [Entamoeba dispar SAW760]	--	--	--	--	sp|Q8VDD5|MYH9_MOUSE	59.3	3e-08	Myosin-9 OS=Mus musculus GN=Myh9 PE=1 SV=4	MK0690	53.9	1e-06	COG0419	ATPase involved in DNA repair	K10352	2e-08	62.0	xtr:100487997	myosin heavy chain	-	-	-	--
Unigene24014_sinensis	1148	145	985	22.6740	184.6330	3.0255496036206	Up	2.7206e-189	8.06559495319149e-187	gi|405976433|gb|EKC40939.1|	417.9	4e-115	Testis-specific serine/threonine-protein kinase 1 [Crassostrea gigas]	gi|343455233|gb|HQ678180.1|	67.9	1e-07	Mytilus edulis putative testis-specific serine/threonine kinase mRNA, partial cds	sp|Q3SZW1|TSSK1_BOVIN	315	1e-85	Testis-specific serine/threonine-protein kinase 1 OS=Bos taurus GN=TSSK1B PE=2 SV=1	YAL017w_2	136	8e-32	COG0515	Serine/threonine protein kinase	K08811	7e-93	341	bfo:BRAFLDRAFT_275716	testis-specific serine kinase [EC:2.7.11.1]	GO:0006468//protein phosphorylation;GO:0007286//spermatid development	GO:0004674//protein serine/threonine kinase activity;GO:0005524//ATP binding;GO:0005515//protein binding;GO:0000287//magnesium ion binding	GO:0001669//acrosomal vesicle;GO:0031514//motile cilium	--
CL4553.Contig1_sinensis	1991	287	1949	25.8769	210.6471	3.02509135344539	Up	0	0	gi|471233079|ref|XP_004037588.1|	60.8	3e-07	hypothetical protein IMG5_048190 [Ichthyophthirius multifiliis] >gi|340507677|gb|EGR33602.1| hypothetical protein IMG5_048190 [Ichthyophthirius multifiliis]	--	--	--	--	sp|Q8VDD5|MYH9_MOUSE	57.0	2e-07	Myosin-9 OS=Mus musculus GN=Myh9 PE=1 SV=4	--	--	--	--	--	K10352	5e-08	60.5	xtr:100487997	myosin heavy chain	-	-	-	--
Unigene31232_sinensis	2854	8704	59083	547.4778	4454.7523	3.02447284470423	Up	0	0	gi|227955309|gb|ACP43444.1|	1369.0	0.0	arginine kinase [Meretrix meretrix] >gi|227955311|gb|ACP43445.1| arginine kinase [Meretrix lyrata]	gi|227955310|gb|FJ895115.1|	1344	0.0	Meretrix lyrata arginine kinase mRNA, complete cds	sp|P16641|KTRC_SCHMA	630	5e-180	Taurocyamine kinase OS=Schistosoma mansoni GN=Smp_194770 PE=1 SV=3	CAC3190	108	5e-23	COG3869	Arginine kinase	K00933	3e-119	430	spu:373287	creatine kinase [EC:2.7.3.2]	GO:0016310//phosphorylation	GO:0016301//kinase activity;GO:0005524//ATP binding	-	--
CL8303.Contig1_sinensis	2542	37	251	2.6129	21.2478	3.02358965564492	Up	1.78605e-49	1.66131264953271e-47	gi|405971184|gb|EKC36036.1|	116.7	6e-24	hypothetical protein CGI_10012434 [Crassostrea gigas]	--	--	--	--	--	--	--	--	--	--	--	--	--	--	--	--	--	--	-	-	-	--
CL2923.Contig6_sinensis	4758	32	217	1.2073	9.8141	3.02307175813946	Up	5.59428e-43	4.70710016086957e-41	gi|405967203|gb|EKC32397.1|	840.5	0.0	Chloride channel protein 7 [Crassostrea gigas]	--	--	--	--	sp|P51798|CLCN7_HUMAN	601	4e-171	H(+)/Cl(-) exchange transporter 7 OS=Homo sapiens GN=CLCN7 PE=1 SV=2	YJR040w_1	151	1e-35	COG0038	Chloride channel protein EriC	K05016	0.0	645	api:100162410	chloride channel 7	-	-	-	--
CL9474.Contig1_sinensis	1837	13	88	1.2704	10.3083	3.0204517066252	Up	2.81346e-18	1.21821593996271e-16	gi|405972823|gb|EKC37571.1|	275.0	9e-72	Death-associated protein kinase 1 [Crassostrea gigas]	--	--	--	--	sp|Q3UES3|TNKS2_MOUSE	75.9	3e-13	Tankyrase-2 OS=Mus musculus GN=Tnks2 PE=2 SV=2	all2748	69.7	2e-11	COG0666	FOG: Ankyrin repeat	K15503	2e-16	88.6	spu:755521	serine/threonine-protein phosphatase 6 regulatory ankyrin repeat subunit B	-	-	-	--
Unigene39246_sinensis	286	314	2125	197.0903	1598.8506	3.02010645708943	Up	0	0	gi|401405274|ref|XP_003882087.1|	54.7	1e-06	hypothetical protein NCLIV_018450 [Neospora caninum Liverpool] >gi|325116501|emb|CBZ52055.1| hypothetical protein NCLIV_018450 [Neospora caninum Liverpool]	--	--	--	--	sp|Q5R1T0|CAF1A_CHICK	50.8	7e-07	Chromatin assembly factor 1 subunit A OS=Gallus gallus GN=CHAF1A PE=1 SV=1	--	--	--	--	--	K14822	8e-07	52.4	tgu:100219403	rRNA-processing protein CGR1	-	-	-	--
CL6324.Contig2_sinensis	3086	60	406	3.4903	28.3103	3.01990408722935	Up	6.4023e-79	8.66100657669903e-77	gi|405953933|gb|EKC21496.1|	554.7	1e-155	Tetratricopeptide repeat protein 29 [Crassostrea gigas]	--	--	--	--	sp|Q32NR4|TTC29_XENLA	300	2e-80	Tetratricopeptide repeat protein 29 OS=Xenopus laevis GN=ttc29 PE=2 SV=1	sll0499_1	67.0	2e-10	COG0457	FOG: TPR repeat	K15837	9e-10	67.0	acs:100562092	G-protein signaling modulator 2	-	-	-	--
Unigene6963_sinensis	3682	17	115	0.8288	6.7209	3.01955853001521	Up	1.893106e-23	1.01298618981567e-21	gi|291242767|ref|XP_002741280.1|	68.6	1e-42	PREDICTED: Sterile alpha motif domain-containing protein 9-like [Saccoglossus kowalevskii]	--	--	--	--	sp|Q8IVG5|SAM9L_HUMAN	99.4	5e-20	Sterile alpha motif domain-containing protein 9-like OS=Homo sapiens GN=SAMD9L PE=1 SV=2	--	--	--	--	--	--	--	--	--	--	-	-	-	--
CL6164.Contig1_sinensis	2880	17	115	1.0596	8.5925	3.0195581977774	Up	1.893106e-23	1.01376481102229e-21	gi|405958788|gb|EKC24880.1|	993.4	0.0	Leucine-rich repeat and guanylate kinase domain-containing protein [Crassostrea gigas]	--	--	--	--	sp|Q96M69|LRGUK_HUMAN	550	7e-156	Leucine-rich repeat and guanylate kinase domain-containing protein OS=Homo sapiens GN=LRGUK PE=2 SV=1	YDR454c	124	9e-28	COG0194	Guanylate kinase	K00942	2e-37	158	isc:IscW_ISCW011552	guanylate kinase [EC:2.7.4.8]	-	-	-	--
Unigene4936_sinensis	1812	123	832	12.1856	98.8053	3.0194111423987	Up	7.50302e-160	1.85364503680851e-157	gi|123496999|ref|XP_001327090.1|	65.5	1e-08	trichohyalin [Trichomonas vaginalis G3]	gi|468263304|gb|GAGG011027309.1|	73.8	3e-09	TSA: Anolis carolinensis k56:1443325 transcribed RNA sequence	--	--	--	--	--	--	--	--	--	--	--	--	--	--	-	-	-	--
Unigene33523_sinensis	2496	99	669	7.1202	57.6762	3.01798644478121	Up	7.86602e-129	1.56130412358974e-126	gi|405959162|gb|EKC25224.1|	615.1	5e-174	cAMP and cAMP-inhibited cGMP 3&apos;,5&apos;-cyclic phosphodiesterase 10A [Crassostrea gigas]	--	--	--	--	sp|Q9Y233|PDE10_HUMAN	570	7e-162	cAMP and cAMP-inhibited cGMP 3',5'-cyclic phosphodiesterase 10A OS=Homo sapiens GN=PDE10A PE=1 SV=1	--	--	--	--	--	K01120	2e-164	580	tgu:100231795	3',5'-cyclic-nucleotide phosphodiesterase [EC:3.1.4.17]	GO:0009987//cellular process;GO:0050896//response to stimulus;GO:0044699;GO:0065007//biological regulation	GO:0004118//cGMP-stimulated cyclic-nucleotide phosphodiesterase activity;GO:0030552//cAMP binding	-	--
CL6314.Contig2_sinensis	2784	371	2505	23.9225	193.6215	3.01679909025231	Up	0	0	gi|405951139|gb|EKC19078.1|	197.6	3e-48	Low-density lipoprotein receptor-related protein 1B [Crassostrea gigas]	--	--	--	--	sp|G5EFX6|SLIT1_CAEEL	99.8	3e-20	Slit homolog 1 protein OS=Caenorhabditis elegans GN=slt-1 PE=3 SV=1	--	--	--	--	--	K04550	3e-23	111	aag:AaeL_AAEL007041	low density lipoprotein-related protein 1 (alpha-2-macroglobulin receptor)	-	-	-	--
Unigene28300_sinensis	506	4	27	1.4191	11.4823	3.0163634939827	Up	1.877456e-06	3.35644039168591e-05	--	--	--	--	--	--	--	--	--	--	--	--	--	--	--	--	--	--	--	--	--	--	-	-	-	--
CL1678.Contig1_sinensis	719	4	27	0.9987	8.0807	3.01635699720793	Up	1.877456e-06	3.35902624714946e-05	--	--	--	--	--	--	--	--	--	--	--	--	--	--	--	--	--	--	--	--	--	--	-	-	-	--
Unigene23575_sinensis	1473	4	27	0.4875	3.9444	3.01633173827713	Up	1.877456e-06	3.35557932437147e-05	gi|405950309|gb|EKC18305.1|	144.4	1e-32	hypothetical protein CGI_10013720 [Crassostrea gigas]	--	--	--	--	sp|Q54P70|Y4757_DICDI	65.1	4e-10	OTU domain-containing protein DDB_G0284757 OS=Dictyostelium discoideum GN=DDB_G0284757 PE=4 SV=2	YHL013c	61.6	3e-09	COG5539	Predicted cysteine protease (OTU family)	--	--	--	--	--	-	GO:0003824//catalytic activity	-	--
Unigene29769_sinensis	694	4	27	1.0347	8.3718	3.01632531178491	Up	1.877456e-06	3.35988908461341e-05	gi|443734898|gb|ELU18754.1|	249.2	1e-64	hypothetical protein CAPTEDRAFT_147200 [Capitella teleta]	--	--	--	--	sp|B1WBM3|TM138_RAT	189	5e-48	Transmembrane protein 138 OS=Rattus norvegicus GN=Tmem138 PE=2 SV=1	--	--	--	--	--	--	--	--	--	--	GO:0042384//cilium assembly	-	GO:0005929//cilium;GO:0016020//membrane	--
CL9094.Contig2_sinensis	1556	4	27	0.4615	3.7340	3.01631937458043	Up	1.877456e-06	3.36075236546763e-05	gi|260819262|ref|XP_002604956.1|	416.8	1e-114	hypothetical protein BRAFLDRAFT_92596 [Branchiostoma floridae] >gi|229290285|gb|EEN60966.1| hypothetical protein BRAFLDRAFT_92596 [Branchiostoma floridae]	--	--	--	--	sp|Q6GMG6|S5A3B_DANRE	404	3e-112	Solute carrier family 52, riboflavin transporter, member 3-B OS=Danio rerio GN=slc52a3b PE=2 SV=1	--	--	--	--	--	K14620	2e-115	416	bfo:BRAFLDRAFT_92596	riboflavin transporter 2	-	-	GO:0016020//membrane	--
Unigene7439_sinensis	740	4	27	0.9704	7.8514	3.0162984714232	Up	1.877456e-06	3.35816385273427e-05	gi|405950353|gb|EKC18347.1|	321.2	2e-86	Excitatory amino acid transporter 3 [Crassostrea gigas]	gi|348544449|ref|XM_003459646.1|	75.8	3e-10	PREDICTED: Oreochromis niloticus excitatory amino acid transporter 3-like (LOC100711441), mRNA	sp|O57321|EAA1_AMBTI	277	2e-74	Excitatory amino acid transporter 1 OS=Ambystoma tigrinum GN=SLC1A3 PE=2 SV=1	aq_1330	179	6e-45	COG1301	Na+/H+-dicarboxylate symporters	K05614	4e-75	281	dre:556181	solute carrier family 1 (glial high affinity glutamate transporter), member 3	GO:0006835//dicarboxylic acid transport	GO:0017153//sodium:dicarboxylate symporter activity	GO:0016020//membrane	--
Unigene29499_sinensis	886	4	27	0.8105	6.5576	3.01628381215392	Up	1.877456e-06	3.35730190102669e-05	gi|405957218|gb|EKC23446.1|	71.6	5e-11	Tripartite motif-containing protein 56 [Crassostrea gigas]	--	--	--	--	--	--	--	--	--	--	--	--	--	--	--	--	--	--	-	-	-	--
Unigene34773_sinensis	2440	67	452	4.9293	39.8624	3.01557388126043	Up	1.528028e-87	2.20406175428571e-85	gi|405972486|gb|EKC37252.1|	589.7	2e-166	Putative malate dehydrogenase 1B [Crassostrea gigas]	--	--	--	--	sp|Q5ZME2|MDHC_CHICK	177	7e-44	Malate dehydrogenase, cytoplasmic OS=Gallus gallus GN=MDH1 PE=2 SV=1	RSc1998	153	2e-36	COG0039	Malate/lactate dehydrogenases	K00025	4e-49	197	nvi:100119291	malate dehydrogenase [EC:1.1.1.37]	GO:0009987//cellular process;GO:0044710	GO:0016491//oxidoreductase activity	-	--
CL6884.Contig1_sinensis	2046	78	526	6.8437	55.3216	3.01499445798513	Up	1.429202e-101	2.2527392338914e-99	gi|390341544|ref|XP_003725476.1|	125.2	1e-26	PREDICTED: uncharacterized protein C16orf73 homolog [Strongylocentrotus purpuratus]	--	--	--	--	sp|Q9D513|MEIOB_MOUSE	280	9e-75	Meiosis-specific with OB domain-containing protein OS=Mus musculus GN=Meiob PE=2 SV=3	--	--	--	--	--	K07466	7e-08	60.1	cbr:CBG13026	replication factor A1	-	-	-	--
Unigene36544_sinensis	2157	31	209	2.5800	20.8502	3.01461825164375	Up	2.43796e-41	1.99823806164706e-39	gi|431910116|gb|ELK13189.1|	57.4	3e-06	Mucin-2 [Pteropus alecto]	--	--	--	--	sp|O01761|UNC89_CAEEL	89.0	4e-17	Muscle M-line assembly protein unc-89 OS=Caenorhabditis elegans GN=unc-89 PE=1 SV=3	--	--	--	--	--	K04574	3e-14	81.3	gga:417020	neurofilament heavy polypeptide	GO:0007010//cytoskeleton organization	GO:0005488//binding	GO:0043229//intracellular organelle	--
Unigene4953_sinensis	1168	19	128	2.9202	23.5821	3.01355311132503	Up	6.87918e-26	3.95107659868096e-24	gi|187607189|ref|NP_001120599.1|	69.3	4e-10	amphibian RCA protein 3 [Xenopus (Silurana) tropicalis] >gi|171846402|gb|AAI61634.1| LOC100145756 protein [Xenopus (Silurana) tropicalis] >gi|237512855|dbj|BAH58780.1| ARC3 [Xenopus (Silurana) tropicalis]	--	--	--	--	sp|Q28085|CFAH_BOVIN	50.8	6e-06	Complement factor H OS=Bos taurus GN=CFH PE=1 SV=3	--	--	--	--	--	K04004	7e-06	52.4	rno:155012	complement factor H	-	-	-	--
Unigene30214_sinensis	1527	178	1199	20.9258	168.9644	3.01336462586961	Up	4.58238e-229	1.64561769185567e-226	--	--	--	--	--	--	--	--	--	--	--	--	--	--	--	--	--	--	--	--	--	--	-	-	-	--
Unigene28920_sinensis	1321	49	330	6.6588	53.7559	3.01308899301984	Up	2.57818e-64	2.86474038947368e-62	gi|405958778|gb|EKC24870.1|	155.6	5e-36	hypothetical protein CGI_10021467 [Crassostrea gigas]	--	--	--	--	sp|Q5BN45|CI116_MOUSE	95.1	3e-19	UPF0691 protein C9orf116 homolog OS=Mus musculus PE=2 SV=1	--	--	--	--	--	--	--	--	--	--	-	-	-	--
CL1890.Contig1_sinensis	3999	30	202	1.3467	10.8696	3.01279844313457	Up	5.54068e-40	4.39150892969283e-38	gi|405958476|gb|EKC24603.1|	576.2	4e-162	Putative ATP-dependent RNA helicase DDX58 [Crassostrea gigas]	--	--	--	--	sp|Q9BYX4|IFIH1_HUMAN	334	8e-91	Interferon-induced helicase C domain-containing protein 1 OS=Homo sapiens GN=IFIH1 PE=1 SV=3	MA0096_1	133	2e-30	COG1111	ERCC4-like helicases	K12646	1e-101	372	bfo:BRAFLDRAFT_249506	ATP-dependent RNA helicase DDX58 [EC:3.6.3.14]	GO:0044699;GO:0048518;GO:0050896//response to stimulus;GO:0050794//regulation of cellular process	GO:0016787//hydrolase activity;GO:0003676//nucleic acid binding	-	--
Unigene33529_sinensis	1250	15	101	2.1542	17.3871	3.01279322139211	Up	1.007228e-20	4.8730949675e-19	--	--	--	--	--	--	--	--	--	--	--	--	--	--	--	--	--	--	--	--	--	--	-	-	-	--
Unigene8723_sinensis	1921	30	202	2.8035	22.6276	3.01278259812297	Up	5.54068e-40	4.39651064829157e-38	gi|405952544|gb|EKC20342.1|	727.6	0.0	Leucine-rich repeat-containing protein 48 [Crassostrea gigas]	--	--	--	--	sp|Q5XI54|LRC48_RAT	568	1e-161	Leucine-rich repeat-containing protein 48 OS=Rattus norvegicus GN=Lrrc48 PE=2 SV=1	SPAC4A8.12c	75.5	3e-13	COG4886	Leucine-rich repeat (LRR) protein	K11293	8e-16	86.3	cel:K10D2.1	protein HIRA/HIR1	-	-	GO:0005737//cytoplasm	--
Unigene35077_sinensis	3004	325	2188	19.4216	156.7337	3.01258144975719	Up	0	0	gi|291231836|ref|XP_002735862.1|	1044.7	0.0	PREDICTED: EFHC2 protein-like [Saccoglossus kowalevskii]	gi|291231835|ref|XM_002735816.1|	73.8	4e-09	PREDICTED: Saccoglossus kowalevskii EFHC2 protein-like (LOC100377378), mRNA	sp|Q32TF8|EFHC2_DANRE	917	0.0	EF-hand domain-containing family member C2 OS=Danio rerio GN=efhc2 PE=2 SV=2	--	--	--	--	--	--	--	--	--	--	-	-	-	--
Unigene27029_sinensis	2022	448	3014	39.7739	320.7577	3.01158996200168	Up	0	0	--	--	--	--	--	--	--	--	--	--	--	--	--	--	--	--	--	--	--	--	--	--	-	-	-	--
Unigene32514_sinensis	2879	11	74	0.6859	5.5310	3.01147018127253	Up	1.527828e-15	5.89381223322259e-14	gi|321467016|gb|EFX78008.1|	67.4	5e-09	hypothetical protein DAPPUDRAFT_105663 [Daphnia pulex]	--	--	--	--	--	--	--	--	--	--	--	--	--	--	--	--	--	--	-	-	-	--
CL9528.Contig1_sinensis	4682	46	309	1.7637	14.2018	3.00939670613372	Up	2.97282e-60	3.17172123399694e-58	gi|405972406|gb|EKC37178.1|	968.8	0.0	HEAT repeat-containing protein 4 [Crassostrea gigas]	--	--	--	--	sp|Q86WZ0|HEAT4_HUMAN	375	5e-103	HEAT repeat-containing protein 4 OS=Homo sapiens GN=HEATR4 PE=2 SV=2	--	--	--	--	--	K13163	2e-09	66.2	dan:Dana_GF14830	male-specific lethal 1	-	-	-	--
Unigene31060_sinensis	1364	35	235	4.6063	37.0739	3.00872360845071	Up	3.37544e-46	2.99190240916031e-44	gi|405972154|gb|EKC36940.1|	322.4	3e-86	hypothetical protein CGI_10023087 [Crassostrea gigas]	--	--	--	--	sp|Q8CDT7|CJ107_MOUSE	131	4e-30	Uncharacterized protein C10orf107 homolog OS=Mus musculus PE=2 SV=2	--	--	--	--	--	--	--	--	--	--	-	-	-	--
CL6072.Contig2_sinensis	270	7	47	4.6541	37.4584	3.00871516299093	Up	2.47772e-10	6.95488616760677e-09	--	--	--	--	--	--	--	--	--	--	--	--	--	--	--	--	--	--	--	--	--	--	-	-	-	--
CL2521.Contig3_sinensis	2105	42	282	3.5818	28.8278	3.00870405373857	Up	4.05518e-55	4.06504079741007e-53	gi|156387538|ref|XP_001634260.1|	75.9	1e-11	predicted protein [Nematostella vectensis] >gi|156221341|gb|EDO42197.1| predicted protein [Nematostella vectensis]	--	--	--	--	sp|Q3KQU3|MA7D1_HUMAN	53.9	1e-06	MAP7 domain-containing protein 1 OS=Homo sapiens GN=MAP7D1 PE=1 SV=1	--	--	--	--	--	K10433	2e-07	58.5	tgu:100220304	microtubule-associated protein 7	-	-	-	--
Unigene31977_sinensis	994	108	725	19.5047	156.9519	3.00842878005734	Up	5.10996e-139	1.09540247150769e-136	gi|260790165|ref|XP_002590114.1|	68.2	7e-10	hypothetical protein BRAFLDRAFT_83392 [Branchiostoma floridae] >gi|229275302|gb|EEN46125.1| hypothetical protein BRAFLDRAFT_83392 [Branchiostoma floridae]	--	--	--	--	sp|Q497N7|CF201_MOUSE	57.8	4e-08	Uncharacterized protein C6orf201 homolog OS=Mus musculus PE=2 SV=1	--	--	--	--	--	--	--	--	--	--	-	-	-	--
Unigene5202_sinensis	1840	51	342	4.9757	39.9966	3.00690595695303	Up	1.85608e-66	2.15160128985025e-64	gi|405971976|gb|EKC36775.1|	112.1	1e-22	hypothetical protein CGI_10019434 [Crassostrea gigas]	--	--	--	--	--	--	--	--	--	--	--	--	--	--	--	--	--	--	-	-	-	--
Unigene32293_sinensis	3796	411	2755	19.4365	156.1746	3.0063194786321	Up	0	0	gi|471190887|ref|XP_004185151.1|	61.2	5e-07	hypothetical protein EIN_281760 [Entamoeba invadens IP1] >gi|440292618|gb|ELP85805.1| hypothetical protein EIN_281760 [Entamoeba invadens IP1]	--	--	--	--	--	--	--	--	--	--	--	--	--	K00907	1e-06	57.0	der:Dere_GG25360	myosin-light-chain kinase [EC:2.7.11.18]	-	-	-	--
Unigene33378_sinensis	1763	255	1709	25.9651	208.5954	3.00606165668792	Up	0	0	gi|123498057|ref|XP_001327309.1|	62.0	1e-07	hypothetical protein [Trichomonas vaginalis G3] >gi|121910237|gb|EAY15086.1| hypothetical protein TVAG_392030 [Trichomonas vaginalis G3]	--	--	--	--	sp|P39922|MYS3_HYDVU	55.5	4e-07	Myosin heavy chain, clone 203 (Fragment) OS=Hydra vulgaris PE=2 SV=1	--	--	--	--	--	K10352	8e-07	56.2	gga:395279	myosin heavy chain	-	-	-	--
CL4429.Contig2_sinensis	4537	40	268	1.5827	12.7110	3.00561781016328	Up	2.0764e-52	2.02322673566434e-50	gi|291243931|ref|XP_002741853.1|	199.1	1e-48	PREDICTED: prominin 1 b-like [Saccoglossus kowalevskii]	--	--	--	--	sp|O54990|PROM1_MOUSE	190	2e-47	Prominin-1 OS=Mus musculus GN=Prom1 PE=1 SV=1	--	--	--	--	--	K06532	3e-49	198	spu:594323	prominin 1	GO:0060042//retina morphogenesis in camera-type eye;GO:0030154//cell differentiation	-	GO:0005929//cilium;GO:0044425//membrane part;GO:0005886//plasma membrane	--
Unigene25785_sinensis	1052	46	308	7.8495	63.0014	3.00471122335971	Up	5.69436e-60	6.04756656768293e-58	gi|405958525|gb|EKC24647.1|	291.2	6e-77	A-kinase anchor protein 14 [Crassostrea gigas]	--	--	--	--	sp|O35817|AKA14_RAT	134	3e-31	A-kinase anchor protein 14 OS=Rattus norvegicus GN=Akap14 PE=2 SV=1	--	--	--	--	--	--	--	--	--	--	GO:0007283//spermatogenesis	GO:0051018//protein kinase A binding	GO:0044441//cilium part	--
CL2719.Contig2_sinensis	679	31	207	8.1958	65.6018	3.00077871626945	Up	8.95512e-41	7.20432165450346e-39	gi|405961405|gb|EKC27214.1|	53.9	7e-06	hypothetical protein CGI_10005085 [Crassostrea gigas]	--	--	--	--	--	--	--	--	--	--	--	--	--	--	--	--	--	--	-	-	-	--
Unigene34841_sinensis	801	3	20	0.6723	5.3729	2.99852393228408	Up	4.8025e-05	0.00067524797679112	--	--	--	--	--	--	--	--	--	--	--	--	--	--	--	--	--	--	--	--	--	--	-	-	-	--
Unigene5868_sinensis	1093	3	20	0.4927	3.9375	2.99849854673718	Up	4.8025e-05	0.000674567283266129	--	--	--	--	--	--	--	--	--	--	--	--	--	--	--	--	--	--	--	--	--	--	-	-	-	--
Unigene31597_sinensis	1227	6	40	0.8778	7.0150	2.99847892853498	Up	5.97116e-09	1.46325974688709e-07	--	--	--	--	--	--	--	--	--	--	--	--	--	--	--	--	--	--	--	--	--	--	-	-	-	--
Unigene30180_sinensis	783	6	40	1.3756	10.9929	2.99843910293701	Up	5.97116e-09	1.46428984878564e-07	gi|321452113|gb|EFX63581.1|	99.4	2e-19	hypothetical protein DAPPUDRAFT_268209 [Daphnia pulex]	--	--	--	--	sp|C0JAZ9|A1O_LOXAM	54.7	2e-07	Sphingomyelin phosphodiesterase D LamSicTox-alphaIC1 (Fragment) OS=Loxosceles amazonica PE=2 SV=1	--	--	--	--	--	--	--	--	--	--	-	-	-	--
Unigene29798_sinensis	520	3	20	1.0357	8.2764	2.99839719892026	Up	4.8025e-05	0.000674839395925777	--	--	--	--	--	--	--	--	--	--	--	--	--	--	--	--	--	--	--	--	--	--	-	-	-	--
Unigene10951_sinensis	1232	6	40	0.8743	6.9866	2.99839024068572	Up	5.97116e-09	1.46377461660802e-07	--	--	--	--	--	--	--	--	--	--	--	--	--	--	--	--	--	--	--	--	--	--	-	-	-	--
Unigene7059_sinensis	1439	9	60	1.1228	8.9723	2.99837689056905	Up	8.43198e-13	2.79072501007126e-11	--	--	--	--	--	--	--	--	--	--	--	--	--	--	--	--	--	--	--	--	--	--	-	-	-	--
CL125.Contig1_sinensis	762	3	20	0.7068	5.6479	2.99834059991336	Up	4.8025e-05	0.000674975534597539	--	--	--	--	--	--	--	--	--	--	--	--	--	--	--	--	--	--	--	--	--	--	-	-	-	--
CL4318.Contig2_sinensis	1811	3	20	0.2974	2.3764	2.99830114114674	Up	4.8025e-05	0.000675111728208232	gi|405970996|gb|EKC35856.1|	261.5	1e-67	Nuclear autoantigenic sperm protein [Crassostrea gigas]	gi|85540525|gb|AC105299.44|	65.9	6e-07	Mus musculus strain C57BL/6J clone rp23-27h12 map 17, complete sequence	sp|Q02508|HGV2_HALRO	277	6e-74	Protein HGV2 OS=Halocynthia roretzi GN=HGV2 PE=2 SV=1	XF1267	55.8	2e-07	COG5297	Cellobiohydrolase A (1,4-beta-cellobiosidase A)	K11291	8e-79	295	mmu:50927	nuclear autoantigenic sperm protein	GO:0007049//cell cycle;GO:0006260//DNA replication;GO:0001824//blastocyst development;GO:0043486//histone exchange;GO:0008283//cell proliferation	GO:0042393//histone binding;GO:0051879//Hsp90 protein binding	GO:0005634//nucleus	--
Unigene29282_sinensis	1423	3	20	0.3785	3.0244	2.99828375429261	Up	4.8025e-05	0.00067470331215971	gi|405953907|gb|EKC21475.1|	94.4	1e-17	hypothetical protein CGI_10003856 [Crassostrea gigas]	--	--	--	--	sp|Q6NZG4|NOXIN_MOUSE	77.4	7e-14	Nitric oxide-inducible gene protein OS=Mus musculus GN=Noxin PE=2 SV=1	--	--	--	--	--	--	--	--	--	--	GO:0071480//cellular response to gamma radiation;GO:0071345//cellular response to cytokine stimulus;GO:0030097//hemopoiesis;GO:0071850//mitotic cell cycle arrest;GO:0007286//spermatid development;GO:0034644//cellular response to UV;GO:0071447//cellular response to hydroperoxide;GO:2000270//negative regulation of fibroblast apoptotic process;GO:0006974//response to DNA damage stimulus	-	GO:0005737//cytoplasm;GO:0005634//nucleus	--
CL9133.Contig2_sinensis	1567	44	293	5.0406	40.2359	2.99681592535328	Up	5.56818e-57	5.67148439210526e-55	gi|443697458|gb|ELT97934.1|	368.6	5e-100	hypothetical protein CAPTEDRAFT_173803 [Capitella teleta]	gi|240120143|ref|NM_001161804.1|	79.8	4e-11	Ciona intestinalis radial spoke protein MORN40 (ci-morn40), mRNA >gi|237769630|dbj|AB501299.1| Ciona intestinalis Ci-MORN40 mRNA for radial spoke protein MORN40, complete cds	sp|Q8VIG3|RSPH1_MOUSE	327	6e-89	Radial spoke head 1 homolog OS=Mus musculus GN=Rsph1 PE=1 SV=2	slr1485	116	9e-26	COG4642	Uncharacterized protein conserved in bacteria	K04575	3e-22	107	spu:580872	amyotrophic lateral sclerosis 2 (juvenile)	-	-	GO:0005829//cytosol;GO:0005634//nucleus	--
Unigene27724_sinensis	844	39	259	8.2951	66.0347	2.99289305445836	Up	1.72265e-50	1.63286126326531e-48	gi|405958072|gb|EKC24235.1|	257.3	6e-67	Sperm-associated antigen 8 [Crassostrea gigas]	gi|198435569|ref|XM_002121282.1|	91.7	5e-15	PREDICTED: Ciona intestinalis sperm-associated antigen 8-like (LOC100177416), mRNA	sp|Q99932|SPAG8_HUMAN	94.4	3e-19	Sperm-associated antigen 8 OS=Homo sapiens GN=SPAG8 PE=1 SV=2	--	--	--	--	--	--	--	--	--	--	-	-	-	--
CL7245.Contig2_sinensis	1161	11	73	1.7008	13.5302	2.99189775793158	Up	2.93478e-15	1.11363392058824e-13	gi|405953397|gb|EKC21068.1|	431.0	5e-119	MYCBP-associated protein [Crassostrea gigas]	--	--	--	--	sp|Q5SUV2|MYBPP_MOUSE	165	2e-40	MYCBP-associated protein OS=Mus musculus GN=Mycbpap PE=2 SV=1	--	--	--	--	--	--	--	--	--	--	-	-	-	--
Unigene29027_sinensis	1394	325	2156	41.8526	332.8135	2.99132480017406	Up	0	0	--	--	--	--	--	--	--	--	--	--	--	--	--	--	--	--	--	--	--	--	--	--	-	-	-	--
Unigene31067_sinensis	4122	189	1251	8.2311	65.3077	2.9880959507813	Up	7.05812e-237	2.658011688e-234	gi|291232432|ref|XP_002736161.1|	95.5	2e-17	PREDICTED: cubilin-like [Saccoglossus kowalevskii]	--	--	--	--	sp|A5PLK6|RGSL_HUMAN	152	6e-36	Regulator of G-protein signaling protein-like OS=Homo sapiens GN=RGSL1 PE=2 SV=1	--	--	--	--	--	--	--	--	--	--	-	-	-	--
Unigene11045_sinensis	1810	41	271	4.0664	32.2185	2.98606528689578	Up	1.231202e-52	1.20135311117647e-50	gi|405974728|gb|EKC39352.1|	68.2	1e-09	hypothetical protein CGI_10018992 [Crassostrea gigas]	--	--	--	--	--	--	--	--	--	--	--	--	--	--	--	--	--	--	-	-	-	--
CL4629.Contig1_sinensis	461	5	33	1.9470	15.4038	2.98396150752116	Up	1.458028e-07	3.03766006973684e-06	--	--	--	--	--	--	--	--	--	--	--	--	--	--	--	--	--	--	--	--	--	--	-	-	-	--
Unigene33954_sinensis	1582	15	99	1.7021	13.4662	2.98395509266958	Up	3.70598e-20	1.74926775487805e-18	gi|405972674|gb|EKC37430.1|	378.6	5e-103	Uncharacterized protein C14orf50 [Crassostrea gigas]	--	--	--	--	sp|D3Z0R2|PPR36_MOUSE	174	7e-43	Protein phosphatase 1 regulatory subunit 36 OS=Mus musculus GN=Ppp1r36 PE=3 SV=1	--	--	--	--	--	--	--	--	--	--	-	-	-	--
Unigene9642_sinensis	1341	10	66	1.3387	10.5908	2.98390697376077	Up	6.8768e-14	2.41969585454545e-12	gi|291234013|ref|XP_002736947.1|	516.5	1e-144	PREDICTED: yeast Glc Seven-like Phosphatases family member (gsp-1)-like [Saccoglossus kowalevskii]	gi|89886071|ref|NM_213670.2|	172	3e-39	Xenopus (Silurana) tropicalis protein phosphatase 1, catalytic subunit, gamma isozyme (ppp1cc), mRNA >gi|51967198|emb|CR761289.1| Xenopus tropicalis finished cDNA, clone TEgg061c20	sp|Q6NVU2|PPIG_XENTR	460	3e-129	Serine/threonine-protein phosphatase PP1-gamma catalytic subunit OS=Xenopus tropicalis GN=ppp1cc PE=2 SV=1	YER133w	459	6e-129	COG0639	Diadenosine tetraphosphatase and related serine/threonine protein phosphatases	K06269	2e-129	463	dre:327301	protein phosphatase 1, catalytic subunit [EC:3.1.3.16]	GO:0001525//angiogenesis	GO:0004721//phosphoprotein phosphatase activity;GO:0005509//calcium ion binding	-	--
CL5223.Contig2_sinensis	1880	234	1544	22.3439	176.7276	2.9835744397648	Up	1.910908e-291	9.24521176749999e-289	gi|405957018|gb|EKC23257.1|	171.0	1e-40	hypothetical protein CGI_10020939 [Crassostrea gigas]	--	--	--	--	sp|Q658L1|F154B_HUMAN	59.3	3e-08	Protein FAM154B OS=Homo sapiens GN=FAM154B PE=2 SV=1	--	--	--	--	--	--	--	--	--	--	-	-	-	--
Unigene31336_sinensis	1794	108	712	10.8069	85.4029	2.98233231992233	Up	2.3368e-135	4.84531307142857e-133	gi|405975257|gb|EKC39838.1|	814.7	0.0	T-complex-associated testis-expressed protein 1 [Crassostrea gigas]	--	--	--	--	sp|Q4R642|TCTE1_MACFA	486	9e-137	T-complex-associated testis-expressed protein 1 OS=Macaca fascicularis GN=TCTE1 PE=2 SV=1	--	--	--	--	--	K08727	4e-18	94.0	rno:500133	nucleotide-binding oligomerization domain-containing protein 1	-	-	-	--
Unigene32913_sinensis	1732	132	870	13.6813	108.0902	2.98195849999334	Up	5.75372e-165	1.45765788610909e-162	gi|405957038|gb|EKC23276.1|	538.5	4e-151	Uncharacterized protein C19orf45 [Crassostrea gigas]	--	--	--	--	sp|Q8NA69|CS045_HUMAN	77.0	1e-13	Uncharacterized protein C19orf45 OS=Homo sapiens GN=C19orf45 PE=2 SV=2	--	--	--	--	--	--	--	--	--	--	-	-	-	--
Unigene33008_sinensis	1995	278	1831	25.0152	197.4970	2.98095384673156	Up	0	0	gi|405950834|gb|EKC18795.1|	968.8	0.0	Sperm-associated antigen 6 [Crassostrea gigas]	gi|390346275|ref|XM_789118.3|	367	1e-97	PREDICTED: Strongylocentrotus purpuratus sperm-associated antigen 6-like (LOC589479), mRNA	sp|Q9JLI7|SPAG6_MOUSE	884	0.0	Sperm-associated antigen 6 OS=Mus musculus GN=Spag6 PE=1 SV=1	SPCC962.03c	89.4	2e-17	COG5064	Karyopherin (importin) alpha	K15043	3e-19	97.8	nve:NEMVE_v1g195115	importin subunit alpha-2	GO:0007283//spermatogenesis;GO:0030030//cell projection organization;GO:0030317//sperm motility	GO:0005515//protein binding	GO:0005737//cytoplasm;GO:0005929//cilium;GO:0005874//microtubule	--
CL1612.Contig1_sinensis	2027	29	191	2.5683	20.2766	2.98093012324473	Up	1.693592e-37	1.27008461838536e-35	gi|405970316|gb|EKC35231.1|	319.3	4e-85	hypothetical protein CGI_10019831 [Crassostrea gigas]	--	--	--	--	sp|Q96M20|CNBD2_HUMAN	86.3	2e-16	Cyclic nucleotide-binding domain-containing protein 2 OS=Homo sapiens GN=CNBD2 PE=2 SV=2	--	--	--	--	--	K04739	2e-08	61.6	smm:Smp_079010	cAMP-dependent protein kinase regulator	-	-	-	--
Unigene633_sinensis	832	7	46	1.5103	11.8973	2.97772714787653	Up	4.76724e-10	1.30862428510638e-08	--	--	--	--	--	--	--	--	--	--	--	--	--	--	--	--	--	--	--	--	--	--	-	-	-	--
Unigene24643_sinensis	1174	61	400	9.3275	73.3174	2.97459326541739	Up	1.308336e-76	1.71982001479245e-74	gi|405961773|gb|EKC27519.1|	289.3	2e-76	hypothetical protein CGI_10008825 [Crassostrea gigas]	gi|295852911|ref|XM_002739993.2|	61.9	7e-06	PREDICTED: Saccoglossus kowalevskii hypothetical protein LOC100374195 (LOC100374195), mRNA	sp|P0DJG4|THEGL_HUMAN	148	2e-35	Testicular haploid expressed gene protein-like OS=Homo sapiens GN=THEGL PE=2 SV=1	--	--	--	--	--	--	--	--	--	--	-	-	-	--
Unigene9343_sinensis	1228	9	59	1.3157	10.3388	2.97416627033215	Up	1.619096e-12	5.29332704007508e-11	--	--	--	--	--	--	--	--	--	--	--	--	--	--	--	--	--	--	--	--	--	--	-	-	-	--
Unigene1222_sinensis	3093	9	59	0.5224	4.1048	2.97408512864499	Up	1.619096e-12	5.29581217014085e-11	gi|405965442|gb|EKC30818.1|	322.0	1e-85	Structure-specific endonuclease subunit SLX4 [Crassostrea gigas]	--	--	--	--	--	--	--	--	--	--	--	--	--	K15177	5e-07	57.8	dpo:Dpse_GA27305	RNA polymerase-associated protein LEO1	-	-	-	--
Unigene34855_sinensis	4104	554	3630	24.2328	190.3331	2.97349345924863	Up	0	0	gi|405977076|gb|EKC41546.1|	802.0	0.0	Glutamine-rich protein 2 [Crassostrea gigas]	--	--	--	--	sp|Q9H0J4|QRIC2_HUMAN	270	3e-71	Glutamine-rich protein 2 OS=Homo sapiens GN=QRICH2 PE=1 SV=1	MK0690	57.8	2e-07	COG0419	ATPase involved in DNA repair	K10352	7e-16	87.8	xtr:100158525	myosin heavy chain	-	-	-	--
CL2925.Contig1_sinensis	3905	124	812	5.7004	44.7456	2.97261076122819	Up	1.337402e-153	3.19094040883562e-151	gi|118401580|ref|XP_001033110.1|	68.2	4e-09	TPR Domain containing protein [Tetrahymena thermophila] >gi|89287457|gb|EAR85447.1| TPR Domain containing protein [Tetrahymena thermophila SB210]	--	--	--	--	sp|Q8IIG1|YK213_PLAF7	56.2	5e-07	Uncharacterized protein PF11_0213 OS=Plasmodium falciparum (isolate 3D7) GN=PF11_0213 PE=2 SV=2	--	--	--	--	--	K11804	4e-06	55.1	api:100161855	WD repeat-containing protein 42A	-	-	-	--
Unigene295_sinensis	2220	505	3301	40.8357	319.9687	2.97002792109172	Up	0	0	--	--	--	--	--	--	--	--	--	--	--	--	--	--	--	--	--	--	--	--	--	--	-	-	-	--
Unigene22548_sinensis	715	66	431	16.5706	129.7138	2.96863422654665	Up	3.00862e-82	4.20055203967936e-80	gi|405970170|gb|EKC35100.1|	225.7	1e-57	hypothetical protein CGI_10015117 [Crassostrea gigas]	--	--	--	--	--	--	--	--	--	--	--	--	--	--	--	--	--	--	-	-	-	--
Unigene6660_sinensis	2428	173	1128	12.7908	99.9713	2.96640748164586	Up	3.45368e-212	1.16803122291262e-209	--	--	--	--	--	--	--	--	--	--	--	--	--	--	--	--	--	--	--	--	--	--	-	-	-	--
Unigene37757_sinensis	1422	8	52	1.0099	7.8690	2.96196786351195	Up	3.8345e-11	1.15447614736387e-09	--	--	--	--	--	--	--	--	--	--	--	--	--	--	--	--	--	--	--	--	--	--	-	-	-	--
CL10394.Contig1_sinensis	3231	18	117	1.0001	7.7923	2.96190495930019	Up	2.12552e-23	1.13473450482759e-21	gi|405970619|gb|EKC35509.1|	111.7	2e-22	Forkhead box protein H1 [Crassostrea gigas]	--	--	--	--	sp|O76329|ACTNB_DICDI	86.7	3e-16	Interaptin OS=Dictyostelium discoideum GN=abpD PE=1 SV=1	FN0522	71.2	1e-11	COG0419	ATPase involved in DNA repair	K10352	3e-15	85.1	hmg:100207631	myosin heavy chain	-	GO:0003824//catalytic activity	-	--
Unigene23456_sinensis	673	4	26	1.0670	8.3133	2.9618610984965	Up	3.62756e-06	6.22483935073892e-05	--	--	--	--	--	--	--	--	--	--	--	--	--	--	--	--	--	--	--	--	--	--	-	-	-	--
CL8121.Contig2_sinensis	677	4	26	1.0607	8.2642	2.96185849546701	Up	3.62756e-06	6.22330651662152e-05	--	--	--	--	--	--	--	--	--	--	--	--	--	--	--	--	--	--	--	--	--	--	-	-	-	--
CL6317.Contig1_sinensis	1385	4	26	0.5185	4.0396	2.96179655066097	Up	3.62756e-06	6.22177443722304e-05	gi|443705664|gb|ELU02097.1|	389.4	2e-106	hypothetical protein CAPTEDRAFT_224658 [Capitella teleta]	gi|109689857|gb|AC186185.2|	67.9	1e-07	Pan troglodytes BAC clone CH251-43N24 from chromosome 7, complete sequence	sp|Q9C000|NALP1_HUMAN	53.1	1e-06	NACHT, LRR and PYD domains-containing protein 1 OS=Homo sapiens GN=NLRP1 PE=1 SV=1	--	--	--	--	--	K12798	5e-06	53.1	hsa:22861	NACHT, LRR and PYD domains-containing protein 1	-	-	-	--
CL3583.Contig1_sinensis	2737	4	26	0.2624	2.0442	2.96169672819942	Up	3.62756e-06	6.22637294013304e-05	gi|405972245|gb|EKC37024.1|	100.9	3e-19	hypothetical protein CGI_10026009 [Crassostrea gigas]	--	--	--	--	--	--	--	--	--	--	--	--	--	--	--	--	--	--	-	-	-	--
Unigene4733_sinensis	2464	184	1195	13.4054	104.3620	2.96071032418116	Up	3.10576e-224	1.08731252984925e-221	gi|116180|sp|P13952.1|CCNB_SPISO	657.9	0.0	RecName: Full=G2/mitotic-specific cyclin-B	gi|10336|emb|X15485.1|	525	1e-145	Spisula solidissmima mRNA for cyclin B	sp|P13952|CCNB_SPISO	657	0.0	G2/mitotic-specific cyclin-B OS=Spisula solidissima PE=2 SV=1	SPBC582.03	217	7e-56	COG5024	Cyclin	K05868	2e-95	351	xla:397742	cyclin B	GO:0051726//regulation of cell cycle	GO:0005113//patched binding	GO:0043229//intracellular organelle	--
CL7238.Contig1_sinensis	2438	13	84	0.9572	7.4141	2.95337927210127	Up	3.8014e-17	1.57361697326203e-15	gi|405971502|gb|EKC36337.1|	505.8	4e-141	Rho GTPase-activating protein 19 [Crassostrea gigas]	--	--	--	--	sp|Q5F3G0|RHG19_CHICK	202	3e-51	Rho GTPase-activating protein 19 OS=Gallus gallus GN=ARHGAP19 PE=2 SV=1	--	--	--	--	--	K10360	5e-13	77.4	api:100166437	myosin IX	-	-	-	--
Unigene3099_sinensis	3328	39	252	2.1037	16.2942	2.95335763388435	Up	1.59782e-48	1.46858207889182e-46	gi|405968838|gb|EKC33867.1|	1403.7	0.0	WD repeat-containing protein 63 [Crassostrea gigas]	gi|291240524|ref|XM_002740127.1|	67.9	3e-07	PREDICTED: Saccoglossus kowalevskii hypothetical protein LOC100372439 (LOC100372439), mRNA	sp|Q8IWG1|WDR63_HUMAN	870	0.0	WD repeat-containing protein 63 OS=Homo sapiens GN=WDR63 PE=2 SV=1	--	--	--	--	--	K11143	6e-34	147	smm:Smp_103920	dynein intermediate chain 2, axonemal	-	-	-	--
Unigene31493_sinensis	2468	226	1459	16.4386	127.2111	2.95206521902845	Up	1.61757e-272	6.99965741180124e-270	gi|123434429|ref|XP_001308810.1|	67.8	3e-09	hypothetical protein [Trichomonas vaginalis G3] >gi|121890508|gb|EAX95880.1| hypothetical protein TVAG_008910 [Trichomonas vaginalis G3]	--	--	--	--	sp|Q17Q32|ENOPH_AEDAE	58.2	9e-08	Enolase-phosphatase E1 OS=Aedes aegypti GN=AAEL000109 PE=3 SV=1	CAC2736	51.2	8e-06	COG0419	ATPase involved in DNA repair	K09880	3e-07	58.2	aag:AaeL_AAEL000109	enolase-phosphatase E1 [EC:3.1.3.77]	-	-	-	--
Unigene5188_sinensis	2034	20	129	1.7651	13.6475	2.9508148716949	Up	1.475334e-25	8.43883780344827e-24	gi|405970966|gb|EKC35827.1|	408.7	6e-112	Zinc finger B-box domain containing protein 1 [Crassostrea gigas]	--	--	--	--	sp|A8MT70|ZBBX_HUMAN	159	3e-38	Zinc finger B-box domain-containing protein 1 OS=Homo sapiens GN=ZBBX PE=2 SV=3	--	--	--	--	--	K13172	2e-10	68.2	der:Dere_GG14576	serine/arginine repetitive matrix protein 2	-	-	-	--
Unigene27571_sinensis	1235	194	1251	28.1992	217.9743	2.95043190615282	Up	8.21222e-234	3.02718071523809e-231	gi|405957998|gb|EKC24169.1|	363.2	1e-98	hypothetical protein CGI_10006712 [Crassostrea gigas]	gi|291232685|ref|XM_002736245.1|	67.9	1e-07	PREDICTED: Saccoglossus kowalevskii hypothetical protein LOC100373069 (LOC100373069), mRNA	sp|A9JS51|F166B_XENLA	212	2e-54	Protein FAM166B OS=Xenopus laevis GN=fam166b PE=2 SV=1	--	--	--	--	--	--	--	--	--	--	-	-	-	--
CL6130.Contig2_sinensis	2627	9	58	0.6150	4.7510	2.94957289118424	Up	3.10256e-12	9.9793283767313e-11	gi|405951312|gb|EKC19236.1|	414.1	2e-113	UPF0638 protein B [Crassostrea gigas]	--	--	--	--	sp|P0C875|F228B_HUMAN	105	4e-22	Protein FAM228B OS=Homo sapiens GN=FAM228B PE=2 SV=1	--	--	--	--	--	--	--	--	--	--	-	-	-	--
Unigene16296_sinensis	704	131	844	33.4041	257.9793	2.94915821565248	Up	2.734e-158	6.68333494736842e-156	gi|326434009|gb|EGD79579.1|	65.5	2e-09	profilin [Salpingoeca sp. ATCC 50818]	--	--	--	--	sp|Q68HB4|PROF_BOMMO	52.8	7e-07	Profilin OS=Bombyx mori PE=2 SV=1	--	--	--	--	--	K05759	1e-09	63.9	nve:NEMVE_v1g171063	profilin	-	-	-	--
CL1206.Contig2_sinensis	1437	7	45	0.8745	6.7386	2.94591860142724	Up	9.14864e-10	2.43831905187452e-08	gi|405968947|gb|EKC33970.1|	221.1	1e-55	Putative RNA-directed DNA polymerase from transposon BS [Crassostrea gigas]	gi|41016185|gb|AC112260.6|	69.9	3e-08	Mus musculus BAC clone RP23-185L5 from chromosome 18, complete sequence	--	--	--	--	--	--	--	--	--	K00787	1e-07	58.9	spu:576515	farnesyl diphosphate synthase [EC:2.5.1.1 2.5.1.10]	-	-	-	--
Unigene33320_sinensis	5038	568	3649	20.2391	155.8586	2.94502072024366	Up	0	0	gi|405966182|gb|EKC31494.1|	902.9	0.0	Atrial natriuretic peptide receptor A [Crassostrea gigas]	gi|157109533|ref|XM_001650662.1|	77.8	5e-10	Aedes aegypti atrial natriuretic peptide receptor partial mRNA	sp|P18293|ANPRA_MOUSE	669	0.0	Atrial natriuretic peptide receptor 1 OS=Mus musculus GN=Npr1 PE=2 SV=2	all0661	177	1e-43	COG2114	Adenylate cyclase, family 3 (some proteins contain HAMP domain)	K12323	0.0	733	cqu:CpipJ_CPIJ000998	atrial natriuretic peptide receptor A [EC:4.6.1.2]	-	GO:0003824//catalytic activity	-	--
Unigene33997_sinensis	1181	187	1201	28.4245	218.8306	2.94460761354569	Up	4.3655e-224	1.51313442537313e-221	gi|118381947|ref|XP_001024133.1|	65.1	8e-09	Viral A-type inclusion protein repeat containing protein [Tetrahymena thermophila] >gi|89305900|gb|EAS03888.1| Viral A-type inclusion protein repeat containing protein [Tetrahymena thermophila SB210]	--	--	--	--	sp|O76329|ACTNB_DICDI	59.7	1e-08	Interaptin OS=Dictyostelium discoideum GN=abpD PE=1 SV=1	aq_629	57.0	6e-08	COG1196	Chromosome segregation ATPases	K12478	1e-07	58.5	cel:T10G3.5	early endosome antigen 1	-	-	-	--
Unigene27711_sinensis	1897	351	2249	33.2155	255.1157	2.94122314925352	Up	0	0	gi|405957724|gb|EKC23914.1|	443.7	1e-122	Coiled-coil domain-containing protein 63 [Crassostrea gigas]	--	--	--	--	sp|Q2T9W3|CCD63_BOVIN	266	1e-70	Coiled-coil domain-containing protein 63 OS=Bos taurus GN=CCDC63 PE=2 SV=1	MJ1322	67.8	6e-11	COG0419	ATPase involved in DNA repair	K10352	3e-14	81.3	isc:IscW_ISCW001340	myosin heavy chain	-	-	-	--
Unigene584_sinensis	1704	167	1070	17.5933	135.1230	2.94117524267306	Up	1.299928e-199	4.06119658439462e-197	gi|405961914|gb|EKC27647.1|	506.1	2e-141	Innexin unc-9 [Crassostrea gigas]	gi|241998365|ref|XM_002433781.1|	63.9	2e-06	Ixodes scapularis innexin, putative, mRNA	sp|O01393|UNC9_CAEEL	263	9e-70	Innexin unc-9 OS=Caenorhabditis elegans GN=unc-9 PE=2 SV=1	--	--	--	--	--	--	--	--	--	--	-	-	-	--
Unigene36057_sinensis	3205	149	954	8.3456	64.0524	2.94016494859044	Up	4.09456e-178	1.13199960571429e-175	gi|405968169|gb|EKC33266.1|	531.9	8e-149	hypothetical protein CGI_10012646 [Crassostrea gigas]	--	--	--	--	sp|P70670|NACAM_MOUSE	64.3	2e-09	Nascent polypeptide-associated complex subunit alpha, muscle-specific form OS=Mus musculus GN=Naca PE=1 SV=2	SPAC140.02	52.0	6e-06	COG0724	RNA-binding proteins (RRM domain)	K10955	4e-11	71.6	tgu:100220116	intestinal mucin-2	-	-	-	--
Unigene32435_sinensis	3281	207	1325	11.3257	86.9010	2.93977255800915	Up	1.330892e-246	5.17999523731843e-244	gi|405977618|gb|EKC42060.1|	1429.8	0.0	IQ and AAA domain-containing protein 1 [Crassostrea gigas]	gi|459182624|ref|XM_002129629.2|	69.9	8e-08	PREDICTED: Ciona intestinalis IQ and AAA domain-containing protein 1-like (LOC100182784), mRNA	sp|Q86XH1|IQCA1_HUMAN	918	0.0	IQ and AAA domain-containing protein 1 OS=Homo sapiens GN=IQCA1 PE=2 SV=1	SPAC2G11.06	82.4	5e-15	COG0464	ATPases of the AAA+ class	K00665	2e-177	624	tca:658978	fatty acid synthase, animal type [EC:2.3.1.85]	-	GO:0005524//ATP binding	-	--
Unigene4720_sinensis	736	5	32	1.2195	9.3559	2.93958668347554	Up	2.80522e-07	5.65173141064199e-06	--	--	--	--	--	--	--	--	--	--	--	--	--	--	--	--	--	--	--	--	--	--	-	-	-	--
Unigene4199_sinensis	451	5	32	1.9902	15.2682	2.93954466675449	Up	2.80522e-07	5.65336627654035e-06	--	--	--	--	--	--	--	--	--	--	--	--	--	--	--	--	--	--	--	--	--	--	-	-	-	--
CL343.Contig3_sinensis	2201	8	51	0.6525	4.9861	2.93386201066269	Up	7.34394e-11	2.15883947620253e-09	gi|260787863|ref|XP_002588971.1|	154.1	3e-35	hypothetical protein BRAFLDRAFT_89162 [Branchiostoma floridae] >gi|229274143|gb|EEN44982.1| hypothetical protein BRAFLDRAFT_89162 [Branchiostoma floridae]	--	--	--	--	sp|P17221|FEM1_CAEEL	77.8	9e-14	Sex-determining protein fem-1 OS=Caenorhabditis elegans GN=fem-1 PE=1 SV=1	all2748	67.0	1e-10	COG0666	FOG: Ankyrin repeat	K10380	2e-14	81.6	spu:754357	ankyrin	GO:0018992//germ-line sex determination;GO:0030238//male sex determination	-	-	--
CL6362.Contig1_sinensis	1470	8	51	0.9770	7.4657	2.93384706956826	Up	7.34394e-11	2.157928957655e-09	--	--	--	--	--	--	--	--	--	--	--	--	--	--	--	--	--	--	--	--	--	--	-	-	-	--
Unigene1679_sinensis	2194	19	121	1.5546	11.8676	2.93241287994047	Up	6.44186e-24	3.50623394015625e-22	gi|390332131|ref|XP_782682.3|	454.1	1e-125	PREDICTED: IQ calmodulin-binding motif-containing protein 1-like [Strongylocentrotus purpuratus]	--	--	--	--	sp|Q8BP00|IQCB1_MOUSE	352	2e-96	IQ calmodulin-binding motif-containing protein 1 OS=Mus musculus GN=Iqcb1 PE=1 SV=2	--	--	--	--	--	K10357	8e-10	66.6	cbr:CBG19269	myosin V	GO:0045494//photoreceptor cell maintenance;GO:0048496//maintenance of organ identity	GO:0005516//calmodulin binding	GO:0005813//centrosome;GO:0032391//photoreceptor connecting cilium	--
Unigene39140_sinensis	9167	333	2120	6.5211	49.7650	2.93194419501426	Up	0	0	gi|405969117|gb|EKC34123.1|	4512.6	0.0	Dynein heavy chain 7, axonemal [Crassostrea gigas]	gi|4033607|dbj|AB012308.1|	210	9e-50	Heliocidaris crassispina mRNA for B2HC, partial cds	sp|Q8WXX0|DYH7_HUMAN	3872	0.0	Dynein heavy chain 7, axonemal OS=Homo sapiens GN=DNAH7 PE=1 SV=2	YKR054c	380	2e-104	COG5245	Dynein, heavy chain	K10408	0.0	3167	acs:100564145	dynein heavy chain, axonemal	GO:0006200//ATP catabolic process;GO:0001539//ciliary or flagellar motility;GO:0007018//microtubule-based movement	GO:0003777//microtubule motor activity;GO:0005509//calcium ion binding;GO:0005524//ATP binding;GO:0016887//ATPase activity	GO:0035085//cilium axoneme;GO:0005858//axonemal dynein complex;GO:0005874//microtubule	--
Unigene16773_sinensis	377	17	108	8.0949	61.6449	2.92889637917709	Up	1.777956e-21	8.84142873404711e-20	--	--	--	--	gi|134035969|gb|EF446612.1|	77.8	3e-11	Corbicula fluminea 12S ribosomal RNA gene, partial sequence; mitochondrial	--	--	--	--	--	--	--	--	--	--	--	--	--	--	-	-	-	--
Unigene32808_sinensis	1297	23	146	3.1834	24.2230	2.92773720204143	Up	1.635762e-28	1.01209505131439e-26	gi|405961498|gb|EKC27291.1|	287.0	1e-75	Uncharacterized protein C7orf62 [Crassostrea gigas]	--	--	--	--	sp|Q8TBZ9|CG062_HUMAN	140	6e-33	Uncharacterized protein C7orf62 OS=Homo sapiens GN=C7orf62 PE=2 SV=1	--	--	--	--	--	--	--	--	--	--	-	-	-	--
CL2516.Contig1_sinensis	2381	29	184	2.1865	16.6293	2.92703218702466	Up	1.557016e-35	1.12760652498961e-33	gi|405975833|gb|EKC40375.1|	134.4	2e-29	Doublecortin domain-containing protein 2 [Crassostrea gigas]	--	--	--	--	sp|D3ZR10|DCDC2_RAT	72.4	4e-12	Doublecortin domain-containing protein 2 OS=Rattus norvegicus GN=Dcdc2 PE=2 SV=1	--	--	--	--	--	--	--	--	--	--	-	-	-	--
Unigene32420_sinensis	1866	102	647	9.8127	74.6118	2.92668175457276	Up	8.1504e-121	1.51826261390374e-118	gi|260814181|ref|XP_002601794.1|	298.9	6e-79	hypothetical protein BRAFLDRAFT_75985 [Branchiostoma floridae] >gi|229287096|gb|EEN57806.1| hypothetical protein BRAFLDRAFT_75985 [Branchiostoma floridae]	--	--	--	--	sp|Q3TZ65|OD3L2_MOUSE	70.5	1e-11	Outer dense fiber protein 3-like protein 2 OS=Mus musculus GN=Odf3l2 PE=2 SV=1	--	--	--	--	--	--	--	--	--	--	-	-	-	--
Unigene5259_sinensis	3621	150	951	7.4364	56.5154	2.92596776484369	Up	1.129548e-176	3.086058024e-174	gi|405960876|gb|EKC26750.1|	1230.3	0.0	Ankyrin repeat and MYND domain-containing protein 1 [Crassostrea gigas]	--	--	--	--	sp|Q9P2S6|ANKY1_HUMAN	548	2e-155	Ankyrin repeat and MYND domain-containing protein 1 OS=Homo sapiens GN=ANKMY1 PE=2 SV=2	slr1485	105	4e-22	COG4642	Uncharacterized protein conserved in bacteria	K04575	1e-15	87.0	dre:100318899	amyotrophic lateral sclerosis 2 (juvenile)	-	-	-	--
Unigene23186_sinensis	273	6	38	3.9454	29.9527	2.92444257766933	Up	2.20376e-08	5.09064175862069e-07	--	--	--	--	--	--	--	--	--	--	--	--	--	--	--	--	--	--	--	--	--	--	-	-	-	--
Unigene2526_sinensis	1315	6	38	0.8191	6.2183	2.92440872127699	Up	2.20376e-08	5.09401975580624e-07	gi|357604620|gb|EHJ64261.1|	199.5	3e-49	putative transcription elongation factor B polypeptide 3 binding protein 1 isoform 1 [Danaus plexippus]	--	--	--	--	sp|P48778|GOR_PANTR	196	1e-49	Exonuclease GOR OS=Pan troglodytes GN=REXO1L1 PE=2 SV=3	SPAC1782.08c	124	4e-28	COG0847	DNA polymerase III, epsilon subunit and related 3'-5' exonucleases	K14570	9e-50	198	aml:100484127	RNA exonuclease 1 [EC:3.1.-.-]	-	-	-	--
Unigene25726_sinensis	1581	6	38	0.6813	5.1721	2.92438805733558	Up	2.20376e-08	5.09233019701493e-07	gi|405957441|gb|EKC23651.1|	386.0	3e-105	hypothetical protein CGI_10007985 [Crassostrea gigas]	--	--	--	--	sp|Q6NUN7|CK063_HUMAN	59.7	2e-08	Uncharacterized protein C11orf63 OS=Homo sapiens GN=C11orf63 PE=2 SV=1	--	--	--	--	--	--	--	--	--	--	-	-	-	--
Unigene7982_sinensis	2343	268	1697	20.5336	155.8564	2.92415890671233	Up	0	0	gi|401403671|ref|XP_003881534.1|	69.7	8e-10	conserved hypothetical protein [Neospora caninum Liverpool] >gi|325115947|emb|CBZ51501.1| conserved hypothetical protein [Neospora caninum Liverpool]	--	--	--	--	sp|O76329|ACTNB_DICDI	59.7	3e-08	Interaptin OS=Dictyostelium discoideum GN=abpD PE=1 SV=1	--	--	--	--	--	K00907	9e-12	73.2	dan:Dana_GF13333	myosin-light-chain kinase [EC:2.7.11.18]	-	-	-	--
CL60.Contig1_sinensis	4202	56	354	2.3924	18.1285	2.92172902978942	Up	9.04412e-67	1.0519111790985e-64	gi|118376322|ref|XP_001021343.1|	72.4	2e-10	hypothetical protein TTHERM_00316510 [Tetrahymena thermophila] >gi|89303110|gb|EAS01098.1| hypothetical protein TTHERM_00316510 [Tetrahymena thermophila SB210]	--	--	--	--	sp|Q9W596|FUTSC_DROME	57.8	2e-07	Microtubule-associated protein futsch OS=Drosophila melanogaster GN=futsch PE=1 SV=4	--	--	--	--	--	K13172	2e-09	66.6	ame:725959	serine/arginine repetitive matrix protein 2	-	-	-	--
CL8910.Contig1_sinensis	1059	131	828	22.2063	168.2478	2.92154670328506	Up	7.99568e-154	1.91426470762887e-151	gi|21321260|dbj|BAB97379.1|	149.8	2e-34	amyloid protein A [Branchiostoma belcheri]	gi|291464004|gb|GQ337916.1|	67.9	1e-07	Lates calcarifer serum amyloid A (SAA) mRNA, complete cds	sp|P20727|SAA2_MESAU	144	4e-34	Serum amyloid A-2 protein OS=Mesocricetus auratus GN=SAA2 PE=2 SV=1	--	--	--	--	--	--	--	--	--	--	GO:0050896//response to stimulus	-	GO:0005576//extracellular region	--
Unigene29284_sinensis	676	47	297	12.4811	94.5420	2.92121029546642	Up	2.83126e-56	2.85457384862518e-54	gi|405959421|gb|EKC25463.1|	114.4	4e-24	hypothetical protein CGI_10012807 [Crassostrea gigas]	--	--	--	--	sp|Q9DAR0|CE049_MOUSE	68.6	1e-11	Uncharacterized protein C5orf49 homolog OS=Mus musculus PE=2 SV=1	--	--	--	--	--	--	--	--	--	--	-	-	-	--
CL2689.Contig3_sinensis	4703	79	499	3.0155	22.8318	2.92057546207755	Up	2.19946e-93	3.28124579743041e-91	gi|123469906|ref|XP_001318162.1|	58.2	5e-06	viral A-type inclusion protein [Trichomonas vaginalis G3]	--	--	--	--	sp|O76329|ACTNB_DICDI	64.7	2e-09	Interaptin OS=Dictyostelium discoideum GN=abpD PE=1 SV=1	SA1562	57.0	3e-07	COG1674	DNA segregation ATPase FtsK/SpoIIIE and related proteins	K00907	3e-08	62.4	dme:Dmel_CG18255	myosin-light-chain kinase [EC:2.7.11.18]	-	-	-	--
Unigene33737_sinensis	2128	78	492	6.5800	49.7518	2.9185892336504	Up	4.92936e-92	7.2759233440678e-90	gi|443705969|gb|ELU02265.1|	456.8	2e-126	hypothetical protein CAPTEDRAFT_163594 [Capitella teleta]	gi|340378079|ref|XM_003387508.1|	95.6	9e-16	PREDICTED: Amphimedon queenslandica ADP,ATP carrier protein-like (LOC100633390), mRNA	sp|Q27238|ADT1_ANOGA	283	1e-75	ADP,ATP carrier protein 1 OS=Anopheles gambiae GN=AGAP006782 PE=2 SV=2	--	--	--	--	--	K05863	6e-127	455	nve:NEMVE_v1g246069	solute carrier family 25 (mitochondrial adenine nucleotide translocator), member 4/5/6/31	GO:0055085//transmembrane transport	GO:0005215//transporter activity	GO:0005743//mitochondrial inner membrane;GO:0016021//integral to membrane	--
[truncated: 2,607 more rows]
